# Supplementary material for: Differential distribution and enrichment of non-coding RNAs in exosomes from normal and Cancer-associated fibroblasts in colorectal cancer
Source: Mol Cancer. 2018 Aug 3;17:114. doi: 10.1186/s12943-018-0863-4 (PMC6091058; doi:10.1186/s12943-018-0863-4)
Supplement: Supplementary file 2 — Absolute and average relative counts of reads mapped to each ncRNAs biotype per sample and fraction. (XLSX 15 kb) [file 12943_2018_863_MOESM2_ESM.xlsx]

## Sheet: Summary
Supplementary File 1.- Summarization of absolute and average relative counts of reads mapped to each ncRNAs biotype per sample and fraction
Types	Biotypes	Cellular Fraction										Exosomal Fraction
		Normal Fibroblasts (NF) Samples					Carninoma-Associated Fibroblasts (CAF-CELL) Samples					NF-derived Exosomes (NF-EXO) Samples					CAF-derived Exosomes (CAF-EXO) Samples
		1 NF-CELL	2 NF-CELL	3 NF-CELL	TOTAL	RELATIVE FREQUENCY	1 CAF-CELL	2 CAF-CELL	3 CAF-CELL	TOTAL	RELATIVE FREQUENCY	1 NF-EXO	2 NF-EXO	3 NF-EXO	TOTAL	RELATIVE FREQUENCY	1 CAF-EXO	2 CAF-EXO	3 CAF-EXO	TOTAL	RELATIVE FREQUENCY
lncRNA	3prime_overlapping_ncrna	138	179	119	436	8.09918e-05	92	135	209	436	8.99312e-05	19	9	11	39	4.54051e-06	4	13	9	26	4.75824e-06
lncRNA	lincRNA	528975	907699	346633	1783307	0.331269	209350	343857	437752	990959	0.204399	109982	129209	155691	394882	0.0459735	37677	368927	113187	519791	0.0951265
lncRNA	macro_lncRNA	549	847	575	1971	0.000366135	402	740	962	2104	0.00043398	60	94	72	226	2.63117e-05	57	74	73	204	3.73339e-05
lncRNA	processed_transcript	232003	356095	287916	876014	0.162729	286436	360681	106320	753437	0.155407	1113	2140	2558	5811	0.000676536	1429	2422	2012	5863	0.00107298
lncRNA	ribozyme	2886	4658	3515	11059	0.00205433	2523	2749	2319	7591	0.00156575	579	776	1012	2367	0.000275574	268	495	401	1164	0.000213023
lncRNA	sense_intronic	190607	332304	284960	807871	0.150071	229592	263387	344526	837505	0.172747	49824	64508	55209	169541	0.0197385	16678	66661	21276	104615	0.0191455
lncRNA	sense_overlapping	1588	1558	1185	4331	0.000804531	826	968	1599	3393	0.000699855	307	347	374	1028	0.000119683	151	336	232	719	0.000131584
lncRNA	vaultRNA	40	259	99	398	7.39329e-05	27	115	433	575	0.000118602	695	1319	971	2985	0.000347524	174	658	382	1214	0.000222173
lncRNA*	scaRNA	2853	2945	2181	7979	0.00148219	2871	3585	1066	7522	0.00155152	31	75	67	173	2.01412e-05	36	60	58	154	2.81834e-05
sncRNA	YRNA	6835	7753	5238	19826	0.0036829	9217	8793	8299	26309	0.00542661	406867	365906	353092	1125865	0.131077	165226	326331	172129	663686	0.121461
sncRNA	miRNA	153431	225339	178208	556978	0.103465	257055	297705	229280	784040	0.161719	125055	82660	93294	301009	0.0350445	44723	96345	46257	187325	0.0342822
sncRNA	piRNA	327416	508841	332579	1168836	0.217124	345290	430963	518377	1294630	0.267036	2636412	1992963	1925730	6555105	0.763168	760796	2104587	1055261	3920644	0.717514
sncRNA	sRNA	0	3	1	4	7.43044e-07	2	2	4	8	1.65011e-06	27	18	23	68	7.91679e-06	10	30	15	55	1.00655e-05
sncRNA	snRNA	10965	26855	21778	59598	0.011071	11299	17884	36499	65682	0.0135479	2809	3580	3315	9704	0.00112977	11667	10038	22764	44469	0.00813823
sncRNA	snoRNA	19660	33974	30843	84477	0.0156925	21286	27840	24663	73789	0.01522	5781	7445	7094	20320	0.00236572	2712	8488	2955	14155	0.00259049
sncRNA	siRNA	39	72	64	175	3.25082e-05	31	44	94	169	3.48587e-05	55	67	93	215	2.5031e-05	30	83	10	123	2.25101e-05
Total reads		1477985	2409381	1495894	5383260	1	1376299	1759448	1712402	4848149	1	3339616	2651116	2598606	8589338	1	1477985	2409381	1495894	5464207	1
Notice that actually scaRNAs are not considered long ncRNAs but small ncRNAs usually classified as snoRNAs. However, they were included in the database of lncRNAs for sakes´s of the bioinformatic protocol as the size of scaRNAs is greater than 300 nucleotides. 1,2,3 correspond to the number of replicates.
