# Supplementary material for: Differential distribution and enrichment of non-coding RNAs in exosomes from normal and Cancer-associated fibroblasts in colorectal cancer
Source: Mol Cancer. 2018 Aug 3;17:114. doi: 10.1186/s12943-018-0863-4 (PMC6091058; doi:10.1186/s12943-018-0863-4)
Supplement: Supplementary file 3 — Excel document with the two count files used as input to EdgeR for differential expression analysis; one with the counts of reads of all samples mapped on the lncRNA references and another with the read counts of reads mapped on scnRNAs. (XLSX 221 kb) [file 12943_2018_863_MOESM3_ESM.xlsx]

## Sheet: read counts per lncRNA species
NAME	1 NF-CELL	2 NF-CELL	3 NF-CELL	1 NF-EXO	2 NF-EXO	3 NF-EXO	1 CAF-CELL	2 CAF-CELL	3 CAF-CELL	1 CAF-EXO	2 CAF-EXO	3 CAF-EXO
Grc38_ENST00000229465|lincRNA	20	33	24	1	3	1	19	32	51	0	3	1
Grc38_ENST00000242109|lincRNA	2	0	2	3	1	0	0	0	1	0	0	0
Grc38_ENST00000291374|lincRNA	0	3	1	0	0	0	2	0	3	0	0	0
Grc38_ENST00000313064|lincRNA	10	7	5	0	0	0	9	2	4	0	0	0
Grc38_ENST00000313303|processed_transcript	0	2	0	0	0	0	2	0	1	1	0	0
Grc38_ENST00000313495|lincRNA	13	17	20	0	1	0	13	21	37	0	0	2
Grc38_ENST00000313807|lincRNA	3	0	1	1	0	2	0	2	2	0	3	2
Grc38_ENST00000314957|sense_overlapping	0	2	1	0	0	0	0	2	3	0	0	0
Grc38_ENST00000315707|lincRNA	10	12	10	7	23	21	25	27	19	7	14	2
Grc38_ENST00000316124|lincRNA	1	3	3	0	2	1	1	1	0	0	2	0
Grc38_ENST00000316786|lincRNA	0	0	0	0	2	0	2	1	2	0	0	0
Grc38_ENST00000318186|processed_transcript	0	2	4	0	0	1	0	1	1	0	0	1
Grc38_ENST00000322227|processed_transcript	1	1	1	0	0	1	0	1	3	0	1	1
Grc38_ENST00000324446|lincRNA	0	0	3	0	0	0	0	2	4	1	0	0
Grc38_ENST00000324858|processed_transcript	25	10	2	3	0	0	0	0	2	0	0	0
Grc38_ENST00000333139|lincRNA	1	1	2	2	0	3	0	4	0	0	1	0
Grc38_ENST00000334146|lincRNA	9	4	4	0	1	0	2	0	3	0	0	0
Grc38_ENST00000339037|lincRNA	1	1	3	1	1	1	0	0	0	2	2	2
Grc38_ENST00000341011|lincRNA	1	5	1	2	0	0	2	3	1	0	0	2
Grc38_ENST00000344893|lincRNA	5	21	12	0	2	3	7	10	12	0	0	1
Grc38_ENST00000352367|processed_transcript	3	1	1	0	0	0	3	1	3	0	0	0
Grc38_ENST00000355837|processed_transcript	4	10	9	3	0	3	4	7	9	1	0	2
Grc38_ENST00000356047|lincRNA	15	21	15	0	0	1	17	25	28	1	3	0
Grc38_ENST00000356684|lincRNA	3	3	0	0	0	0	1	1	6	0	1	0
Grc38_ENST00000357412|lincRNA	14	6	4	0	0	0	0	0	6	0	0	0
Grc38_ENST00000358446|lincRNA	3	2	0	0	0	0	0	0	3	1	0	0
Grc38_ENST00000358748|lincRNA	0	4	1	0	1	0	0	0	1	0	0	0
Grc38_ENST00000359760|lincRNA	0	1	1	0	0	0	0	0	0	0	0	0
Grc38_ENST00000360083|lincRNA	6	4	4	1	0	2	2	8	9	0	0	0
Grc38_ENST00000360737|lincRNA	10	17	12	34	52	51	6	18	13	11	29	15
Grc38_ENST00000363046|ribozyme	253	551	437	36	57	63	201	328	306	23	39	42
Grc38_ENST00000366181|lincRNA	14	18	9	1	2	0	7	4	19	2	0	1
Grc38_ENST00000366185|lincRNA	14	105	30	34	49	55	23	85	100	13	47	8
Grc38_ENST00000366314|lincRNA	2	1	2	0	1	0	2	2	1	0	1	0
Grc38_ENST00000366365|processed_transcript	19	44	31	1	2	1	31	35	27	0	3	5
Grc38_ENST00000366424|lincRNA	2	6	2	0	0	1	0	2	5	0	0	1
Grc38_ENST00000366441|processed_transcript	9	7	11	0	1	1	10	22	3	2	0	1
Grc38_ENST00000369605|processed_transcript	4	5	3	5	2	2	1	5	3	0	1	0
Grc38_ENST00000371086|sense_intronic	0	2	1	2	0	0	1	2	2	0	0	0
Grc38_ENST00000371162|lincRNA	1	2	1	3	0	1	1	2	1	0	0	0
Grc38_ENST00000373508|lincRNA	2	2	1	0	0	0	0	2	4	0	0	0
Grc38_ENST00000374945|lincRNA	1	3	1	0	0	1	2	0	0	0	2	0
Grc38_ENST00000375644|lincRNA	1	0	0	0	0	0	0	0	0	0	0	0
Grc38_ENST00000379053|lincRNA	1	3	0	0	0	0	0	0	1	0	0	0
Grc38_ENST00000379640|lincRNA	2	1	1	0	0	0	0	3	1	0	0	0
Grc38_ENST00000381108|lincRNA	1	3	2	0	0	0	1	0	2	0	1	1
Grc38_ENST00000381217|lincRNA	0	0	1	0	5	0	1	0	3	0	0	0
Grc38_ENST00000382641|lincRNA	1	0	4	0	2	0	1	0	1	2	0	2
Grc38_ENST00000391625|lincRNA	0	1	0	0	0	0	0	0	3	0	0	0
Grc38_ENST00000392385|lincRNA	31	60	40	7	13	14	24	41	73	8	10	5
Grc38_ENST00000393264|lincRNA	4	6	0	1	3	0	1	0	2	0	0	0
Grc38_ENST00000395400|processed_transcript	6	4	2	0	0	0	0	3	0	0	1	1
Grc38_ENST00000396880|sense_intronic	0	3	1	1	3	1	0	1	2	0	0	0
Grc38_ENST00000397057|sense_overlapping	0	1	1	0	0	0	1	0	2	0	0	0
Grc38_ENST00000398461|lincRNA	2	5	2	0	0	1	1	6	7	1	0	0
Grc38_ENST00000398474|lincRNA	1	1	5	0	0	1	0	1	1	0	0	0
Grc38_ENST00000398957|sense_intronic	3	3	1	1	0	0	0	0	1	0	0	0
Grc38_ENST00000399003|lincRNA	2	0	0	0	0	0	0	2	2	0	0	0
Grc38_ENST00000399242|sense_intronic	2	2	1	0	2	1	1	2	5	0	0	1
Grc38_ENST00000399387|lincRNA	3	1	3	1	0	1	2	0	1	0	3	4
Grc38_ENST00000399449|processed_transcript	0	5	2	0	3	1	1	3	4	0	0	0
Grc38_ENST00000399711|lincRNA	3	2	1	2	1	0	2	4	0	1	2	0
Grc38_ENST00000399866|lincRNA	1	2	0	1	1	1	0	1	1	1	0	4
Grc38_ENST00000400436|processed_transcript	18	28	18	0	0	0	14	28	8	0	0	1
Grc38_ENST00000400593|lincRNA	0	0	1	0	0	0	0	1	1	0	0	0
Grc38_ENST00000401018|lincRNA	0	0	0	0	0	0	0	2	1	0	0	0
Grc38_ENST00000409590|lincRNA	2	3	0	0	0	0	1	1	2	0	0	0
Grc38_ENST00000411436|lincRNA	0	1	0	0	0	0	0	0	0	0	0	0
Grc38_ENST00000411509|lincRNA	19	28	15	3	2	2	18	26	20	0	0	0
Grc38_ENST00000411553|lincRNA	1	5	4	1	0	1	4	1	5	0	0	1
Grc38_ENST00000411575|lincRNA	1	5	3	0	1	3	2	1	3	0	1	0
Grc38_ENST00000411895|sense_intronic	12	12	4	1	0	1	3	0	5	1	0	0
Grc38_ENST00000411921|processed_transcript	3	1	0	3	1	1	1	2	5	0	1	0
Grc38_ENST00000412059|processed_transcript	2247	3001	1810	4	7	8	3285	3103	1030	2	4	1
Grc38_ENST00000412068|lincRNA	0	0	2	0	1	1	1	2	0	0	0	0
Grc38_ENST00000412242|sense_intronic	3	4	1	0	1	0	1	3	4	0	0	0
Grc38_ENST00000412422|lincRNA	3	2	2	0	0	3	1	4	4	1	0	0
Grc38_ENST00000412553|lincRNA	1	8	8	0	2	2	1	10	7	0	0	0
Grc38_ENST00000412816|lincRNA	2	1	0	1	0	0	0	1	1	0	0	0
Grc38_ENST00000413042|lincRNA	1	0	0	0	0	0	0	1	0	0	0	0
Grc38_ENST00000413053|lincRNA	5	7	4	0	0	1	3	4	8	0	4	0
Grc38_ENST00000413291|lincRNA	5	7	5	2	0	0	0	8	5	0	0	0
Grc38_ENST00000413842|processed_transcript	5	1	1	1	0	1	3	0	2	0	0	0
Grc38_ENST00000413862|processed_transcript	3	5	0	5	1	3	1	3	0	1	1	0
Grc38_ENST00000413935|processed_transcript	1	3	1	0	1	0	0	3	1	0	0	0
Grc38_ENST00000413987|sense_intronic	6	2	0	0	0	0	2	4	1	0	0	0
Grc38_ENST00000414159|lincRNA	0	2	0	0	1	0	1	1	1	0	0	0
Grc38_ENST00000414175|processed_transcript	1	1	4	0	0	0	8	7	3	0	0	0
Grc38_ENST00000414209|lincRNA	0	2	3	0	2	1	1	1	0	0	0	2
Grc38_ENST00000414227|sense_overlapping	2	1	1	0	0	0	0	1	1	0	0	0
Grc38_ENST00000414287|lincRNA	0	2	0	2	0	0	0	0	2	0	0	0
Grc38_ENST00000414562|lincRNA	0	2	2	2	3	1	0	2	4	0	0	0
Grc38_ENST00000414662|processed_transcript	1	5	4	2	0	0	2	2	3	0	0	0
Grc38_ENST00000414786|processed_transcript	0	1	1	7	2	0	0	0	1	0	4	0
Grc38_ENST00000414816|lincRNA	0	0	1	1	0	0	1	0	3	1	0	0
Grc38_ENST00000414890|sense_intronic	6	26	7	0	2	1	9	18	24	0	1	1
Grc38_ENST00000414948|sense_intronic	0	3	0	1	1	1	0	2	2	0	0	2
Grc38_ENST00000415019|lincRNA	14	8	10	1	1	1	11	4	23	0	1	0
Grc38_ENST00000415150|processed_transcript	0	0	0	0	0	0	0	0	1	0	0	0
Grc38_ENST00000415338|lincRNA	2	0	1	0	0	0	0	3	1	0	0	0
Grc38_ENST00000415386|lincRNA	1181	613	1514	2368	2218	2287	413	824	2611	681	2591	741
Grc38_ENST00000415663|sense_intronic	0	4	0	2	0	0	3	2	4	0	1	0
Grc38_ENST00000415801|lincRNA	2	2	3	0	0	0	0	1	5	0	1	0
Grc38_ENST00000416191|lincRNA	0	2	0	0	0	0	0	0	0	0	0	0
Grc38_ENST00000416381|lincRNA	0	0	0	0	0	0	0	2	2	0	0	0
Grc38_ENST00000416385|lincRNA	5	10	5	1	0	0	0	0	11	1	2	0
Grc38_ENST00000416689|lincRNA	5	8	1	0	0	0	7	5	7	0	0	0
Grc38_ENST00000416952|processed_transcript	793	1652	1116	0	1	7	1358	1965	424	3	2	1
Grc38_ENST00000416982|lincRNA	0	1	0	0	0	0	0	0	0	0	0	0
Grc38_ENST00000417120|sense_intronic	0	0	2	0	0	0	0	0	1	0	0	0
Grc38_ENST00000417218|lincRNA	3	1	1	0	0	0	0	1	2	0	0	0
Grc38_ENST00000417483|lincRNA	0	1	0	0	0	0	0	0	0	0	0	0
Grc38_ENST00000418006|lincRNA	1	0	0	0	2	1	1	0	0	0	0	0
Grc38_ENST00000418344|lincRNA	3	7	3	0	0	2	5	4	7	3	0	1
Grc38_ENST00000418420|lincRNA	14	17	11	0	0	1	2	2	13	0	0	0
Grc38_ENST00000418534|lincRNA	6	6	1	2	4	1	3	2	7	2	2	1
Grc38_ENST00000418539|lincRNA	46	54	47	19	29	40	20	41	54	17	40	12
Grc38_ENST00000418574|lincRNA	45	62	16	2	3	1	2	4	17	1	4	2
Grc38_ENST00000418591|lincRNA	0	1	0	0	0	0	0	1	0	0	0	0
Grc38_ENST00000418679|lincRNA	4	0	0	2	0	0	0	0	0	0	0	0
Grc38_ENST00000418821|lincRNA	0	2	0	0	0	0	0	0	1	0	0	0
Grc38_ENST00000418839|lincRNA	5	1	3	0	0	0	0	2	3	0	2	0
Grc38_ENST00000419160|lincRNA	0	3	2	0	0	0	0	1	2	0	0	0
Grc38_ENST00000419272|lincRNA	1	0	1	0	0	0	1	1	0	0	0	0
Grc38_ENST00000419300|processed_transcript	15	28	13	2	2	7	13	10	12	0	1	5
Grc38_ENST00000419362|lincRNA	7	4	4	0	1	1	2	1	5	0	3	0
Grc38_ENST00000419458|lincRNA	2	1	1	1	0	0	1	2	5	0	0	0
Grc38_ENST00000419745|lincRNA	1	8	7	0	1	0	3	8	6	1	0	1
Grc38_ENST00000419766|processed_transcript	3	1	1	0	0	0	1	0	2	1	0	0
Grc38_ENST00000419784|lincRNA	0	2	0	0	0	0	0	1	1	0	0	0
Grc38_ENST00000419813|lincRNA	2	5	8	0	1	0	6	9	17	0	0	0
Grc38_ENST00000419853|lincRNA	1	1	1	0	0	0	2	1	3	0	0	0
Grc38_ENST00000419895|lincRNA	5	3	0	0	3	2	1	3	0	0	3	1
Grc38_ENST00000420255|lincRNA	0	0	1	0	0	0	0	0	0	0	0	0
Grc38_ENST00000420330|lincRNA	25	16	7	0	1	1	10	4	14	0	0	1
Grc38_ENST00000420364|sense_overlapping	0	3	1	0	0	0	0	2	1	0	0	0
Grc38_ENST00000420508|lincRNA	4	8	4	0	0	0	0	1	5	0	0	1
Grc38_ENST00000420572|lincRNA	8	8	2	0	0	0	0	0	0	0	0	0
Grc38_ENST00000420585|lincRNA	0	3	2	0	1	1	2	4	3	0	0	0
Grc38_ENST00000420724|lincRNA	1	1	1	0	0	2	2	0	0	2	0	4
Grc38_ENST00000420823|lincRNA	7	5	4	0	0	0	1	1	6	0	0	1
Grc38_ENST00000420856|processed_transcript	3	3	4	0	0	0	4	2	4	0	0	0
Grc38_ENST00000420866|lincRNA	1	2	4	0	0	0	1	1	1	0	0	1
Grc38_ENST00000420902|sense_intronic	1	4	0	0	1	0	1	1	2	0	0	0
Grc38_ENST00000420905|lincRNA	1	2	0	0	0	0	1	2	2	0	0	0
Grc38_ENST00000420918|processed_transcript	7	10	6	0	0	4	3	2	8	0	0	1
Grc38_ENST00000421064|processed_transcript	4	1	2	0	0	0	0	0	1	0	0	0
Grc38_ENST00000421068|processed_transcript	8993	10498	7991	7	23	57	11175	11421	3581	12	28	8
Grc38_ENST00000421121|processed_transcript	1	3	0	0	0	0	0	0	0	0	0	0
Grc38_ENST00000421202|processed_transcript	9	20	21	0	1	0	8	20	18	0	1	0
Grc38_ENST00000421378|lincRNA	0	2	0	0	1	0	0	0	0	0	0	0
Grc38_ENST00000421505|lincRNA	1	1	3	0	1	0	0	3	2	1	0	1
Grc38_ENST00000421598|lincRNA	1	5	3	0	1	1	3	3	4	0	0	0
Grc38_ENST00000421685|lincRNA	1	0	1	0	1	1	0	1	3	0	1	1
Grc38_ENST00000421703|processed_transcript	4	9	2	0	1	0	1	1	3	0	0	1
Grc38_ENST00000421737|lincRNA	9	18	24	1	0	0	5	10	24	0	1	1
Grc38_ENST00000421931|lincRNA	5	3	5	0	0	0	0	0	2	0	1	0
Grc38_ENST00000421976|lincRNA	0	3	1	1	0	0	1	0	1	0	0	0
Grc38_ENST00000422118|lincRNA	0	2	2	0	1	0	3	4	5	0	0	1
Grc38_ENST00000422183|processed_transcript	2439	4497	3507	6	18	31	3538	4713	915	4	19	7
Grc38_ENST00000422207|processed_transcript	2603	4722	3118	0	2	6	3802	4659	1057	0	4	3
Grc38_ENST00000422374|lincRNA	2	4	6	1	0	1	3	8	2	0	0	1
Grc38_ENST00000422519|lincRNA	1	4	4	0	0	0	1	0	2	0	0	0
Grc38_ENST00000422661|lincRNA	3	1	3	0	0	1	0	0	2	1	2	1
Grc38_ENST00000422780|lincRNA	0	0	0	0	0	2	0	0	2	1	0	0
Grc38_ENST00000423208|lincRNA	2	0	4	0	0	0	0	2	2	0	0	0
Grc38_ENST00000423222|lincRNA	13	7	11	8	1	12	4	2	12	3	6	0
Grc38_ENST00000423323|processed_transcript	1	5	5	0	0	0	2	0	2	1	0	3
Grc38_ENST00000423403|lincRNA	2	4	4	0	1	1	0	1	3	0	0	0
Grc38_ENST00000423515|lincRNA	12	20	9	0	0	0	2	7	7	0	0	0
Grc38_ENST00000423918|processed_transcript	2	4	0	1	0	0	0	1	3	1	0	0
Grc38_ENST00000423943|lincRNA	3	0	0	3	18	10	0	0	1	1	15	0
Grc38_ENST00000424208|processed_transcript	1	3	3	0	0	0	4	1	2	0	0	0
Grc38_ENST00000424415|lincRNA	3	1	3	0	1	0	0	1	1	0	1	0
Grc38_ENST00000424496|sense_intronic	5	4	4	2	7	7	2	1	2	2	4	0
Grc38_ENST00000424516|sense_overlapping	0	3	0	1	1	3	0	0	1	1	1	0
Grc38_ENST00000424684|lincRNA	0	0	1	0	0	0	0	1	1	0	0	0
Grc38_ENST00000424850|lincRNA	5	5	0	0	0	0	1	1	1	0	0	0
Grc38_ENST00000424943|lincRNA	6	6	5	0	2	0	3	7	4	0	0	0
Grc38_ENST00000424982|sense_intronic	0	4	6	0	0	1	3	3	3	0	0	0
Grc38_ENST00000425170|processed_transcript	0	0	2	0	0	0	1	5	1	0	1	1
Grc38_ENST00000425211|processed_transcript	2	11	10	0	0	6	3	6	7	0	0	0
Grc38_ENST00000425296|sense_intronic	1	3	1	0	0	0	1	4	7	0	0	1
Grc38_ENST00000425388|lincRNA	1	4	2	0	0	1	0	1	3	0	0	0
Grc38_ENST00000425397|processed_transcript	0	4	0	0	0	0	4	3	3	0	0	0
Grc38_ENST00000425493|lincRNA	0	1	0	0	0	0	1	0	1	0	0	0
Grc38_ENST00000425648|processed_transcript	6	3	1	0	0	0	0	0	4	0	0	0
Grc38_ENST00000425800|lincRNA	1	1	0	2	1	0	1	3	0	0	1	0
Grc38_ENST00000426066|processed_transcript	3	5	4	3	3	0	3	4	4	0	4	0
Grc38_ENST00000426282|lincRNA	35	29	18	0	0	0	5	1	11	0	1	1
Grc38_ENST00000426283|lincRNA	4	5	1	0	0	2	2	3	6	0	0	0
Grc38_ENST00000426529|processed_transcript	1	2	2	1	0	0	0	2	2	0	0	0
Grc38_ENST00000426585|lincRNA	0	4	2	0	0	0	1	1	2	1	2	0
Grc38_ENST00000426635|lincRNA	3	2	0	0	0	0	2	3	0	0	0	0
Grc38_ENST00000426812|processed_transcript	3	1	2	0	0	0	0	1	2	2	0	0
Grc38_ENST00000426991|sense_intronic	1	2	1	0	0	0	3	1	2	0	0	0
Grc38_ENST00000427111|lincRNA	6	8	5	36	32	52	4	7	6	12	26	5
Grc38_ENST00000427161|lincRNA	439	185	213	1	8	3	57	10	174	6	0	7
Grc38_ENST00000427391|lincRNA	0	1	0	3	0	6	0	4	0	1	0	1
Grc38_ENST00000427501|processed_transcript	255	537	228	0	3	1	714	858	216	0	3	0
Grc38_ENST00000427804|lincRNA	5	0	0	0	1	0	0	0	2	1	0	0
Grc38_ENST00000427824|lincRNA	1	6	2	0	0	0	0	2	4	1	2	2
Grc38_ENST00000427831|processed_transcript	211	146	124	5	11	4	57	22	103	6	3	6
Grc38_ENST00000427872|lincRNA	2	19	2	0	0	0	1	5	4	0	0	0
Grc38_ENST00000428191|sense_intronic	3	4	1	0	0	0	1	6	3	0	0	0
Grc38_ENST00000428222|lincRNA	2	1	1	0	0	1	2	1	5	0	2	4
Grc38_ENST00000428647|lincRNA	12	22	11	1	3	2	11	13	17	0	8	2
Grc38_ENST00000428761|lincRNA	1	1	0	0	0	0	0	0	0	0	0	0
Grc38_ENST00000428833|processed_transcript	1	4	2	0	3	1	0	3	0	1	1	1
Grc38_ENST00000428891|sense_intronic	4	0	2	0	1	0	1	1	1	0	0	1
Grc38_ENST00000429010|lincRNA	1	1	1	2	0	0	1	2	1	0	0	0
Grc38_ENST00000429067|processed_transcript	0	2	0	0	1	0	2	0	5	0	0	0
Grc38_ENST00000429124|lincRNA	8	12	11	0	0	0	7	4	9	0	0	2
Grc38_ENST00000429137|lincRNA	0	1	0	0	0	0	0	0	0	0	0	0
Grc38_ENST00000429367|lincRNA	90	120	134	41	54	49	50	132	87	5	39	8
Grc38_ENST00000429464|lincRNA	9	6	8	0	0	0	7	1	4	0	0	1
Grc38_ENST00000429829|lincRNA	10	33	23	1	1	0	6	6	42	1	0	1
Grc38_ENST00000429953|lincRNA	2	1	0	0	0	0	0	1	2	0	0	0
Grc38_ENST00000429998|processed_transcript	6	17	12	9	11	9	5	8	14	0	11	2
Grc38_ENST00000430034|3prime_overlapping_ncrna	0	0	0	4	1	1	1	0	3	0	4	0
Grc38_ENST00000430050|lincRNA	0	4	0	0	0	0	1	2	1	1	0	0
Grc38_ENST00000430247|lincRNA	200	159	178	1	1	1	240	199	37	0	2	4
Grc38_ENST00000430429|lincRNA	4	8	32	0	0	0	1	1	45	0	0	0
Grc38_ENST00000430728|lincRNA	7	28	18	2	0	1	9	13	23	0	0	0
Grc38_ENST00000430766|lincRNA	36	24	27	0	0	0	0	0	10	0	0	0
Grc38_ENST00000430922|lincRNA	2	0	0	0	0	0	1	3	3	0	0	0
Grc38_ENST00000430998|lincRNA	5	5	4	0	0	0	0	1	2	0	0	0
Grc38_ENST00000431043|processed_transcript	10008	21643	17396	29	77	134	14457	21684	4176	23	64	25
Grc38_ENST00000431060|processed_transcript	2	1	4	0	2	1	3	0	1	0	4	3
Grc38_ENST00000431268|processed_transcript	5368	8832	5520	4	15	19	7778	8482	2394	2	22	8
Grc38_ENST00000431712|lincRNA	2	3	2	0	0	0	1	0	4	1	0	0
Grc38_ENST00000431737|lincRNA	1	0	0	0	0	0	0	0	0	0	0	0
Grc38_ENST00000431813|sense_intronic	2	5	3	1	1	0	1	0	3	0	0	0
Grc38_ENST00000431979|lincRNA	2	7	1	0	0	0	2	2	5	0	1	0
Grc38_ENST00000432045|lincRNA	12	13	6	4	0	0	12	8	8	1	2	0
Grc38_ENST00000432047|sense_intronic	1	2	2	1	0	0	2	1	0	0	0	0
Grc38_ENST00000432230|lincRNA	5	2	6	0	2	2	4	3	5	0	1	0
Grc38_ENST00000432330|lincRNA	0	2	0	0	0	0	0	2	3	0	0	0
Grc38_ENST00000432429|lincRNA	0	2	2	0	2	0	1	3	7	0	0	2
Grc38_ENST00000432438|lincRNA	4	7	8	0	0	0	0	0	4	0	0	0
Grc38_ENST00000432474|lincRNA	2	7	4	0	1	0	0	0	4	1	0	0
Grc38_ENST00000432536|processed_transcript	6	0	3	0	0	1	0	1	1	0	0	0
Grc38_ENST00000432668|processed_transcript	0	0	0	0	0	0	1	0	0	0	0	0
Grc38_ENST00000432783|lincRNA	1	3	2	0	0	0	1	4	4	0	0	0
Grc38_ENST00000432984|lincRNA	0	0	0	0	0	1	0	2	0	0	0	0
Grc38_ENST00000432988|processed_transcript	8	15	8	5	4	2	3	5	12	0	2	1
Grc38_ENST00000433082|processed_transcript	0	7	0	0	2	0	1	1	2	0	0	0
Grc38_ENST00000433116|lincRNA	7	5	12	1	2	3	5	4	7	3	1	0
Grc38_ENST00000433310|lincRNA	185	136	149	0	2	1	240	239	51	0	0	0
Grc38_ENST00000433510|lincRNA	18	6	13	0	0	0	4	1	5	0	0	0
Grc38_ENST00000433669|lincRNA	13	10	4	0	0	2	4	2	8	1	1	0
Grc38_ENST00000433673|lincRNA	7	6	6	0	0	0	1	3	4	0	1	1
Grc38_ENST00000433724|lincRNA	2	3	3	0	0	0	2	0	6	0	0	0
Grc38_ENST00000433843|processed_transcript	6	15	7	4	4	1	5	7	3	1	3	0
Grc38_ENST00000433856|lincRNA	3	3	3	0	0	0	2	2	1	0	1	0
Grc38_ENST00000434244|lincRNA	4	2	0	0	1	0	1	2	1	1	5	2
Grc38_ENST00000434540|lincRNA	0	0	0	0	6	2	0	0	1	0	3	0
Grc38_ENST00000434796|processed_transcript	2536	4683	3459	12	17	26	3658	4902	935	6	18	4
Grc38_ENST00000434859|lincRNA	0	8	1	0	0	0	3	0	1	0	1	0
Grc38_ENST00000434868|lincRNA	3	6	5	0	0	0	3	4	4	0	2	0
Grc38_ENST00000435311|lincRNA	0	2	1	0	0	2	0	1	2	0	0	0
Grc38_ENST00000435411|lincRNA	5	6	5	0	0	0	5	2	3	0	0	0
Grc38_ENST00000435597|lincRNA	5	4	2	0	1	0	1	8	6	1	4	0
Grc38_ENST00000436123|lincRNA	18	14	10	19	35	29	8	16	16	4	33	1
Grc38_ENST00000436200|processed_transcript	2	1	1	0	0	0	0	5	3	2	0	0
Grc38_ENST00000436416|sense_overlapping	3	4	0	0	1	0	1	0	2	0	0	1
Grc38_ENST00000436656|processed_transcript	436	928	470	1	0	2	869	1104	221	2	1	0
Grc38_ENST00000436742|processed_transcript	0	3	2	0	0	0	7	8	2	0	0	1
Grc38_ENST00000436786|lincRNA	8	9	6	4	2	3	2	0	4	0	3	0
Grc38_ENST00000436820|lincRNA	2	5	1	0	0	0	2	0	1	0	0	0
Grc38_ENST00000436932|lincRNA	5	3	1	0	0	2	1	0	2	0	0	1
Grc38_ENST00000437235|lincRNA	2	3	0	1	2	6	0	2	0	0	3	1
Grc38_ENST00000437681|sense_intronic	2370	4061	3622	19	37	39	1860	3035	2319	8	24	21
Grc38_ENST00000437716|processed_transcript	4	1	0	0	1	0	8	1	6	1	2	0
Grc38_ENST00000437730|lincRNA	1	3	1	0	0	0	0	1	1	0	0	0
Grc38_ENST00000437781|processed_transcript	2	1	1	1	0	0	2	2	3	2	0	0
Grc38_ENST00000437916|lincRNA	0	0	2	0	0	0	0	3	2	0	0	0
Grc38_ENST00000437920|lincRNA	2	4	4	0	0	1	2	1	5	0	0	0
Grc38_ENST00000438002|lincRNA	103	57	129	52	66	81	59	52	295	15	76	26
Grc38_ENST00000438107|lincRNA	2	5	4	0	1	2	2	3	3	2	0	0
Grc38_ENST00000438154|lincRNA	1	3	2	0	0	0	0	1	2	0	0	1
Grc38_ENST00000438368|lincRNA	0	0	1	0	0	0	0	4	0	0	0	0
Grc38_ENST00000438618|lincRNA	0	4	3	0	0	0	3	4	6	0	3	1
Grc38_ENST00000439004|lincRNA	0	5	2	1	0	0	2	5	11	0	0	0
Grc38_ENST00000439105|lincRNA	1	4	5	0	0	0	3	1	0	0	0	0
Grc38_ENST00000439670|processed_transcript	1	3	2	1	0	0	0	0	4	0	0	0
Grc38_ENST00000439898|lincRNA	6	5	5	1	0	1	5	7	6	0	1	0
Grc38_ENST00000439913|lincRNA	1	7	2	0	0	0	2	5	2	0	1	0
Grc38_ENST00000440088|lincRNA	0	4	1	0	0	1	1	3	5	0	2	0
Grc38_ENST00000440104|lincRNA	3	8	3	1	0	0	9	7	6	0	0	0
Grc38_ENST00000440408|lincRNA	2	4	3	0	0	4	0	4	4	0	1	0
Grc38_ENST00000440455|lincRNA	1	3	4	0	0	2	1	2	4	0	0	1
Grc38_ENST00000440496|lincRNA	0	3	2	2	0	0	0	0	0	0	0	0
Grc38_ENST00000440698|lincRNA	1	2	4	0	0	0	1	4	1	0	0	0
Grc38_ENST00000440762|lincRNA	1	0	0	0	0	0	0	0	0	0	0	0
Grc38_ENST00000440776|processed_transcript	3	5	1	1	0	1	2	2	1	0	0	0
Grc38_ENST00000441009|lincRNA	0	0	0	0	0	0	0	1	1	0	0	0
Grc38_ENST00000441052|lincRNA	0	4	0	1	2	0	1	1	6	0	2	2
Grc38_ENST00000441093|sense_overlapping	4	3	0	0	0	0	0	0	3	0	0	0
Grc38_ENST00000441095|lincRNA	7	27	5	0	2	1	8	9	17	0	2	1
Grc38_ENST00000441167|sense_intronic	17	5	10	2	1	0	2	0	10	0	0	0
Grc38_ENST00000441255|lincRNA	10	2	2	2	0	3	0	0	1	7	1	6
Grc38_ENST00000441272|lincRNA	7	2	3	0	1	0	1	5	4	0	0	0
Grc38_ENST00000441587|sense_intronic	1	3	0	0	0	0	0	1	2	0	0	0
Grc38_ENST00000441932|lincRNA	16	37	12	11	15	10	19	15	28	0	5	4
Grc38_ENST00000442067|processed_transcript	2953	5825	3692	2	5	8	4649	5904	1308	0	6	3
Grc38_ENST00000442116|lincRNA	1	15	15	3	2	2	3	6	9	0	2	0
Grc38_ENST00000442133|processed_transcript	0	2	1	0	0	1	2	0	4	0	0	1
Grc38_ENST00000442197|lincRNA	1	4	3	0	0	0	0	1	3	0	0	0
Grc38_ENST00000442318|lincRNA	2	3	0	0	2	0	0	1	5	0	0	2
Grc38_ENST00000442456|lincRNA	0	0	4	0	0	0	0	0	5	1	1	0
Grc38_ENST00000442712|lincRNA	8	12	4	0	0	0	3	1	8	0	1	0
Grc38_ENST00000443205|lincRNA	0	0	0	0	0	0	0	0	1	0	0	0
Grc38_ENST00000443243|lincRNA	2	1	0	0	0	0	2	0	1	0	0	0
Grc38_ENST00000443364|lincRNA	2	1	1	5	7	7	1	1	2	0	14	2
Grc38_ENST00000443554|lincRNA	3	4	0	0	0	1	1	0	1	0	0	0
Grc38_ENST00000443799|processed_transcript	9218	11437	8466	10	31	56	11782	12192	3782	8	34	11
Grc38_ENST00000443836|lincRNA	1	7	1	0	0	0	0	0	1	0	0	0
Grc38_ENST00000443926|lincRNA	0	1	0	0	0	0	0	0	1	0	0	0
Grc38_ENST00000444037|lincRNA	4	9	1	1	0	2	2	0	1	0	1	0
Grc38_ENST00000444042|lincRNA	0	3	2	0	0	2	5	2	4	0	1	0
Grc38_ENST00000444210|lincRNA	6	2	3	4	2	1	1	3	5	2	1	4
Grc38_ENST00000444431|processed_transcript	5	6	9	1	1	0	3	2	8	0	0	0
Grc38_ENST00000444470|processed_transcript	2574	4723	3229	0	4	4	3938	4854	1133	1	4	1
Grc38_ENST00000444482|lincRNA	0	0	0	0	0	1	0	1	1	0	0	0
Grc38_ENST00000445300|lincRNA	3	2	3	0	0	0	1	3	4	1	0	0
Grc38_ENST00000445332|lincRNA	21	12	9	1	1	0	2	2	13	0	0	0
Grc38_ENST00000445646|lincRNA	232	199	120	1	1	1	16	5	99	0	0	1
Grc38_ENST00000445770|lincRNA	1	3	3	1	0	2	5	3	12	0	2	0
Grc38_ENST00000445817|lincRNA	20	40	35	55	46	69	10	19	40	20	54	9
Grc38_ENST00000446159|processed_transcript	0	1	0	0	0	0	0	0	0	0	0	0
Grc38_ENST00000446358|lincRNA	4	3	5	0	0	0	0	0	0	0	0	0
Grc38_ENST00000446516|lincRNA	2	1	1	1	0	0	4	1	5	0	0	2
Grc38_ENST00000446754|lincRNA	4	21	9	1	0	0	5	11	17	2	1	1
Grc38_ENST00000446912|lincRNA	1	4	2	3	1	0	0	0	1	0	2	0
Grc38_ENST00000447198|lincRNA	0	1	5	0	0	0	0	0	5	0	0	0
Grc38_ENST00000447413|sense_overlapping	2	0	1	0	1	0	0	0	0	0	0	0
Grc38_ENST00000447478|lincRNA	0	0	1	0	0	0	0	0	0	0	0	0
Grc38_ENST00000447507|sense_intronic	6	1	0	0	0	0	1	1	1	0	0	0
Grc38_ENST00000447524|lincRNA	2	3	2	2	0	0	0	1	1	0	0	0
Grc38_ENST00000447577|processed_transcript	0	0	1	0	0	0	0	0	0	0	0	0
Grc38_ENST00000447643|lincRNA	0	5	0	0	1	0	0	1	4	0	0	0
Grc38_ENST00000447748|lincRNA	1	5	2	1	1	1	1	3	4	2	2	2
Grc38_ENST00000447785|lincRNA	5	9	1	0	0	0	1	6	6	0	4	1
Grc38_ENST00000447898|processed_transcript	0	2	3	0	0	0	1	3	4	0	1	0
Grc38_ENST00000447950|lincRNA	46	18	31	1	0	0	1	0	8	0	0	0
Grc38_ENST00000448179|lincRNA	1	0	0	0	1	0	0	0	0	0	0	0
Grc38_ENST00000448256|lincRNA	5	23	7	0	5	3	8	8	6	0	4	1
Grc38_ENST00000448494|lincRNA	4	2	2	5	0	0	3	11	10	0	2	0
Grc38_ENST00000448587|lincRNA	1	0	1	0	1	0	1	0	0	0	0	0
Grc38_ENST00000448901|lincRNA	1	2	1	0	0	0	0	1	2	0	0	0
Grc38_ENST00000448941|processed_transcript	2	3	0	1	0	0	0	0	3	0	0	0
Grc38_ENST00000448958|lincRNA	1	1	3	2	3	6	0	1	5	1	2	0
Grc38_ENST00000449259|lincRNA	1	3	3	0	1	0	0	1	3	1	0	1
Grc38_ENST00000449307|lincRNA	3	10	2	1	1	1	2	1	11	1	3	4
Grc38_ENST00000449316|lincRNA	4	3	2	0	0	0	2	2	1	0	1	0
Grc38_ENST00000449339|lincRNA	4	0	0	2	1	1	1	0	1	1	0	0
Grc38_ENST00000449573|sense_overlapping	5	20	10	4	1	5	4	7	8	2	7	2
Grc38_ENST00000449589|processed_transcript	466	815	578	0	2	1	586	727	230	0	2	2
Grc38_ENST00000449882|lincRNA	1	5	3	0	0	0	0	7	3	0	0	0
Grc38_ENST00000450709|processed_transcript	22	9	2	0	1	0	3	1	5	0	0	0
Grc38_ENST00000450804|lincRNA	2	2	1	0	0	0	0	4	2	1	0	0
Grc38_ENST00000450977|lincRNA	1	1	0	0	0	0	0	0	0	0	0	0
Grc38_ENST00000451289|lincRNA	0	2	2	0	0	0	1	0	1	0	0	0
Grc38_ENST00000451298|processed_transcript	2	2	0	0	3	1	0	4	4	0	1	0
Grc38_ENST00000451302|processed_transcript	0	1	1	0	1	0	0	0	1	0	0	0
Grc38_ENST00000451317|lincRNA	0	0	0	0	6	3	0	0	0	0	0	2
Grc38_ENST00000451355|sense_intronic	0	2	0	0	0	3	0	0	0	0	0	0
Grc38_ENST00000451400|lincRNA	5	11	3	0	0	0	6	5	8	0	0	0
Grc38_ENST00000451607|processed_transcript	16502	22929	21974	43	98	109	19798	32198	5028	37	99	56
Grc38_ENST00000451707|lincRNA	2	2	4	3	0	1	0	0	6	0	2	1
Grc38_ENST00000451762|processed_transcript	2	3	4	0	1	0	0	2	8	0	0	0
Grc38_ENST00000451905|lincRNA	1	1	3	0	0	0	0	2	0	1	0	0
Grc38_ENST00000451980|lincRNA	2	0	5	0	0	0	0	0	1	0	0	0
Grc38_ENST00000452120|lincRNA	6	8	4	0	0	2	2	1	9	0	0	0
Grc38_ENST00000452197|processed_transcript	1	0	2	0	2	1	1	3	0	0	0	0
Grc38_ENST00000452199|lincRNA	0	0	0	2	2	5	0	0	0	1	2	1
Grc38_ENST00000452320|processed_transcript	113	57	45	8	2	1	20	22	53	1	1	4
Grc38_ENST00000452354|lincRNA	0	0	1	0	0	0	0	0	1	0	0	0
Grc38_ENST00000452431|processed_transcript	17	29	13	4	4	8	20	31	28	0	9	0
Grc38_ENST00000452622|lincRNA	0	0	0	0	0	0	0	0	2	0	0	0
Grc38_ENST00000452623|processed_transcript	9	7	1	0	1	0	0	0	1	0	0	0
Grc38_ENST00000452643|lincRNA	0	1	4	0	0	0	0	1	2	0	0	0
Grc38_ENST00000452690|lincRNA	14	5	3	0	1	0	0	1	6	0	0	0
Grc38_ENST00000452787|lincRNA	6	5	1	0	0	0	2	0	1	0	0	0
Grc38_ENST00000452834|lincRNA	3	5	4	1	0	0	0	0	2	0	0	0
Grc38_ENST00000452840|lincRNA	1	3	1	0	0	0	0	0	3	0	0	0
Grc38_ENST00000452982|lincRNA	0	1	0	0	0	0	0	0	1	0	0	0
Grc38_ENST00000453082|processed_transcript	0	5	4	0	0	0	7	2	1	0	0	0
Grc38_ENST00000453159|processed_transcript	6	5	1	1	1	0	1	3	3	0	1	0
Grc38_ENST00000453209|processed_transcript	2	4	1	1	0	0	5	3	3	0	0	1
Grc38_ENST00000453420|lincRNA	3	8	4	0	2	1	5	8	13	0	0	1
Grc38_ENST00000453554|lincRNA	104	52	153	65	55	99	48	61	301	21	63	21
Grc38_ENST00000453754|processed_transcript	1	4	1	0	0	2	0	1	1	0	0	0
Grc38_ENST00000453784|lincRNA	16	34	18	1	1	0	20	38	35	2	3	0
Grc38_ENST00000453837|lincRNA	1	1	0	1	1	1	0	0	3	1	2	0
Grc38_ENST00000454068|processed_transcript	31	36	36	0	0	1	36	37	13	0	2	0
Grc38_ENST00000454224|lincRNA	12	18	14	1	1	3	9	27	26	1	0	1
Grc38_ENST00000454411|lincRNA	3	1	1	0	0	0	2	3	3	0	0	0
Grc38_ENST00000454596|lincRNA	6	17	9	3	0	1	5	11	21	2	1	0
Grc38_ENST00000454813|processed_transcript	2165	3007	1746	3	6	11	3373	3131	1037	3	9	2
Grc38_ENST00000454832|sense_intronic	3	7	4	0	0	0	3	4	2	0	0	1
Grc38_ENST00000454922|processed_transcript	0	1	1	0	3	0	0	0	0	0	0	0
Grc38_ENST00000454932|processed_transcript	2	4	1	0	0	0	0	6	4	0	0	0
Grc38_ENST00000454935|lincRNA	2	1	1	0	0	0	1	2	3	0	0	0
Grc38_ENST00000455336|sense_intronic	7	4	4	0	0	0	0	0	3	0	0	0
Grc38_ENST00000455531|lincRNA	1	5	2	0	0	0	0	2	7	0	0	0
Grc38_ENST00000455557|sense_overlapping	6	2	3	0	0	0	2	1	8	2	1	0
Grc38_ENST00000455929|sense_intronic	31	42	17	0	0	0	7	3	18	0	2	0
Grc38_ENST00000455945|processed_transcript	3	2	1	1	0	1	1	2	5	0	1	0
Grc38_ENST00000456100|processed_transcript	0	0	1	0	0	1	0	0	0	0	0	0
Grc38_ENST00000456105|lincRNA	3	20	6	22	20	16	1	9	18	9	24	5
Grc38_ENST00000456248|lincRNA	2	4	2	0	2	0	3	3	7	0	0	0
Grc38_ENST00000456265|lincRNA	8	13	6	1	1	0	11	13	12	1	0	0
Grc38_ENST00000456273|sense_intronic	5	12	7	0	0	0	5	11	2	0	1	0
Grc38_ENST00000456293|processed_transcript	8462	9814	7526	6	31	47	10299	10573	3229	8	38	12
Grc38_ENST00000456477|lincRNA	1	2	4	0	0	0	0	2	1	0	0	0
Grc38_ENST00000456576|processed_transcript	2	2	2	0	0	0	1	9	1	0	1	0
Grc38_ENST00000456601|processed_transcript	0	2	1	0	2	0	3	2	5	0	1	1
Grc38_ENST00000456627|lincRNA	1	9	3	0	1	0	1	2	9	0	0	1
Grc38_ENST00000456746|sense_overlapping	1	2	0	0	0	0	0	0	1	0	0	0
Grc38_ENST00000456782|sense_intronic	3	3	1	0	1	0	0	12	9	0	0	1
Grc38_ENST00000456812|processed_transcript	2476	4483	3506	5	15	31	3581	4665	879	4	22	7
Grc38_ENST00000456895|lincRNA	1	4	2	0	0	0	3	1	0	1	0	0
Grc38_ENST00000456917|lincRNA	3	0	0	0	3	0	0	3	0	0	0	0
Grc38_ENST00000457009|lincRNA	0	2	3	0	0	2	1	3	1	0	0	0
Grc38_ENST00000457025|processed_transcript	1	0	0	0	0	0	0	0	0	0	0	0
Grc38_ENST00000457033|processed_transcript	3	6	1	0	2	0	3	11	5	0	0	0
Grc38_ENST00000457321|lincRNA	0	3	3	0	1	1	0	5	3	0	0	1
Grc38_ENST00000457339|lincRNA	1	0	0	0	0	0	0	0	0	90	0	63
Grc38_ENST00000457348|lincRNA	2	3	0	0	0	0	0	2	0	0	0	0
Grc38_ENST00000458007|3prime_overlapping_ncrna	24	13	2	2	0	0	1	0	4	0	0	0
Grc38_ENST00000458220|processed_transcript	3	9	13	0	0	1	11	15	10	0	0	0
Grc38_ENST00000458392|lincRNA	6	3	5	0	0	1	2	3	2	0	0	0
Grc38_ENST00000458797|scaRNA	255	355	311	3	8	11	236	328	142	1	12	5
Grc38_ENST00000460249|processed_transcript	2788	5603	4169	5	14	17	3318	5645	1825	8	13	6
Grc38_ENST00000460754|sense_intronic	3	2	4	0	0	0	2	3	9	0	0	0
Grc38_ENST00000460977|sense_overlapping	4	4	1	0	0	0	1	0	3	0	0	0
Grc38_ENST00000462662|processed_transcript	1	0	4	0	0	0	0	1	6	0	0	0
Grc38_ENST00000462959|processed_transcript	1	3	2	0	0	1	0	1	1	0	0	0
Grc38_ENST00000463183|lincRNA	0	1	1	0	0	0	0	1	1	0	0	0
Grc38_ENST00000465215|lincRNA	4	0	3	0	0	0	1	1	1	0	0	0
Grc38_ENST00000465933|lincRNA	2	4	1	0	0	1	0	2	6	0	1	1
Grc38_ENST00000466430|lincRNA	4	3	5	0	1	0	1	2	2	0	0	0
Grc38_ENST00000468219|sense_intronic	2	1	0	0	0	0	3	2	3	0	0	2
Grc38_ENST00000471090|lincRNA	1	2	0	0	0	2	0	1	2	1	1	1
Grc38_ENST00000472120|lincRNA	6	7	10	0	1	0	0	0	6	0	0	0
Grc38_ENST00000472323|lincRNA	0	0	1	0	0	0	0	0	3	2	0	0
Grc38_ENST00000472367|processed_transcript	7	10	6	0	1	0	7	9	4	0	4	0
Grc38_ENST00000472655|lincRNA	3	4	2	0	0	0	0	1	0	0	0	0
Grc38_ENST00000473595|lincRNA	2	6	1	3	5	1	1	2	3	2	7	0
Grc38_ENST00000474045|lincRNA	1	1	1	0	0	0	0	0	3	0	0	0
Grc38_ENST00000476964|sense_overlapping	69	33	32	1	1	1	27	5	35	1	2	2
Grc38_ENST00000477392|lincRNA	0	0	1	0	1	2	0	1	4	1	0	0
Grc38_ENST00000478103|processed_transcript	2	8	7	0	1	0	8	3	10	0	2	0
Grc38_ENST00000478845|sense_intronic	0	2	2	0	0	0	0	2	6	0	0	0
Grc38_ENST00000480237|processed_transcript	19	2	3	0	0	0	1	0	3	0	1	0
Grc38_ENST00000480811|processed_transcript	1242	1494	1663	2	6	5	1535	1928	1045	4	4	6
Grc38_ENST00000481027|processed_transcript	4	12	7	3	2	4	5	10	11	0	4	0
Grc38_ENST00000481893|processed_transcript	0	1	0	0	1	2	0	0	4	0	1	1
Grc38_ENST00000482382|lincRNA	5	6	0	0	0	0	1	0	5	0	0	0
Grc38_ENST00000482787|lincRNA	1	4	1	0	0	0	1	1	0	0	0	0
Grc38_ENST00000482985|lincRNA	1	6	2	2	0	4	3	6	5	0	0	0
Grc38_ENST00000483140|processed_transcript	3	2	5	9	0	3	4	3	6	0	3	0
Grc38_ENST00000483544|lincRNA	1	0	0	0	2	0	0	0	1	0	0	0
Grc38_ENST00000483840|lincRNA	1	0	5	0	0	0	1	0	3	0	0	0
Grc38_ENST00000484076|lincRNA	2	4	1	0	0	0	0	1	2	0	0	0
Grc38_ENST00000484550|lincRNA	1	1	1	0	0	0	0	0	0	0	0	0
Grc38_ENST00000484698|lincRNA	1	6	3	1	2	5	2	1	7	0	1	0
Grc38_ENST00000484836|processed_transcript	6	16	9	1	0	0	6	7	10	1	4	1
Grc38_ENST00000484859|processed_transcript	14	10	8	0	0	1	2	1	8	0	0	0
Grc38_ENST00000484892|lincRNA	2	0	3	0	0	1	1	2	2	0	1	0
Grc38_ENST00000486571|lincRNA	1	5	0	0	0	0	2	2	4	0	0	0
Grc38_ENST00000488425|lincRNA	4	1	0	1	12	11	0	1	0	0	1	3
Grc38_ENST00000489090|lincRNA	9	12	7	0	0	0	3	1	2	0	0	0
Grc38_ENST00000489336|processed_transcript	0	3	2	0	2	1	0	1	3	0	1	1
Grc38_ENST00000489670|lincRNA	1	2	2	0	0	0	2	1	5	0	0	0
Grc38_ENST00000490357|lincRNA	2	12	10	0	1	0	3	12	9	0	0	1
Grc38_ENST00000491009|processed_transcript	2785	5591	4198	4	13	24	3528	5612	1900	3	15	9
Grc38_ENST00000491608|lincRNA	2	3	0	0	2	0	1	0	1	1	1	0
Grc38_ENST00000492250|processed_transcript	2860	5693	4115	5	16	15	3312	5780	1876	6	19	9
Grc38_ENST00000492337|sense_overlapping	59	44	35	3	4	0	32	9	35	1	2	2
Grc38_ENST00000492465|processed_transcript	0	0	0	0	0	0	0	0	1	0	0	0
Grc38_ENST00000492981|lincRNA	0	0	0	0	0	1	2	1	0	0	0	0
Grc38_ENST00000494270|processed_transcript	1	0	1	0	0	0	0	0	0	0	0	0
Grc38_ENST00000494582|lincRNA	3	4	3	1	4	8	2	1	2	0	1	2
Grc38_ENST00000496403|lincRNA	0	1	2	0	0	0	1	1	4	0	0	0
Grc38_ENST00000497248|processed_transcript	2	3	4	0	0	0	1	1	2	1	0	1
Grc38_ENST00000497774|processed_transcript	26572	33683	30969	73	205	213	32471	39008	11428	99	185	183
Grc38_ENST00000497988|sense_intronic	0	1	1	1	0	0	2	2	3	0	0	0
Grc38_ENST00000498032|lincRNA	15	7	10	1	1	4	1	0	3	0	3	0
Grc38_ENST00000498714|sense_intronic	1	3	4	1	0	0	4	3	1	0	0	0
Grc38_ENST00000498731|sense_overlapping	23	25	15	0	0	0	9	2	12	0	0	3
Grc38_ENST00000498967|lincRNA	7	8	10	9	6	8	10	14	10	5	9	8
Grc38_ENST00000499006|lincRNA	0	0	1	1	0	1	2	0	3	0	0	0
Grc38_ENST00000499025|lincRNA	2	2	0	0	0	0	1	1	3	0	0	0
Grc38_ENST00000499137|processed_transcript	6	5	6	5	1	0	2	9	5	0	1	2
Grc38_ENST00000499291|lincRNA	3	4	6	7	4	0	5	2	3	0	1	0
Grc38_ENST00000499418|lincRNA	2	3	3	0	2	0	1	1	2	0	0	1
Grc38_ENST00000499452|lincRNA	8	10	2	0	0	0	1	1	2	0	0	0
Grc38_ENST00000499499|lincRNA	32	7	17	6	8	5	9	11	4	0	5	0
Grc38_ENST00000499502|lincRNA	1	2	1	0	0	0	2	0	2	0	0	0
Grc38_ENST00000499521|processed_transcript	25	68	54	3	4	23	14	50	60	1	9	1
Grc38_ENST00000499732|lincRNA	11	6	7	0	1	0	6	21	19	0	1	1
Grc38_ENST00000499797|lincRNA	3778	4268	2585	1073	1507	1934	3190	4499	4459	384	1209	394
Grc38_ENST00000499809|lincRNA	0	3	0	0	0	0	3	3	3	0	0	1
Grc38_ENST00000500009|lincRNA	2	5	1	0	2	2	1	6	8	1	2	0
Grc38_ENST00000500016|lincRNA	1	0	0	2	0	3	0	1	3	1	2	0
Grc38_ENST00000500112|lincRNA	0	5	0	0	0	1	0	1	3	0	0	1
Grc38_ENST00000500197|lincRNA	3	2	1	0	0	0	0	0	4	0	0	0
Grc38_ENST00000500215|lincRNA	0	4	7	0	0	1	2	1	4	0	1	0
Grc38_ENST00000500698|lincRNA	11	5	8	2	0	0	1	3	3	2	1	0
Grc38_ENST00000500850|lincRNA	1	5	2	0	0	0	1	4	2	0	1	1
Grc38_ENST00000500853|processed_transcript	4	3	0	0	0	0	0	0	2	0	1	0
Grc38_ENST00000500941|lincRNA	2	3	0	0	0	1	2	2	4	0	0	1
Grc38_ENST00000500949|processed_transcript	29	61	46	7	6	2	25	10	24	3	5	0
Grc38_ENST00000501122|lincRNA	600	643	358	3	9	5	507	1931	1021	5	6	4
Grc38_ENST00000501143|lincRNA	1	1	1	13	6	14	1	1	6	8	14	8
Grc38_ENST00000501211|sense_intronic	18	17	16	0	1	0	3	5	14	0	0	0
Grc38_ENST00000501259|lincRNA	0	1	3	0	0	0	1	1	1	0	0	0
Grc38_ENST00000501499|lincRNA	0	3	1	0	3	0	0	0	4	0	0	0
Grc38_ENST00000501520|lincRNA	2	8	1	1	1	2	0	2	2	0	0	1
Grc38_ENST00000501541|lincRNA	22	1	0	0	1	0	8	14	0	0	0	0
Grc38_ENST00000501702|lincRNA	0	0	0	2	1	4	2	1	1	1	3	0
Grc38_ENST00000501708|lincRNA	53	37	12	2	4	0	3	4	28	0	6	0
Grc38_ENST00000501817|lincRNA	1	2	5	0	0	0	0	0	3	0	1	0
Grc38_ENST00000501855|lincRNA	0	0	0	1	3	3	0	1	0	0	0	0
Grc38_ENST00000501937|lincRNA	1	2	0	2	1	1	1	0	1	0	2	0
Grc38_ENST00000501965|lincRNA	3	5	1	0	0	0	3	0	3	0	0	1
Grc38_ENST00000502071|lincRNA	0	1	2	0	0	2	1	1	7	1	0	1
Grc38_ENST00000502162|lincRNA	0	0	1	2	1	3	0	1	0	0	0	0
Grc38_ENST00000502187|lincRNA	28	23	23	0	1	0	5	0	19	2	0	0
Grc38_ENST00000502221|lincRNA	19	12	19	0	0	0	2	2	7	0	2	3
Grc38_ENST00000502390|lincRNA	0	10	2	0	0	1	2	5	3	0	0	0
Grc38_ENST00000502417|lincRNA	0	8	0	0	0	0	1	5	3	0	0	0
Grc38_ENST00000502421|lincRNA	0	3	0	1	2	1	2	2	1	0	1	0
Grc38_ENST00000502479|lincRNA	12	13	5	0	1	0	4	11	11	0	1	1
Grc38_ENST00000502934|lincRNA	2	3	1	0	0	0	1	3	2	0	0	0
Grc38_ENST00000503051|lincRNA	1	1	2	6	3	20	0	0	0	0	5	0
Grc38_ENST00000503695|lincRNA	7	7	1	4	0	0	6	3	1	0	2	0
Grc38_ENST00000503723|sense_intronic	11	6	8	0	0	0	2	0	6	0	0	0
Grc38_ENST00000503882|lincRNA	0	14	10	0	0	0	7	10	9	0	0	0
Grc38_ENST00000503985|lincRNA	3	2	2	0	1	0	1	0	0	0	0	1
Grc38_ENST00000503991|scaRNA	567	626	441	3	9	10	536	928	149	14	3	8
Grc38_ENST00000504082|lincRNA	29	31	31	42	38	78	13	39	36	19	35	6
Grc38_ENST00000504184|lincRNA	5	2	4	1	2	0	0	1	4	0	2	0
Grc38_ENST00000504409|lincRNA	5	2	2	0	0	0	2	2	3	0	1	0
Grc38_ENST00000504876|lincRNA	0	1	0	1	1	0	0	1	3	0	0	0
Grc38_ENST00000505089|lincRNA	60	134	72	4	13	7	66	113	144	8	16	7
Grc38_ENST00000505109|lincRNA	4	2	3	0	0	0	0	0	0	0	0	1
Grc38_ENST00000505289|lincRNA	1	0	0	0	1	2	0	3	0	0	0	0
Grc38_ENST00000505556|lincRNA	0	1	4	0	0	5	1	5	3	1	5	2
Grc38_ENST00000505642|processed_transcript	1	3	1	0	0	0	1	1	2	0	0	0
Grc38_ENST00000505668|sense_intronic	9	11	5	1	1	0	4	3	7	1	4	1
Grc38_ENST00000505807|processed_transcript	4	4	2	0	0	0	1	4	7	0	1	0
Grc38_ENST00000505870|lincRNA	1	3	1	0	0	0	0	0	1	0	0	0
Grc38_ENST00000506090|lincRNA	2	2	2	0	0	1	1	1	2	0	0	0
Grc38_ENST00000506222|lincRNA	2	2	1	0	1	0	2	4	1	0	0	0
Grc38_ENST00000506299|lincRNA	4	2	1	0	0	0	0	1	2	1	1	1
Grc38_ENST00000506305|lincRNA	5	2	4	1	1	0	4	8	6	0	0	0
Grc38_ENST00000506314|processed_transcript	3	2	1	0	0	0	1	0	6	0	0	0
Grc38_ENST00000506655|lincRNA	4	1	0	0	0	0	0	0	3	1	0	0
Grc38_ENST00000506723|lincRNA	2	4	3	0	1	2	0	4	4	1	1	0
Grc38_ENST00000506950|sense_intronic	1	1	1	0	0	0	1	1	0	0	0	0
Grc38_ENST00000507031|lincRNA	4	7	6	1	2	5	3	6	12	0	3	1
Grc38_ENST00000507296|lincRNA	0	1	0	0	0	0	0	0	0	0	0	0
Grc38_ENST00000507311|lincRNA	3	2	4	1	1	0	0	2	1	0	0	0
Grc38_ENST00000507313|lincRNA	3	1	3	0	0	0	2	2	3	0	1	0
Grc38_ENST00000507365|lincRNA	1	4	0	0	0	2	0	1	0	0	0	0
Grc38_ENST00000507770|sense_intronic	6	11	9	0	0	0	4	6	7	0	0	0
Grc38_ENST00000507938|sense_overlapping	9	7	5	5	1	1	2	2	8	1	3	1
Grc38_ENST00000508096|sense_overlapping	2	3	1	0	1	2	0	2	3	1	4	3
Grc38_ENST00000508106|lincRNA	4	8	4	0	3	0	3	3	8	0	0	0
Grc38_ENST00000508202|lincRNA	6	7	7	0	2	2	7	11	13	1	5	1
Grc38_ENST00000508309|lincRNA	0	0	0	1	2	1	0	0	1	0	0	0
Grc38_ENST00000508313|lincRNA	0	2	1	0	0	3	1	1	3	0	0	0
Grc38_ENST00000508406|processed_transcript	0	1	0	3	3	1	0	0	0	0	2	0
Grc38_ENST00000508713|sense_intronic	7	15	6	0	1	1	5	20	16	1	2	5
Grc38_ENST00000508827|lincRNA	0	2	0	0	0	0	1	0	1	0	0	0
Grc38_ENST00000508832|lincRNA	147	213	211	4	2	5	135	254	252	0	3	2
Grc38_ENST00000508969|processed_transcript	4	3	3	0	0	0	0	0	5	0	0	1
Grc38_ENST00000509015|lincRNA	0	1	3	0	0	3	2	1	1	0	0	0
Grc38_ENST00000509506|lincRNA	2	5	1	0	0	0	1	0	4	0	1	0
Grc38_ENST00000509654|lincRNA	3	6	3	0	0	0	5	12	18	1	1	0
Grc38_ENST00000509921|lincRNA	0	1	0	1	1	1	0	0	0	0	0	0
Grc38_ENST00000509964|lincRNA	16	7	3	0	0	0	0	1	1	0	0	0
Grc38_ENST00000509983|lincRNA	0	1	0	0	0	0	0	0	0	0	0	0
Grc38_ENST00000510371|lincRNA	2	8	3	0	0	2	0	3	9	2	0	0
Grc38_ENST00000510444|lincRNA	3	6	3	0	0	1	1	0	10	0	0	1
Grc38_ENST00000510505|lincRNA	17	51	18	2	0	0	32	41	53	0	0	2
Grc38_ENST00000510767|processed_transcript	8	6	7	2	0	2	8	2	8	0	1	1
Grc38_ENST00000510879|lincRNA	1	0	0	0	0	0	0	0	0	0	0	0
Grc38_ENST00000510907|lincRNA	3	3	0	0	0	0	1	1	0	0	0	0
Grc38_ENST00000511014|lincRNA	1	1	0	1	0	2	0	0	3	0	0	0
Grc38_ENST00000511219|lincRNA	0	2	0	0	0	0	0	4	2	1	0	0
Grc38_ENST00000511602|lincRNA	1	4	2	0	0	0	0	0	1	0	0	0
Grc38_ENST00000511677|lincRNA	1	2	0	0	0	1	2	2	2	0	0	0
Grc38_ENST00000511699|processed_transcript	4	2	2	0	0	0	0	0	1	0	0	0
Grc38_ENST00000511821|lincRNA	88	160	95	153	170	290	78	88	190	46	203	54
Grc38_ENST00000511893|sense_overlapping	0	1	1	3	1	1	0	0	0	2	1	0
Grc38_ENST00000512241|lincRNA	5	4	5	3	0	0	1	0	5	0	0	0
Grc38_ENST00000512519|lincRNA	0	2	0	0	0	0	1	0	3	0	0	0
Grc38_ENST00000512559|lincRNA	2	1	6	2	0	1	3	2	4	0	1	0
Grc38_ENST00000512652|lincRNA	1	0	0	0	0	0	0	0	0	0	0	0
Grc38_ENST00000512693|lincRNA	0	1	3	0	0	0	4	5	7	0	0	1
Grc38_ENST00000512873|lincRNA	2	2	4	0	0	0	1	7	4	1	0	0
Grc38_ENST00000513207|lincRNA	3	4	1	0	0	0	0	0	2	0	0	0
Grc38_ENST00000513358|lincRNA	0	0	1	3	1	9	1	2	2	0	1	1
Grc38_ENST00000513393|lincRNA	0	1	1	0	0	0	1	0	7	1	1	0
Grc38_ENST00000513626|lincRNA	3	2	2	0	0	0	2	3	4	0	0	0
Grc38_ENST00000513875|lincRNA	0	0	0	0	0	0	0	0	0	1	0	0
Grc38_ENST00000513955|lincRNA	2	0	1	0	2	0	5	0	2	1	7	0
Grc38_ENST00000514298|processed_transcript	2	2	0	0	0	0	1	3	1	0	0	0
Grc38_ENST00000514519|lincRNA	9	17	19	13	18	12	14	24	27	10	11	14
Grc38_ENST00000514532|lincRNA	0	0	0	0	0	0	1	0	1	0	0	0
Grc38_ENST00000514568|lincRNA	1	2	0	0	1	2	1	3	2	0	0	0
Grc38_ENST00000514726|lincRNA	1	4	2	0	1	4	1	0	2	1	0	1
Grc38_ENST00000514752|processed_transcript	0	8	0	0	0	0	2	3	8	0	0	0
Grc38_ENST00000514823|lincRNA	1	3	1	0	0	0	0	1	2	0	0	0
Grc38_ENST00000515031|lincRNA	10	11	8	0	1	1	6	11	10	0	0	0
Grc38_ENST00000515329|processed_transcript	113	105	51	5	7	3	41	8	75	3	1	6
Grc38_ENST00000515343|lincRNA	9	16	11	0	3	0	17	12	13	0	1	1
Grc38_ENST00000515416|lincRNA	2	0	2	2	2	0	0	3	1	0	1	1
Grc38_ENST00000515614|lincRNA	4	5	1	0	1	0	1	1	1	0	0	0
Grc38_ENST00000515670|lincRNA	0	0	0	0	0	0	1	0	0	0	0	0
Grc38_ENST00000515924|scaRNA	14	50	27	0	2	3	27	38	19	2	0	2
Grc38_ENST00000515981|scaRNA	12	31	22	1	3	1	22	28	17	1	3	4
Grc38_ENST00000516060|scaRNA	28	63	28	0	1	0	28	36	49	0	0	0
Grc38_ENST00000516089|scaRNA	91	157	132	6	8	4	161	171	81	1	2	6
Grc38_ENST00000516330|scaRNA	12	20	15	0	1	0	13	16	6	0	0	1
Grc38_ENST00000516672|scaRNA	70	110	103	1	4	2	71	83	58	1	3	1
Grc38_ENST00000516768|scaRNA	1630	1156	852	15	31	33	1548	1654	320	13	29	29
Grc38_ENST00000516869|ribozyme	2633	4107	3078	543	719	949	2322	2421	2013	245	456	359
Grc38_ENST00000516881|scaRNA	4	15	18	1	0	0	11	14	5	0	0	0
Grc38_ENST00000516903|scaRNA	11	23	11	0	1	0	9	19	15	2	0	0
Grc38_ENST00000517026|scaRNA	9	8	9	1	0	0	8	7	3	0	0	0
Grc38_ENST00000517097|scaRNA	28	66	49	0	0	2	45	65	32	0	1	1
Grc38_ENST00000517138|scaRNA	50	135	61	0	2	0	53	88	65	0	0	0
Grc38_ENST00000517681|lincRNA	2	7	3	0	0	0	2	1	7	0	0	0
Grc38_ENST00000517739|lincRNA	5	5	3	0	0	0	0	0	1	1	0	0
Grc38_ENST00000517848|lincRNA	3	6	1	0	0	0	3	0	1	1	0	0
Grc38_ENST00000517961|lincRNA	74	285	213	10	19	32	146	174	326	4	12	3
Grc38_ENST00000518014|lincRNA	2	1	0	1	0	0	0	3	7	0	0	1
Grc38_ENST00000518103|lincRNA	1	2	1	0	0	0	1	5	3	0	1	0
Grc38_ENST00000518190|lincRNA	1	0	2	0	0	0	2	2	1	0	0	0
Grc38_ENST00000519366|lincRNA	2	1	1	0	0	0	0	0	1	0	0	0
Grc38_ENST00000519550|lincRNA	2	8	4	0	1	0	1	0	3	0	0	0
Grc38_ENST00000519692|processed_transcript	2	4	1	0	1	0	1	0	3	0	1	0
Grc38_ENST00000519840|lincRNA	1	4	0	1	0	0	0	1	1	0	0	0
Grc38_ENST00000519990|lincRNA	0	0	0	0	0	0	0	0	1	0	0	0
Grc38_ENST00000520259|lincRNA	3	4	0	0	0	0	0	1	4	0	0	0
Grc38_ENST00000520515|processed_transcript	2	4	0	0	2	0	4	3	4	0	1	0
Grc38_ENST00000520619|processed_transcript	3	1	4	1	4	2	0	4	3	1	0	0
Grc38_ENST00000520815|sense_intronic	0	2	16	0	0	0	0	0	20	0	0	0
Grc38_ENST00000520902|lincRNA	1	5	2	0	1	1	3	2	2	0	0	0
Grc38_ENST00000520944|processed_transcript	2	3	2	0	1	2	0	1	3	1	0	1
Grc38_ENST00000521051|lincRNA	0	3	0	0	0	1	0	0	1	0	0	0
Grc38_ENST00000521074|lincRNA	4	2	0	0	0	3	1	0	1	1	1	1
Grc38_ENST00000521127|processed_transcript	2362	4705	3517	3	12	8	3431	4756	1319	1	6	4
Grc38_ENST00000521128|lincRNA	3	6	2	1	1	2	0	1	5	0	2	1
Grc38_ENST00000521218|lincRNA	2	3	0	0	0	0	2	1	1	0	0	0
Grc38_ENST00000521369|lincRNA	5	0	1	0	0	0	2	3	0	0	0	0
Grc38_ENST00000521725|lincRNA	0	1	0	2	1	5	0	0	0	0	3	1
Grc38_ENST00000521908|lincRNA	4	5	2	1	1	1	1	1	1	1	4	0
Grc38_ENST00000522158|lincRNA	3	5	4	0	1	0	1	1	3	0	1	0
Grc38_ENST00000522547|sense_intronic	1	2	3	4	1	0	0	0	0	0	0	2
Grc38_ENST00000522604|lincRNA	0	0	0	0	0	0	0	2	0	0	0	0
Grc38_ENST00000522771|lincRNA	6	3	6	0	4	2	0	0	2	0	2	0
Grc38_ENST00000522778|lincRNA	7	14	12	0	0	0	4	12	23	0	0	1
Grc38_ENST00000523103|lincRNA	22	54	52	22	23	21	36	38	57	10	28	16
Grc38_ENST00000523671|lincRNA	1	3	3	0	0	1	2	2	2	0	0	0
Grc38_ENST00000523792|lincRNA	1	1	0	0	0	0	0	3	2	3	0	0
Grc38_ENST00000523871|lincRNA	3	7	4	3	5	3	5	8	4	2	3	5
Grc38_ENST00000524287|lincRNA	2	1	2	0	1	0	0	0	2	1	0	0
Grc38_ENST00000524348|sense_intronic	1	4	3	0	0	0	1	7	5	0	0	0
Grc38_ENST00000524376|sense_overlapping	3	1	5	1	1	0	1	1	2	0	1	0
Grc38_ENST00000525043|lincRNA	2	2	0	0	1	0	1	0	1	0	0	3
Grc38_ENST00000525556|lincRNA	4	3	0	2	1	0	0	1	3	0	0	0
Grc38_ENST00000525757|lincRNA	2	2	2	0	0	2	0	1	2	0	0	0
Grc38_ENST00000526036|lincRNA	2	4	1	0	0	0	0	4	2	0	0	0
Grc38_ENST00000526091|lincRNA	13	8	3	0	0	0	0	0	2	0	0	0
Grc38_ENST00000526131|lincRNA	1	1	5	0	0	1	2	1	6	1	1	0
Grc38_ENST00000526470|lincRNA	0	1	0	0	2	0	1	2	8	0	0	0
Grc38_ENST00000527332|lincRNA	13	13	12	0	0	0	3	0	9	0	0	0
Grc38_ENST00000527474|lincRNA	0	0	1	1	4	3	1	0	1	1	7	1
Grc38_ENST00000527550|sense_overlapping	18	18	31	1	0	2	6	0	19	0	0	1
Grc38_ENST00000527970|lincRNA	0	2	0	0	0	0	0	0	0	0	0	0
Grc38_ENST00000528133|sense_overlapping	0	2	2	1	2	1	1	2	2	0	0	0
Grc38_ENST00000528233|sense_intronic	1	1	2	0	0	0	0	0	2	0	0	0
Grc38_ENST00000528381|lincRNA	0	3	0	0	1	1	1	1	1	2	5	1
Grc38_ENST00000528804|processed_transcript	1	1	1	0	1	0	2	0	2	0	0	0
Grc38_ENST00000528986|sense_overlapping	2	4	1	0	0	1	0	2	3	0	0	0
Grc38_ENST00000529089|processed_transcript	0	4	2	1	0	1	2	3	0	0	0	0
Grc38_ENST00000529733|lincRNA	2	0	2	3	3	1	0	1	1	1	4	1
Grc38_ENST00000529743|lincRNA	1	1	3	0	0	0	1	1	1	0	0	0
Grc38_ENST00000529823|sense_overlapping	1	0	2	0	0	2	0	3	1	0	1	0
Grc38_ENST00000529841|lincRNA	1	2	0	1	0	1	0	0	3	1	0	0
Grc38_ENST00000529902|lincRNA	1	2	0	1	1	1	2	2	6	0	0	1
Grc38_ENST00000530000|lincRNA	4	3	2	0	0	0	3	3	8	0	0	0
Grc38_ENST00000530079|processed_transcript	2	2	1	0	0	1	3	5	2	0	3	0
Grc38_ENST00000530595|sense_overlapping	1	1	0	1	1	1	1	5	5	0	1	1
Grc38_ENST00000531381|sense_overlapping	0	1	3	0	1	1	0	0	3	0	2	0
Grc38_ENST00000531559|lincRNA	4	4	2	0	0	0	3	5	2	0	0	0
Grc38_ENST00000531609|lincRNA	3	3	2	0	0	1	0	1	0	0	1	0
Grc38_ENST00000531894|processed_transcript	1	1	3	1	0	1	3	8	3	0	3	0
Grc38_ENST00000532109|lincRNA	0	1	0	0	0	0	0	0	0	0	0	0
Grc38_ENST00000532619|lincRNA	29	12	21	2	3	2	7	2	27	0	0	0
Grc38_ENST00000532768|lincRNA	0	4	0	0	0	0	3	1	2	0	1	0
Grc38_ENST00000533004|lincRNA	2	4	1	4	0	0	0	1	2	1	2	2
Grc38_ENST00000533615|lincRNA	1	1	2	0	0	0	0	2	1	1	0	0
Grc38_ENST00000533736|lincRNA	0	2	2	1	0	0	0	2	1	0	0	0
Grc38_ENST00000533812|lincRNA	5	8	7	1	1	1	2	2	4	1	0	3
Grc38_ENST00000533859|sense_intronic	1	1	0	0	2	0	0	0	1	0	0	0
Grc38_ENST00000534336|lincRNA	817	1169	891	30	58	48	659	1541	1557	28	39	25
Grc38_ENST00000534593|lincRNA	10	7	1	0	0	0	0	0	1	1	0	0
Grc38_ENST00000534909|lincRNA	4	4	2	2	2	4	3	1	5	2	1	0
Grc38_ENST00000535076|processed_transcript	3744	6296	4934	8	10	13	5206	6293	3426	4	8	4
Grc38_ENST00000535487|lincRNA	0	1	0	0	0	0	0	0	1	1	0	0
Grc38_ENST00000535689|processed_transcript	3	3	9	0	0	0	2	5	4	0	0	0
Grc38_ENST00000536898|lincRNA	1	1	1	0	0	0	4	2	2	0	0	0
Grc38_ENST00000537024|processed_transcript	1858	2695	2271	4	7	7	2305	2499	646	2	11	6
Grc38_ENST00000537616|sense_intronic	1	6	8	0	1	0	4	2	3	0	0	0
Grc38_ENST00000537827|lincRNA	0	1	0	0	0	0	0	1	3	0	0	0
Grc38_ENST00000537925|processed_transcript	1251	2879	2417	0	7	7	1396	2401	471	2	5	2
Grc38_ENST00000537961|lincRNA	2	4	0	0	0	0	1	0	3	0	0	0
Grc38_ENST00000537965|processed_transcript	3723	5798	4119	5	15	19	4846	5015	1265	6	13	5
Grc38_ENST00000538077|lincRNA	2	4	5	0	3	4	0	5	9	0	0	1
Grc38_ENST00000538654|processed_transcript	41020	60919	48501	124	263	331	41195	53974	12393	77	272	115
Grc38_ENST00000539163|processed_transcript	1	3	1	0	0	1	1	2	7	0	2	3
Grc38_ENST00000539813|lincRNA	2	3	2	0	1	0	2	1	2	4	1	3
Grc38_ENST00000540725|processed_transcript	1233	2831	2443	3	9	5	1424	2352	449	4	2	2
Grc38_ENST00000540802|processed_transcript	13	13	4	0	0	0	3	2	3	0	0	0
Grc38_ENST00000540865|processed_transcript	3216	3898	4397	4	25	37	2912	4497	2009	9	34	12
Grc38_ENST00000540866|processed_transcript	21	9	4	5	3	10	0	1	12	3	6	5
Grc38_ENST00000540904|processed_transcript	3778	5773	4185	7	3	15	4818	5038	1258	1	11	5
Grc38_ENST00000541416|processed_transcript	1225	2886	2412	2	3	3	1344	2412	449	3	8	3
Grc38_ENST00000541782|sense_intronic	78	149	128	2	11	2	78	134	78	2	5	0
Grc38_ENST00000542089|lincRNA	0	1	2	0	0	0	3	2	0	0	0	0
Grc38_ENST00000542475|lincRNA	2	2	3	0	0	0	1	0	2	0	1	0
Grc38_ENST00000542763|lincRNA	20	22	18	1	1	1	6	2	14	2	1	2
Grc38_ENST00000543308|lincRNA	2	1	1	0	0	0	0	1	3	0	3	0
Grc38_ENST00000543334|lincRNA	0	1	1	0	0	0	0	0	0	0	0	0
Grc38_ENST00000544420|lincRNA	0	3	2	3	4	5	0	1	2	0	2	1
Grc38_ENST00000544550|processed_transcript	204	464	331	4	5	5	217	251	194	2	4	1
Grc38_ENST00000544868|lincRNA	21	28	15	1	0	1	17	52	47	0	1	0
Grc38_ENST00000544983|processed_transcript	5059	8656	6507	5	18	27	6242	7420	1681	2	24	5
Grc38_ENST00000545177|lincRNA	0	8	0	0	0	0	1	4	2	1	1	0
Grc38_ENST00000545308|processed_transcript	722	1153	973	5	6	6	979	1075	371	1	3	5
Grc38_ENST00000545688|processed_transcript	12	37	18	0	0	0	14	15	17	0	0	0
Grc38_ENST00000545709|sense_intronic	2	4	2	0	0	0	0	0	2	0	1	1
Grc38_ENST00000545920|processed_transcript	1857	2776	2349	3	10	8	2380	2526	607	6	9	4
Grc38_ENST00000546682|processed_transcript	0	2	7	0	0	0	0	2	5	0	0	0
Grc38_ENST00000546696|lincRNA	0	4	2	0	0	0	3	3	8	0	0	0
Grc38_ENST00000546835|lincRNA	0	1	0	0	0	0	0	0	0	0	0	0
Grc38_ENST00000547033|lincRNA	0	2	1	0	0	0	1	0	2	0	0	0
Grc38_ENST00000547179|lincRNA	2	4	0	1	1	0	3	1	6	0	0	0
Grc38_ENST00000547717|processed_transcript	7	21	17	13	16	16	6	14	19	1	14	7
Grc38_ENST00000547804|lincRNA	1	2	0	0	0	2	0	0	0	0	0	0
Grc38_ENST00000547876|lincRNA	6	2	0	0	0	0	1	0	1	0	0	0
Grc38_ENST00000548144|processed_transcript	3	0	0	0	0	0	2	1	2	0	0	0
Grc38_ENST00000548266|lincRNA	0	1	0	3	1	3	0	1	1	1	1	1
Grc38_ENST00000548801|sense_intronic	14	5	2	0	2	2	1	4	1	0	0	0
Grc38_ENST00000549262|lincRNA	3	5	2	0	0	0	0	1	0	0	0	0
Grc38_ENST00000549303|sense_intronic	4	5	4	0	0	0	1	5	2	0	0	1
Grc38_ENST00000549734|lincRNA	1	2	2	3	0	0	0	0	2	0	1	2
Grc38_ENST00000549796|lincRNA	4	4	2	1	0	2	1	1	1	0	0	0
Grc38_ENST00000549804|processed_transcript	5000	7645	5959	22	54	89	6514	6576	1601	38	55	39
Grc38_ENST00000550135|processed_transcript	1	1	2	0	0	0	3	0	3	0	1	0
Grc38_ENST00000550231|processed_transcript	1	4	0	0	3	2	0	2	1	0	0	0
Grc38_ENST00000550268|lincRNA	15	19	11	1	2	0	9	13	19	0	0	0
Grc38_ENST00000550279|lincRNA	3	4	3	0	0	0	0	0	3	1	0	0
Grc38_ENST00000550290|lincRNA	4	4	3	0	0	0	2	2	3	1	1	2
Grc38_ENST00000550723|lincRNA	5	12	10	5	10	5	6	13	16	7	12	19
Grc38_ENST00000551361|processed_transcript	37	39	21	0	0	1	43	42	14	1	1	0
Grc38_ENST00000551631|processed_transcript	15	45	29	3	3	5	46	37	25	0	2	0
Grc38_ENST00000552015|lincRNA	2	5	2	1	2	0	1	1	2	0	0	0
Grc38_ENST00000552061|sense_intronic	3	8	4	0	2	1	2	1	4	0	2	2
Grc38_ENST00000552334|lincRNA	0	1	4	0	2	1	0	1	2	0	0	0
Grc38_ENST00000553176|sense_overlapping	3	4	3	0	0	0	1	0	3	0	1	0
Grc38_ENST00000553181|lincRNA	3	2	5	0	0	0	0	0	6	0	0	0
Grc38_ENST00000553312|sense_overlapping	1	3	0	1	1	2	0	0	0	1	0	1
Grc38_ENST00000553344|lincRNA	6	7	3	5	9	3	5	7	5	1	3	0
Grc38_ENST00000553378|lincRNA	0	2	1	0	1	0	1	0	2	0	0	0
Grc38_ENST00000553465|lincRNA	38	48	38	0	0	4	44	25	17	0	1	0
Grc38_ENST00000553648|lincRNA	4	1	3	0	1	3	2	2	9	1	0	1
Grc38_ENST00000553679|lincRNA	11	13	4	0	0	0	1	1	14	0	1	1
Grc38_ENST00000553704|lincRNA	0	5	1	0	0	0	0	0	4	0	0	0
Grc38_ENST00000554129|lincRNA	1	0	0	0	0	2	2	2	2	0	1	0
Grc38_ENST00000554133|processed_transcript	5	8	11	0	0	1	2	5	11	0	4	1
Grc38_ENST00000554333|lincRNA	49	27	33	0	0	1	1	1	19	0	0	0
Grc38_ENST00000554519|lincRNA	3	1	1	0	0	0	1	3	4	0	0	0
Grc38_ENST00000554693|lincRNA	5833	6226	3946	5	16	30	6412	5597	1438	5	13	12
Grc38_ENST00000554753|lincRNA	0	1	0	0	0	0	0	0	0	0	0	0
Grc38_ENST00000554926|lincRNA	8	8	6	0	0	0	0	0	7	0	0	0
Grc38_ENST00000555004|lincRNA	15	16	15	0	0	1	6	7	13	0	0	0
Grc38_ENST00000555227|processed_transcript	3	4	1	0	0	0	2	7	3	1	1	0
Grc38_ENST00000555282|lincRNA	0	0	1	0	0	0	0	0	1	0	0	0
Grc38_ENST00000555379|processed_transcript	14	7	4	0	0	0	4	4	2	1	1	0
Grc38_ENST00000555396|lincRNA	5	7	5	0	2	0	5	15	17	1	0	0
Grc38_ENST00000555520|processed_transcript	2	4	4	0	0	0	7	3	1	0	0	0
Grc38_ENST00000555539|lincRNA	1	3	0	0	1	0	1	4	6	0	1	0
Grc38_ENST00000555871|lincRNA	1	4	1	1	0	0	0	1	1	0	0	0
Grc38_ENST00000555937|processed_transcript	9	6	3	0	2	1	4	8	0	0	0	0
Grc38_ENST00000555985|lincRNA	0	1	0	0	0	0	0	0	1	0	0	0
Grc38_ENST00000556053|lincRNA	3	3	2	0	0	2	0	4	3	0	0	0
Grc38_ENST00000556072|lincRNA	0	0	2	0	2	4	1	1	4	0	1	0
Grc38_ENST00000556355|processed_transcript	2	3	5	0	0	0	3	1	2	0	0	0
Grc38_ENST00000556405|lincRNA	0	1	2	0	0	1	1	3	2	0	2	0
Grc38_ENST00000556586|lincRNA	0	1	0	0	0	0	0	0	0	0	0	0
Grc38_ENST00000556720|lincRNA	2	5	1	2	0	2	0	0	1	0	2	0
Grc38_ENST00000556728|lincRNA	1	2	1	0	0	0	2	1	1	0	0	0
Grc38_ENST00000556738|lincRNA	2	2	2	0	1	0	2	2	0	0	2	0
Grc38_ENST00000556895|processed_transcript	0	1	1	1	0	1	1	3	2	0	3	0
Grc38_ENST00000556899|lincRNA	0	1	0	0	0	0	0	0	0	0	0	0
Grc38_ENST00000556913|lincRNA	10	12	4	0	0	0	3	1	9	0	1	0
Grc38_ENST00000557067|lincRNA	2	1	0	0	0	0	0	0	3	0	0	0
Grc38_ENST00000557108|processed_transcript	27	45	34	1	2	3	48	41	22	5	1	1
Grc38_ENST00000557359|lincRNA	0	1	0	0	0	0	0	0	0	0	0	0
Grc38_ENST00000557481|lincRNA	1	2	3	0	0	0	1	3	4	0	0	0
Grc38_ENST00000557526|lincRNA	5	10	8	1	0	0	6	0	1	0	1	1
Grc38_ENST00000557528|lincRNA	11	6	2	0	0	0	0	0	7	0	0	0
Grc38_ENST00000557682|processed_transcript	4	10	5	8	0	3	2	11	9	0	1	0
Grc38_ENST00000557800|sense_intronic	1	3	2	0	0	0	3	1	1	0	0	0
Grc38_ENST00000557910|lincRNA	0	5	1	0	0	1	1	2	1	0	0	0
Grc38_ENST00000558085|lincRNA	0	0	0	0	0	3	0	0	0	0	0	0
Grc38_ENST00000558097|lincRNA	1	2	1	0	0	0	0	1	1	0	0	0
Grc38_ENST00000558277|lincRNA	13	26	13	1	1	2	7	14	26	1	0	1
Grc38_ENST00000558675|lincRNA	4162	4672	2831	1172	1576	2084	3544	4942	5251	466	1330	387
Grc38_ENST00000558963|lincRNA	2	5	1	0	0	0	1	0	0	0	0	0
Grc38_ENST00000559008|lincRNA	0	2	1	0	1	0	1	2	1	0	0	0
Grc38_ENST00000559030|lincRNA	28	37	28	31	41	42	6	16	30	9	26	6
Grc38_ENST00000559298|lincRNA	6	8	5	2	0	2	6	13	8	0	0	0
Grc38_ENST00000559458|3prime_overlapping_ncrna	4	1	2	0	0	0	2	1	4	0	0	0
Grc38_ENST00000559825|lincRNA	2	0	4	0	0	2	1	1	5	0	0	3
Grc38_ENST00000559985|lincRNA	2	8	5	0	2	2	2	2	6	0	0	1
Grc38_ENST00000560049|lincRNA	1	0	0	2	2	1	0	0	1	1	0	0
Grc38_ENST00000560153|lincRNA	1	0	0	0	0	0	0	1	1	0	0	0
Grc38_ENST00000560378|sense_intronic	4	7	2	0	0	0	2	3	3	0	0	1
Grc38_ENST00000560400|sense_overlapping	3	9	2	1	0	0	2	7	3	0	1	0
Grc38_ENST00000560705|lincRNA	2	0	1	0	0	0	0	0	2	1	0	0
Grc38_ENST00000560732|lincRNA	1	0	1	0	0	1	2	3	5	0	1	0
Grc38_ENST00000560750|lincRNA	0	0	0	1	0	2	0	0	1	1	0	0
Grc38_ENST00000561054|lincRNA	0	1	0	0	0	0	0	0	0	0	0	0
Grc38_ENST00000561232|lincRNA	2	10	7	2	0	1	10	7	8	0	1	1
Grc38_ENST00000561320|lincRNA	57	126	98	9	14	7	66	132	158	2	8	3
Grc38_ENST00000561358|lincRNA	6	6	7	1	0	1	5	11	6	0	0	0
Grc38_ENST00000561473|lincRNA	1	1	0	0	1	0	0	2	0	0	0	0
Grc38_ENST00000561507|sense_overlapping	1	0	0	0	0	0	2	2	1	0	0	0
Grc38_ENST00000561521|lincRNA	1	3	4	0	0	0	0	2	4	0	0	0
Grc38_ENST00000561542|sense_overlapping	4	5	2	0	1	1	1	0	3	0	1	0
Grc38_ENST00000561587|lincRNA	1	4	1	0	0	0	2	2	2	0	0	1
Grc38_ENST00000561622|3prime_overlapping_ncrna	5	11	14	0	0	0	9	12	10	0	0	0
Grc38_ENST00000561624|sense_intronic	1	1	4	0	1	0	3	3	2	1	1	2
Grc38_ENST00000561652|sense_overlapping	2	4	0	0	1	3	1	5	5	0	0	0
Grc38_ENST00000561746|lincRNA	4	5	2	0	1	2	2	2	3	0	1	0
Grc38_ENST00000561788|processed_transcript	3	6	0	0	0	0	1	3	4	0	0	0
Grc38_ENST00000561847|sense_intronic	5	5	2	0	1	0	2	3	6	0	0	0
Grc38_ENST00000561926|lincRNA	4	7	4	2	2	0	1	2	2	0	0	0
Grc38_ENST00000561961|sense_overlapping	0	3	2	0	0	0	0	2	2	0	0	1
Grc38_ENST00000561978|lincRNA	3	6	6	0	2	1	17	5	6	0	1	0
Grc38_ENST00000562063|lincRNA	39	22	9	0	1	0	4	1	5	2	0	1
Grc38_ENST00000562082|sense_overlapping	1	3	5	0	0	0	2	1	1	0	0	1
Grc38_ENST00000562127|lincRNA	26	7	7	5	3	9	0	0	2	0	10	1
Grc38_ENST00000562167|lincRNA	1	0	0	0	0	0	0	0	1	0	0	0
Grc38_ENST00000562182|lincRNA	1	4	0	0	0	0	1	12	10	0	0	0
Grc38_ENST00000562242|sense_overlapping	5	1	3	0	0	0	0	1	0	0	1	0
Grc38_ENST00000562262|sense_intronic	0	1	3	2	0	0	1	0	2	0	0	0
Grc38_ENST00000562284|sense_overlapping	6	4	10	0	0	0	2	1	3	0	0	0
Grc38_ENST00000562328|sense_overlapping	0	1	0	0	0	2	0	1	3	0	0	0
Grc38_ENST00000562409|sense_intronic	23	19	10	1	2	0	5	3	11	1	1	0
Grc38_ENST00000562466|lincRNA	0	0	0	0	0	0	0	0	1	0	0	0
Grc38_ENST00000562471|lincRNA	3	4	1	0	1	0	0	1	2	1	2	0
Grc38_ENST00000562493|lincRNA	0	5	2	0	2	0	1	3	7	0	0	0
Grc38_ENST00000562582|lincRNA	0	3	0	0	2	0	0	1	2	0	0	0
Grc38_ENST00000562624|lincRNA	0	2	0	0	0	0	2	1	5	0	1	0
Grc38_ENST00000562644|sense_intronic	3	7	2	8	4	0	2	0	1	0	5	1
Grc38_ENST00000562691|sense_overlapping	8	9	8	0	0	0	5	11	11	0	1	1
Grc38_ENST00000562795|lincRNA	5	2	1	0	1	1	1	0	2	0	0	0
Grc38_ENST00000562796|lincRNA	0	0	1	0	0	0	2	0	3	1	0	0
Grc38_ENST00000562894|sense_intronic	2	1	2	0	0	0	5	1	4	0	0	0
Grc38_ENST00000562904|lincRNA	1	1	0	0	0	0	0	0	0	0	0	0
Grc38_ENST00000562917|lincRNA	23	45	23	1	2	2	16	37	38	3	0	2
Grc38_ENST00000562921|lincRNA	1	1	4	0	0	0	1	2	1	0	1	0
Grc38_ENST00000562952|sense_overlapping	44	55	31	2	1	0	30	45	66	1	3	1
Grc38_ENST00000563079|lincRNA	0	0	0	0	0	0	2	0	4	0	0	0
Grc38_ENST00000563103|sense_intronic	54	57	36	28	27	40	92	88	53	10	37	14
Grc38_ENST00000563129|3prime_overlapping_ncrna	2	3	2	0	0	0	0	2	3	0	0	0
Grc38_ENST00000563151|lincRNA	28	68	40	175	223	333	51	56	54	38	143	49
Grc38_ENST00000563225|lincRNA	0	3	2	0	1	0	0	4	1	0	0	0
Grc38_ENST00000563357|lincRNA	18	9	5	1	0	0	1	0	5	1	0	0
Grc38_ENST00000563417|lincRNA	1	7	4	0	0	0	3	6	6	0	0	1
Grc38_ENST00000563424|lincRNA	1	5	1	0	0	0	0	0	3	0	0	0
Grc38_ENST00000563495|sense_intronic	2	3	6	2	2	0	1	6	8	0	0	1
Grc38_ENST00000563631|lincRNA	1	1	1	0	0	0	2	3	0	0	0	0
Grc38_ENST00000563635|processed_transcript	4	7	6	6	8	5	6	8	6	2	3	0
Grc38_ENST00000563701|lincRNA	1	4	1	0	2	0	1	0	2	1	0	0
Grc38_ENST00000563727|lincRNA	6	3	4	0	0	0	2	0	0	0	0	0
Grc38_ENST00000563931|lincRNA	192	73	72	2	0	2	44	23	56	3	4	2
Grc38_ENST00000564014|lincRNA	2	5	1	0	2	0	1	3	3	0	0	0
Grc38_ENST00000564121|lincRNA	6	7	1	1	5	1	2	2	6	0	1	2
Grc38_ENST00000564237|sense_overlapping	0	4	4	1	0	0	3	3	4	0	0	0
Grc38_ENST00000564305|lincRNA	3	12	6	0	1	0	3	3	5	0	0	0
Grc38_ENST00000564352|sense_overlapping	0	1	1	0	0	2	0	4	7	0	0	1
Grc38_ENST00000564363|lincRNA	17	1	1	0	0	0	0	0	0	0	0	0
Grc38_ENST00000564401|lincRNA	10	7	7	0	0	4	4	7	13	0	0	0
Grc38_ENST00000564402|lincRNA	1	0	1	0	0	0	0	1	2	0	0	0
Grc38_ENST00000564460|sense_intronic	7	5	4	1	0	1	0	1	3	0	1	0
Grc38_ENST00000564536|processed_transcript	0	3	0	0	0	0	1	3	4	0	0	0
Grc38_ENST00000564585|lincRNA	23	19	9	3	3	5	1	2	11	2	2	5
Grc38_ENST00000564593|lincRNA	0	2	1	0	0	0	0	0	1	0	0	0
Grc38_ENST00000564619|lincRNA	1	2	0	0	0	0	0	0	0	0	0	0
Grc38_ENST00000564623|sense_overlapping	6	6	5	0	0	0	2	3	4	0	0	1
Grc38_ENST00000564681|lincRNA	0	0	1	0	0	0	0	0	2	0	0	0
Grc38_ENST00000564771|sense_overlapping	2	3	2	0	0	0	2	0	1	0	0	0
Grc38_ENST00000564834|lincRNA	0	1	0	0	0	0	1	0	0	0	0	0
Grc38_ENST00000564956|sense_overlapping	0	0	1	0	0	0	0	0	0	0	0	0
Grc38_ENST00000565008|lincRNA	2	0	0	0	0	0	3	0	3	0	0	0
Grc38_ENST00000565058|sense_intronic	7	16	7	2	2	3	5	0	4	3	0	0
Grc38_ENST00000565082|lincRNA	3	4	0	0	0	0	1	0	0	0	0	0
Grc38_ENST00000565113|processed_transcript	1	14	8	5	3	0	0	15	16	1	10	0
Grc38_ENST00000565181|lincRNA	1	2	0	8	3	0	0	0	3	2	5	3
Grc38_ENST00000565189|lincRNA	3	4	3	0	0	0	4	2	3	0	0	0
Grc38_ENST00000565336|lincRNA	6	8	9	1	0	7	12	18	15	1	5	0
Grc38_ENST00000565467|lincRNA	1	4	1	1	7	5	0	2	1	1	7	5
Grc38_ENST00000565493|lincRNA	29	96	57	13	7	19	27	79	99	7	12	1
Grc38_ENST00000565521|processed_transcript	2	3	2	1	1	0	2	2	2	0	1	0
Grc38_ENST00000565549|lincRNA	0	1	0	0	0	0	0	0	1	0	0	0
Grc38_ENST00000565617|lincRNA	5	3	1	0	0	3	1	4	4	0	3	0
Grc38_ENST00000566193|lincRNA	3	0	2	0	0	0	0	1	3	0	0	0
Grc38_ENST00000566225|lincRNA	0	2	1	0	0	0	0	1	2	0	0	0
Grc38_ENST00000566291|sense_overlapping	6	4	3	0	1	1	2	3	6	0	1	1
Grc38_ENST00000566293|sense_overlapping	0	1	0	0	1	0	0	1	2	0	0	0
Grc38_ENST00000566385|lincRNA	7	7	6	2	2	0	6	2	2	0	1	1
Grc38_ENST00000566440|lincRNA	0	3	2	0	0	0	0	3	1	0	1	1
Grc38_ENST00000566551|lincRNA	5	8	6	0	1	1	1	5	4	1	3	0
Grc38_ENST00000566639|sense_intronic	1	0	0	0	0	0	0	0	0	0	0	0
Grc38_ENST00000566733|lincRNA	10	10	4	0	0	2	5	0	2	0	0	0
Grc38_ENST00000566747|sense_overlapping	5	1	0	0	1	0	2	2	4	2	2	0
Grc38_ENST00000566929|lincRNA	3	0	5	1	1	0	3	4	9	0	1	0
Grc38_ENST00000566954|sense_overlapping	0	1	0	0	0	0	0	0	0	0	0	0
Grc38_ENST00000566996|3prime_overlapping_ncrna	3	3	0	1	0	0	0	5	6	0	0	0
Grc38_ENST00000567058|lincRNA	1	2	0	0	2	2	2	1	2	1	0	2
Grc38_ENST00000567102|sense_overlapping	0	2	3	0	0	0	1	1	1	0	0	0
Grc38_ENST00000567359|sense_intronic	7	3	2	0	0	0	1	2	3	1	0	0
Grc38_ENST00000567465|lincRNA	3	5	3	0	1	1	0	1	3	0	0	1
Grc38_ENST00000567488|lincRNA	37	47	31	0	2	0	21	32	41	0	1	0
Grc38_ENST00000567527|lincRNA	1879	3180	2405	11	27	34	2805	2326	752	17	19	9
Grc38_ENST00000567540|lincRNA	1	3	4	0	0	0	2	2	0	0	1	0
Grc38_ENST00000567714|sense_overlapping	3	0	0	0	0	0	2	4	0	0	0	0
Grc38_ENST00000567718|lincRNA	0	0	0	0	0	0	1	0	2	0	0	0
Grc38_ENST00000567769|lincRNA	15	37	26	0	2	0	14	21	30	4	1	2
Grc38_ENST00000567795|sense_intronic	0	5	2	0	0	0	1	0	4	0	0	0
Grc38_ENST00000567801|lincRNA	0	0	1	0	1	0	0	1	2	2	0	0
Grc38_ENST00000567834|3prime_overlapping_ncrna	1	1	1	2	0	0	1	4	3	1	0	0
Grc38_ENST00000567904|lincRNA	4	4	5	0	1	0	1	2	4	0	1	1
Grc38_ENST00000567953|sense_intronic	1	1	1	1	0	0	0	0	1	1	0	4
Grc38_ENST00000568031|lincRNA	0	1	1	0	0	0	0	3	4	0	0	0
Grc38_ENST00000568063|lincRNA	4	6	8	0	1	0	0	0	4	0	0	0
Grc38_ENST00000568144|sense_intronic	4	6	2	0	0	0	1	1	0	0	0	0
Grc38_ENST00000568248|lincRNA	0	6	2	0	0	0	3	2	2	0	0	0
Grc38_ENST00000568262|sense_intronic	2	5	1	0	0	0	1	1	1	0	1	0
Grc38_ENST00000568279|lincRNA	0	2	0	0	0	0	2	0	2	0	0	0
Grc38_ENST00000568314|sense_intronic	73	99	80	35	39	46	102	121	97	5	41	12
Grc38_ENST00000568389|lincRNA	10	11	3	0	0	0	0	0	5	0	0	0
Grc38_ENST00000568394|lincRNA	1	1	1	4	10	6	0	1	4	2	8	1
Grc38_ENST00000568395|processed_transcript	2	1	4	0	0	0	0	1	4	0	0	0
Grc38_ENST00000568418|lincRNA	3	2	2	0	0	0	3	0	1	0	0	0
Grc38_ENST00000568421|sense_overlapping	5	3	0	1	1	0	1	3	3	0	0	0
Grc38_ENST00000568479|sense_overlapping	0	1	0	0	0	0	2	2	2	0	0	0
Grc38_ENST00000568587|lincRNA	0	0	0	0	0	0	0	0	1	0	0	0
Grc38_ENST00000568695|lincRNA	2	0	0	1	0	0	0	2	6	0	2	2
Grc38_ENST00000568885|sense_intronic	140	86	63	1	3	2	35	4	37	2	3	2
Grc38_ENST00000568911|lincRNA	6	3	5	0	0	2	0	5	10	0	1	3
Grc38_ENST00000568966|sense_overlapping	1	1	0	0	0	0	0	1	0	0	0	0
Grc38_ENST00000569008|lincRNA	0	0	0	0	0	0	0	1	1	0	0	0
Grc38_ENST00000569034|sense_overlapping	1	4	0	0	0	3	3	2	3	2	0	0
Grc38_ENST00000569048|lincRNA	5	2	1	2	1	0	1	0	0	0	0	0
Grc38_ENST00000569087|lincRNA	9	5	1	2	0	0	4	6	4	1	0	0
Grc38_ENST00000569104|lincRNA	4	8	5	0	0	0	8	5	3	0	0	0
Grc38_ENST00000569134|lincRNA	0	0	0	0	0	0	2	4	0	0	0	0
Grc38_ENST00000569215|lincRNA	1	5	2	0	0	0	2	1	2	0	0	0
Grc38_ENST00000569275|lincRNA	1	0	0	0	0	0	0	0	0	0	0	0
Grc38_ENST00000569381|lincRNA	0	1	3	0	0	0	0	0	1	0	0	0
Grc38_ENST00000569425|lincRNA	3	3	0	0	0	0	2	1	0	0	1	0
Grc38_ENST00000569460|lincRNA	0	1	3	0	0	0	0	0	1	0	0	0
Grc38_ENST00000569476|lincRNA	2	1	1	1	0	0	0	0	1	0	0	0
Grc38_ENST00000569621|lincRNA	2	3	2	0	1	2	2	3	2	0	0	0
Grc38_ENST00000569736|lincRNA	1	0	0	0	0	0	0	0	0	0	0	0
Grc38_ENST00000569832|processed_transcript	11	14	17	24	32	27	6	8	24	7	26	13
Grc38_ENST00000569833|lincRNA	1	3	1	0	0	0	0	4	1	1	0	1
Grc38_ENST00000569835|lincRNA	3	2	0	0	0	0	1	3	0	0	0	0
Grc38_ENST00000569908|lincRNA	0	0	0	0	0	1	4	6	4	0	0	0
Grc38_ENST00000569913|lincRNA	1	0	0	0	0	0	0	0	0	0	0	0
Grc38_ENST00000569932|lincRNA	0	2	1	0	0	0	0	2	3	0	0	0
Grc38_ENST00000569966|lincRNA	6	2	1	0	0	0	0	1	0	0	0	0
Grc38_ENST00000569969|processed_transcript	0	1	1	0	0	0	0	2	2	1	0	0
Grc38_ENST00000569998|lincRNA	6	9	8	0	1	2	8	10	14	3	0	0
Grc38_ENST00000570073|sense_intronic	1	3	3	0	1	0	0	0	5	0	0	1
Grc38_ENST00000570082|lincRNA	4	1	1	1	0	0	1	2	2	0	0	0
Grc38_ENST00000570130|lincRNA	0	0	2	1	0	0	1	1	4	0	1	1
Grc38_ENST00000570140|sense_overlapping	2	3	2	0	0	0	2	2	1	0	0	0
Grc38_ENST00000570269|lincRNA	2	8	5	0	1	0	0	2	4	0	0	1
Grc38_ENST00000570416|lincRNA	1	0	0	0	0	0	0	0	0	0	0	0
Grc38_ENST00000570809|lincRNA	3	5	2	0	0	0	2	2	3	0	0	0
Grc38_ENST00000570843|lincRNA	817	410	413	935	1455	1248	320	495	2143	286	1068	298
Grc38_ENST00000571152|lincRNA	2	3	1	1	0	0	1	3	2	1	1	0
Grc38_ENST00000571302|sense_overlapping	3	5	1	0	0	1	2	0	2	0	0	1
Grc38_ENST00000571595|lincRNA	0	1	0	0	0	0	0	0	1	0	0	0
Grc38_ENST00000571619|lincRNA	2	0	1	0	0	0	1	2	0	0	0	0
Grc38_ENST00000571975|sense_overlapping	303	239	272	8	11	2	128	21	208	14	4	19
Grc38_ENST00000572165|processed_transcript	0	1	0	0	0	0	0	0	0	0	0	0
Grc38_ENST00000572877|sense_intronic	5	3	5	2	0	0	1	0	6	3	0	1
Grc38_ENST00000573042|lincRNA	1	2	1	0	0	0	1	2	3	0	0	0
Grc38_ENST00000573063|processed_transcript	1	0	0	5	1	0	0	3	0	0	0	0
Grc38_ENST00000573075|lincRNA	0	0	1	0	0	0	0	0	0	0	0	0
Grc38_ENST00000573127|lincRNA	0	1	0	0	0	0	0	1	0	0	0	0
Grc38_ENST00000573167|lincRNA	0	2	0	5	0	0	0	0	1	0	0	0
Grc38_ENST00000573259|processed_transcript	1393	2841	2197	27	52	57	1769	2222	1727	89	82	127
Grc38_ENST00000573457|processed_transcript	1279	2935	2297	35	56	77	1787	2309	1791	97	103	115
Grc38_ENST00000573479|lincRNA	8	36	23	82	60	78	7	21	18	12	43	10
Grc38_ENST00000574016|lincRNA	0	1	0	0	0	0	0	0	0	0	0	0
Grc38_ENST00000574306|lincRNA	13	4	2	0	1	0	4	6	4	0	0	0
Grc38_ENST00000574526|lincRNA	0	2	0	0	0	1	0	1	2	1	1	2
Grc38_ENST00000574616|3prime_overlapping_ncrna	49	61	38	7	5	6	33	30	61	3	4	1
Grc38_ENST00000574724|processed_transcript	2	4	1	0	1	0	1	1	3	0	0	0
Grc38_ENST00000574846|processed_transcript	1334	2947	2221	32	54	57	1755	2358	1813	81	98	133
Grc38_ENST00000575226|processed_transcript	1307	2989	2224	36	54	51	1750	2282	1794	92	84	128
Grc38_ENST00000575305|processed_transcript	0	1	1	0	0	5	0	0	4	1	1	1
Grc38_ENST00000575331|processed_transcript	1	1	2	0	0	0	0	0	2	1	0	0
Grc38_ENST00000575446|lincRNA	0	4	0	0	0	0	2	9	1	0	0	0
Grc38_ENST00000575743|processed_transcript	0	2	0	0	0	0	0	0	0	0	0	0
Grc38_ENST00000575766|processed_transcript	1326	2881	2244	28	48	40	1778	2231	1764	93	91	123
Grc38_ENST00000576096|processed_transcript	1375	2916	2349	29	54	59	1809	2342	1736	85	69	128
Grc38_ENST00000576365|lincRNA	8	7	3	0	0	0	2	4	2	1	0	0
Grc38_ENST00000576410|processed_transcript	1301	3005	2245	28	50	70	1756	2352	1764	85	78	117
Grc38_ENST00000576489|lincRNA	0	0	1	0	0	0	0	1	0	0	0	0
Grc38_ENST00000576702|processed_transcript	1342	2984	2328	34	54	65	1774	2168	1776	85	88	127
Grc38_ENST00000576738|lincRNA	1	0	0	0	1	0	0	0	1	0	0	0
Grc38_ENST00000576749|lincRNA	3	4	0	0	1	0	1	1	0	0	2	0
Grc38_ENST00000576963|lincRNA	2	2	1	0	0	1	0	0	2	0	0	0
Grc38_ENST00000577066|lincRNA	1	1	2	1	1	4	0	0	2	0	2	0
Grc38_ENST00000577087|lincRNA	1	2	3	2	0	0	0	0	2	0	0	0
Grc38_ENST00000577122|processed_transcript	1357	2958	2373	28	49	54	1824	2309	1823	81	90	113
Grc38_ENST00000577267|lincRNA	5	4	3	0	0	0	3	2	6	0	0	0
Grc38_ENST00000577309|lincRNA	0	1	0	0	0	7	0	3	1	0	0	0
Grc38_ENST00000577346|lincRNA	9	8	8	1	6	3	5	6	3	2	3	1
Grc38_ENST00000577439|lincRNA	2	2	2	1	0	0	0	0	4	0	0	0
Grc38_ENST00000577684|lincRNA	0	0	0	3	2	1	1	0	0	0	0	0
Grc38_ENST00000577700|lincRNA	148	237	224	0	1	0	169	226	102	0	0	0
Grc38_ENST00000577956|lincRNA	1	9	5	0	0	0	3	5	6	0	0	0
Grc38_ENST00000578152|lincRNA	14	2	4	0	0	0	1	3	11	0	1	0
Grc38_ENST00000578214|sense_intronic	2	5	2	0	0	0	2	5	7	0	0	0
Grc38_ENST00000578216|sense_intronic	1	5	5	1	1	0	0	2	6	0	1	1
Grc38_ENST00000578427|lincRNA	14	17	9	2	0	0	9	21	26	0	0	2
Grc38_ENST00000578492|processed_transcript	7	15	15	5	4	2	8	9	20	0	5	0
Grc38_ENST00000578539|sense_intronic	0	2	1	0	0	0	0	1	5	1	0	0
Grc38_ENST00000578585|lincRNA	17	67	32	1	2	2	5	23	61	0	0	2
Grc38_ENST00000578757|processed_transcript	24866	31185	29579	62	158	183	30776	36082	10311	107	191	152
Grc38_ENST00000578899|processed_transcript	0	1	1	0	0	2	0	0	0	0	0	0
Grc38_ENST00000579049|sense_intronic	0	1	0	0	0	0	0	0	0	0	0	0
Grc38_ENST00000579057|lincRNA	0	0	4	0	0	0	0	2	5	0	0	0
Grc38_ENST00000579126|processed_transcript	4	9	8	0	6	9	4	4	7	2	3	0
Grc38_ENST00000579174|processed_transcript	0	0	0	0	0	0	1	0	1	0	0	0
Grc38_ENST00000579188|sense_intronic	0	2	5	0	0	0	0	1	2	0	0	0
Grc38_ENST00000579458|lincRNA	1	3	0	0	0	0	1	1	2	0	0	0
Grc38_ENST00000579781|lincRNA	0	1	1	0	0	0	0	0	3	0	0	0
Grc38_ENST00000579833|lincRNA	1	4	0	0	0	0	2	0	0	0	0	0
Grc38_ENST00000579933|lincRNA	10	20	15	31	24	54	6	9	16	6	24	5
Grc38_ENST00000580134|lincRNA	3	7	8	0	3	2	5	3	4	0	3	0
Grc38_ENST00000580180|processed_transcript	3	1	2	2	0	1	1	4	1	1	4	0
Grc38_ENST00000580197|lincRNA	0	4	0	2	0	3	0	2	4	0	0	0
Grc38_ENST00000580282|lincRNA	8	11	9	1	2	1	3	8	10	1	0	4
Grc38_ENST00000580659|lincRNA	1	0	1	0	0	0	1	1	1	0	0	0
Grc38_ENST00000580891|sense_intronic	4	6	5	0	0	0	0	0	3	0	1	0
Grc38_ENST00000580975|sense_intronic	3	0	0	0	0	0	0	3	1	0	0	0
Grc38_ENST00000580979|sense_intronic	2	5	3	0	1	0	0	4	2	0	0	0
Grc38_ENST00000581011|processed_transcript	1	3	1	0	0	0	2	3	2	0	0	0
Grc38_ENST00000581170|lincRNA	11	16	26	32	26	43	9	13	20	6	27	4
Grc38_ENST00000581489|lincRNA	9	8	6	0	1	0	1	1	7	1	0	1
Grc38_ENST00000581549|lincRNA	0	2	0	0	0	0	2	0	0	0	0	0
Grc38_ENST00000581712|sense_intronic	4	2	1	4	0	1	0	6	3	0	0	0
Grc38_ENST00000581719|processed_transcript	4	2	1	0	0	0	0	0	3	0	1	0
Grc38_ENST00000581794|processed_transcript	3	1	0	0	1	0	1	4	10	0	0	0
Grc38_ENST00000581862|processed_transcript	0	1	0	0	0	0	0	0	2	0	0	0
Grc38_ENST00000581913|processed_transcript	6	8	8	0	1	4	9	11	8	0	3	1
Grc38_ENST00000581915|processed_transcript	4	5	4	1	0	0	1	1	6	0	0	0
Grc38_ENST00000582080|sense_intronic	11	8	8	0	0	1	0	2	4	0	0	0
Grc38_ENST00000582251|lincRNA	1	1	0	1	0	2	0	0	1	0	0	0
Grc38_ENST00000582320|lincRNA	0	1	4	1	0	0	0	0	1	0	0	0
Grc38_ENST00000582452|lincRNA	0	2	1	1	0	0	0	4	6	1	2	0
Grc38_ENST00000582866|lincRNA	15	13	7	10	6	2	3	5	13	1	5	3
Grc38_ENST00000582911|processed_transcript	2	12	4	2	3	1	2	4	6	1	2	1
Grc38_ENST00000582965|lincRNA	45	77	94	2	0	0	41	72	35	3	3	2
Grc38_ENST00000582983|lincRNA	1	2	0	0	0	0	2	1	2	0	2	0
Grc38_ENST00000583195|lincRNA	5	5	3	1	1	0	0	0	5	0	1	3
Grc38_ENST00000583253|sense_intronic	2	3	0	1	0	0	0	1	1	0	0	0
Grc38_ENST00000583416|lincRNA	2	5	4	2	2	1	1	0	3	0	1	1
Grc38_ENST00000583426|sense_intronic	13	8	4	0	0	0	1	2	3	1	0	0
Grc38_ENST00000583516|sense_intronic	0	3	0	0	3	0	1	2	4	1	1	4
Grc38_ENST00000584382|sense_intronic	4	8	3	0	1	0	4	2	8	0	1	0
Grc38_ENST00000584683|lincRNA	3	2	2	2	0	1	3	1	2	2	4	0
Grc38_ENST00000584721|lincRNA	6	2	5	0	0	0	0	0	3	0	0	0
Grc38_ENST00000584805|lincRNA	1	6	1	3	0	0	1	3	3	0	0	0
Grc38_ENST00000584926|processed_transcript	6	1	3	1	1	4	1	0	2	0	2	0
Grc38_ENST00000585065|lincRNA	7	4	3	0	0	0	1	3	4	0	0	0
Grc38_ENST00000585445|lincRNA	2	0	2	0	0	0	0	3	3	0	0	0
Grc38_ENST00000585484|lincRNA	1	4	2	2	1	0	0	1	1	0	0	1
Grc38_ENST00000585627|lincRNA	2	3	3	0	0	0	3	5	2	0	0	0
Grc38_ENST00000585691|lincRNA	102	77	38	0	0	0	8	6	35	1	0	0
Grc38_ENST00000585776|lincRNA	3	0	0	2	1	0	1	2	3	1	0	1
Grc38_ENST00000585863|lincRNA	13	17	8	0	0	1	10	6	10	0	1	0
Grc38_ENST00000585877|sense_intronic	0	1	0	0	0	0	0	2	0	0	0	0
Grc38_ENST00000586064|processed_transcript	0	1	1	0	0	0	0	3	5	0	0	0
Grc38_ENST00000586185|lincRNA	34	37	42	1	0	2	36	74	20	0	0	0
Grc38_ENST00000586209|lincRNA	1	5	2	0	0	0	0	4	3	0	0	0
Grc38_ENST00000586231|lincRNA	52473	136200	119906	1572	2787	3556	58713	95829	146245	842	2671	1390
Grc38_ENST00000586645|lincRNA	2	2	3	0	0	1	0	1	0	0	0	0
Grc38_ENST00000586726|processed_transcript	0	3	1	0	2	3	0	2	0	0	2	0
Grc38_ENST00000586798|processed_transcript	3	3	0	0	0	2	0	0	1	3	0	0
Grc38_ENST00000586885|lincRNA	3	2	2	0	1	2	0	0	2	0	0	0
Grc38_ENST00000586905|lincRNA	2	5	5	0	0	0	1	0	1	0	1	0
Grc38_ENST00000586922|lincRNA	0	0	0	0	1	1	0	1	2	0	0	0
Grc38_ENST00000586943|processed_transcript	6	8	9	0	1	0	0	1	5	0	0	1
Grc38_ENST00000586954|lincRNA	0	0	0	0	0	0	0	1	1	0	0	0
Grc38_ENST00000586983|sense_intronic	11	5	4	0	0	0	3	1	4	1	0	1
Grc38_ENST00000587125|lincRNA	0	3	3	0	1	0	0	3	6	0	1	0
Grc38_ENST00000587128|lincRNA	1	2	1	0	0	0	1	0	4	0	1	0
Grc38_ENST00000587616|lincRNA	0	5	6	0	0	1	3	6	3	0	1	0
Grc38_ENST00000587762|lincRNA	18	16	9	0	0	0	4	0	8	3	2	2
Grc38_ENST00000587933|sense_intronic	1	2	1	0	1	1	3	3	4	0	0	0
Grc38_ENST00000587960|lincRNA	1	1	2	0	0	0	0	4	6	0	0	0
Grc38_ENST00000587961|lincRNA	1	0	1	0	0	0	0	2	0	0	0	0
Grc38_ENST00000588275|lincRNA	0	0	0	2	2	1	0	0	0	2	0	0
Grc38_ENST00000588341|lincRNA	10	11	8	0	2	0	2	13	20	0	1	0
Grc38_ENST00000588424|lincRNA	0	2	2	0	1	0	3	4	5	0	0	0
Grc38_ENST00000588438|lincRNA	6	3	2	0	0	0	1	1	1	0	0	0
Grc38_ENST00000588495|lincRNA	3	0	2	0	0	0	2	1	1	0	0	0
Grc38_ENST00000588548|lincRNA	2	2	1	0	1	0	0	5	3	0	0	0
Grc38_ENST00000589187|processed_transcript	2	4	0	0	4	0	0	2	0	0	0	0
Grc38_ENST00000589217|processed_transcript	3	3	3	0	0	0	1	1	2	0	1	1
Grc38_ENST00000589259|lincRNA	1	1	1	0	0	0	2	4	3	0	0	0
Grc38_ENST00000589496|3prime_overlapping_ncrna	50	86	60	3	3	4	45	81	115	0	5	8
Grc38_ENST00000589716|lincRNA	0	3	2	0	1	0	1	0	3	0	1	1
Grc38_ENST00000589740|lincRNA	2	2	0	1	0	0	4	1	1	1	0	2
Grc38_ENST00000589754|lincRNA	0	0	0	0	0	0	0	0	1	0	0	0
Grc38_ENST00000590086|lincRNA	2	1	0	2	1	1	0	2	1	0	0	0
Grc38_ENST00000590241|sense_intronic	2	2	3	0	0	2	1	3	3	0	0	0
Grc38_ENST00000590274|lincRNA	5	16	5	1	2	2	2	1	3	0	0	0
Grc38_ENST00000590353|processed_transcript	0	5	2	0	0	3	2	4	4	0	0	0
Grc38_ENST00000590491|sense_intronic	4	3	3	0	1	0	2	1	6	0	1	0
Grc38_ENST00000590505|processed_transcript	5	3	4	2	0	0	0	0	8	0	0	0
Grc38_ENST00000590622|lincRNA	0	1	1	0	0	0	0	3	4	0	0	2
Grc38_ENST00000590628|lincRNA	5	12	2	0	0	1	1	0	1	0	0	0
Grc38_ENST00000590740|lincRNA	3	1	3	2	1	1	1	3	1	0	0	0
Grc38_ENST00000590750|lincRNA	2	0	0	2	0	4	1	0	0	0	1	0
Grc38_ENST00000590797|lincRNA	3	0	4	0	0	0	1	2	1	1	0	0
Grc38_ENST00000590912|lincRNA	41	45	12	0	0	0	0	0	11	0	0	0
Grc38_ENST00000591222|lincRNA	1	1	0	0	0	3	0	1	2	0	0	0
Grc38_ENST00000591343|sense_intronic	3	5	1	0	1	0	3	3	3	0	0	0
Grc38_ENST00000591372|lincRNA	0	0	0	0	0	0	1	2	3	0	0	0
Grc38_ENST00000591384|lincRNA	26	43	41	1	0	0	40	90	25	0	0	0
Grc38_ENST00000591501|lincRNA	13	14	3	0	0	0	0	1	4	1	1	0
Grc38_ENST00000591702|lincRNA	1	2	2	0	0	1	3	6	0	0	1	0
Grc38_ENST00000591892|processed_transcript	6	5	2	0	0	0	4	1	3	0	0	0
Grc38_ENST00000592107|lincRNA	1	0	1	0	0	0	0	0	0	0	0	0
Grc38_ENST00000592135|lincRNA	2	2	2	0	0	0	1	4	1	0	0	0
Grc38_ENST00000592187|processed_transcript	5	4	0	0	1	0	2	7	4	0	0	0
Grc38_ENST00000592371|lincRNA	2	2	3	0	0	0	1	0	3	0	0	0
Grc38_ENST00000592381|lincRNA	3	1	1	0	0	0	0	1	5	1	3	1
Grc38_ENST00000592572|lincRNA	2	3	1	0	0	0	2	2	1	0	0	1
Grc38_ENST00000592638|lincRNA	4	5	3	0	0	0	2	1	6	0	1	0
Grc38_ENST00000592670|lincRNA	2	1	3	1	6	1	2	0	4	1	0	0
Grc38_ENST00000592718|lincRNA	4	3	2	0	0	0	2	2	5	1	1	0
Grc38_ENST00000592744|lincRNA	3	1	0	0	0	0	1	0	1	0	0	0
Grc38_ENST00000592918|lincRNA	0	0	0	0	0	0	0	1	0	0	0	0
Grc38_ENST00000592939|processed_transcript	1	3	2	0	0	0	1	2	1	0	0	0
Grc38_ENST00000593117|lincRNA	0	3	3	0	0	0	0	3	3	0	0	0
Grc38_ENST00000593234|lincRNA	3	1	4	0	0	0	0	0	5	0	0	0
Grc38_ENST00000593393|lincRNA	2	7	4	1	2	0	3	6	11	0	4	0
Grc38_ENST00000593427|lincRNA	3	13	10	0	1	4	5	9	14	0	1	0
Grc38_ENST00000593604|lincRNA	0	0	3	0	2	0	0	2	3	0	1	0
Grc38_ENST00000593779|sense_intronic	0	2	1	0	0	0	1	0	1	0	0	0
Grc38_ENST00000593917|processed_transcript	3	8	5	15	24	22	7	4	8	7	11	3
Grc38_ENST00000594086|lincRNA	0	2	2	0	0	1	1	1	0	0	0	0
Grc38_ENST00000594119|processed_transcript	0	4	5	0	1	7	0	2	10	2	1	0
Grc38_ENST00000594329|lincRNA	4	6	2	0	0	0	1	1	0	0	0	0
Grc38_ENST00000594413|lincRNA	0	3	3	0	0	0	0	2	3	0	1	1
Grc38_ENST00000594418|lincRNA	1	2	4	0	0	1	1	2	0	0	1	0
Grc38_ENST00000594816|lincRNA	1	1	1	2	0	0	2	3	1	0	1	0
Grc38_ENST00000594934|lincRNA	9	10	2	0	1	0	3	1	0	0	0	0
Grc38_ENST00000595059|lincRNA	4	3	3	1	1	0	1	3	8	2	2	1
Grc38_ENST00000595094|lincRNA	0	1	3	0	0	2	1	0	3	0	0	0
Grc38_ENST00000595310|lincRNA	5	7	8	2	1	0	1	6	2	2	2	0
Grc38_ENST00000595508|processed_transcript	0	2	0	0	0	1	0	0	0	0	0	0
Grc38_ENST00000595886|lincRNA	4	8	10	4	1	2	4	6	14	1	1	1
Grc38_ENST00000595909|lincRNA	10	15	14	1	2	0	3	0	3	0	0	3
Grc38_ENST00000596000|lincRNA	6	13	9	2	0	0	3	1	3	0	0	1
Grc38_ENST00000596203|lincRNA	0	6	0	0	0	0	1	1	1	0	0	0
Grc38_ENST00000596283|lincRNA	1	3	2	0	0	0	1	2	1	0	1	0
Grc38_ENST00000596769|lincRNA	9	7	4	1	2	4	4	2	3	5	0	5
Grc38_ENST00000597173|lincRNA	0	0	0	1	1	0	1	3	3	0	0	0
Grc38_ENST00000597260|sense_intronic	0	0	1	0	1	0	1	0	2	0	0	0
Grc38_ENST00000597267|processed_transcript	2	4	5	0	0	0	0	4	7	2	0	0
Grc38_ENST00000597488|processed_transcript	3	8	11	2	0	0	2	1	2	0	0	1
Grc38_ENST00000597502|processed_transcript	4	2	2	1	1	1	2	0	0	0	1	2
Grc38_ENST00000597619|lincRNA	89	67	55	6	5	3	32	10	57	1	5	1
Grc38_ENST00000597651|sense_overlapping	1	3	2	0	0	0	0	3	2	0	0	0
Grc38_ENST00000597780|sense_intronic	184768	324957	278913	48785	62856	53372	224256	256942	339203	16108	65247	20556
Grc38_ENST00000598112|sense_intronic	15	21	10	2	0	1	5	1	5	0	4	0
Grc38_ENST00000598322|sense_intronic	17	17	14	4	14	6	8	7	14	1	8	2
Grc38_ENST00000598368|processed_transcript	7	3	7	0	1	1	1	2	1	0	1	0
Grc38_ENST00000598378|processed_transcript	2	2	2	0	2	0	1	2	2	0	0	1
Grc38_ENST00000598846|processed_transcript	37	44	30	24	18	17	19	11	31	5	15	5
Grc38_ENST00000598988|sense_intronic	2	0	3	0	0	0	1	0	2	0	0	0
Grc38_ENST00000598996|lincRNA	1	2	2	0	0	0	1	2	4	0	0	0
Grc38_ENST00000599109|processed_transcript	1	0	1	0	3	0	0	2	3	0	2	1
Grc38_ENST00000599320|lincRNA	1	6	2	0	0	0	2	4	5	0	0	0
Grc38_ENST00000599411|lincRNA	2	2	3	0	0	0	1	1	1	0	1	0
Grc38_ENST00000599486|lincRNA	7	7	3	0	0	0	2	0	2	0	0	0
Grc38_ENST00000599640|lincRNA	2	1	1	4	5	4	0	0	5	0	0	4
Grc38_ENST00000599749|lincRNA	0	1	3	0	1	0	0	1	8	0	1	1
Grc38_ENST00000599944|lincRNA	1	1	1	4	5	6	0	2	1	1	1	0
Grc38_ENST00000600225|processed_transcript	0	5	2	0	0	0	5	4	4	0	0	1
Grc38_ENST00000600643|lincRNA	1	4	1	0	0	0	2	0	4	0	0	1
Grc38_ENST00000601079|processed_transcript	7	11	7	2	2	0	4	6	6	2	4	5
Grc38_ENST00000601420|sense_intronic	4	2	5	1	1	0	1	0	3	0	0	0
Grc38_ENST00000601776|lincRNA	2	2	1	0	0	0	1	0	0	1	0	0
Grc38_ENST00000602145|lincRNA	4	3	1	0	0	0	1	2	3	0	1	0
Grc38_ENST00000602277|lincRNA	7	4	1	0	0	0	0	3	2	0	0	0
Grc38_ENST00000602301|vaultRNA	40	259	99	695	1319	971	27	115	433	174	658	382
Grc38_ENST00000602315|lincRNA	5	11	9	2	6	1	2	12	13	1	3	2
Grc38_ENST00000602324|lincRNA	2	14	16	0	2	0	3	5	18	0	0	0
Grc38_ENST00000602361|lincRNA	2848	6032	4866	69	201	212	2572	3921	2143	121	138	165
Grc38_ENST00000602396|lincRNA	2	6	2	0	1	0	1	3	4	0	1	0
Grc38_ENST00000602458|lincRNA	0	2	1	0	0	0	0	2	2	0	0	0
Grc38_ENST00000602461|lincRNA	2	2	0	0	0	0	2	0	3	0	0	0
Grc38_ENST00000602478|lincRNA	3944	7331	7323	268	494	714	4421	7076	7243	183	346	238
Grc38_ENST00000602481|sense_intronic	5	4	1	0	0	0	0	0	2	0	0	1
Grc38_ENST00000602488|processed_transcript	0	0	1	0	0	0	0	0	0	0	0	0
Grc38_ENST00000602507|lincRNA	5	1	1	0	0	0	2	8	5	0	0	0
Grc38_ENST00000602510|lincRNA	2	1	2	0	0	0	2	2	3	0	0	0
Grc38_ENST00000602543|lincRNA	0	0	0	0	1	1	0	0	2	0	0	0
Grc38_ENST00000602573|lincRNA	389	870	556	0	4	1	503	470	367	1	0	5
Grc38_ENST00000602575|sense_intronic	0	3	2	0	0	2	0	1	3	0	0	0
Grc38_ENST00000602585|lincRNA	2	2	0	0	2	0	1	1	3	0	0	1
Grc38_ENST00000602594|lincRNA	0	4	5	0	0	0	1	3	2	0	0	0
Grc38_ENST00000602605|sense_intronic	1	3	2	0	0	0	1	3	0	0	0	0
Grc38_ENST00000602652|lincRNA	1	2	3	0	0	0	3	3	1	0	0	0
Grc38_ENST00000602654|lincRNA	1	3	1	2	0	0	0	0	0	0	0	0
Grc38_ENST00000602663|sense_intronic	6	9	3	1	1	2	4	2	8	0	0	0
Grc38_ENST00000602755|lincRNA	41	50	62	0	1	0	52	62	44	0	2	1
Grc38_ENST00000602761|lincRNA	4	11	8	1	1	1	8	6	5	0	0	0
Grc38_ENST00000602772|lincRNA	1	4	2	0	3	0	2	11	6	0	5	1
Grc38_ENST00000602812|lincRNA	7	5	9	7	7	4	3	5	12	2	5	6
Grc38_ENST00000602813|lincRNA	239	481	353	85	204	165	381	337	485	166	377	212
Grc38_ENST00000602845|lincRNA	0	2	0	0	0	0	0	0	0	0	0	0
Grc38_ENST00000602847|lincRNA	1	4	4	0	0	0	1	2	2	0	0	0
Grc38_ENST00000602886|sense_intronic	0	3	1	3	1	0	0	1	1	0	0	0
Grc38_ENST00000602890|lincRNA	10	14	12	7	6	8	6	9	17	2	24	1
Grc38_ENST00000602957|lincRNA	3	2	5	0	1	0	0	5	7	0	0	0
Grc38_ENST00000602964|lincRNA	3	9	3	0	4	2	1	7	19	0	1	1
Grc38_ENST00000602988|sense_intronic	0	0	0	0	0	0	0	0	1	0	0	0
Grc38_ENST00000603037|sense_intronic	1	15	10	0	0	1	4	11	10	1	1	1
Grc38_ENST00000603308|sense_intronic	0	2	0	0	0	0	1	3	2	0	0	0
Grc38_ENST00000603385|lincRNA	3	4	3	1	0	2	4	3	3	0	2	0
Grc38_ENST00000603487|lincRNA	2	4	1	0	0	1	0	1	9	0	2	0
Grc38_ENST00000603633|lincRNA	0	2	1	0	0	0	1	2	4	0	0	0
Grc38_ENST00000604070|sense_intronic	0	13	9	0	0	1	7	9	9	1	0	0
Grc38_ENST00000604135|sense_intronic	130	214	153	1	4	5	203	218	87	0	4	0
Grc38_ENST00000604157|lincRNA	0	0	3	0	0	0	0	1	1	0	0	0
Grc38_ENST00000604397|lincRNA	3	6	5	2	4	0	1	10	5	3	0	2
Grc38_ENST00000604411|lincRNA	20	21	28	4	6	0	14	29	36	0	3	3
Grc38_ENST00000604430|lincRNA	1	4	4	1	1	0	0	2	4	0	3	2
Grc38_ENST00000604451|sense_intronic	0	0	0	0	0	0	1	0	1	0	0	0
Grc38_ENST00000604491|lincRNA	8	4	0	0	0	0	0	2	1	0	0	0
Grc38_ENST00000604514|lincRNA	1	0	1	0	0	0	1	1	1	0	0	0
Grc38_ENST00000604724|lincRNA	2	1	1	3	0	0	0	0	2	0	0	0
Grc38_ENST00000604760|lincRNA	1	3	1	0	0	1	1	0	1	0	0	0
Grc38_ENST00000604849|lincRNA	19	71	20	43	57	56	10	36	59	18	90	13
Grc38_ENST00000604855|lincRNA	2	7	0	1	0	0	2	2	1	1	0	0
Grc38_ENST00000604982|lincRNA	0	3	0	0	0	0	0	1	0	0	0	0
Grc38_ENST00000605200|lincRNA	0	1	0	0	0	0	0	0	1	0	0	0
Grc38_ENST00000605249|lincRNA	3	2	3	1	0	0	7	4	2	0	0	0
Grc38_ENST00000605350|lincRNA	10	21	7	1	1	1	3	3	5	0	0	0
Grc38_ENST00000605386|lincRNA	1	1	0	0	0	1	0	1	2	0	0	0
Grc38_ENST00000605502|lincRNA	3837	5955	4381	18	36	61	4089	4990	3732	9	22	25
Grc38_ENST00000605533|sense_intronic	460	682	655	2	4	5	587	803	281	7	11	1
Grc38_ENST00000605741|lincRNA	4	3	4	0	0	0	2	1	1	0	0	0
Grc38_ENST00000605794|processed_transcript	1	9	6	0	0	3	3	12	7	0	1	0
Grc38_ENST00000605834|lincRNA	5	2	0	0	0	0	2	2	5	0	0	1
Grc38_ENST00000605862|processed_transcript	0	4	1	0	1	1	0	2	4	0	2	0
Grc38_ENST00000605920|lincRNA	3	5	2	5	0	1	0	1	2	0	1	1
Grc38_ENST00000605929|lincRNA	6	7	3	0	0	1	2	1	3	1	0	1
Grc38_ENST00000605984|lincRNA	3	6	1	1	0	2	2	4	7	1	2	0
Grc38_ENST00000606004|processed_transcript	0	2	0	0	0	1	0	0	1	0	0	0
Grc38_ENST00000606125|lincRNA	2	6	4	0	3	0	2	7	3	1	1	0
Grc38_ENST00000606197|lincRNA	5	5	1	4	0	0	2	2	6	0	0	0
Grc38_ENST00000606229|sense_intronic	6	23	15	0	3	3	16	26	32	0	0	1
Grc38_ENST00000606272|lincRNA	0	0	0	0	2	0	0	1	0	0	0	0
Grc38_ENST00000606285|lincRNA	0	1	0	0	0	0	1	0	0	0	0	0
Grc38_ENST00000606336|lincRNA	4	2	4	0	0	0	0	1	2	0	0	0
Grc38_ENST00000606343|lincRNA	6	12	5	0	0	0	7	1	4	0	0	0
Grc38_ENST00000606393|lincRNA	15	11	15	0	0	0	1	1	12	0	0	0
Grc38_ENST00000606448|lincRNA	0	0	0	0	0	0	0	0	1	0	0	0
Grc38_ENST00000606512|sense_intronic	2	2	2	0	0	0	2	2	3	0	0	0
Grc38_ENST00000606640|sense_intronic	0	0	0	0	2	0	0	3	2	0	0	0
Grc38_ENST00000606686|lincRNA	0	0	1	0	0	0	0	0	0	0	0	0
Grc38_ENST00000606723|lincRNA	3	3	5	0	0	0	3	1	7	0	0	1
Grc38_ENST00000606727|lincRNA	2	4	1	1	2	2	1	1	1	0	2	0
Grc38_ENST00000606743|lincRNA	7	3	0	0	0	0	0	0	0	0	1	0
Grc38_ENST00000606898|lincRNA	0	0	2	0	1	0	3	3	2	0	0	0
Grc38_ENST00000606908|lincRNA	3	1	1	0	0	0	1	0	2	0	0	0
Grc38_ENST00000606927|sense_intronic	4	2	3	0	0	0	0	0	3	0	0	0
Grc38_ENST00000606966|lincRNA	2	3	4	1	0	0	0	0	3	0	1	1
Grc38_ENST00000607032|lincRNA	1	1	1	2	2	2	0	0	1	0	1	0
Grc38_ENST00000607056|lincRNA	6	10	3	1	0	2	2	6	9	1	1	3
Grc38_ENST00000607061|lincRNA	0	1	0	0	0	0	0	0	1	0	0	0
Grc38_ENST00000607100|lincRNA	7	4	2	0	1	0	5	0	4	1	0	0
Grc38_ENST00000607307|lincRNA	0	1	0	0	0	1	1	4	2	0	1	0
Grc38_ENST00000607315|lincRNA	6	2	2	0	0	0	3	0	0	0	0	0
Grc38_ENST00000607397|lincRNA	0	0	0	0	0	0	0	1	0	0	0	0
Grc38_ENST00000607458|lincRNA	41	29	10	0	2	1	8	0	10	1	1	0
Grc38_ENST00000607496|sense_intronic	2	4	3	2	2	0	2	5	7	2	1	1
Grc38_ENST00000607520|processed_transcript	549	848	654	7	16	15	624	700	585	6	18	3
Grc38_ENST00000607654|lincRNA	12	7	4	0	1	1	3	1	5	2	1	1
Grc38_ENST00000607727|lincRNA	4	3	3	0	0	0	1	2	6	0	1	0
Grc38_ENST00000607746|lincRNA	0	2	2	0	0	0	0	2	3	0	0	1
Grc38_ENST00000607781|lincRNA	3	5	1	1	1	2	0	1	2	0	1	0
Grc38_ENST00000607794|lincRNA	2	2	2	0	0	0	3	0	2	0	0	0
Grc38_ENST00000607836|lincRNA	3	2	0	0	0	0	2	6	8	0	0	1
Grc38_ENST00000607850|processed_transcript	1	1	2	0	2	0	0	1	6	1	1	0
Grc38_ENST00000608005|lincRNA	3	2	3	0	1	0	1	4	7	1	0	0
Grc38_ENST00000608023|lincRNA	5	4	8	0	1	2	2	2	3	0	0	1
Grc38_ENST00000608028|lincRNA	2	6	1	1	7	0	1	7	4	0	1	2
Grc38_ENST00000608123|lincRNA	1	3	1	0	0	0	1	0	3	0	0	0
Grc38_ENST00000608169|lincRNA	0	0	0	0	0	0	0	0	2	0	0	0
Grc38_ENST00000608206|lincRNA	6	11	2	0	0	0	1	0	1	1	0	0
Grc38_ENST00000608229|lincRNA	13	14	9	0	2	0	12	21	26	0	1	1
Grc38_ENST00000608272|processed_transcript	0	3	0	0	0	0	2	1	0	1	0	0
Grc38_ENST00000608317|lincRNA	2	2	2	0	0	0	4	0	1	0	1	0
Grc38_ENST00000608335|lincRNA	15	17	4	1	1	0	0	3	10	0	0	0
Grc38_ENST00000608358|lincRNA	1	2	3	0	0	1	1	3	0	0	0	0
Grc38_ENST00000608373|lincRNA	5	9	4	0	1	2	2	11	2	1	0	1
Grc38_ENST00000608412|lincRNA	12	9	3	0	0	0	9	13	8	0	0	0
Grc38_ENST00000608477|lincRNA	16	8	14	4	2	2	5	12	13	0	2	6
Grc38_ENST00000608487|processed_transcript	1	5	3	0	0	0	1	1	3	0	0	0
Grc38_ENST00000608511|processed_transcript	2	4	1	0	0	0	2	1	1	0	0	0
Grc38_ENST00000608521|processed_transcript	0	1	0	0	1	1	0	0	6	10	0	8
Grc38_ENST00000608591|lincRNA	2	3	1	0	0	0	2	1	6	0	0	0
Grc38_ENST00000608651|lincRNA	1	2	1	1	3	2	1	1	6	1	0	1
Grc38_ENST00000608694|lincRNA	2	5	2	0	0	0	2	2	6	1	1	0
Grc38_ENST00000608760|lincRNA	1	2	1	0	0	0	0	1	2	0	0	0
Grc38_ENST00000608834|lincRNA	2	4	2	0	1	0	0	1	3	0	0	0
Grc38_ENST00000608925|lincRNA	4	3	1	0	3	2	2	2	3	0	0	1
Grc38_ENST00000608990|lincRNA	1	6	3	0	3	1	1	5	5	0	2	0
Grc38_ENST00000609089|lincRNA	0	0	0	1	0	0	0	0	0	0	0	0
Grc38_ENST00000609127|lincRNA	0	0	2	0	0	0	0	2	3	0	0	0
Grc38_ENST00000609162|lincRNA	2	6	4	0	0	0	2	5	7	0	0	1
Grc38_ENST00000609169|processed_transcript	0	5	5	3	1	8	2	0	5	0	0	0
Grc38_ENST00000609170|processed_transcript	2	2	2	0	0	0	1	2	0	0	0	2
Grc38_ENST00000609248|processed_transcript	1	4	3	0	0	0	4	2	3	0	0	1
Grc38_ENST00000609270|lincRNA	0	6	5	0	0	1	0	5	5	0	2	0
Grc38_ENST00000609276|lincRNA	22	35	32	0	0	1	37	19	20	0	0	0
Grc38_ENST00000609352|processed_transcript	2	2	0	0	0	0	0	0	0	0	0	0
Grc38_ENST00000609398|lincRNA	1	0	0	0	0	0	0	0	0	0	0	0
Grc38_ENST00000609407|lincRNA	0	2	0	0	1	1	1	1	1	0	0	0
Grc38_ENST00000609475|sense_intronic	1	3	0	0	0	0	0	1	3	0	0	0
Grc38_ENST00000609522|lincRNA	13	7	3	0	0	1	0	0	6	0	0	0
Grc38_ENST00000609581|lincRNA	0	0	0	0	0	0	0	0	1	0	0	0
Grc38_ENST00000609590|processed_transcript	6	8	5	1	0	0	6	8	12	0	2	2
Grc38_ENST00000609596|lincRNA	1	4	0	1	0	0	0	1	3	0	1	1
Grc38_ENST00000609687|processed_transcript	6	7	4	0	0	0	3	3	9	0	0	0
Grc38_ENST00000609708|lincRNA	5	10	9	0	1	0	2	2	2	0	0	0
Grc38_ENST00000609737|processed_transcript	54	40	42	5	7	1	30	9	41	2	3	2
Grc38_ENST00000609742|lincRNA	4	1	0	0	0	0	1	1	4	0	0	1
Grc38_ENST00000609755|lincRNA	1	3	2	0	0	2	1	0	3	0	1	1
Grc38_ENST00000609770|lincRNA	45	33	16	2	2	0	12	1	14	0	0	1
Grc38_ENST00000609801|lincRNA	1	1	0	1	0	0	0	0	0	0	0	0
Grc38_ENST00000609803|lincRNA	4	7	2	0	1	0	5	3	4	0	2	0
Grc38_ENST00000609879|processed_transcript	13	209	15	3	1	3	2	7	31	3	3	2
Grc38_ENST00000609880|lincRNA	0	0	0	9	6	6	0	0	0	1	4	4
Grc38_ENST00000609914|processed_transcript	1	3	0	0	0	0	0	3	6	1	1	0
Grc38_ENST00000609937|lincRNA	22	5	4	0	0	0	6	1	3	0	1	0
Grc38_ENST00000609972|lincRNA	182	89	176	2	11	2	60	9	117	6	4	4
Grc38_ENST00000609990|lincRNA	0	0	0	0	0	0	0	1	0	0	0	0
Grc38_ENST00000610034|lincRNA	16	7	5	2	0	0	4	0	7	1	0	1
Grc38_ENST00000610036|lincRNA	1	2	2	0	0	2	1	1	0	0	1	1
Grc38_ENST00000610119|lincRNA	2	3	1	0	0	0	0	1	3	1	0	0
Grc38_ENST00000610122|lincRNA	5	2	0	27	22	13	1	0	2	13	6	7
Grc38_ENST00000610128|lincRNA	3	3	1	0	0	0	5	5	7	1	0	0
Grc38_ENST00000610155|processed_transcript	1	4	2	0	2	0	2	3	3	0	0	0
Grc38_ENST00000610481|lincRNA	12	17	14	0	2	0	10	28	27	1	1	3
Grc38_ENST00000610578|lincRNA	6	13	10	0	4	3	0	5	3	0	1	0
Grc38_ENST00000610778|lincRNA	2	3	2	1	2	0	2	3	0	0	0	0
Grc38_ENST00000610851|lincRNA	24	33	36	0	0	0	21	53	50	0	0	0
Grc38_ENST00000611182|lincRNA	0	1	3	4	0	2	2	0	0	1	0	1
Grc38_ENST00000611189|sense_intronic	5	5	1	0	2	0	5	7	9	1	0	0
Grc38_ENST00000611296|lincRNA	230	406	297	4	12	9	292	272	472	3	6	5
Grc38_ENST00000611316|lincRNA	17	19	6	0	0	1	6	1	11	0	0	2
Grc38_ENST00000611566|sense_intronic	2	2	3	0	1	0	1	1	6	0	1	0
Grc38_ENST00000611627|lincRNA	0	1	0	0	0	5	0	1	2	0	0	0
Grc38_ENST00000611654|lincRNA	0	1	0	0	0	1	0	0	1	0	0	0
Grc38_ENST00000611708|lincRNA	18	21	34	3	1	3	12	14	16	0	1	1
Grc38_ENST00000611742|sense_intronic	1	0	1	0	0	1	0	4	1	0	0	0
Grc38_ENST00000611809|sense_intronic	0	0	0	0	0	0	0	1	0	1	0	0
Grc38_ENST00000611877|lincRNA	3	2	0	0	0	0	0	1	2	0	0	0
Grc38_ENST00000612156|lincRNA	31	29	14	2	1	0	13	1	11	0	1	1
Grc38_ENST00000612252|lincRNA	1	7	12	2	2	0	1	6	0	1	3	0
Grc38_ENST00000612438|lincRNA	2	8	2	0	4	1	0	7	12	0	1	2
Grc38_ENST00000612496|lincRNA	24	36	24	0	4	0	17	45	34	0	2	0
Grc38_ENST00000612545|lincRNA	4	6	7	1	2	1	3	4	8	0	1	1
Grc38_ENST00000612568|lincRNA	6	11	8	0	0	0	0	4	13	1	0	0
Grc38_ENST00000612592|lincRNA	2	1	2	0	0	0	3	1	3	0	0	0
Grc38_ENST00000612598|lincRNA	2	3	0	0	0	0	0	0	3	0	0	0
Grc38_ENST00000612707|lincRNA	10	7	5	0	0	0	0	0	2	0	0	0
Grc38_ENST00000612781|lincRNA	4	4	8	0	0	2	2	7	7	0	0	0
Grc38_ENST00000612792|lincRNA	1	2	3	0	0	0	1	1	1	1	0	0
Grc38_ENST00000612900|processed_transcript	0	2	1	0	0	0	0	2	2	0	0	0
Grc38_ENST00000612970|lincRNA	1	2	4	0	0	0	1	1	1	0	0	0
Grc38_ENST00000612986|sense_intronic	309	242	158	17	20	19	95	29	180	14	7	37
Grc38_ENST00000612997|lincRNA	19	46	28	7	10	4	17	36	68	4	10	9
Grc38_ENST00000613093|lincRNA	0	2	0	0	0	0	0	2	0	0	0	0
Grc38_ENST00000613141|lincRNA	2	6	4	0	0	1	4	6	10	0	1	2
Grc38_ENST00000613161|lincRNA	6	7	3	0	0	1	3	4	4	1	0	0
Grc38_ENST00000613291|lincRNA	8	8	3	2	0	1	0	2	5	0	0	0
Grc38_ENST00000613361|lincRNA	4	4	2	0	3	0	2	4	7	0	1	2
Grc38_ENST00000613376|lincRNA	8	7	2	0	0	0	4	10	14	0	0	0
Grc38_ENST00000613749|lincRNA	2	7	1	0	0	0	1	2	8	0	0	0
Grc38_ENST00000613809|lincRNA	0	4	1	1	0	0	0	2	7	0	0	1
Grc38_ENST00000613917|lincRNA	315	1046	711	0	13	6	441	648	553	7	4	2
Grc38_ENST00000614046|lincRNA	0	1	2	0	0	0	1	1	0	0	0	0
Grc38_ENST00000614177|lincRNA	9	6	0	0	0	0	1	1	3	0	0	0
Grc38_ENST00000614316|lincRNA	1	2	2	0	1	0	1	1	5	0	0	0
Grc38_ENST00000614334|lincRNA	3	7	8	0	0	0	0	4	7	0	1	0
Grc38_ENST00000614362|processed_transcript	4	9	7	0	1	3	1	6	11	3	0	1
Grc38_ENST00000614400|lincRNA	2	3	4	1	1	0	1	1	4	0	2	1
Grc38_ENST00000614510|processed_transcript	1	0	0	1	0	1	0	0	0	0	0	0
Grc38_ENST00000614517|lincRNA	0	3	1	0	0	0	0	4	8	1	0	0
Grc38_ENST00000614576|lincRNA	7	6	10	0	2	3	7	5	7	0	0	3
Grc38_ENST00000614781|sense_intronic	6	2	1	0	0	0	0	2	1	0	0	0
Grc38_ENST00000615168|lincRNA	2	2	0	0	2	0	1	1	1	0	1	0
Grc38_ENST00000615251|lincRNA	1	4	2	1	0	0	2	1	6	0	0	0
Grc38_ENST00000615314|processed_transcript	1	2	1	0	0	0	0	0	3	0	0	0
Grc38_ENST00000615357|lincRNA	2	3	2	0	0	0	0	2	4	1	0	0
Grc38_ENST00000615433|processed_transcript	0	0	2	1	1	2	1	2	0	1	0	0
Grc38_ENST00000615947|lincRNA	2	3	1	0	1	0	2	4	0	0	0	0
Grc38_ENST00000616116|lincRNA	1	2	0	0	0	2	0	2	4	0	1	0
Grc38_ENST00000616213|lincRNA	3	2	0	0	0	0	2	1	0	0	0	0
Grc38_ENST00000616315|lincRNA	15	15	6	0	0	1	4	40	18	0	0	0
Grc38_ENST00000616338|lincRNA	1	0	4	0	0	1	1	1	3	0	0	0
Grc38_ENST00000616527|lincRNA	32	79	55	1	2	4	54	78	82	0	6	1
Grc38_ENST00000616576|lincRNA	3	1	1	1	0	1	1	0	4	0	1	0
Grc38_ENST00000616691|lincRNA	10	16	18	0	0	0	5	23	31	0	0	0
Grc38_ENST00000616774|processed_transcript	7	0	0	0	0	0	1	0	3	0	0	0
Grc38_ENST00000616994|lincRNA	6	6	1	0	0	0	1	1	0	0	0	0
Grc38_ENST00000617013|lincRNA	3	1	1	0	0	0	0	0	4	0	0	0
Grc38_ENST00000617117|lincRNA	0	2	2	0	0	0	1	0	2	0	0	0
Grc38_ENST00000617323|lincRNA	3	3	6	2	2	2	1	2	3	1	1	1
Grc38_ENST00000617352|processed_transcript	1	1	1	0	0	2	2	1	1	0	0	0
Grc38_ENST00000617415|sense_intronic	4	2	2	0	0	0	1	3	3	0	0	1
Grc38_ENST00000617439|sense_intronic	1	2	2	0	1	0	0	2	4	1	0	0
Grc38_ENST00000617489|lincRNA	1	4	2	0	0	0	0	1	5	0	0	0
Grc38_ENST00000617518|processed_transcript	1	1	0	1	2	1	0	1	0	0	0	0
Grc38_ENST00000617568|lincRNA	9	4	5	1	0	0	2	4	9	2	1	1
Grc38_ENST00000617627|lincRNA	2	3	5	0	0	0	5	6	10	0	1	0
Grc38_ENST00000617702|lincRNA	8	9	17	79	50	77	8	6	37	25	84	23
Grc38_ENST00000617791|lincRNA	10	10	15	2	0	2	14	21	24	0	0	0
Grc38_ENST00000617901|lincRNA	0	0	3	0	0	0	0	0	1	0	0	0
Grc38_ENST00000618132|lincRNA	37	53	33	0	0	0	37	62	81	1	0	0
Grc38_ENST00000618199|lincRNA	1	1	1	1	0	1	2	6	3	0	0	0
Grc38_ENST00000618227|lincRNA	35	51	26	0	1	0	33	49	73	0	0	0
Grc38_ENST00000618256|lincRNA	0	1	1	0	1	0	3	0	3	1	0	0
Grc38_ENST00000618285|lincRNA	1	0	2	0	0	1	1	1	4	0	1	0
Grc38_ENST00000618303|lincRNA	1	1	0	0	2	0	0	1	1	1	0	0
Grc38_ENST00000618311|processed_transcript	0	3	0	1	0	0	1	4	0	0	0	0
Grc38_ENST00000618494|lincRNA	1	0	0	0	0	0	0	0	0	0	0	0
Grc38_ENST00000618589|lincRNA	14317	28998	22633	864	1607	1429	18531	24205	22711	787	3647	1315
Grc38_ENST00000618799|sense_intronic	0	3	0	0	0	0	0	2	0	0	0	0
Grc38_ENST00000618809|lincRNA	0	0	0	0	0	1	1	1	3	0	0	0
Grc38_ENST00000618835|sense_intronic	0	10	4	0	1	2	4	4	3	1	3	0
Grc38_ENST00000618845|lincRNA	12	14	16	0	0	0	2	1	10	0	0	0
Grc38_ENST00000618925|lincRNA	16	19	20	0	0	0	7	33	19	0	3	0
Grc38_ENST00000618966|lincRNA	2	3	1	0	1	0	2	1	2	0	0	0
Grc38_ENST00000619044|lincRNA	0	5	3	0	0	3	0	0	2	0	1	0
Grc38_ENST00000619092|sense_intronic	3	1	2	1	0	0	1	4	5	0	1	0
Grc38_ENST00000619226|sense_intronic	4	5	1	0	0	5	3	6	2	0	0	0
Grc38_ENST00000619354|lincRNA	11	10	5	0	0	0	1	0	4	0	0	0
Grc38_ENST00000619431|processed_transcript	89	88	133	64	125	102	129	79	159	25	71	28
Grc38_ENST00000619442|lincRNA	1	4	2	0	0	0	0	2	4	1	0	0
Grc38_ENST00000619449|lincRNA	27	40	26	1	4	4	28	73	75	0	0	0
Grc38_ENST00000619486|sense_intronic	1	3	3	2	1	2	0	7	4	0	0	1
Grc38_ENST00000619652|processed_transcript	3	9	3	0	0	2	6	6	6	0	0	2
Grc38_ENST00000619862|processed_transcript	1	3	0	0	0	0	2	2	5	0	0	0
Grc38_ENST00000619960|lincRNA	11	14	5	0	3	0	0	1	4	0	0	0
Grc38_ENST00000620163|lincRNA	0	3	1	0	0	2	0	0	2	0	0	0
Grc38_ENST00000620171|lincRNA	3	6	1	0	0	0	6	1	0	0	0	0
Grc38_ENST00000620246|lincRNA	3	0	0	0	0	0	1	0	6	0	0	0
Grc38_ENST00000620266|lincRNA	0	6	9	0	1	4	0	6	11	0	6	0
Grc38_ENST00000620272|lincRNA	0	5	2	0	0	1	1	2	4	0	0	0
Grc38_ENST00000620274|sense_intronic	4	0	2	0	0	0	1	1	1	2	2	0
Grc38_ENST00000620377|lincRNA	2	4	0	0	0	0	0	1	2	0	0	0
Grc38_ENST00000620465|lincRNA	12	11	6	0	0	0	7	14	14	0	0	0
Grc38_ENST00000620472|sense_intronic	2	1	1	1	0	0	0	0	2	0	0	0
Grc38_ENST00000620495|lincRNA	1	1	3	1	2	1	1	1	2	1	3	1
Grc38_ENST00000620503|sense_intronic	7	3	4	1	1	1	1	0	5	1	0	1
Grc38_ENST00000620519|lincRNA	5	14	10	0	2	0	5	9	11	0	2	0
Grc38_ENST00000620769|lincRNA	4	2	3	0	0	0	0	0	2	0	2	3
Grc38_ENST00000620778|lincRNA	106	58	23	0	0	1	11	1	19	3	0	1
Grc38_ENST00000620902|lincRNA	8	25	16	3	7	0	6	10	14	2	3	1
Grc38_ENST00000621050|lincRNA	3	3	2	0	0	1	1	0	5	0	0	0
Grc38_ENST00000621052|lincRNA	4	9	3	0	1	0	0	3	4	0	0	0
Grc38_ENST00000621423|sense_intronic	1	4	6	0	0	2	1	1	6	0	0	1
Grc38_ENST00000621548|processed_transcript	2	5	5	0	2	0	5	4	4	0	0	0
Grc38_ENST00000621575|sense_intronic	0	4	0	0	0	1	1	1	4	0	0	0
Grc38_ENST00000621919|lincRNA	4	5	7	0	1	0	1	9	4	1	0	1
Grc38_ENST00000621929|lincRNA	5	2	0	0	2	1	1	1	2	1	1	1
Grc38_ENST00000621942|lincRNA	3	2	0	0	0	1	1	3	1	0	1	1
Grc38_ENST00000622091|sense_intronic	2	1	0	0	0	1	0	5	1	0	0	2
Grc38_ENST00000622201|sense_intronic	1038	657	419	856	1387	1592	1847	1541	1286	463	1207	544
Grc38_ENST00000622229|lincRNA	33	22	33	1	1	2	9	1	16	1	0	0
Grc38_ENST00000622328|lincRNA	6	64	40	0	1	4	31	38	64	1	0	0
Grc38_ENST00000622355|processed_transcript	0	8	3	0	0	0	2	4	5	0	0	0
Grc38_ENST00000622359|lincRNA	9	7	7	0	1	0	2	3	3	0	0	0
Grc38_ENST00000622466|lincRNA	0	0	0	0	0	0	0	0	1	0	0	0
Grc38_ENST00000622602|lincRNA	1	1	3	3	2	8	0	1	2	0	4	0
Grc38_ENST00000622750|lincRNA	1	2	2	0	4	0	0	1	2	0	0	1
Grc38_ENST00000622794|lincRNA	2	2	0	0	0	0	0	0	1	0	0	0
Grc38_ENST00000622888|lincRNA	0	1	1	0	1	0	0	0	5	0	0	0
Grc38_ENST00000622966|sense_intronic	1	10	2	0	0	0	0	1	5	2	0	2
Grc38_ENST00000623027|lincRNA	6	10	6	0	5	0	3	3	2	4	14	4
Grc38_ENST00000623040|processed_transcript	0	1	1	0	1	2	0	1	2	0	3	2
Grc38_ENST00000623047|lincRNA	1	4	1	0	0	0	0	1	3	0	1	0
Grc38_ENST00000623075|sense_overlapping	32	29	24	3	6	3	21	16	38	3	6	2
Grc38_ENST00000623111|sense_overlapping	190	176	107	11	21	20	69	46	118	12	14	20
Grc38_ENST00000623130|sense_overlapping	240	424	298	17	41	30	255	427	547	27	41	48
Grc38_ENST00000623163|processed_transcript	3	3	0	0	0	0	0	2	3	0	1	0
Grc38_ENST00000623196|processed_transcript	9	1	2	0	0	0	1	0	0	0	0	0
Grc38_ENST00000623199|lincRNA	30	37	26	5	6	5	22	36	50	9	12	13
Grc38_ENST00000623290|lincRNA	14	27	13	1	0	4	8	20	22	1	0	0
Grc38_ENST00000623374|lincRNA	0	2	4	1	0	0	2	1	3	0	0	0
Grc38_ENST00000623379|lincRNA	2	8	6	0	0	1	0	0	5	1	1	0
Grc38_ENST00000623391|lincRNA	46	62	62	1	3	6	27	51	75	3	3	2
Grc38_ENST00000623395|lincRNA	6	10	13	61	50	67	3	8	21	17	49	23
Grc38_ENST00000623420|lincRNA	9	9	12	0	0	2	7	5	14	0	0	3
Grc38_ENST00000623422|lincRNA	1	5	2	0	0	0	1	0	4	0	1	0
Grc38_ENST00000623440|sense_intronic	86	52	37	1	1	3	37	8	35	5	2	1
Grc38_ENST00000623490|lincRNA	36	29	20	2	2	0	4	5	18	1	0	0
Grc38_ENST00000623538|lincRNA	1	1	1	0	1	0	2	3	1	1	3	0
Grc38_ENST00000623598|processed_transcript	0	2	3	0	0	0	1	5	6	0	0	0
Grc38_ENST00000623616|processed_transcript	2	2	1	1	0	0	1	0	3	0	0	0
Grc38_ENST00000623638|processed_transcript	3	1	1	0	0	0	1	4	7	0	0	0
Grc38_ENST00000623644|lincRNA	2796	1761	1542	102	140	138	871	455	1581	123	109	161
Grc38_ENST00000623646|lincRNA	1	2	1	0	0	0	0	0	2	0	0	0
Grc38_ENST00000623647|processed_transcript	11	20	11	2	0	0	5	0	11	2	0	1
Grc38_ENST00000623664|lincRNA	0	2	1	0	3	4	0	2	5	2	0	2
Grc38_ENST00000623686|lincRNA	0	0	3	0	1	0	0	1	1	0	0	0
Grc38_ENST00000623726|sense_overlapping	80	78	54	6	13	23	36	29	75	1	11	7
Grc38_ENST00000623740|sense_overlapping	2	4	3	1	0	1	1	3	4	0	1	1
Grc38_ENST00000623749|lincRNA	0	4	1	0	1	2	0	1	1	0	1	1
Grc38_ENST00000623760|lincRNA	2	0	1	0	0	0	0	1	1	0	0	0
Grc38_ENST00000623776|sense_intronic	2	2	0	0	0	0	3	1	0	0	0	0
Grc38_ENST00000623789|sense_overlapping	182	130	114	74	53	62	60	87	129	15	63	18
Grc38_ENST00000623860|lincRNA	0	3	1	0	2	0	0	0	0	0	0	0
Grc38_ENST00000623892|lincRNA	1	4	1	0	0	0	0	1	0	0	0	0
Grc38_ENST00000623901|processed_transcript	1	6	5	3	6	1	1	5	1	0	3	0
Grc38_ENST00000623947|lincRNA	4	11	3	0	0	3	1	0	6	0	0	0
Grc38_ENST00000623956|lincRNA	16	16	24	5	0	1	3	9	15	1	2	5
Grc38_ENST00000624060|processed_transcript	5	3	4	0	1	0	0	0	5	0	0	0
Grc38_ENST00000624080|processed_transcript	0	1	2	0	2	1	1	2	4	0	1	1
Grc38_ENST00000624086|processed_transcript	48	39	24	1	2	0	12	1	14	1	2	0
Grc38_ENST00000624184|sense_overlapping	102	67	18	4	6	10	49	137	99	4	5	1
Grc38_ENST00000624219|lincRNA	3	3	1	0	1	0	1	0	1	0	0	0
Grc38_ENST00000624224|lincRNA	7	5	4	0	0	0	0	0	2	0	0	0
Grc38_ENST00000624235|lincRNA	218	203	153	6	10	6	78	76	135	8	16	13
Grc38_ENST00000624243|lincRNA	49	35	19	1	0	2	17	7	15	0	2	0
Grc38_ENST00000624264|lincRNA	50	54	49	11	8	7	13	43	67	4	7	6
Grc38_ENST00000624278|sense_intronic	620	387	264	10	22	14	166	95	294	19	13	26
Grc38_ENST00000624295|processed_transcript	2	7	3	3	0	0	1	2	2	0	3	1
Grc38_ENST00000624350|lincRNA	24	31	22	0	2	4	3	21	29	2	1	2
Grc38_ENST00000624442|lincRNA	7	7	5	1	1	0	2	3	6	2	0	2
Grc38_ENST00000624444|lincRNA	0	1	2	1	0	0	0	2	1	0	0	0
Grc38_ENST00000624601|lincRNA	35	39	37	1	0	5	12	17	27	8	1	1
Grc38_ENST00000624617|lincRNA	3	2	3	0	2	4	0	1	3	0	1	1
Grc38_ENST00000624632|lincRNA	16	10	12	6	0	10	2	4	4	1	8	6
Grc38_ENST00000624818|sense_intronic	0	5	0	0	0	0	0	2	3	1	0	1
Grc38_ENST00000624835|lincRNA	1	3	5	0	0	0	0	1	1	0	1	1
Grc38_ENST00000624867|sense_intronic	4	0	0	0	3	1	0	2	3	0	0	1
Grc38_ENST00000624919|sense_overlapping	130	81	53	155	171	187	47	44	75	58	154	91
Grc38_ENST00000624980|sense_intronic	2	2	2	0	1	0	0	5	6	0	2	1
Grc38_ENST00000625038|lincRNA	4	7	2	0	0	0	0	0	1	0	0	0
Grc38_ENST00000625129|lincRNA	0	1	0	0	0	0	0	0	0	0	0	0
Grc38_ENST00000625157|lincRNA	17	28	14	0	2	2	11	8	18	2	1	0
Grc38_ENST00000625287|processed_transcript	2	9	3	0	0	0	3	11	10	0	0	0
Grc38_ENST00000625310|lincRNA	0	1	0	0	1	0	0	1	3	0	0	0
Grc38_ENST00000625445|lincRNA	7	12	9	5	0	1	4	5	13	0	0	0
Grc38_ENST00000625513|lincRNA	28	52	16	3	4	1	18	18	31	1	3	1
Grc38_ENST00000625598|lincRNA	42918	74912	56924	34738	39685	48689	34019	62258	79033	11422	44332	10812
Grc38_ENST00000625643|scaRNA	19	45	19	0	0	0	12	22	17	0	3	0
Grc38_ENST00000625713|lincRNA	0	5	3	0	0	0	2	5	2	0	1	0
Grc38_ENST00000625982|lincRNA	25	29	15	2	10	13	12	4	23	1	5	4
Grc38_ENST00000626230|lincRNA	0	2	3	0	0	0	0	3	1	0	0	0
Grc38_ENST00000626286|lincRNA	1	1	0	0	1	1	1	0	2	0	0	0
Grc38_ENST00000626287|lincRNA	11	13	7	0	0	0	4	1	5	0	0	1
Grc38_ENST00000626667|lincRNA	4	15	3	0	1	2	3	0	1	1	0	0
Grc38_ENST00000626729|processed_transcript	5	8	3	1	0	0	2	5	12	0	0	0
Grc38_ENST00000626817|lincRNA	2	10	2	3	2	0	2	4	4	0	2	0
Grc38_ENST00000626826|macro_lncRNA	549	847	575	60	94	72	402	740	962	57	74	73
Grc38_ENST00000626977|sense_intronic	3	1	0	0	1	0	0	1	2	0	2	1
Grc38_ENST00000627071|lincRNA	6	18	12	0	3	0	7	23	23	0	1	0
Grc38_ENST00000627127|lincRNA	1	7	4	3	0	0	2	12	12	0	1	0
Grc38_ENST00000627173|lincRNA	14	15	16	0	2	1	7	23	24	0	1	2
Grc38_ENST00000627324|scaRNA	28	31	34	0	1	0	24	32	30	0	0	0
Grc38_ENST00000627566|lincRNA	1	1	0	0	3	1	1	0	0	0	1	5
Grc38_ENST00000627823|processed_transcript	5	23	12	5	5	2	3	9	22	0	2	1
Grc38_ENST00000628013|processed_transcript	2	2	1	1	1	0	0	1	2	0	1	0
Grc38_ENST00000628428|lincRNA	0	3	0	0	1	0	0	1	5	0	2	1
Grc38_ENST00000628595|processed_transcript	12	9	12	0	1	0	1	1	4	0	0	1
Grc38_ENST00000628622|lincRNA	2	1	2	0	2	1	1	1	0	0	0	0
Grc38_ENST00000628757|processed_transcript	0	6	3	0	0	0	1	2	2	0	1	1
Grc38_ENST00000629045|scaRNA	25	54	49	0	4	1	67	56	58	1	4	1
Grc38_ENST00000629145|lincRNA	0	3	1	0	0	3	3	2	5	0	0	0
Grc38_ENST00000629293|lincRNA	4	5	3	0	0	0	5	6	6	0	0	0
Grc38_ENST00000629295|lincRNA	69	122	102	7	11	11	73	137	157	5	9	6
Grc38_ENST00000629393|sense_intronic	0	4	4	0	3	0	2	3	1	0	0	0
Grc38_ENST00000629406|lincRNA	0	4	1	0	0	0	0	0	3	1	0	0
Grc38_ENST00000629461|sense_intronic	0	1	0	0	0	3	0	0	1	0	0	0
Grc38_ENST00000629564|sense_overlapping	0	1	0	1	0	0	2	2	2	0	0	0
Grc38_ENST00000629595|lincRNA	1	1	0	3	2	0	0	0	3	0	1	0
Grc38_ENST00000629636|processed_transcript	0	0	2	0	0	0	0	1	2	0	0	0
Grc38_ENST00000629651|lincRNA	2	2	0	0	0	3	2	1	3	0	0	0
Grc38_ENST00000629732|lincRNA	1	4	1	0	0	0	0	1	1	0	0	0
Grc38_ENST00000629899|lincRNA	4	5	1	0	0	0	0	0	2	1	0	0
Grc38_ENST00000629902|sense_intronic	0	0	0	1	2	4	1	0	1	0	0	0
Grc38_ENST00000629969|lincRNA	35646	62829	47042	30005	34935	41808	28501	51867	64785	9810	37931	9536
Grc38_ENST00000630034|sense_intronic	0	3	3	0	0	2	1	3	6	0	2	0
Grc38_ENST00000630054|sense_intronic	6	7	13	1	1	0	3	5	9	1	1	5
Grc38_ENST00000630162|lincRNA	0	1	0	0	0	0	0	0	0	0	0	0
Grc38_ENST00000630242|lincRNA	1	1	3	0	0	0	0	1	0	4	1	1
Grc38_ENST00000630333|lincRNA	0	2	0	0	0	0	1	2	5	0	0	0
Grc38_ENST00000630354|lincRNA	2	1	2	0	0	0	1	1	3	0	0	0
Grc38_ENST00000630558|lincRNA	3	2	2	0	0	1	0	0	2	0	0	0
Grc38_ENST00000630918|lincRNA	487	661	495	196	172	173	186	316	653	165	185	138
Grc38_ENST00000630946|lincRNA	2	4	1	0	0	2	0	8	7	0	1	1
Grc38_ENST00000631128|sense_intronic	2	4	0	1	0	0	4	1	1	0	0	0
Grc38_ENST00000631169|lincRNA	3	1	3	1	0	0	2	1	1	0	0	1
Grc38_ENST00000631175|processed_transcript	0	0	0	0	0	0	0	2	0	0	0	0
Grc38_ENST00000631190|lincRNA	0	3	1	0	2	0	1	1	7	0	2	0
Grc38_ENST00000631211|lincRNA	42496	75328	57352	34628	39886	48393	33542	62687	79331	11313	44178	10894
Grc38_ENST00000631235|lincRNA	0	1	1	0	0	0	1	4	2	0	0	0
Grc38_ENST00000631258|lincRNA	8	8	12	0	0	0	1	2	3	0	0	0
Grc38_ENST00000631276|processed_transcript	3	3	2	0	3	0	1	4	8	0	1	0
lncrnadb_7sk_homosapiens_1|Homo	1864	6449	4309	281	416	852	1872	2586	3428	117	284	121
lncrnadb_7sl_homosapiens_1|Homo	16475	20484	15600	15129	16487	19334	9758	13359	15212	7061	16448	6585
lncrnadb_cdr1-as_homosapiens_1|Homo	27	34	34	46	15	27	12	21	19	3	13	1
lncrnadb_disc2_homosapiens_1|Homo	2	7	3	1	2	4	3	1	4	0	0	0
lncrnadb_emx2os_homosapiens_1|Homo	4	9	2	1	3	1	2	3	7	1	0	2
lncrnadb_kcnq1ot1_homosapiens_1|Homo	502	243	109	3	4	1	70	37	136	2	3	1
lncrnadb_lust_homosapiens_1|Homo	0	3	2	0	0	0	1	2	3	0	0	0
lncrnadb_megamind_musmusculus_5|Mus	36	33	44	1	4	0	6	1	26	2	0	2
lncrnadb_msur1_musmusculus_1|Mus	240312	381304	244847	111839	128645	152472	214743	342880	315155	44517	148069	44881
lncrnadb_mt-lipcar_hg_1|Homo	95	360	229	971	752	1070	110	299	382	294	1617	232
lncrnadb_ncran_hg_1|Homo	13	16	12	6	11	6	18	12	20	2	7	0
lncrnadb_neat1_homosapiens_2|Homo	560	622	377	1	13	9	504	1967	991	1	4	3
lncrnadb_pgsf1_hg_1|Homo	4	6	1	1	0	0	2	4	8	0	4	2
lncrnadb_THRIL_hg_1|Homo	2	1	2	1	0	0	0	1	4	2	1	0
lncrnadb_UM9-5_hg_1|Homo	5	2	1	0	0	0	0	0	0	0	0	0
lncrnadb_Y-RNAs_hg_1|Homo	1584	2487	1522	2586	4098	5532	2613	2677	1795	1075	3134	997
lncrnadb_yam-1_mm10_1|Mus	37663	62106	45560	44226	51125	57688	27534	50359	70063	19075	57062	22652

## Sheet: read counts per sncRNA species 
NAME	1 NF-CELL	2 NF-CELL	3 NF-CELL	1 NF-EXO	2 NF-EXO	3 NF-EXO	1 CAF-CELL	2 CAF-CELL	3 CAF-CELL	1 CAF-EXO	2 CAF-EXO	3 CAF-EXO
Grc38_ENST00000347264|snRNA	1	2	1	1	1	1	2	4	3	0	0	0
Grc38_ENST00000347538|miRNA	3	6	0	2	0	0	1	9	1	0	0	0
Grc38_ENST00000349529|miRNA	39	70	56	8	3	10	100	114	38	1	1	2
Grc38_ENST00000362102|miRNA	438	702	545	124	71	87	814	748	336	33	72	23
Grc38_ENST00000362104|miRNA	175	238	241	111	36	53	397	390	427	19	35	10
Grc38_ENST00000362105|miRNA	1286	1470	1253	876	551	512	1878	1917	1292	201	574	140
Grc38_ENST00000362111|miRNA	2332	2751	2048	217	51	70	4174	2861	2060	13	51	26
Grc38_ENST00000362112|miRNA	0	2	1	0	0	0	4	2	4	0	0	0
Grc38_ENST00000362114|miRNA	54	52	61	6	2	0	59	43	37	1	1	1
Grc38_ENST00000362116|miRNA	1263	1438	1250	922	564	568	1972	1978	1288	214	583	127
Grc38_ENST00000362117|miRNA	55	63	72	26	6	10	98	129	98	1	12	4
Grc38_ENST00000362125|miRNA	16	19	23	15	4	6	23	57	34	2	4	0
Grc38_ENST00000362134|miRNA	8282	12368	11199	8629	3041	4943	35325	40222	23166	1964	4860	1299
Grc38_ENST00000362135|miRNA	291	356	307	115	26	20	265	271	224	12	32	24
Grc38_ENST00000362142|miRNA	1	6	4	13	3	11	6	9	1	2	6	0
Grc38_ENST00000362145|miRNA	19	23	11	7	0	0	26	24	15	0	0	0
Grc38_ENST00000362147|miRNA	0	5	2	0	0	0	4	11	11	0	0	0
Grc38_ENST00000362150|miRNA	490	592	468	83	19	44	686	463	274	9	27	5
Grc38_ENST00000362153|miRNA	85	178	108	15	3	13	92	117	29	4	6	2
Grc38_ENST00000362155|miRNA	52	72	39	13	1	10	81	99	80	0	2	1
Grc38_ENST00000362159|miRNA	8	16	10	0	0	0	14	13	15	0	1	1
Grc38_ENST00000362160|miRNA	83	94	87	145	71	93	86	122	65	19	65	13
Grc38_ENST00000362162|miRNA	42	61	61	24	6	8	81	66	30	6	7	0
Grc38_ENST00000362165|miRNA	563	1480	1313	52	17	22	1224	1653	632	12	12	8
Grc38_ENST00000362173|miRNA	18	35	43	31	8	8	24	39	9	0	3	1
Grc38_ENST00000362177|miRNA	25	71	88	49	20	12	27	61	44	5	8	9
Grc38_ENST00000362181|miRNA	90	141	102	12	13	3	146	134	72	6	13	4
Grc38_ENST00000362183|miRNA	12	32	15	2	1	0	26	12	7	1	0	1
Grc38_ENST00000362188|miRNA	178	208	198	0	0	0	2	1	403	0	0	0
Grc38_ENST00000362195|miRNA	31	56	50	82	12	15	54	74	60	7	9	4
Grc38_ENST00000362196|miRNA	12	19	12	21	9	14	19	19	10	5	11	6
Grc38_ENST00000362199|miRNA	44	53	29	22	14	22	38	37	27	8	12	3
Grc38_ENST00000362201|miRNA	1699	2379	1862	2343	752	1016	1948	2037	1077	440	669	429
Grc38_ENST00000362202|miRNA	690	830	850	282	141	147	1530	1849	1287	70	145	44
Grc38_ENST00000362205|miRNA	1829	2921	2110	774	223	398	2210	2275	1670	109	217	81
Grc38_ENST00000362212|miRNA	15	18	13	9	3	11	13	21	4	7	5	1
Grc38_ENST00000362215|miRNA	595	745	1288	684	133	436	753	1042	604	56	221	38
Grc38_ENST00000362218|miRNA	159	159	187	124	25	32	215	264	138	7	13	9
Grc38_ENST00000362220|miRNA	1	4	7	0	0	0	11	5	3	1	1	0
Grc38_ENST00000362222|miRNA	16	29	14	2	0	4	16	17	18	0	0	0
Grc38_ENST00000362224|miRNA	138	218	189	26	6	15	301	215	108	3	13	6
Grc38_ENST00000362227|miRNA	124	202	161	94	33	50	106	226	137	6	31	15
Grc38_ENST00000362237|miRNA	379	371	316	300	118	156	365	340	219	72	85	71
Grc38_ENST00000362239|miRNA	408	456	414	97	21	47	489	453	205	5	24	9
Grc38_ENST00000362251|miRNA	118	201	167	57	34	37	296	310	295	4	14	10
Grc38_ENST00000362252|miRNA	165	311	286	42	25	24	338	305	165	8	17	7
Grc38_ENST00000362260|miRNA	39	51	25	2	1	3	42	42	41	0	3	0
Grc38_ENST00000362262|miRNA	26	45	33	6	4	5	61	60	70	0	1	1
Grc38_ENST00000362263|miRNA	235	324	246	285	124	170	409	400	330	54	106	44
Grc38_ENST00000362265|miRNA	30	45	57	70	14	16	59	71	46	6	9	2
Grc38_ENST00000362279|miRNA	87	163	166	24	14	5	188	320	215	4	6	1
Grc38_ENST00000362280|miRNA	1386	1775	1879	211	129	137	2357	2525	1841	39	122	35
Grc38_ENST00000362281|miRNA	32	30	29	8	0	3	44	24	28	0	1	0
Grc38_ENST00000362283|miRNA	749	1370	1195	583	219	388	1228	1235	724	141	208	135
Grc38_ENST00000362288|miRNA	8	8	10	0	0	0	0	1	9	0	0	0
Grc38_ENST00000362291|miRNA	13	23	18	356	72	177	27	33	21	33	51	21
Grc38_ENST00000362295|miRNA	1260	1379	1247	929	569	534	1976	1916	1305	217	555	129
Grc38_ENST00000362298|miRNA	10	30	11	2	3	6	30	39	36	1	0	0
Grc38_ENST00000362302|miRNA	11	27	18	0	2	1	24	33	18	0	2	2
Grc38_ENST00000362307|miRNA	284	612	295	11	5	8	526	693	346	3	7	1
Grc38_ENST00000362309|miRNA	3421	5222	4305	1725	975	935	5792	6214	5225	382	642	230
Grc38_ENST00000362310|miRNA	13	12	11	0	0	0	14	7	17	0	0	0
Grc38_ENST00000362317|miRNA	36	57	28	19	3	5	46	54	37	2	3	3
Grc38_ENST00000362412|snoRNA	17	31	20	0	0	0	14	17	14	0	0	0
Grc38_ENST00000362423|snoRNA	15	39	40	8	20	17	24	47	27	4	17	13
Grc38_ENST00000362443|snRNA	3	15	11	0	1	0	6	10	12	0	0	0
Grc38_ENST00000362477|snRNA	983	2249	1357	9	29	22	928	1590	4147	4	22	8
Grc38_ENST00000362507|snRNA	72	18	37	0	0	0	85	22	115	0	1	0
Grc38_ENST00000362512|snRNA	19	45	49	53	26	39	29	44	67	17	33	20
Grc38_ENST00000362535|snoRNA	0	3	1	0	0	0	2	3	8	0	0	0
Grc38_ENST00000362566|snoRNA	2	4	5	0	0	0	2	5	2	0	0	0
Grc38_ENST00000362607|snoRNA	29	42	35	1	3	1	22	38	95	0	2	1
Grc38_ENST00000362627|snRNA	4	2	1	1	0	0	2	0	3	2	1	3
Grc38_ENST00000362698|snRNA	1446	3741	2647	13	30	28	1720	2642	5251	7	25	9
Grc38_ENST00000362700|snRNA	23	26	47	0	0	0	0	0	35	0	0	0
Grc38_ENST00000362704|snoRNA	21	48	39	2	0	0	58	32	59	0	0	1
Grc38_ENST00000362705|snoRNA	90	121	118	1	2	5	101	76	79	1	3	3
Grc38_ENST00000362723|snoRNA	67	87	73	0	0	2	46	83	32	0	0	0
Grc38_ENST00000362759|snRNA	1	4	1	5	1	1	2	1	7	2	12	3
Grc38_ENST00000362761|snoRNA	106	161	138	15	8	16	97	105	83	16	10	13
Grc38_ENST00000362803|snoRNA	48	78	87	0	0	0	56	76	128	0	0	2
Grc38_ENST00000362805|snoRNA	18	43	23	0	0	1	28	33	18	0	0	0
Grc38_ENST00000362817|snRNA	2	10	3	0	2	1	2	3	5	1	0	2
Grc38_ENST00000362839|snRNA	1	3	12	0	1	0	1	4	11	0	0	0
Grc38_ENST00000362883|snoRNA	173	294	243	1	0	4	179	255	125	1	1	5
Grc38_ENST00000362915|snoRNA	4	4	4	0	0	0	3	4	6	1	0	0
Grc38_ENST00000362928|snoRNA	9	23	9	0	1	0	4	6	4	0	0	0
Grc38_ENST00000362935|snRNA	0	2	4	1	3	1	2	0	2	0	3	3
Grc38_ENST00000362942|snRNA	1	1	3	1	0	0	0	1	3	0	0	0
Grc38_ENST00000362986|snoRNA	3	5	0	0	0	0	0	3	0	0	0	0
Grc38_ENST00000363009|snRNA	1	0	1	5	4	1	1	0	1	2	2	1
Grc38_ENST00000363010|snRNA	4	4	3	1	0	0	5	1	3	0	0	0
Grc38_ENST00000363036|snRNA	0	2	4	0	0	0	0	0	6	0	0	0
Grc38_ENST00000363044|snoRNA	3	2	7	0	0	0	7	6	1	0	0	0
Grc38_ENST00000363062|snRNA	9	22	13	3	3	1	9	13	26	3	3	3
Grc38_ENST00000363064|snoRNA	337	760	653	4	5	2	439	720	294	1	4	0
Grc38_ENST00000363091|snoRNA	26	33	43	0	0	0	72	88	44	0	1	0
Grc38_ENST00000363107|snoRNA	1	2	4	0	0	0	4	3	3	0	0	0
Grc38_ENST00000363156|snoRNA	0	3	2	0	0	0	0	4	3	0	0	0
Grc38_ENST00000363192|snRNA	4	11	7	0	1	0	1	4	5	0	0	0
Grc38_ENST00000363202|snoRNA	12	41	31	0	0	0	21	21	18	0	0	0
Grc38_ENST00000363214|snoRNA	122	249	180	1	0	6	168	205	128	1	1	3
Grc38_ENST00000363217|snoRNA	96	219	167	0	4	0	102	142	161	4	5	7
Grc38_ENST00000363237|snRNA	0	2	2	1	0	0	1	2	2	0	1	1
Grc38_ENST00000363286|snRNA	2074	5017	3646	9	55	51	2411	3712	6394	16	46	29
Grc38_ENST00000363299|snRNA	5	37	24	0	0	0	1	18	58	0	0	1
Grc38_ENST00000363306|snRNA	3	6	5	24	48	26	2	4	14	19	121	46
Grc38_ENST00000363313|snRNA	2	10	21	0	0	0	1	9	10	0	0	0
Grc38_ENST00000363314|snRNA	4	11	17	5	5	1	3	5	6	13	8	29
Grc38_ENST00000363315|snoRNA	37	64	53	0	0	0	31	52	28	3	0	0
Grc38_ENST00000363319|snRNA	0	8	13	0	0	0	1	3	12	0	0	0
Grc38_ENST00000363327|snRNA	3	2	1	5	9	12	1	1	4	7	61	22
Grc38_ENST00000363334|snRNA	1	4	7	21	19	15	2	4	3	89	36	131
Grc38_ENST00000363336|snoRNA	0	1	3	0	0	0	3	3	1	0	0	0
Grc38_ENST00000363345|snoRNA	58	109	74	4	1	0	75	57	43	0	0	0
Grc38_ENST00000363354|snRNA	0	3	0	0	0	0	3	0	4	0	0	0
Grc38_ENST00000363367|snoRNA	3	7	3	0	0	1	4	8	3	0	0	0
Grc38_ENST00000363389|snoRNA	99	93	150	0	0	0	88	110	42	0	1	0
Grc38_ENST00000363409|snoRNA	2	2	3	0	0	1	2	3	2	0	0	0
Grc38_ENST00000363426|snRNA	4	9	7	25	38	42	7	6	30	43	93	70
Grc38_ENST00000363448|snoRNA	6	11	3	0	0	0	0	0	8	0	0	0
Grc38_ENST00000363450|snoRNA	49	75	78	2	4	0	39	76	88	0	1	0
Grc38_ENST00000363484|snoRNA	5	10	3	0	1	0	6	10	12	2	0	0
Grc38_ENST00000363485|snoRNA	8	23	26	0	0	1	11	17	16	0	1	0
Grc38_ENST00000363497|snoRNA	21	39	12	7	0	0	20	30	11	2	0	2
Grc38_ENST00000363506|snRNA	2	4	0	0	0	0	2	2	6	0	3	0
Grc38_ENST00000363507|snoRNA	1	3	5	0	0	0	0	0	22	0	0	0
Grc38_ENST00000363508|snRNA	3	4	0	0	0	0	1	2	5	0	2	0
Grc38_ENST00000363515|snoRNA	27	31	33	0	0	0	0	0	41	0	0	0
Grc38_ENST00000363536|snoRNA	72	79	83	0	0	1	75	62	53	0	2	0
Grc38_ENST00000363543|snoRNA	58	52	36	2	1	0	47	45	21	0	0	1
Grc38_ENST00000363548|snoRNA	4	24	18	0	0	0	6	7	7	0	0	0
Grc38_ENST00000363572|snoRNA	40	55	55	0	0	0	0	0	112	0	0	0
Grc38_ENST00000363593|snoRNA	55	201	153	1	6	7	85	139	289	0	4	1
Grc38_ENST00000363610|snoRNA	16	12	13	0	1	0	16	10	5	0	1	0
Grc38_ENST00000363626|snoRNA	57	37	68	2	0	0	84	69	100	0	0	1
Grc38_ENST00000363660|snoRNA	8	14	12	0	0	0	18	16	10	0	1	0
Grc38_ENST00000363664|snoRNA	10	24	28	0	0	0	8	25	16	0	0	0
Grc38_ENST00000363738|snoRNA	5	13	10	1	0	0	7	11	7	0	1	0
Grc38_ENST00000363742|snoRNA	12	19	21	0	1	0	12	9	10	0	1	0
Grc38_ENST00000363750|snoRNA	1	5	3	3	2	1	0	0	2	0	1	1
Grc38_ENST00000363753|snoRNA	279	516	334	0	0	2	299	353	228	0	0	1
Grc38_ENST00000363762|snoRNA	17	15	17	1	0	4	27	18	15	10	0	4
Grc38_ENST00000363791|snoRNA	4	10	1	0	0	0	0	0	5	0	0	0
Grc38_ENST00000363836|snoRNA	6	10	13	0	0	0	11	16	10	0	0	0
Grc38_ENST00000363915|snoRNA	0	3	4	0	0	0	4	6	3	0	0	0
Grc38_ENST00000363919|snRNA	3	1	2	2	5	1	1	2	1	0	1	1
Grc38_ENST00000363925|snRNA	182	574	444	8	2	9	208	321	375	1	4	1
Grc38_ENST00000363930|snRNA	1	1	0	2	1	1	0	2	2	1	4	3
Grc38_ENST00000363937|snRNA	2	2	1	2	1	1	2	2	3	0	1	9
Grc38_ENST00000363944|snRNA	1	4	5	2	0	1	2	3	9	0	0	1
Grc38_ENST00000363981|snoRNA	359	554	433	1	10	9	521	473	280	0	3	2
Grc38_ENST00000364009|snoRNA	37	119	122	5	0	0	79	95	120	1	2	0
Grc38_ENST00000364015|snRNA	0	1	0	5	1	1	0	1	0	1	8	2
Grc38_ENST00000364019|snRNA	2	11	9	0	0	0	1	3	7	0	0	0
Grc38_ENST00000364027|snoRNA	9	12	22	0	0	1	16	13	10	0	0	0
Grc38_ENST00000364033|snRNA	6	14	14	2	1	0	5	10	46	0	6	1
Grc38_ENST00000364043|snoRNA	180	272	283	0	5	4	208	259	183	1	4	3
Grc38_ENST00000364071|snRNA	13	20	0	0	0	0	0	0	5	0	0	0
Grc38_ENST00000364079|snoRNA	5	6	11	0	0	0	0	0	4	0	0	0
Grc38_ENST00000364089|snoRNA	10	24	15	1	0	1	16	8	28	0	3	1
Grc38_ENST00000364105|snRNA	0	3	1	0	5	4	0	0	0	1	5	6
Grc38_ENST00000364113|snoRNA	31	47	47	2	3	3	30	51	59	2	2	3
Grc38_ENST00000364116|snRNA	1	3	3	0	0	0	0	0	4	0	0	0
Grc38_ENST00000364127|snRNA	0	0	0	1	0	0	0	1	0	7	2	7
Grc38_ENST00000364139|snoRNA	115	244	201	0	1	0	139	152	117	0	0	2
Grc38_ENST00000364249|snRNA	2	7	2	0	0	1	0	0	1	0	1	0
Grc38_ENST00000364259|snoRNA	14	58	66	0	0	0	14	50	68	0	1	0
Grc38_ENST00000364294|snRNA	103	362	218	0	1	1	100	178	250	0	0	1
Grc38_ENST00000364300|snRNA	1	2	2	12	8	17	3	4	3	34	28	40
Grc38_ENST00000364310|snRNA	4	24	34	0	0	0	3	15	30	0	0	0
Grc38_ENST00000364314|snRNA	2	4	6	0	0	0	2	4	8	0	0	0
Grc38_ENST00000364329|snoRNA	3	4	4	0	0	0	5	4	4	1	0	0
Grc38_ENST00000364359|snoRNA	3	0	2	0	0	0	3	3	1	0	0	0
Grc38_ENST00000364370|snoRNA	69	96	82	1	0	0	96	119	53	0	1	1
Grc38_ENST00000364377|snoRNA	2	3	1	0	0	0	3	0	2	0	0	0
Grc38_ENST00000364383|snRNA	2	5	8	0	0	0	4	3	7	0	0	0
Grc38_ENST00000364393|snoRNA	3	3	3	0	0	0	3	4	2	0	0	0
Grc38_ENST00000364401|snRNA	3	9	6	3	3	1	2	5	7	1	6	8
Grc38_ENST00000364421|snRNA	2	2	3	10	28	14	1	2	9	63	53	154
Grc38_ENST00000364432|snoRNA	14	15	20	2	0	2	13	19	28	1	0	2
Grc38_ENST00000364478|snoRNA	2	3	1	0	0	0	0	4	0	0	0	0
Grc38_ENST00000364514|snoRNA	12	16	4	0	0	0	0	0	6	0	0	0
Grc38_ENST00000364516|snRNA	0	0	0	8	11	0	0	0	0	2	0	0
Grc38_ENST00000364528|snoRNA	2	6	2	0	0	0	4	3	11	0	0	0
Grc38_ENST00000364533|snoRNA	22	53	52	9	0	1	32	34	46	0	1	0
Grc38_ENST00000364569|snRNA	90	360	281	0	0	0	121	200	260	0	0	0
Grc38_ENST00000364578|snoRNA	28	60	47	0	2	1	47	59	43	0	0	2
Grc38_ENST00000364587|snoRNA	3	10	8	0	0	0	7	4	8	0	0	1
Grc38_ENST00000364588|snRNA	1	2	6	0	0	0	3	1	3	0	0	0
Grc38_ENST00000364617|snoRNA	31	61	42	0	0	0	30	58	25	0	0	1
Grc38_ENST00000364687|snoRNA	13	15	9	0	0	0	7	12	8	0	0	0
Grc38_ENST00000364688|snRNA	3	7	5	0	2	0	5	3	28	1	0	2
Grc38_ENST00000364699|snoRNA	8	13	9	0	0	0	13	16	12	1	0	0
Grc38_ENST00000364722|snoRNA	8	10	4	0	0	0	5	10	5	0	0	0
Grc38_ENST00000364739|snRNA	2	3	1	1	1	0	0	0	2	0	0	0
Grc38_ENST00000364749|snoRNA	4	6	5	0	0	0	0	0	8	0	0	0
Grc38_ENST00000364758|snRNA	1	6	4	0	0	0	1	3	6	0	0	0
Grc38_ENST00000364773|snoRNA	27	39	31	0	0	0	16	15	35	0	0	0
Grc38_ENST00000364789|snRNA	6	11	7	0	0	2	3	6	10	0	0	0
Grc38_ENST00000364802|snoRNA	9	22	11	0	0	0	28	26	6	0	0	0
Grc38_ENST00000364805|snoRNA	63	94	68	0	3	6	72	81	40	1	0	3
Grc38_ENST00000364819|snoRNA	9	10	4	0	0	0	7	3	2	0	0	0
Grc38_ENST00000364830|snoRNA	7	7	5	0	0	0	8	5	7	0	0	0
Grc38_ENST00000364849|snoRNA	129	292	223	0	0	0	166	239	177	1	0	2
Grc38_ENST00000364874|snRNA	5	6	9	0	0	1	6	4	2	0	1	0
Grc38_ENST00000364877|snRNA	41	31	2	0	0	0	0	0	1	0	0	0
Grc38_ENST00000364902|snoRNA	4	5	7	0	2	0	7	5	3	0	0	0
Grc38_ENST00000364931|snRNA	22	62	46	0	1	0	19	34	126	0	4	1
Grc38_ENST00000364935|snRNA	0	2	5	0	0	0	0	1	6	0	0	0
Grc38_ENST00000364938|snoRNA	82	173	158	0	2	5	88	131	90	0	1	1
Grc38_ENST00000364951|snRNA	0	7	6	0	0	0	1	2	7	0	1	0
Grc38_ENST00000364953|snoRNA	75	133	206	0	2	3	99	144	48	0	0	0
Grc38_ENST00000364957|snoRNA	7	8	3	0	1	0	1	0	4	0	0	1
Grc38_ENST00000364968|snoRNA	5	13	7	0	1	0	12	11	4	2	0	1
Grc38_ENST00000364969|snoRNA	81	104	88	2	3	1	69	83	45	1	0	0
Grc38_ENST00000364977|snoRNA	16	45	40	1	3	0	29	38	19	0	1	0
Grc38_ENST00000364995|snoRNA	14	21	6	0	1	3	13	12	20	0	0	2
Grc38_ENST00000365012|snoRNA	11	12	7	0	0	0	9	11	5	0	0	0
Grc38_ENST00000365028|snoRNA	6	30	21	0	0	0	10	17	17	0	0	0
Grc38_ENST00000365029|snoRNA	3	4	3	0	0	0	3	4	4	0	0	0
Grc38_ENST00000365037|snoRNA	8	4	12	0	0	0	0	0	5	0	0	0
Grc38_ENST00000365040|snRNA	1	10	5	1	1	2	3	2	2	6	6	6
Grc38_ENST00000365075|snoRNA	3	5	9	0	0	0	1	5	3	0	1	0
Grc38_ENST00000365080|snoRNA	18	19	16	3	0	1	21	16	10	1	2	0
Grc38_ENST00000365128|snoRNA	28	49	38	1	0	0	24	33	32	0	0	0
Grc38_ENST00000365153|snoRNA	104	324	306	1	1	3	176	270	100	1	0	0
Grc38_ENST00000365161|snoRNA	23	64	48	2	2	1	42	49	65	0	0	2
Grc38_ENST00000365172|snoRNA	40	76	93	0	0	1	53	73	140	1	1	2
Grc38_ENST00000365178|snoRNA	11	10	11	0	0	1	11	8	16	0	0	1
Grc38_ENST00000365199|snRNA	1	10	11	0	0	0	4	4	3	0	0	0
Grc38_ENST00000365223|snoRNA	107	183	142	1	3	3	211	179	100	1	4	1
Grc38_ENST00000365372|snRNA	18	31	64	0	0	1	0	1	50	0	0	1
Grc38_ENST00000365379|snRNA	2	11	5	0	0	0	5	4	7	0	0	1
Grc38_ENST00000365382|snoRNA	220	596	486	7	5	8	259	461	320	3	1	4
Grc38_ENST00000365400|snoRNA	32	24	34	0	0	0	31	22	23	0	1	1
Grc38_ENST00000365423|snoRNA	139	159	167	0	4	0	189	198	80	1	0	1
Grc38_ENST00000365430|snRNA	3	15	23	0	0	0	4	9	21	0	0	0
Grc38_ENST00000365444|snoRNA	31	53	45	1	2	1	53	56	78	6	3	2
Grc38_ENST00000365477|snRNA	1	7	4	22	13	18	4	9	6	40	42	84
Grc38_ENST00000365493|snoRNA	14	25	22	1	1	0	9	26	18	0	3	4
Grc38_ENST00000365519|snoRNA	9	11	5	0	0	2	4	7	3	0	0	0
Grc38_ENST00000365530|snoRNA	104	88	89	1	4	3	117	103	106	0	1	3
Grc38_ENST00000365574|snRNA	25	60	43	0	1	1	35	60	165	1	2	1
Grc38_ENST00000365607|snoRNA	344	1080	1039	0	0	1	368	671	300	1	3	1
Grc38_ENST00000365628|snoRNA	5	13	9	0	0	0	0	0	9	0	0	0
Grc38_ENST00000365633|snoRNA	154	272	170	1	2	1	174	170	105	3	2	0
Grc38_ENST00000365659|snoRNA	13	23	17	0	1	0	15	14	26	0	2	0
Grc38_ENST00000365664|snRNA	4	2	1	0	1	1	1	5	7	0	2	0
Grc38_ENST00000365668|snRNA	209	753	671	6	11	8	276	446	589	2	8	4
Grc38_ENST00000365690|miRNA	8	5	4	1	1	1	7	8	9	0	0	1
Grc38_ENST00000365696|miRNA	3	8	11	2	0	3	15	7	9	0	1	0
Grc38_ENST00000365699|miRNA	443	236	332	88	51	107	221	190	214	6	31	15
Grc38_ENST00000365731|miRNA	0	8	4	0	0	0	6	14	10	0	0	0
Grc38_ENST00000365739|miRNA	6	1	2	0	0	0	0	0	1	0	0	0
Grc38_ENST00000383858|snRNA	126	313	315	319	451	425	153	233	468	1163	1447	2133
Grc38_ENST00000383860|snRNA	10	21	33	0	1	0	13	16	29	0	2	1
Grc38_ENST00000383870|snoRNA	12	28	23	0	0	0	8	17	18	0	1	1
Grc38_ENST00000383875|snoRNA	220	454	374	2	2	5	299	357	219	1	2	2
Grc38_ENST00000383885|snoRNA	26	39	34	0	0	0	19	37	33	1	0	0
Grc38_ENST00000383886|snRNA	7	22	20	0	0	0	8	8	17	0	0	0
Grc38_ENST00000383893|snoRNA	31	36	36	10	0	1	37	28	22	3	6	6
Grc38_ENST00000383894|snoRNA	1	5	4	0	1	0	1	7	2	0	0	0
Grc38_ENST00000383895|snoRNA	5	1	1	0	0	0	0	1	13	0	1	1
Grc38_ENST00000383897|snRNA	24	17	24	2	4	3	1	2	28	2	12	5
Grc38_ENST00000383902|snRNA	3	9	7	7	6	4	3	5	7	13	9	20
Grc38_ENST00000383903|snoRNA	348	744	550	4	5	2	341	517	533	2	2	2
Grc38_ENST00000383904|snRNA	24	26	1	0	0	0	1	1	2	0	0	1
Grc38_ENST00000383907|snoRNA	2	7	4	0	0	0	2	1	4	0	0	0
Grc38_ENST00000383934|snoRNA	5	11	5	0	0	1	4	6	4	1	0	0
Grc38_ENST00000383953|snoRNA	298	453	447	3	4	10	301	434	534	2	3	4
Grc38_ENST00000383961|snoRNA	2	10	4	0	0	0	6	3	5	0	0	0
Grc38_ENST00000383968|snRNA	1	0	56	0	0	0	0	0	0	0	0	0
Grc38_ENST00000383975|snRNA	81	158	180	258	380	377	72	140	239	1080	1281	2141
Grc38_ENST00000383991|snRNA	0	2	2	0	0	1	0	2	8	0	0	0
Grc38_ENST00000384020|snRNA	1	4	11	1	0	0	0	2	10	0	0	0
Grc38_ENST00000384027|snoRNA	21	65	81	0	0	0	52	50	56	0	0	1
Grc38_ENST00000384033|snoRNA	9	33	49	1	0	1	13	26	41	0	0	0
Grc38_ENST00000384048|snoRNA	43	79	69	0	2	0	55	70	120	0	1	0
Grc38_ENST00000384072|snoRNA	7	8	7	3	0	0	4	8	50	0	0	0
Grc38_ENST00000384075|snRNA	0	0	0	5	5	0	0	0	1	1	0	0
Grc38_ENST00000384084|snoRNA	11	25	13	0	0	0	5	13	14	0	0	0
Grc38_ENST00000384093|snRNA	4	3	6	16	21	24	6	11	17	10	40	11
Grc38_ENST00000384096|snoRNA	23	71	54	0	1	0	31	35	54	0	1	0
Grc38_ENST00000384107|snoRNA	0	3	1	0	0	0	1	1	8	0	0	0
Grc38_ENST00000384111|snoRNA	0	2	3	0	0	0	1	6	3	0	0	2
Grc38_ENST00000384121|snRNA	2	11	16	1	0	1	0	11	24	0	0	0
Grc38_ENST00000384129|snRNA	0	3	3	0	0	0	0	2	6	0	0	0
Grc38_ENST00000384136|snRNA	181	395	224	0	2	1	192	257	776	0	1	0
Grc38_ENST00000384147|snoRNA	395	761	565	0	9	3	393	567	316	2	21	5
Grc38_ENST00000384154|snRNA	0	0	1	3	2	4	1	1	2	1	5	0
Grc38_ENST00000384158|snoRNA	12	45	60	1	1	1	22	25	108	0	1	2
Grc38_ENST00000384174|snoRNA	5	10	19	0	0	0	6	9	11	0	0	0
Grc38_ENST00000384176|snoRNA	17	63	53	0	0	0	30	31	39	0	1	0
Grc38_ENST00000384181|snRNA	2	9	8	8	11	9	3	6	18	19	10	19
Grc38_ENST00000384210|snoRNA	5	7	3	0	0	0	4	3	7	0	0	0
Grc38_ENST00000384214|snoRNA	21	47	51	0	2	0	34	27	32	1	5	1
Grc38_ENST00000384215|snoRNA	476	899	960	0	3	0	415	818	369	0	0	0
Grc38_ENST00000384220|snoRNA	8	18	14	0	0	0	28	18	17	1	0	0
Grc38_ENST00000384229|snoRNA	127	177	191	0	1	2	163	148	117	4	2	5
Grc38_ENST00000384252|snoRNA	653	920	796	5	6	3	760	548	916	1	2	6
Grc38_ENST00000384262|snoRNA	112	110	90	2	2	4	139	136	77	0	1	1
Grc38_ENST00000384274|snoRNA	4	11	10	0	0	2	7	10	4	2	0	2
Grc38_ENST00000384276|snRNA	0	10	17	0	0	0	1	3	10	0	1	0
Grc38_ENST00000384287|snoRNA	14	24	22	0	1	1	11	26	21	1	0	0
Grc38_ENST00000384304|snoRNA	250	519	514	1	2	7	341	447	341	1	0	2
Grc38_ENST00000384320|snoRNA	18	34	21	7	1	1	52	51	51	0	0	0
Grc38_ENST00000384323|snoRNA	5	8	4	0	0	2	9	2	17	0	1	0
Grc38_ENST00000384325|snRNA	6	11	4	0	0	0	0	0	2	0	0	0
Grc38_ENST00000384328|snRNA	2	1	0	5	1	5	0	6	0	10	13	16
Grc38_ENST00000384332|snRNA	3	2	4	0	0	0	1	0	1	0	0	0
Grc38_ENST00000384334|snoRNA	2	20	18	1	0	0	12	22	28	0	0	0
Grc38_ENST00000384335|snoRNA	9	6	13	0	0	0	13	21	11	0	0	0
Grc38_ENST00000384337|snRNA	0	2	7	0	0	0	2	0	3	0	0	0
Grc38_ENST00000384339|snoRNA	30	76	73	0	0	0	34	50	42	0	0	0
Grc38_ENST00000384342|snoRNA	30	92	62	0	1	2	28	55	66	0	0	0
Grc38_ENST00000384356|snoRNA	13	18	24	0	1	1	13	23	19	0	0	0
Grc38_ENST00000384360|snoRNA	97	173	180	1	0	0	59	117	53	2	0	1
Grc38_ENST00000384365|snoRNA	13	29	31	0	1	0	11	8	18	1	0	0
Grc38_ENST00000384370|snoRNA	6	2	3	0	0	0	4	5	5	0	0	0
Grc38_ENST00000384372|snoRNA	1	6	5	0	0	0	0	5	7	0	0	0
Grc38_ENST00000384382|snRNA	1	5	6	1	0	1	2	5	12	0	2	1
Grc38_ENST00000384384|snoRNA	5	9	7	0	2	0	5	16	21	0	0	0
Grc38_ENST00000384388|snRNA	8	25	33	1	2	0	17	15	39	0	0	0
Grc38_ENST00000384390|snoRNA	44	389	319	0	6	3	60	279	169	0	0	3
Grc38_ENST00000384401|snoRNA	11	33	37	0	0	1	19	22	39	0	0	0
Grc38_ENST00000384416|snoRNA	58	82	79	1	2	7	66	79	70	1	3	0
Grc38_ENST00000384423|snoRNA	5	12	14	0	0	0	3	7	27	0	0	0
Grc38_ENST00000384425|snRNA	4	4	5	21	13	14	4	9	12	80	36	137
Grc38_ENST00000384430|snoRNA	1	8	1	0	0	1	3	5	1	0	1	0
Grc38_ENST00000384436|snoRNA	12	10	4	0	0	0	3	9	5	0	1	1
Grc38_ENST00000384437|snoRNA	32	74	47	0	0	0	43	58	75	0	0	0
Grc38_ENST00000384439|snoRNA	0	12	4	0	0	0	2	4	9	0	0	0
Grc38_ENST00000384445|snoRNA	1	10	5	0	0	0	6	4	3	0	0	0
Grc38_ENST00000384446|snRNA	19	30	36	42	55	40	20	26	49	53	159	83
Grc38_ENST00000384452|snoRNA	29	54	37	0	0	2	30	26	36	0	0	0
Grc38_ENST00000384453|snRNA	0	1	0	2	1	2	2	1	1	0	1	0
Grc38_ENST00000384462|snoRNA	3	4	7	0	0	0	0	5	3	0	0	0
Grc38_ENST00000384470|snoRNA	0	0	1	0	0	0	4	1	4	0	0	0
Grc38_ENST00000384472|snRNA	3	10	11	2	2	3	4	6	18	17	9	23
Grc38_ENST00000384476|snRNA	50	97	72	18	27	23	61	85	71	604	72	1320
Grc38_ENST00000384499|snRNA	54	106	73	240	348	314	88	92	92	771	1158	1692
Grc38_ENST00000384505|snRNA	28	43	48	0	0	0	0	0	97	0	0	0
Grc38_ENST00000384507|snoRNA	3	4	1	1	0	0	5	3	5	1	0	0
Grc38_ENST00000384512|snoRNA	68	102	97	4	1	5	87	88	60	1	4	3
Grc38_ENST00000384516|snoRNA	5	3	2	0	0	0	4	6	0	0	0	0
Grc38_ENST00000384529|snoRNA	1	11	6	0	0	0	4	1	4	0	0	0
Grc38_ENST00000384531|snRNA	0	3	2	0	0	1	2	0	3	1	0	0
Grc38_ENST00000384533|snoRNA	1	4	7	3	0	0	3	5	4	0	0	0
Grc38_ENST00000384549|snoRNA	1	8	5	0	0	0	7	5	8	0	0	0
Grc38_ENST00000384550|snoRNA	778	799	658	5388	6976	6607	716	1036	1338	2424	8043	2566
Grc38_ENST00000384561|snRNA	2	1	1	0	0	0	3	2	6	0	0	0
Grc38_ENST00000384567|snoRNA	5	7	8	0	0	0	6	0	12	0	0	0
Grc38_ENST00000384574|snoRNA	88	147	130	0	1	0	89	159	150	0	1	0
Grc38_ENST00000384581|snoRNA	26	61	37	1	2	5	21	34	56	5	8	1
Grc38_ENST00000384582|snRNA	3	2	3	0	0	0	4	0	7	0	0	1
Grc38_ENST00000384583|snoRNA	2	15	13	0	0	0	8	7	17	0	0	2
Grc38_ENST00000384584|snoRNA	8	23	18	0	1	0	10	18	18	3	0	2
Grc38_ENST00000384592|snRNA	7	13	9	29	18	24	4	13	17	87	56	158
Grc38_ENST00000384598|snRNA	2	2	3	0	0	0	0	0	4	0	0	0
Grc38_ENST00000384606|snRNA	9	41	53	0	0	1	7	20	55	1	1	0
Grc38_ENST00000384610|snRNA	85	218	223	80	72	65	83	184	297	962	254	1754
Grc38_ENST00000384613|snRNA	4	4	6	0	0	0	2	5	10	0	1	0
Grc38_ENST00000384614|snoRNA	0	4	1	0	0	0	3	4	4	0	0	0
Grc38_ENST00000384619|snRNA	238	574	396	22	33	48	304	380	434	661	119	1312
Grc38_ENST00000384645|snoRNA	2	6	9	0	0	0	7	7	3	0	0	0
Grc38_ENST00000384662|snoRNA	2	15	17	0	0	0	7	13	27	0	1	0
Grc38_ENST00000384674|snoRNA	24	35	37	3	0	0	26	39	46	6	1	9
Grc38_ENST00000384675|snoRNA	2	5	2	0	0	0	1	1	8	0	0	1
Grc38_ENST00000384679|snoRNA	9	9	15	0	0	0	6	14	37	1	1	0
Grc38_ENST00000384693|snoRNA	325	533	473	0	9	5	396	465	654	4	8	5
Grc38_ENST00000384706|snoRNA	170	405	362	0	1	0	174	322	167	0	0	0
Grc38_ENST00000384710|snRNA	0	6	7	1	0	0	2	1	6	0	0	0
Grc38_ENST00000384711|snoRNA	6	10	21	0	0	1	7	13	11	2	1	3
Grc38_ENST00000384714|snoRNA	143	279	236	2	2	2	196	265	174	3	4	3
Grc38_ENST00000384723|snRNA	3	12	22	0	0	0	3	11	26	0	0	0
Grc38_ENST00000384729|snoRNA	1	6	7	0	0	0	1	3	6	0	1	0
Grc38_ENST00000384737|snoRNA	1	5	0	0	0	0	0	1	8	0	0	0
Grc38_ENST00000384744|snoRNA	4	10	8	0	0	0	1	8	7	0	0	0
Grc38_ENST00000384756|snoRNA	314	729	749	0	2	3	368	448	425	2	4	0
Grc38_ENST00000384762|snoRNA	10	12	23	0	1	0	7	9	26	3	0	0
Grc38_ENST00000384765|snoRNA	93	136	191	1	1	0	44	108	50	2	2	1
Grc38_ENST00000384769|snoRNA	138	273	228	0	5	4	214	208	267	1	0	1
Grc38_ENST00000384770|snRNA	1	9	4	6	5	8	7	5	14	11	13	17
Grc38_ENST00000384771|snoRNA	69	3	7	0	0	0	0	0	12	0	0	0
Grc38_ENST00000384792|snoRNA	22	49	51	4	1	4	14	64	37	1	3	0
Grc38_ENST00000384816|miRNA	236	478	482	76	29	34	387	486	239	10	12	9
Grc38_ENST00000384819|miRNA	883	1082	910	611	220	347	1015	1115	357	228	244	238
Grc38_ENST00000384827|miRNA	8	5	7	0	0	0	11	7	2	0	0	0
Grc38_ENST00000384831|miRNA	24	41	42	6	1	2	25	54	32	1	1	3
Grc38_ENST00000384832|miRNA	236	579	337	33	13	17	486	651	286	8	17	6
Grc38_ENST00000384835|miRNA	1	0	1	45	15	13	0	1	0	2	3	5
Grc38_ENST00000384836|miRNA	0	1	3	16	75	2	1	2	0	0	0	2
Grc38_ENST00000384837|miRNA	60	64	41	27	10	20	66	59	23	6	7	12
Grc38_ENST00000384839|miRNA	22	0	0	22	0	0	104	0	1	14	5	0
Grc38_ENST00000384849|miRNA	749	1282	1074	129	50	63	1044	1593	860	3	31	19
Grc38_ENST00000384850|miRNA	31	52	35	0	1	2	54	37	24	0	3	1
Grc38_ENST00000384851|miRNA	1	4	4	0	0	1	0	0	1	0	0	0
Grc38_ENST00000384852|miRNA	64	83	65	17	4	9	90	163	94	5	18	0
Grc38_ENST00000384853|miRNA	18	17	15	7	5	6	30	40	35	0	6	0
Grc38_ENST00000384863|miRNA	264	465	332	138	60	71	796	723	232	33	46	24
Grc38_ENST00000384865|miRNA	175	180	199	31	1	13	134	117	59	5	10	4
Grc38_ENST00000384868|miRNA	20	23	9	3	1	2	4	11	8	2	2	0
Grc38_ENST00000384870|miRNA	1	11	9	5	1	1	7	8	11	1	0	0
Grc38_ENST00000384871|miRNA	58	31	34	21	15	6	67	97	105	2	10	4
Grc38_ENST00000384873|miRNA	420	555	558	337	119	245	523	566	208	53	130	69
Grc38_ENST00000384875|miRNA	0	1	1	0	4	0	4	2	2	0	2	0
Grc38_ENST00000384876|miRNA	202	303	165	55	28	24	267	236	102	16	13	7
Grc38_ENST00000384878|miRNA	3	3	3	4	0	0	12	6	4	0	1	0
Grc38_ENST00000384879|miRNA	50	49	51	18	11	6	77	78	36	8	8	5
Grc38_ENST00000384881|miRNA	8	5	9	0	0	0	18	14	5	0	2	0
Grc38_ENST00000384882|miRNA	65	70	45	59	26	21	73	86	29	9	23	11
Grc38_ENST00000384885|miRNA	752	967	833	277	88	97	1944	1603	966	54	91	35
Grc38_ENST00000384886|miRNA	0	0	0	58	7	12	0	1	1	3	1	3
Grc38_ENST00000384887|miRNA	1	2	3	0	0	0	3	1	3	0	0	0
Grc38_ENST00000384889|miRNA	232	214	233	249	76	114	258	154	173	30	41	12
Grc38_ENST00000384891|miRNA	2	0	0	0	5	0	0	0	1	1	0	1
Grc38_ENST00000384892|miRNA	20	11	7	1	1	0	29	19	5	1	0	1
Grc38_ENST00000384898|miRNA	39	38	41	16	12	7	69	83	102	2	7	0
Grc38_ENST00000384901|miRNA	34	43	28	19	4	9	45	39	26	4	2	2
Grc38_ENST00000384903|miRNA	0	1	3	0	0	0	2	3	2	0	0	0
Grc38_ENST00000384906|miRNA	378	545	360	354	62	104	177	578	170	33	32	22
Grc38_ENST00000384907|miRNA	73	90	48	10	3	3	73	64	24	3	4	6
Grc38_ENST00000384915|miRNA	58	10	17	30	10	18	100	33	14	1	5	3
Grc38_ENST00000384916|miRNA	1	5	2	0	0	0	3	1	0	0	0	0
Grc38_ENST00000384918|miRNA	174	256	158	76	38	46	331	343	186	29	41	25
Grc38_ENST00000384920|miRNA	10	9	1	0	0	0	0	0	6	0	0	0
Grc38_ENST00000384921|miRNA	291	318	286	313	71	151	419	244	261	34	81	59
Grc38_ENST00000384961|miRNA	1	6	2	1	1	0	10	9	8	1	0	0
Grc38_ENST00000384965|miRNA	4	4	4	5	5	2	16	9	15	0	2	0
Grc38_ENST00000384967|miRNA	587	1618	440	30	12	8	1618	1712	631	15	19	17
Grc38_ENST00000384970|miRNA	40	40	27	22	8	10	54	90	102	2	11	4
Grc38_ENST00000384972|miRNA	1	1	1	0	2	0	4	3	0	0	0	0
Grc38_ENST00000384973|miRNA	6	2	2	0	0	0	0	0	7	0	0	0
Grc38_ENST00000384976|miRNA	72	86	68	17	4	7	86	99	30	8	6	10
Grc38_ENST00000384979|miRNA	5	11	10	0	0	0	1	0	23	0	0	0
Grc38_ENST00000384980|miRNA	0	1	0	5	12	2	1	3	1	0	0	0
Grc38_ENST00000384981|miRNA	6	7	2	3	2	1	8	8	7	0	2	0
Grc38_ENST00000384988|miRNA	229	320	184	53	10	28	369	271	191	5	13	4
Grc38_ENST00000384992|miRNA	2938	3509	2301	2012	711	926	3399	2744	2896	430	713	279
Grc38_ENST00000384993|miRNA	90	113	158	40	1	9	227	217	86	5	12	6
Grc38_ENST00000384996|miRNA	13	16	31	0	0	0	0	0	29	0	0	0
Grc38_ENST00000384997|miRNA	1	1	2	1	4	4	1	5	0	0	0	0
Grc38_ENST00000384998|miRNA	7	9	4	0	0	0	0	0	3	0	0	0
Grc38_ENST00000384999|miRNA	53	82	47	9	3	5	59	66	62	0	1	0
Grc38_ENST00000385002|miRNA	0	0	4	0	0	0	0	0	6	0	0	0
Grc38_ENST00000385004|miRNA	74	223	144	62	23	30	238	292	186	10	24	10
Grc38_ENST00000385006|miRNA	62	41	41	8	4	5	53	73	49	0	2	0
Grc38_ENST00000385008|miRNA	1	1	1	0	0	0	7	2	1	0	0	0
Grc38_ENST00000385009|miRNA	111	141	117	148	59	64	155	194	111	16	37	11
Grc38_ENST00000385010|miRNA	87	93	68	21	7	20	115	63	51	3	9	3
Grc38_ENST00000385011|miRNA	610	527	314	835	102	159	1672	598	260	112	89	35
Grc38_ENST00000385012|miRNA	68	175	180	23	2	5	136	212	141	4	3	1
Grc38_ENST00000385015|miRNA	9	13	10	11	2	1	20	9	21	0	0	2
Grc38_ENST00000385016|miRNA	22	19	19	2	2	0	25	21	12	0	0	0
Grc38_ENST00000385018|miRNA	24	29	22	37	10	22	50	26	24	3	11	10
Grc38_ENST00000385019|miRNA	1491	2510	2191	192	46	104	2176	2792	1509	21	46	34
Grc38_ENST00000385020|miRNA	62	63	93	22	14	5	71	55	48	2	3	0
Grc38_ENST00000385021|miRNA	33	36	25	4	5	1	63	27	34	0	1	0
Grc38_ENST00000385022|miRNA	40	55	29	12	0	4	65	57	56	1	5	1
Grc38_ENST00000385024|miRNA	144	385	394	24	13	19	312	447	286	7	10	7
Grc38_ENST00000385025|miRNA	69	114	96	41	23	26	132	137	85	15	10	5
Grc38_ENST00000385026|miRNA	222	460	313	116	40	75	802	721	203	14	42	26
Grc38_ENST00000385028|miRNA	15	20	9	1	2	1	11	9	13	0	1	0
Grc38_ENST00000385029|miRNA	16	23	23	0	1	1	17	10	12	0	0	2
Grc38_ENST00000385032|miRNA	7	8	9	2	1	2	0	0	11	0	0	0
Grc38_ENST00000385037|miRNA	1	5	5	0	0	0	6	2	5	0	0	0
Grc38_ENST00000385043|miRNA	1728	3948	2689	1305	647	764	3471	7430	3352	305	986	279
Grc38_ENST00000385044|miRNA	1	1	4	1738	476	718	0	2	0	233	361	110
Grc38_ENST00000385045|miRNA	33	54	53	3	1	0	54	80	47	0	2	0
Grc38_ENST00000385047|miRNA	16	17	10	2	3	1	10	18	2	1	2	2
Grc38_ENST00000385048|miRNA	0	0	1	23	3	6	0	0	0	6	2	7
Grc38_ENST00000385050|miRNA	4	12	7	2	0	0	12	12	20	0	1	0
Grc38_ENST00000385051|miRNA	18	17	12	1	1	0	17	27	9	0	0	0
Grc38_ENST00000385052|miRNA	2	5	2	0	0	0	1	4	0	0	0	0
Grc38_ENST00000385054|miRNA	1797	2848	2126	786	232	417	2241	2257	1726	97	221	89
Grc38_ENST00000385055|miRNA	18	16	13	11	0	1	25	16	16	0	2	0
Grc38_ENST00000385056|miRNA	6	7	6	0	0	0	7	5	7	0	0	0
Grc38_ENST00000385059|miRNA	0	0	0	67	6	19	0	0	0	5	10	3
Grc38_ENST00000385060|miRNA	156	186	134	79	37	63	203	252	204	19	30	10
Grc38_ENST00000385065|miRNA	10	15	13	3	0	1	15	0	2	1	0	1
Grc38_ENST00000385070|miRNA	8	28	8	4	8	12	48	51	8	9	20	3
Grc38_ENST00000385073|miRNA	1220	1058	874	127	42	56	2456	1756	1196	24	39	22
Grc38_ENST00000385077|miRNA	11	24	12	5	0	3	25	25	14	0	0	2
Grc38_ENST00000385092|miRNA	499	639	784	224	81	122	2383	1068	722	75	128	56
Grc38_ENST00000385104|miRNA	5	1	3	0	0	0	5	2	0	0	0	0
Grc38_ENST00000385128|miRNA	1521	1911	950	242	71	74	2252	2404	573	49	119	50
Grc38_ENST00000385129|miRNA	1585	3247	2537	336	109	113	3887	4402	1909	31	83	53
Grc38_ENST00000385130|miRNA	43	89	92	4	1	1	162	123	65	2	1	2
Grc38_ENST00000385135|miRNA	2910	5221	3500	272	118	118	4931	5445	3971	64	148	40
Grc38_ENST00000385140|miRNA	2576	3252	2309	5628	2677	4195	3601	3291	1618	777	2344	766
Grc38_ENST00000385160|miRNA	8	1	1	3	6	3	0	3	11	1	7	1
Grc38_ENST00000385189|miRNA	1	1	2	4	0	0	8	0	0	2	0	0
Grc38_ENST00000385194|miRNA	8	15	12	5	0	2	9	8	8	0	1	0
Grc38_ENST00000385197|miRNA	3	4	6	3	0	1	9	6	9	0	0	0
Grc38_ENST00000385199|miRNA	273	322	271	139	29	84	273	268	151	14	45	18
Grc38_ENST00000385200|miRNA	3	3	4	25	1	5	2	0	2	1	4	1
Grc38_ENST00000385201|miRNA	4	22	12	7	4	4	19	37	13	3	8	4
Grc38_ENST00000385204|miRNA	1	0	1	5	0	3	0	0	0	0	1	0
Grc38_ENST00000385205|miRNA	2	2	2	3	1	1	0	0	1	0	1	0
Grc38_ENST00000385207|miRNA	54	61	38	15	4	7	108	71	72	2	5	1
Grc38_ENST00000385209|miRNA	334	386	332	180	87	145	336	330	176	24	66	32
Grc38_ENST00000385212|miRNA	214	414	412	99	34	41	435	678	269	11	38	11
Grc38_ENST00000385213|miRNA	46	97	69	22	25	20	83	68	31	12	20	22
Grc38_ENST00000385214|miRNA	135	253	166	20	11	7	147	294	100	2	13	2
Grc38_ENST00000385219|miRNA	2	4	0	0	0	1	6	2	5	0	0	0
Grc38_ENST00000385221|miRNA	17	28	47	0	0	0	1	0	35	0	0	0
Grc38_ENST00000385223|miRNA	0	3	2	0	1	0	11	18	9	0	1	0
Grc38_ENST00000385224|miRNA	8	7	5	1	0	0	4	6	13	0	0	0
Grc38_ENST00000385226|miRNA	0	4	1	0	0	0	5	1	2	0	0	0
Grc38_ENST00000385227|miRNA	105	205	186	24	5	11	286	204	95	2	9	4
Grc38_ENST00000385229|miRNA	0	2	1	0	1	1	4	5	4	0	1	1
Grc38_ENST00000385230|miRNA	25	20	14	19	3	4	26	31	17	1	4	2
Grc38_ENST00000385231|miRNA	7	8	9	1	0	0	19	12	5	0	0	0
Grc38_ENST00000385233|miRNA	538	674	453	218	114	126	531	684	428	84	105	62
Grc38_ENST00000385235|miRNA	12	46	27	5	0	5	38	43	19	0	2	0
Grc38_ENST00000385236|miRNA	1616	2108	991	281	86	102	2363	2699	598	52	122	60
Grc38_ENST00000385238|miRNA	9	8	9	2	0	1	14	13	6	2	1	1
Grc38_ENST00000385240|miRNA	69	165	115	47	24	32	220	216	138	15	22	10
Grc38_ENST00000385242|miRNA	9	17	21	0	0	0	0	0	23	0	0	0
Grc38_ENST00000385243|miRNA	10	10	15	1	0	0	16	14	10	0	0	0
Grc38_ENST00000385245|miRNA	446	660	372	20	7	5	963	1204	422	9	15	7
Grc38_ENST00000385253|miRNA	8	6	11	0	0	0	9	3	5	0	1	0
Grc38_ENST00000385254|miRNA	237	224	237	104	36	37	448	338	232	13	34	11
Grc38_ENST00000385258|miRNA	120	125	160	112	36	53	138	165	54	15	27	10
Grc38_ENST00000385259|miRNA	3250	3300	2421	3821	917	1195	5240	6219	1447	923	1434	545
Grc38_ENST00000385261|miRNA	1	4	2	1	0	4	6	1	3	0	0	2
Grc38_ENST00000385266|miRNA	35	31	21	3	1	0	39	33	16	3	2	0
Grc38_ENST00000385268|miRNA	13	9	12	8	2	1	16	10	3	2	1	2
Grc38_ENST00000385269|miRNA	9	16	5	1	3	2	13	9	4	3	2	2
Grc38_ENST00000385270|miRNA	88	128	142	32	10	15	88	161	114	4	8	2
Grc38_ENST00000385271|miRNA	27	52	44	12	5	3	56	72	56	1	0	3
Grc38_ENST00000385273|miRNA	1469	2284	1621	211	117	91	2100	2422	546	57	102	63
Grc38_ENST00000385274|miRNA	8	23	10	3	0	0	26	15	9	0	0	0
Grc38_ENST00000385277|miRNA	661	846	759	294	153	165	1551	1835	1254	52	166	49
Grc38_ENST00000385278|miRNA	15	27	27	1	0	0	26	23	6	0	0	4
Grc38_ENST00000385280|miRNA	6	18	12	0	0	0	13	13	8	0	1	0
Grc38_ENST00000385282|miRNA	130	205	171	42	11	18	505	400	144	9	9	10
Grc38_ENST00000385287|miRNA	19	7	5	3	0	5	16	2	7	0	2	0
Grc38_ENST00000385288|miRNA	65	110	116	13	3	4	135	193	94	0	7	1
Grc38_ENST00000385289|miRNA	1402	2455	2251	198	57	94	2114	2687	1384	16	52	27
Grc38_ENST00000385292|miRNA	76	76	49	65	16	31	62	53	23	8	23	10
Grc38_ENST00000385299|miRNA	493	651	407	231	104	113	504	599	365	51	106	68
Grc38_ENST00000385300|miRNA	8259	13242	5890	4319	1626	1305	18238	22657	17212	978	1665	994
Grc38_ENST00000385301|miRNA	72	128	108	26	4	8	110	145	64	4	2	9
Grc38_ENST00000385302|miRNA	822	1132	922	2811	2885	2477	658	1018	1336	1285	2933	1308
Grc38_ENST00000386037|snoRNA	22	38	47	2	0	1	28	40	30	3	1	1
Grc38_ENST00000386062|snoRNA	118	232	202	0	1	1	153	224	200	1	0	0
Grc38_ENST00000386157|snoRNA	10	14	28	0	0	0	10	17	15	0	0	0
Grc38_ENST00000386307|snoRNA	196	408	287	0	0	2	274	305	224	0	2	0
Grc38_ENST00000386683|snoRNA	11	16	23	0	4	2	15	16	17	0	0	1
Grc38_ENST00000386745|snoRNA	183	290	250	1	7	5	144	265	105	6	3	3
Grc38_ENST00000386747|snoRNA	77	148	187	1	6	1	84	137	93	1	5	0
Grc38_ENST00000386847|snoRNA	49	79	62	0	1	0	34	71	60	0	2	0
Grc38_ENST00000386910|snoRNA	2	14	7	3	0	2	12	6	7	1	0	0
Grc38_ENST00000386967|snoRNA	120	225	193	0	2	2	100	150	114	0	0	1
Grc38_ENST00000386972|miRNA	825	960	786	269	101	124	2022	1698	930	67	96	35
Grc38_ENST00000387069|snRNA	14	42	37	82	124	101	25	30	54	231	363	628
Grc38_ENST00000388006|miRNA	1	0	1	2	0	0	11	0	0	0	0	0
Grc38_ENST00000388090|snoRNA	3	3	1	0	0	0	3	0	8	0	3	0
Grc38_ENST00000388106|snRNA	2	6	3	0	0	0	1	5	6	0	0	0
Grc38_ENST00000388402|miRNA	1	2	3	0	0	0	7	0	3	0	0	0
Grc38_ENST00000390165|miRNA	6	5	9	3	1	2	4	2	5	0	3	0
Grc38_ENST00000390179|miRNA	3	11	3	0	0	0	0	0	4	0	0	0
Grc38_ENST00000390180|miRNA	3	10	8	1	0	0	14	14	11	0	0	1
Grc38_ENST00000390183|miRNA	16	67	56	10	3	10	32	46	19	3	7	2
Grc38_ENST00000390184|miRNA	0	1	6	0	0	0	2	0	2	0	1	0
Grc38_ENST00000390194|miRNA	59	117	141	0	0	0	0	0	134	0	0	0
Grc38_ENST00000390204|miRNA	10	14	15	1	1	3	15	16	11	0	2	1
Grc38_ENST00000390209|miRNA	20	13	13	35	2	9	21	17	7	3	9	3
Grc38_ENST00000390219|miRNA	1	3	1	1	0	0	1	4	0	1	0	0
Grc38_ENST00000390220|miRNA	11	7	6	11	4	7	1	2	0	2	2	0
Grc38_ENST00000390225|miRNA	39	54	48	10	4	2	47	45	23	1	4	0
Grc38_ENST00000390227|miRNA	30	55	61	4	3	0	61	57	32	2	5	0
Grc38_ENST00000390708|miRNA	28	60	11	4	1	2	34	93	70	0	2	0
Grc38_ENST00000390738|miRNA	22	52	36	2	2	2	56	56	29	1	1	2
Grc38_ENST00000390751|miRNA	116	81	64	249	64	140	124	80	57	35	66	22
Grc38_ENST00000390756|miRNA	13	21	14	3	5	4	5	14	8	2	5	1
Grc38_ENST00000390781|miRNA	14	41	34	0	0	0	0	0	31	0	0	0
Grc38_ENST00000390783|miRNA	4	9	6	0	1	0	3	5	5	0	1	0
Grc38_ENST00000390806|miRNA	37	40	0	0	0	0	0	1	3	0	0	0
Grc38_ENST00000390813|miRNA	0	0	3	2	0	0	3	0	4	0	0	1
Grc38_ENST00000390833|snoRNA	11	31	37	0	3	1	19	30	32	5	1	7
Grc38_ENST00000390842|snoRNA	14	4	17	0	0	0	23	16	30	0	0	0
Grc38_ENST00000390846|snoRNA	3	5	1	0	0	0	3	1	4	0	0	0
Grc38_ENST00000390856|snoRNA	85	138	144	5	1	6	103	140	70	2	3	4
Grc38_ENST00000390861|snoRNA	10	17	5	0	0	0	15	17	10	0	0	2
Grc38_ENST00000390868|snRNA	1	2	2	3	3	2	1	4	4	7	6	10
Grc38_ENST00000390870|snRNA	0	0	1	0	0	0	1	1	0	2	2	5
Grc38_ENST00000390880|snoRNA	2	8	7	1	0	0	4	6	5	0	1	0
Grc38_ENST00000390904|snoRNA	1	0	2	0	0	0	1	1	11	0	0	0
Grc38_ENST00000390909|snoRNA	6	4	1	0	0	0	2	0	1	0	0	0
Grc38_ENST00000390924|snRNA	4	5	10	0	0	0	0	0	5	0	0	1
Grc38_ENST00000390930|snoRNA	47	88	83	1	1	7	48	81	50	0	0	3
Grc38_ENST00000390981|snoRNA	40	58	45	0	5	2	35	45	23	0	6	3
Grc38_ENST00000390994|snoRNA	2	6	10	0	0	0	10	7	12	0	0	0
Grc38_ENST00000391002|snoRNA	32	77	65	1	0	0	39	40	55	0	1	0
Grc38_ENST00000391007|snoRNA	16	36	30	0	0	0	30	32	15	0	0	0
Grc38_ENST00000391040|snoRNA	7	27	20	0	0	0	1	3	27	0	0	0
Grc38_ENST00000391042|snRNA	1	1	4	0	0	0	0	0	4	1	0	0
Grc38_ENST00000391052|snRNA	11	9	9	0	1	1	4	0	3	1	0	1
Grc38_ENST00000391076|snoRNA	14	15	13	0	0	0	12	20	10	0	0	0
Grc38_ENST00000391078|snoRNA	7	2	0	0	0	0	0	0	1	0	0	0
Grc38_ENST00000391079|snoRNA	111	214	185	1	0	3	99	157	153	0	0	1
Grc38_ENST00000391100|snoRNA	19	13	21	0	0	2	10	10	23	0	0	0
Grc38_ENST00000391141|snoRNA	9	23	22	0	4	0	16	14	44	1	3	1
Grc38_ENST00000391145|snoRNA	26	25	35	0	3	1	35	39	27	0	0	2
Grc38_ENST00000391150|snoRNA	93	121	114	0	2	0	78	125	54	3	1	2
Grc38_ENST00000391162|snoRNA	13	39	41	0	0	0	7	20	39	0	0	0
Grc38_ENST00000391208|snRNA	5	17	30	0	0	1	2	12	29	0	0	0
Grc38_ENST00000391232|snoRNA	39	60	51	0	0	0	47	52	28	0	0	0
Grc38_ENST00000391239|snRNA	41	24	27	2	4	0	2	1	15	4	1	2
Grc38_ENST00000391249|snoRNA	18	15	5	0	1	1	0	0	12	0	1	0
Grc38_ENST00000391250|snoRNA	3	7	2	0	0	0	6	8	4	0	0	0
Grc38_ENST00000391270|snRNA	5	1	1	0	0	0	0	2	2	0	0	0
Grc38_ENST00000391279|snoRNA	0	4	3	0	0	0	0	1	2	0	0	0
Grc38_ENST00000391286|snoRNA	40	54	91	0	0	1	37	36	56	2	1	3
Grc38_ENST00000391303|snRNA	2	1	6	0	1	1	1	2	12	5	2	3
Grc38_ENST00000391305|snoRNA	9	11	15	0	1	1	12	13	13	1	6	2
Grc38_ENST00000391307|snRNA	0	0	0	2	0	1	0	0	0	3	1	13
Grc38_ENST00000391308|snoRNA	2	1	3	7	3	7	1	1	1	7	8	16
Grc38_ENST00000391313|snoRNA	6	8	4	0	1	0	8	10	3	0	0	1
Grc38_ENST00000401104|miRNA	9	6	2	0	1	5	1	1	1	0	0	1
Grc38_ENST00000401111|miRNA	1	4	3	6	2	1	1	2	3	1	0	0
Grc38_ENST00000401112|miRNA	2	3	0	0	0	0	1	0	5	0	0	0
Grc38_ENST00000401115|miRNA	20	8	11	0	0	2	0	0	8	0	0	0
Grc38_ENST00000401126|miRNA	4	5	0	1	0	0	0	0	4	0	0	0
Grc38_ENST00000401134|miRNA	5	9	2	0	0	2	0	0	4	0	0	0
Grc38_ENST00000401135|miRNA	9	3	1	0	1	1	2	3	8	0	0	1
Grc38_ENST00000401141|miRNA	0	1	9	0	0	0	0	0	1	0	0	0
Grc38_ENST00000401157|miRNA	6	7	2	0	0	2	1	0	3	0	0	0
Grc38_ENST00000401164|miRNA	6	5	8	0	0	4	2	1	6	0	1	0
Grc38_ENST00000401182|miRNA	10	16	17	8	1	0	20	39	37	1	1	0
Grc38_ENST00000401190|miRNA	7	22	15	1	0	0	7	11	10	0	0	1
Grc38_ENST00000401201|miRNA	15	14	7	0	0	1	0	0	2	2	1	0
Grc38_ENST00000401235|miRNA	21	14	8	0	0	0	0	2	8	0	0	2
Grc38_ENST00000401258|miRNA	3	6	6	1	0	0	0	2	1	0	0	0
Grc38_ENST00000401269|miRNA	1	5	2	0	0	1	2	1	6	1	2	0
Grc38_ENST00000401276|miRNA	2	3	0	0	0	2	1	2	3	0	0	1
Grc38_ENST00000401280|miRNA	8	14	15	8	2	10	22	23	19	1	4	2
Grc38_ENST00000401297|miRNA	17	27	9	6	3	4	11	7	9	0	2	0
Grc38_ENST00000401312|miRNA	106	66	41	0	0	5	0	1	30	0	2	0
Grc38_ENST00000401325|miRNA	11	13	4	0	1	0	0	3	5	0	2	1
Grc38_ENST00000401335|miRNA	94	55	27	0	2	0	0	1	26	0	0	0
Grc38_ENST00000401347|miRNA	1182	870	306	0	0	0	0	2	253	0	0	0
Grc38_ENST00000401360|miRNA	2	1	2	3	0	4	2	0	0	1	1	0
Grc38_ENST00000401372|miRNA	9	14	7	1	0	0	2	1	3	0	1	1
Grc38_ENST00000408061|snoRNA	11	16	17	0	0	0	17	20	8	0	0	2
Grc38_ENST00000408078|miRNA	1	3	1	0	0	0	0	3	2	0	0	1
Grc38_ENST00000408103|miRNA	1	6	4	0	0	0	0	0	4	0	0	0
Grc38_ENST00000408110|miRNA	8	4	2	0	0	0	2	1	0	0	0	0
Grc38_ENST00000408124|miRNA	1	3	0	1	1	1	1	4	4	2	8	0
Grc38_ENST00000408135|miRNA	2	3	4	1	0	0	1	3	1	1	2	0
Grc38_ENST00000408136|miRNA	9	29	13	1	0	0	34	39	9	0	0	1
Grc38_ENST00000408139|snoRNA	7	13	12	0	0	2	6	8	9	0	0	0
Grc38_ENST00000408154|miRNA	1	2	0	3	0	0	0	1	0	0	2	3
Grc38_ENST00000408189|snoRNA	94	162	137	1	0	1	88	134	96	0	2	0
Grc38_ENST00000408196|miRNA	7	7	2	1	0	1	0	0	1	0	0	1
Grc38_ENST00000408203|miRNA	1	4	6	0	0	0	2	0	1	0	0	0
Grc38_ENST00000408236|miRNA	1	2	1	0	2	2	0	1	2	2	0	0
Grc38_ENST00000408240|miRNA	5	25	17	54	71	48	6	15	21	22	47	12
Grc38_ENST00000408243|miRNA	2	5	7	2	2	2	5	6	2	0	0	0
Grc38_ENST00000408247|miRNA	11	11	8	0	0	0	0	0	10	0	0	0
Grc38_ENST00000408259|miRNA	0	0	2	0	0	0	0	0	2	4	0	3
Grc38_ENST00000408276|miRNA	7	6	8	2	0	0	3	0	6	0	1	0
Grc38_ENST00000408310|miRNA	1	9	2	0	0	0	0	0	0	0	1	0
Grc38_ENST00000408311|miRNA	1	0	2	8	0	0	3	0	0	0	0	0
Grc38_ENST00000408314|snoRNA	19	20	24	0	0	0	8	14	15	1	0	1
Grc38_ENST00000408337|miRNA	3	0	40	0	0	0	0	0	19	0	0	0
Grc38_ENST00000408338|miRNA	3	16	2	2	0	0	1	1	2	0	0	0
Grc38_ENST00000408359|miRNA	0	0	0	2	1	0	1	0	0	1	1	4
Grc38_ENST00000408369|miRNA	1	9	1	0	0	0	0	1	5	0	0	0
Grc38_ENST00000408373|snoRNA	61	86	94	0	0	1	87	90	51	0	1	1
Grc38_ENST00000408376|snoRNA	14	22	27	0	0	0	14	25	45	0	0	0
Grc38_ENST00000408406|miRNA	2	5	5	4	0	0	1	3	2	0	0	0
Grc38_ENST00000408438|miRNA	1	1	1	6	0	5	2	1	0	0	4	1
Grc38_ENST00000408439|miRNA	4	5	2	2	6	5	2	3	1	0	0	0
Grc38_ENST00000408467|miRNA	1	0	1	0	0	1	1	0	1	3	2	0
Grc38_ENST00000408468|miRNA	2	8	3	0	0	0	1	4	3	0	0	0
Grc38_ENST00000408479|miRNA	16	15	17	21	9	6	9	21	10	5	5	5
Grc38_ENST00000408492|miRNA	5	17	7	3	0	0	9	15	15	0	0	0
Grc38_ENST00000408493|snoRNA	12	20	28	0	1	1	9	9	57	0	2	1
Grc38_ENST00000408518|miRNA	14	25	22	2	5	4	19	11	8	0	8	2
Grc38_ENST00000408520|miRNA	7	2	3	1	0	0	0	0	3	0	0	0
Grc38_ENST00000408521|miRNA	4	5	3	1	0	0	0	1	1	0	0	0
Grc38_ENST00000408534|snoRNA	3	5	7	1	1	0	5	3	7	1	0	0
Grc38_ENST00000408536|miRNA	4	6	9	0	0	2	11	3	2	0	0	0
Grc38_ENST00000408537|miRNA	10	10	10	2	1	2	13	19	1	0	1	2
Grc38_ENST00000408564|snoRNA	12	22	12	0	0	0	10	12	15	0	1	0
Grc38_ENST00000408566|miRNA	15	9	9	19	3	7	7	9	9	2	3	0
Grc38_ENST00000408569|snoRNA	4	4	2	0	0	0	3	2	2	1	0	1
Grc38_ENST00000408573|snoRNA	99	205	149	4	16	4	128	136	75	3	2	1
Grc38_ENST00000408575|miRNA	3	1	2	0	1	1	0	1	3	0	0	0
Grc38_ENST00000408583|miRNA	6	8	2	0	0	0	5	2	1	0	0	0
Grc38_ENST00000408587|snoRNA	12	13	6	0	0	1	16	14	5	0	0	0
Grc38_ENST00000408593|miRNA	1	4	1	0	1	1	2	3	2	1	1	1
Grc38_ENST00000408601|miRNA	3	1	2	0	0	0	2	1	3	0	0	0
Grc38_ENST00000408612|snoRNA	158	316	255	5	4	7	174	238	161	0	1	0
Grc38_ENST00000408613|miRNA	28	53	36	21	10	11	36	24	23	8	12	6
Grc38_ENST00000408625|miRNA	13	17	17	2	2	1	5	10	3	0	5	3
Grc38_ENST00000408637|snRNA	4	3	1	0	0	0	0	0	1	0	0	1
Grc38_ENST00000408658|miRNA	1	2	2	2	0	0	3	5	2	1	0	0
Grc38_ENST00000408662|miRNA	3	6	1	0	0	0	0	0	0	0	0	0
Grc38_ENST00000408683|miRNA	5	3	2	0	0	0	1	1	2	0	0	0
Grc38_ENST00000408685|miRNA	1	5	1	0	0	0	1	0	2	0	2	0
Grc38_ENST00000408687|miRNA	9	18	9	0	0	0	10	15	7	1	0	0
Grc38_ENST00000408692|miRNA	2	3	3	0	0	0	0	1	0	0	1	0
Grc38_ENST00000408704|miRNA	0	0	14	0	0	1	0	0	11	0	0	0
Grc38_ENST00000408716|snoRNA	3	3	5	0	0	0	8	5	16	0	1	0
Grc38_ENST00000408729|miRNA	0	1	1	2	3	1	0	2	0	0	0	2
Grc38_ENST00000408735|miRNA	2	1	2	0	0	0	1	0	4	0	0	0
Grc38_ENST00000408737|miRNA	1	7	5	0	0	1	1	0	1	1	1	0
Grc38_ENST00000408746|snoRNA	12	12	8	1	0	1	0	0	7	1	2	0
Grc38_ENST00000408749|snRNA	10	17	15	0	0	0	13	8	24	0	0	0
Grc38_ENST00000408789|snoRNA	5	9	11	1	0	0	1	14	6	0	0	0
Grc38_ENST00000408790|miRNA	20	26	9	0	1	1	3	3	14	0	2	1
Grc38_ENST00000408805|miRNA	1	5	3	0	0	0	1	0	1	0	0	2
Grc38_ENST00000408806|miRNA	1	1	1	2	1	0	0	2	3	1	2	2
Grc38_ENST00000408813|snoRNA	101	109	193	1	0	1	129	107	123	0	1	2
Grc38_ENST00000408818|miRNA	2	2	2	1	0	0	3	4	2	0	0	0
Grc38_ENST00000408827|miRNA	21	70	40	4	2	1	51	119	15	2	5	4
Grc38_ENST00000408840|miRNA	181	293	303	168	66	57	301	326	108	58	69	39
Grc38_ENST00000408847|miRNA	1	0	2	5	1	0	1	3	1	0	0	0
Grc38_ENST00000408865|miRNA	0	3	1	0	2	3	1	0	2	2	1	2
Grc38_ENST00000408876|snoRNA	1	3	2	0	0	0	1	2	3	0	0	0
Grc38_ENST00000410135|snRNA	30	23	22	4	4	3	4	8	25	5	10	13
Grc38_ENST00000410144|snRNA	18	35	32	0	1	2	11	22	61	1	2	0
Grc38_ENST00000410162|snRNA	1	3	3	2	2	2	2	2	6	0	4	2
Grc38_ENST00000410194|snRNA	2	4	0	0	1	0	0	0	2	0	2	1
Grc38_ENST00000410207|snRNA	4	4	3	0	0	0	0	1	1	0	0	0
Grc38_ENST00000410253|snoRNA	2	5	12	1	0	0	10	5	2	0	0	0
Grc38_ENST00000410287|miRNA	0	2	0	0	0	0	0	0	1	5	0	6
Grc38_ENST00000410290|snRNA	4	6	2	0	0	0	0	4	9	0	0	0
Grc38_ENST00000410294|miRNA	2	4	6	0	0	0	0	0	2	0	0	0
Grc38_ENST00000410299|snRNA	0	1	2	0	0	0	0	0	9	0	0	0
Grc38_ENST00000410306|snRNA	2	5	1	0	0	0	1	4	8	0	0	0
Grc38_ENST00000410344|snRNA	14	33	41	19	18	17	16	28	67	12	45	6
Grc38_ENST00000410361|snRNA	76	169	172	30	24	11	68	150	356	11	32	20
Grc38_ENST00000410394|miRNA	2	2	1	4	0	0	2	0	1	0	0	1
Grc38_ENST00000410396|snRNA	501	1406	1146	39	51	45	487	768	2582	18	80	24
Grc38_ENST00000410413|snoRNA	9	30	17	0	0	0	26	35	26	0	0	0
Grc38_ENST00000410423|snRNA	17	18	13	8	6	4	2	6	24	0	14	2
Grc38_ENST00000410425|snRNA	5	3	5	0	0	0	0	0	3	0	1	0
Grc38_ENST00000410433|snoRNA	199	389	379	0	2	1	197	336	434	1	4	1
Grc38_ENST00000410438|snoRNA	5	9	2	0	0	2	1	6	5	0	0	1
Grc38_ENST00000410457|snRNA	10	25	30	3	3	2	12	16	68	0	2	1
Grc38_ENST00000410482|snRNA	107	260	196	11	10	9	105	140	503	1	10	7
Grc38_ENST00000410506|snRNA	77	66	48	2	3	0	3	2	55	1	0	0
Grc38_ENST00000410507|snRNA	5	2	3	0	1	0	1	2	8	1	1	1
Grc38_ENST00000410545|snRNA	42	147	127	6	6	7	47	78	238	7	3	8
Grc38_ENST00000410554|snRNA	2	1	3	1	0	1	0	0	0	2	0	1
Grc38_ENST00000410557|snoRNA	9	15	17	0	0	0	7	18	19	0	3	1
Grc38_ENST00000410600|miRNA	1	1	0	34	6	6	0	2	0	10	5	5
Grc38_ENST00000410604|snRNA	2	2	7	0	0	1	1	0	3	0	0	0
Grc38_ENST00000410650|snRNA	1	7	0	1	0	1	0	1	2	0	2	0
Grc38_ENST00000410675|snRNA	4	5	1	0	0	0	0	1	4	0	0	0
Grc38_ENST00000410680|snRNA	0	4	1	0	0	0	1	0	6	0	0	0
Grc38_ENST00000410694|snRNA	29	110	144	33	15	12	25	83	223	9	46	7
Grc38_ENST00000410695|snRNA	4	31	12	39	11	16	8	7	20	8	43	9
Grc38_ENST00000410708|snRNA	6	24	17	4	7	1	10	7	37	2	14	0
Grc38_ENST00000410712|snRNA	5	38	31	1	4	1	7	19	64	0	0	0
Grc38_ENST00000410718|snRNA	6	9	10	0	0	0	3	5	20	1	1	0
Grc38_ENST00000410727|snRNA	6	2	2	0	0	0	0	0	5	0	0	0
Grc38_ENST00000410754|snRNA	2	1	3	0	0	1	0	1	3	0	0	0
Grc38_ENST00000410792|snRNA	0	2	1	0	0	0	1	3	5	0	0	0
Grc38_ENST00000410794|snRNA	5	17	11	29	20	17	9	18	14	11	49	11
Grc38_ENST00000410818|snRNA	136	386	313	0	0	1	133	249	326	0	4	0
Grc38_ENST00000410829|snRNA	8	11	1	1	0	0	0	3	5	0	0	0
Grc38_ENST00000410845|snRNA	7	9	5	1	5	3	3	1	10	1	6	1
Grc38_ENST00000410858|snRNA	3	8	7	0	0	0	3	3	10	0	0	0
Grc38_ENST00000410878|snRNA	2	5	8	10	3	2	4	3	16	1	7	3
Grc38_ENST00000410889|snRNA	2	4	1	0	0	0	0	2	2	0	0	0
Grc38_ENST00000410967|miRNA	3	5	2	0	0	0	0	1	5	1	0	0
Grc38_ENST00000410991|snRNA	24	63	54	2	1	2	15	38	107	2	0	0
Grc38_ENST00000411013|miRNA	9	12	12	0	0	0	0	0	14	0	0	0
Grc38_ENST00000411041|snRNA	29	27	35	0	0	0	0	1	36	0	0	0
Grc38_ENST00000411053|snRNA	9	15	31	0	0	0	10	16	34	1	0	0
Grc38_ENST00000411054|snRNA	2	4	6	0	0	0	1	2	2	1	0	2
Grc38_ENST00000411069|snRNA	13	33	46	28	17	16	12	37	84	10	50	6
Grc38_ENST00000411132|snRNA	23	31	68	0	0	0	0	0	42	0	0	0
Grc38_ENST00000411164|snRNA	0	2	0	0	1	0	1	1	6	0	0	0
Grc38_ENST00000411175|snRNA	0	0	3	0	0	0	0	3	5	0	0	0
Grc38_ENST00000411193|snRNA	3	2	4	2	0	1	1	3	5	0	0	0
Grc38_ENST00000411224|snRNA	1	3	6	1	1	2	3	1	8	1	0	2
Grc38_ENST00000411232|miRNA	13	31	12	0	0	0	0	0	23	0	0	0
Grc38_ENST00000411247|snRNA	1	1	1	0	0	0	0	0	4	23	0	16
Grc38_ENST00000411266|snRNA	29	44	37	1	2	0	2	7	54	0	1	0
Grc38_ENST00000411292|snoRNA	57	108	84	0	1	0	81	100	54	0	0	1
Grc38_ENST00000411315|snRNA	15	29	27	0	3	3	15	29	41	1	2	2
Grc38_ENST00000411343|miRNA	38	37	1	0	0	0	0	0	2	0	0	0
Grc38_ENST00000411381|snRNA	6	1	1	0	0	0	0	0	4	0	0	0
Grc38_ENST00000411404|snRNA	66	163	194	13	7	15	74	98	283	1	13	3
Grc38_ENST00000413522|snoRNA	41	89	102	0	0	0	31	66	43	0	0	0
Grc38_ENST00000428514|snoRNA	33	34	32	0	0	1	73	51	29	2	1	7
Grc38_ENST00000439232|snoRNA	25	31	29	0	1	2	8	28	32	0	3	1
Grc38_ENST00000448188|snoRNA	202	313	258	4	7	13	201	260	143	9	10	4
Grc38_ENST00000458762|snoRNA	3	4	5	0	0	0	1	3	3	0	0	0
Grc38_ENST00000458770|snoRNA	73	110	91	0	2	3	45	73	41	0	1	1
Grc38_ENST00000458790|snoRNA	6	5	8	0	0	0	5	8	20	0	0	0
Grc38_ENST00000458806|snoRNA	29	42	0	0	0	0	0	1	5	0	0	0
Grc38_ENST00000458811|snRNA	0	0	0	3	4	0	0	2	1	0	4	1
Grc38_ENST00000458838|snoRNA	28	25	20	0	0	0	39	27	29	0	2	0
Grc38_ENST00000458841|snRNA	0	8	13	0	0	0	2	3	12	0	0	0
Grc38_ENST00000458892|snoRNA	25	34	31	0	0	0	27	33	29	0	1	1
Grc38_ENST00000458893|snoRNA	99	170	111	0	0	2	111	145	91	0	2	0
Grc38_ENST00000458896|miRNA	16	24	16	17	31	28	16	28	19	8	46	8
Grc38_ENST00000458922|snoRNA	23	21	27	0	0	0	0	1	26	0	0	0
Grc38_ENST00000458974|snoRNA	17	25	38	0	0	0	45	20	18	0	0	0
Grc38_ENST00000459004|snoRNA	4	10	18	0	0	0	5	14	13	1	1	0
Grc38_ENST00000459083|snoRNA	15	35	18	0	0	0	14	15	32	0	0	2
Grc38_ENST00000459124|snoRNA	45	75	68	0	1	2	68	68	133	0	0	0
Grc38_ENST00000459126|snoRNA	4	10	1	0	0	0	2	27	12	0	0	0
Grc38_ENST00000459128|snoRNA	0	2	1	0	0	0	2	4	1	1	0	0
Grc38_ENST00000459155|snoRNA	19	23	16	0	0	1	10	20	9	2	0	0
Grc38_ENST00000459157|snoRNA	2	5	3	0	0	0	2	1	2	0	0	0
Grc38_ENST00000459159|snoRNA	91	177	169	0	0	0	106	160	94	0	0	0
Grc38_ENST00000459163|snoRNA	178	156	141	9	3	0	292	195	127	1	0	0
Grc38_ENST00000459170|miRNA	10	2	4	23	19	33	9	10	5	14	46	16
Grc38_ENST00000459174|snoRNA	16	18	18	2	0	0	23	18	19	0	0	0
Grc38_ENST00000459187|snoRNA	71	119	95	1	3	1	77	105	127	2	0	0
Grc38_ENST00000459191|snRNA	34	45	29	0	0	0	1	0	27	0	0	0
Grc38_ENST00000459229|snoRNA	5	9	6	0	1	0	5	9	11	0	0	0
Grc38_ENST00000459249|snRNA	1	1	1	0	1	0	5	3	1	0	0	0
Grc38_ENST00000459255|snoRNA	12	17	3	2	0	0	5	13	14	0	0	1
Grc38_ENST00000459274|snRNA	11	23	18	245	338	307	7	12	58	203	1112	321
Grc38_ENST00000459299|snoRNA	60	187	176	0	1	5	78	116	122	0	0	1
Grc38_ENST00000459334|snRNA	1	0	5	0	0	0	0	1	7	0	0	0
Grc38_ENST00000459342|snoRNA	135	198	224	0	0	0	231	213	122	0	1	1
Grc38_ENST00000459386|snoRNA	8	20	11	0	0	0	13	12	19	0	0	0
Grc38_ENST00000459421|miRNA	5	6	9	12	5	6	7	8	3	7	7	3
Grc38_ENST00000459433|snoRNA	19	34	27	0	1	1	33	22	16	0	1	2
Grc38_ENST00000459473|snoRNA	33	48	25	0	0	3	68	59	37	1	1	1
Grc38_ENST00000459475|snoRNA	10	20	13	0	0	0	12	19	18	0	0	0
Grc38_ENST00000459491|snRNA	74	84	4	0	0	0	0	0	2	0	0	0
Grc38_ENST00000459500|snRNA	0	0	0	0	0	0	0	1	1	2	2	4
Grc38_ENST00000459538|snoRNA	3	2	2	0	0	1	5	3	1	0	0	0
Grc38_ENST00000459577|snoRNA	4	3	2	0	0	0	1	2	2	0	0	0
Grc38_ENST00000459579|snoRNA	1117	1643	2088	8	10	15	805	1406	1220	2	4	6
Grc38_ENST00000459584|snoRNA	14	21	37	0	0	0	19	21	19	0	1	1
Grc38_ENST00000459585|miRNA	252	132	61	3	3	2	41	16	72	2	2	8
Grc38_ENST00000459623|snoRNA	25	42	60	0	0	0	22	20	43	1	2	0
Grc38_ENST00000463508|miRNA	8	6	9	6	2	5	11	15	4	3	10	4
Grc38_ENST00000468851|miRNA	1	2	0	1	0	0	1	3	2	0	1	2
Grc38_ENST00000488123|miRNA	3132	2551	1148	1117	893	872	1044	2940	1659	415	1202	394
Grc38_ENST00000505219|snoRNA	12	27	29	0	0	5	11	13	23	0	0	0
Grc38_ENST00000515909|snRNA	8	14	19	1	0	0	2	15	22	0	0	0
Grc38_ENST00000515916|miRNA	2	5	8	0	0	0	2	6	1	0	0	0
Grc38_ENST00000515939|snRNA	2	1	2	0	0	0	4	2	2	0	0	0
Grc38_ENST00000515945|snRNA	0	1	1	0	1	1	3	1	5	0	0	0
Grc38_ENST00000515969|snoRNA	0	4	1	1	0	0	0	3	3	0	0	0
Grc38_ENST00000516006|snoRNA	3	4	1	0	0	1	3	1	0	0	0	0
Grc38_ENST00000516050|snRNA	8	10	12	2	12	11	2	10	12	2	7	1
Grc38_ENST00000516053|miRNA	1	1	1	4	1	0	1	0	1	1	0	0
Grc38_ENST00000516061|snRNA	4	17	13	0	0	1	6	7	18	0	0	0
Grc38_ENST00000516066|snRNA	7	15	14	0	1	0	0	0	12	0	0	0
Grc38_ENST00000516068|snRNA	3	20	18	0	0	0	7	4	10	0	0	1
Grc38_ENST00000516077|snRNA	4	2	4	0	0	0	0	0	2	0	0	0
Grc38_ENST00000516078|snRNA	0	8	3	0	1	0	0	0	7	1	2	1
Grc38_ENST00000516086|snRNA	10	17	22	0	0	1	0	0	28	0	0	2
Grc38_ENST00000516087|snoRNA	1	6	6	0	0	0	0	4	3	0	1	0
Grc38_ENST00000516131|snoRNA	2	7	2	0	0	0	3	6	6	0	0	0
Grc38_ENST00000516145|snRNA	1	22	23	0	0	0	0	10	15	0	1	0
Grc38_ENST00000516146|snRNA	10	17	25	0	0	0	15	16	34	0	1	0
Grc38_ENST00000516160|miRNA	13	13	21	0	0	0	0	0	12	0	0	0
Grc38_ENST00000516162|snRNA	3	4	3	0	0	0	0	1	2	0	1	0
Grc38_ENST00000516165|snoRNA	3	6	4	0	2	0	1	1	5	0	0	0
Grc38_ENST00000516180|miRNA	11	10	3	0	0	1	0	1	8	1	1	0
Grc38_ENST00000516191|snoRNA	2	1	0	0	0	0	1	0	5	0	1	0
Grc38_ENST00000516209|snRNA	46	109	104	2	5	6	37	65	183	0	2	1
Grc38_ENST00000516217|snRNA	0	9	15	1	0	0	0	6	13	0	0	0
Grc38_ENST00000516218|snRNA	2	4	3	0	0	0	0	1	5	1	1	1
Grc38_ENST00000516221|snRNA	28	34	55	0	0	0	1	1	60	0	0	0
Grc38_ENST00000516231|snoRNA	1	1	2	1	2	0	0	3	2	1	0	1
Grc38_ENST00000516236|snoRNA	5	3	6	8	10	7	3	3	9	2	6	3
Grc38_ENST00000516254|snRNA	13	5	2	0	0	0	0	0	3	0	0	0
Grc38_ENST00000516272|snRNA	2	6	1	0	0	0	0	1	0	0	0	0
Grc38_ENST00000516316|snRNA	4	0	2	0	0	3	0	0	1	0	0	0
Grc38_ENST00000516327|snoRNA	17	35	26	0	0	0	19	35	10	0	0	0
Grc38_ENST00000516336|snRNA	10	36	50	0	1	3	6	21	61	0	1	0
Grc38_ENST00000516337|miRNA	0	0	0	0	0	0	0	0	0	12	0	18
Grc38_ENST00000516339|snRNA	4	3	1	0	0	0	1	2	2	0	0	0
Grc38_ENST00000516375|snRNA	2	1	0	0	0	0	2	2	4	0	0	0
Grc38_ENST00000516387|miRNA	173	100	48	0	0	0	1	0	36	0	0	0
Grc38_ENST00000516403|snRNA	17	17	7	0	1	2	3	8	24	0	2	0
Grc38_ENST00000516404|snoRNA	2	5	3	0	0	0	2	0	10	0	1	0
Grc38_ENST00000516405|snRNA	6	10	13	0	0	0	1	0	9	0	0	1
Grc38_ENST00000516438|snRNA	7	35	49	2	2	0	9	25	56	0	0	0
Grc38_ENST00000516446|snRNA	7	11	3	0	0	0	4	4	9	0	0	0
Grc38_ENST00000516449|snoRNA	3	12	5	0	0	2	5	10	7	0	0	0
Grc38_ENST00000516461|miRNA	18	27	19	43	31	62	28	35	6	8	45	7
Grc38_ENST00000516468|snoRNA	2	2	3	0	0	0	2	0	2	0	0	0
Grc38_ENST00000516479|snRNA	19	34	39	0	0	0	0	0	36	0	0	0
Grc38_ENST00000516481|snoRNA	8	13	6	0	0	0	1	0	12	0	0	0
Grc38_ENST00000516488|snRNA	7	3	4	0	0	0	0	2	9	0	1	0
Grc38_ENST00000516502|snRNA	0	0	1	1	0	1	0	0	2	11	4	15
Grc38_ENST00000516517|snoRNA	0	2	2	0	0	0	2	0	4	0	0	0
Grc38_ENST00000516518|snRNA	1	3	2	1	0	0	3	1	6	0	0	0
Grc38_ENST00000516523|snRNA	4	6	4	0	0	0	0	1	5	5	0	3
Grc38_ENST00000516528|snoRNA	8	11	18	0	1	0	10	12	18	0	0	0
Grc38_ENST00000516531|miRNA	0	3	2	1	1	1	0	4	5	1	10	5
Grc38_ENST00000516540|snoRNA	10	6	10	0	0	0	5	6	14	0	0	0
Grc38_ENST00000516543|snoRNA	2	3	8	0	0	0	0	0	3	0	0	0
Grc38_ENST00000516564|snRNA	7	36	59	0	1	1	4	18	58	1	0	0
Grc38_ENST00000516574|snRNA	0	0	13	0	0	0	0	0	15	0	0	0
Grc38_ENST00000516581|snRNA	20	37	19	2	0	2	3	13	28	0	3	2
Grc38_ENST00000516585|snRNA	2	2	4	1	0	0	0	3	4	1	0	0
Grc38_ENST00000516612|snRNA	1	2	2	0	3	2	1	2	3	2	6	1
Grc38_ENST00000516652|snoRNA	0	0	0	1	1	5	0	2	1	2	5	1
Grc38_ENST00000516659|snRNA	1	5	7	9	15	7	2	4	13	5	16	10
Grc38_ENST00000516708|snoRNA	6	9	8	1	0	0	4	9	5	0	1	0
Grc38_ENST00000516710|snRNA	4	9	11	0	0	0	0	0	5	0	0	0
Grc38_ENST00000516712|snRNA	2	11	9	0	0	0	0	9	21	0	0	0
Grc38_ENST00000516736|snRNA	10	10	15	1	4	0	1	6	6	3	2	0
Grc38_ENST00000516747|snRNA	1	3	5	0	0	0	1	4	3	0	0	0
Grc38_ENST00000516752|snRNA	1	2	3	2	1	1	1	1	3	0	0	0
Grc38_ENST00000516775|miRNA	14	20	18	46	41	76	23	36	9	5	50	9
Grc38_ENST00000516795|snRNA	2	2	3	0	0	0	0	1	5	0	1	0
Grc38_ENST00000516810|snRNA	10	5	1	1	0	0	1	0	2	6	0	2
Grc38_ENST00000516827|snRNA	1	10	13	0	0	0	2	4	11	1	0	0
Grc38_ENST00000516830|snRNA	4	16	10	9	3	8	4	6	12	0	6	8
Grc38_ENST00000516842|snRNA	3	7	4	0	0	2	2	0	0	1	0	0
Grc38_ENST00000516873|snoRNA	4	6	7	0	1	0	4	6	5	0	0	0
Grc38_ENST00000516922|miRNA	16	21	26	0	0	0	0	0	13	0	0	0
Grc38_ENST00000516967|snRNA	2	5	1	0	0	0	3	3	0	0	0	0
Grc38_ENST00000516995|snRNA	0	5	14	0	0	0	0	6	17	0	0	0
Grc38_ENST00000517002|miRNA	4	2	2	0	0	0	0	0	1	0	0	1
Grc38_ENST00000517038|snRNA	13	44	47	5	2	2	14	35	101	0	2	0
Grc38_ENST00000517041|snRNA	14	35	30	0	2	1	13	18	44	0	2	1
Grc38_ENST00000517051|snRNA	0	1	27	0	0	0	0	1	29	0	0	0
Grc38_ENST00000517121|snRNA	10	2	2	0	1	1	1	0	3	1	0	2
Grc38_ENST00000517162|snRNA	3	4	2	0	0	0	0	1	1	0	0	0
Grc38_ENST00000517181|snRNA	4	7	7	0	0	0	0	0	8	0	0	0
Grc38_ENST00000517186|snRNA	8	29	3	0	0	0	0	0	2	0	0	0
Grc38_ENST00000517189|snRNA	15	22	38	0	0	0	0	0	27	0	0	0
Grc38_ENST00000517199|miRNA	3	1	3	0	0	0	6	5	6	0	0	0
Grc38_ENST00000517228|miRNA	3	1	0	0	0	0	0	1	0	11	0	14
Grc38_ENST00000517238|snoRNA	37	34	23	0	0	0	4	2	33	0	1	0
Grc38_ENST00000517242|snoRNA	28	56	71	4	0	0	26	71	31	0	0	1
Grc38_ENST00000517277|snRNA	8	19	36	1	0	0	4	13	37	0	0	0
Grc38_ENST00000517280|snRNA	0	1	3	4	9	10	0	2	9	4	61	24
Grc38_ENST00000517281|snoRNA	3	8	6	0	3	4	2	6	10	0	4	0
Grc38_ENST00000517283|snoRNA	35	40	26	0	4	1	4	5	19	0	1	1
Grc38_ENST00000517285|snoRNA	8	2	7	0	0	0	2	4	2	0	0	0
Grc38_ENST00000517288|snRNA	3	3	10	0	0	0	2	3	9	0	0	0
Grc38_ENST00000517290|snRNA	2	10	6	0	0	0	2	6	12	0	0	0
Grc38_ENST00000521276|miRNA	476	603	713	407	107	183	731	881	390	82	119	40
Grc38_ENST00000522581|snRNA	3	2	2	0	1	0	0	5	3	0	2	1
Grc38_ENST00000571722|snoRNA	75	129	104	10	6	6	75	90	137	3	15	1
Grc38_ENST00000572520|miRNA	4	9	1	0	1	0	1	1	2	0	0	0
Grc38_ENST00000572849|snRNA	6	10	9	3	6	8	5	9	24	8	7	17
Grc38_ENST00000574861|snRNA	9	8	21	0	1	1	2	5	12	0	0	0
Grc38_ENST00000577254|miRNA	0	0	0	3	2	2	0	1	1	2	3	4
Grc38_ENST00000577313|miRNA	0	1	0	1	1	0	0	2	2	2	3	2
Grc38_ENST00000577323|miRNA	4	7	6	13	10	13	2	7	10	1	8	1
Grc38_ENST00000577381|miRNA	52	64	83	0	0	0	0	0	73	0	0	2
Grc38_ENST00000577388|miRNA	2	2	1	167	73	110	0	1	5	60	42	87
Grc38_ENST00000577413|miRNA	0	0	0	0	7	3	0	0	1	0	0	0
Grc38_ENST00000577494|miRNA	11	16	26	0	0	0	0	0	26	0	0	0
Grc38_ENST00000577639|miRNA	0	1	0	6	1	5	0	1	1	0	1	0
Grc38_ENST00000577845|miRNA	12	25	23	0	0	0	0	0	24	0	0	0
Grc38_ENST00000577864|miRNA	9	9	5	1	0	2	2	0	1	0	1	0
Grc38_ENST00000577877|miRNA	3	3	0	5	8	3	3	1	2	2	5	7
Grc38_ENST00000577887|snoRNA	29	19	27	0	1	0	32	35	41	0	0	0
Grc38_ENST00000577895|miRNA	10	7	0	0	1	0	1	0	3	0	0	0
Grc38_ENST00000577912|miRNA	7	4	2	0	0	0	0	0	0	0	0	0
Grc38_ENST00000577937|miRNA	6	4	3	0	0	0	2	2	5	0	0	1
Grc38_ENST00000577955|miRNA	10	13	6	1	0	0	1	0	7	0	0	1
Grc38_ENST00000577988|snoRNA	175	163	137	13	13	5	75	99	193	7	3	6
Grc38_ENST00000578012|miRNA	1	0	2	5	5	5	1	0	0	0	0	4
Grc38_ENST00000578032|miRNA	0	0	0	1	0	5	0	0	0	1	3	1
Grc38_ENST00000578083|miRNA	8	7	1	0	0	1	1	2	3	0	0	1
Grc38_ENST00000578179|snoRNA	2	2	8	0	0	0	2	3	10	0	0	0
Grc38_ENST00000578183|snoRNA	17	22	12	1	1	0	4	6	17	2	0	1
Grc38_ENST00000578212|miRNA	31	31	12	1	1	0	8	0	12	1	1	0
Grc38_ENST00000578242|miRNA	104	179	165	68	33	45	140	193	50	19	27	11
Grc38_ENST00000578271|miRNA	8	1	1	1	1	0	1	1	2	0	1	0
Grc38_ENST00000578311|miRNA	9	17	10	4	4	10	17	9	24	0	2	0
Grc38_ENST00000578365|miRNA	0	0	0	1	0	0	0	0	0	16	3	9
Grc38_ENST00000578394|miRNA	0	0	0	0	0	0	0	0	0	8	0	7
Grc38_ENST00000578418|miRNA	2	0	0	4	3	6	0	0	2	23	0	8
Grc38_ENST00000578452|miRNA	481	204	130	1	9	0	57	9	99	4	1	9
Grc38_ENST00000578628|miRNA	0	0	2	4	3	4	1	1	1	2	5	1
Grc38_ENST00000578669|miRNA	1	1	2	2	0	0	0	6	1	0	0	2
Grc38_ENST00000578728|miRNA	2	2	1	0	0	0	0	0	29	0	0	0
Grc38_ENST00000578762|miRNA	1	1	2	1	0	1	0	1	2	3	3	0
Grc38_ENST00000578924|miRNA	19	54	22	79	61	79	36	43	18	33	94	22
Grc38_ENST00000579017|miRNA	110	75	39	3	1	0	15	2	70	1	0	0
Grc38_ENST00000579046|miRNA	18	25	16	2	0	0	0	1	16	0	0	0
Grc38_ENST00000579051|miRNA	0	0	0	0	0	0	0	0	1	14	0	13
Grc38_ENST00000579148|miRNA	2	4	0	0	0	0	3	3	0	0	0	0
Grc38_ENST00000579227|miRNA	6	11	87	0	0	0	0	0	89	0	0	0
Grc38_ENST00000579240|miRNA	1	5	2	4	4	8	0	2	2	2	3	1
Grc38_ENST00000579259|miRNA	4	10	6	0	1	0	1	1	7	1	0	0
Grc38_ENST00000579264|miRNA	2	4	2	8	10	12	3	8	1	5	9	4
Grc38_ENST00000579300|miRNA	1	0	10	0	0	0	0	0	2	0	0	0
Grc38_ENST00000579427|miRNA	1	0	0	1	2	6	0	0	4	0	2	0
Grc38_ENST00000579518|miRNA	9	6	4	4	2	3	5	11	2	0	0	0
Grc38_ENST00000579524|miRNA	5	3	7	2	2	1	0	2	3	2	2	0
Grc38_ENST00000579548|miRNA	6	1	0	1	0	0	0	1	0	0	0	2
Grc38_ENST00000579607|miRNA	0	1	0	4	4	3	0	1	3	1	12	3
Grc38_ENST00000579622|miRNA	51	37	16	0	1	0	1	0	16	0	1	0
Grc38_ENST00000579736|miRNA	2	6	1	7	7	5	1	4	0	3	5	3
Grc38_ENST00000579798|miRNA	13	24	25	1	1	0	6	5	2	5	2	8
Grc38_ENST00000579844|miRNA	10	7	9	2	2	0	19	26	29	3	1	1
Grc38_ENST00000579867|miRNA	2	5	4	2	4	3	3	1	1	1	3	1
Grc38_ENST00000579879|snoRNA	269	370	338	9	17	13	242	305	219	9	17	15
Grc38_ENST00000579890|miRNA	18	16	34	0	0	0	0	0	18	0	0	0
Grc38_ENST00000579931|miRNA	0	3	3	6	1	2	1	0	2	1	1	2
Grc38_ENST00000579969|snoRNA	9	10	6	0	1	0	9	12	15	0	2	0
Grc38_ENST00000580154|miRNA	3	4	2	1	0	0	0	0	4	0	0	0
Grc38_ENST00000580185|miRNA	1	1	2	0	0	0	1	1	0	4	0	0
Grc38_ENST00000580233|miRNA	204	238	197	950	714	1110	163	366	604	323	1007	413
Grc38_ENST00000580268|miRNA	2	6	4	0	0	0	1	1	2	0	0	0
Grc38_ENST00000580305|miRNA	0	2	4	2	1	0	2	7	1	2	1	1
Grc38_ENST00000580344|miRNA	8	6	11	126	77	67	1	11	10	186	109	209
Grc38_ENST00000580516|miRNA	3	3	0	0	3	0	0	0	0	0	2	0
Grc38_ENST00000580533|snoRNA	99	107	91	10	6	12	73	97	131	6	7	1
Grc38_ENST00000580563|miRNA	0	10	1	0	0	0	0	0	1	0	0	0
Grc38_ENST00000580600|miRNA	15	19	4	1	1	2	0	3	8	0	0	1
Grc38_ENST00000580609|miRNA	0	1	0	12	1	2	0	0	0	0	3	1
Grc38_ENST00000580651|miRNA	0	11	6	0	0	0	8	6	7	0	0	0
Grc38_ENST00000580653|miRNA	5	3	1	0	0	0	0	0	1	0	0	0
Grc38_ENST00000580664|miRNA	240	196	93	0	0	0	2	4	80	1	0	1
Grc38_ENST00000580703|miRNA	1	0	3	1	0	1	0	2	2	0	2	1
Grc38_ENST00000580730|miRNA	1	3	2	0	0	0	2	2	0	0	0	0
Grc38_ENST00000580761|miRNA	1	9	2	30	14	17	1	4	6	3	24	9
Grc38_ENST00000580767|miRNA	0	0	0	5	1	1	0	2	2	0	3	0
Grc38_ENST00000580848|miRNA	0	2	1	1	6	3	1	0	2	1	0	5
Grc38_ENST00000580862|miRNA	2	3	0	20	13	13	4	6	6	3	21	1
Grc38_ENST00000580935|miRNA	2	4	8	6	1	2	4	0	6	0	1	2
Grc38_ENST00000580972|snRNA	13	49	29	0	1	1	21	25	37	1	1	0
Grc38_ENST00000581095|miRNA	3	0	5	3	0	0	4	5	1	1	1	0
Grc38_ENST00000581102|miRNA	1	4	1	0	1	0	3	1	1	0	1	0
Grc38_ENST00000581119|miRNA	0	3	4	1	1	0	1	3	3	0	0	0
Grc38_ENST00000581149|miRNA	48	28	27	7	0	2	1	0	52	1	2	1
Grc38_ENST00000581217|miRNA	88	82	32	1	3	2	18	3	33	2	3	7
Grc38_ENST00000581316|miRNA	0	1	1	20	9	15	1	1	0	25	8	31
Grc38_ENST00000581340|miRNA	9	9	3	0	0	0	1	0	3	0	0	0
Grc38_ENST00000581364|miRNA	3	3	4	133	80	77	0	1	5	210	52	138
Grc38_ENST00000581525|snoRNA	142	224	178	3	5	5	149	202	168	5	3	1
Grc38_ENST00000581535|miRNA	0	1	1	0	3	2	2	0	1	1	3	2
Grc38_ENST00000581650|miRNA	31	15	8	0	1	3	0	1	11	2	0	2
Grc38_ENST00000581704|miRNA	5	5	2	0	0	0	1	0	4	1	0	0
Grc38_ENST00000581730|miRNA	1	0	1	0	3	2	0	0	1	2	1	0
Grc38_ENST00000581789|miRNA	4	2	0	0	0	0	1	1	2	2	0	0
Grc38_ENST00000581837|miRNA	0	2	1	0	3	1	0	0	1	0	2	0
Grc38_ENST00000581881|miRNA	1	4	1	0	0	2	1	2	3	0	0	0
Grc38_ENST00000581890|miRNA	25	15	9	1	2	0	3	1	7	0	0	1
Grc38_ENST00000581907|miRNA	2	0	1	2	2	1	1	1	5	1	1	0
Grc38_ENST00000581999|miRNA	48	42	37	21	5	16	32	29	21	6	4	6
Grc38_ENST00000582000|miRNA	1	2	2	3	3	2	0	0	0	0	3	2
Grc38_ENST00000582069|miRNA	4	5	5	0	0	0	0	0	1	0	1	2
Grc38_ENST00000582082|miRNA	0	4	3	13	7	14	3	3	1	39	28	37
Grc38_ENST00000582090|miRNA	12	26	35	133	130	84	12	24	40	32	89	42
Grc38_ENST00000582102|miRNA	0	1	2	8	1	0	0	2	1	1	1	0
Grc38_ENST00000582159|miRNA	7	4	4	0	1	0	0	0	5	0	1	0
Grc38_ENST00000582203|miRNA	14	21	20	5	1	1	10	20	7	2	2	4
Grc38_ENST00000582216|miRNA	0	0	0	10	9	13	1	0	2	44	5	31
Grc38_ENST00000582284|miRNA	6	12	9	0	0	0	0	0	10	0	0	0
Grc38_ENST00000582362|miRNA	2	7	3	6	12	7	2	2	4	3	8	5
Grc38_ENST00000582396|miRNA	5	4	0	0	0	1	0	1	1	0	0	1
Grc38_ENST00000582403|miRNA	4	5	0	0	0	0	0	0	0	1	0	0
Grc38_ENST00000582434|miRNA	34	41	2	0	0	0	1	0	4	0	0	0
Grc38_ENST00000582442|miRNA	0	3	3	0	2	1	1	4	3	0	6	1
Grc38_ENST00000582495|miRNA	0	0	0	1	4	3	1	0	0	1	0	0
Grc38_ENST00000582550|snoRNA	3	3	3	0	0	0	1	0	0	0	0	0
Grc38_ENST00000582628|miRNA	2	2	1	1	1	3	1	0	0	0	0	3
Grc38_ENST00000582639|miRNA	5	2	1	1	0	3	1	1	0	0	0	0
Grc38_ENST00000582661|miRNA	16	28	25	0	5	4	9	21	18	0	0	0
Grc38_ENST00000582720|miRNA	1	6	1	0	0	0	2	0	0	0	0	0
Grc38_ENST00000582739|miRNA	0	0	6	0	0	0	0	0	6	0	0	0
Grc38_ENST00000582777|miRNA	0	0	0	1	2	3	0	1	1	7	1	7
Grc38_ENST00000582803|miRNA	1	5	5	0	0	0	0	0	0	0	0	0
Grc38_ENST00000582816|miRNA	2	1	0	3	4	3	0	1	2	1	2	2
Grc38_ENST00000582846|miRNA	2	1	2	0	0	0	1	6	1	0	0	0
Grc38_ENST00000582890|miRNA	44	84	64	6	5	1	60	114	35	5	10	7
Grc38_ENST00000582922|miRNA	20	13	10	0	1	0	0	1	10	0	0	0
Grc38_ENST00000583032|snoRNA	190	313	258	1	1	2	216	287	146	0	2	1
Grc38_ENST00000583098|miRNA	32	31	0	0	0	0	0	0	1	6	0	2
Grc38_ENST00000583110|miRNA	189	183	51	0	0	0	0	0	43	0	0	0
Grc38_ENST00000583157|miRNA	1	4	1	0	0	0	4	9	2	0	0	0
Grc38_ENST00000583272|miRNA	11	9	3	0	0	0	0	0	6	0	0	0
Grc38_ENST00000583311|miRNA	0	2	0	1	3	2	0	0	1	0	2	2
Grc38_ENST00000583357|miRNA	1	0	0	17	16	25	0	1	1	160	13	128
Grc38_ENST00000583386|miRNA	0	3	3	1	1	0	2	2	0	0	0	0
Grc38_ENST00000583429|miRNA	10	9	6	6	2	2	18	7	7	1	5	1
Grc38_ENST00000583431|miRNA	1	3	1	0	1	2	1	1	2	0	0	1
Grc38_ENST00000583472|miRNA	46	64	4	0	0	0	0	1	1	0	0	0
Grc38_ENST00000583573|miRNA	6	7	6	2	1	1	2	0	2	0	1	0
Grc38_ENST00000583596|miRNA	0	3	6	2	1	0	3	5	1	0	0	0
Grc38_ENST00000583619|snoRNA	122	194	186	3	2	0	187	149	163	0	0	1
Grc38_ENST00000583730|miRNA	17	29	10	0	0	3	10	13	31	1	3	4
Grc38_ENST00000583779|miRNA	1	0	0	2	1	2	2	0	1	2	1	1
Grc38_ENST00000583823|snoRNA	8	7	15	0	0	0	10	8	12	0	0	0
Grc38_ENST00000583845|miRNA	1	4	4	8	8	5	5	0	5	1	8	3
Grc38_ENST00000583861|snoRNA	127	177	139	4	6	3	172	194	148	3	2	3
Grc38_ENST00000583893|miRNA	3	6	1	0	5	3	0	0	2	0	8	0
Grc38_ENST00000583964|miRNA	3	11	0	0	0	0	0	0	2	0	0	0
Grc38_ENST00000584034|miRNA	4	3	15	0	0	0	19	6	16	0	0	0
Grc38_ENST00000584045|miRNA	123	74	37	3	1	1	0	0	28	1	0	0
Grc38_ENST00000584072|miRNA	2	3	0	47	39	21	0	0	3	79	28	109
Grc38_ENST00000584085|miRNA	1	0	0	1	4	2	0	1	1	1	4	5
Grc38_ENST00000584092|miRNA	1	0	1	3	3	2	1	2	1	0	5	0
Grc38_ENST00000584133|miRNA	2	2	35	0	0	0	0	0	14	1	0	1
Grc38_ENST00000584136|miRNA	0	1	1	5	4	2	1	1	2	1	2	2
Grc38_ENST00000584172|miRNA	13	8	4	0	0	1	0	1	6	0	0	0
Grc38_ENST00000584173|miRNA	1	10	4	4	9	7	2	9	3	0	5	1
Grc38_ENST00000584178|miRNA	6	3	2	93	92	72	0	0	6	331	92	352
Grc38_ENST00000584185|miRNA	1	1	0	5	8	7	0	0	2	24	12	20
Grc38_ENST00000584200|miRNA	0	0	1	2	2	4	1	1	3	1	2	3
Grc38_ENST00000584213|snoRNA	14	16	10	2	0	1	4	3	7	0	0	1
Grc38_ENST00000584249|miRNA	5	2	4	0	0	0	8	4	1	0	0	0
Grc38_ENST00000584254|miRNA	1	1	2	1	2	3	0	2	2	1	2	1
Grc38_ENST00000584275|snoRNA	25	44	30	0	2	0	32	36	38	0	0	0
Grc38_ENST00000584302|snoRNA	9	21	16	0	0	0	9	19	7	0	0	0
Grc38_ENST00000584345|miRNA	2	0	4	13	7	22	1	0	7	10	8	9
Grc38_ENST00000584360|miRNA	0	1	0	2	11	7	0	0	0	2	8	3
Grc38_ENST00000584443|miRNA	2	0	2	50	53	37	1	2	6	52	78	22
Grc38_ENST00000584545|miRNA	1	5	2	0	0	0	1	0	4	0	0	0
Grc38_ENST00000584571|miRNA	0	3	1	1	3	1	2	1	0	1	0	0
Grc38_ENST00000584572|miRNA	0	4	1	2	2	0	2	4	1	0	2	0
Grc38_ENST00000584629|miRNA	6	5	2	0	0	0	0	0	2	0	0	0
Grc38_ENST00000584664|miRNA	2	3	0	3	8	3	1	0	2	15	6	7
Grc38_ENST00000584820|miRNA	42	79	7	0	0	0	0	0	5	0	0	0
Grc38_ENST00000584839|miRNA	1	3	1	3	1	0	1	0	0	0	2	1
Grc38_ENST00000584882|miRNA	7	7	4	0	2	5	5	5	2	0	0	0
Grc38_ENST00000584899|miRNA	10	15	34	0	0	0	1	0	18	0	0	0
Grc38_ENST00000584923|snoRNA	175	159	132	8	5	4	90	129	196	1	3	3
Grc38_ENST00000584930|miRNA	5	6	4	0	0	0	0	4	6	1	0	2
Grc38_ENST00000584949|snoRNA	94	174	108	0	1	1	99	106	102	1	1	0
Grc38_ENST00000585011|snoRNA	4	10	15	1	0	0	7	7	15	0	0	0
Grc38_ENST00000585078|snoRNA	8	6	7	0	0	0	16	8	19	0	1	1
Grc38_ENST00000585112|miRNA	1	4	1	4	4	6	0	0	1	1	4	3
Grc38_ENST00000585165|miRNA	61	40	24	0	0	0	0	5	11	0	0	0
Grc38_ENST00000585238|miRNA	2	2	0	4	1	0	0	1	0	0	0	1
Grc38_ENST00000586026|miRNA	13	11	11	2	0	1	8	3	8	1	0	2
Grc38_ENST00000591554|miRNA	185	94	93	19	7	13	84	88	64	1	3	2
Grc38_ENST00000605806|snRNA	274	624	443	72	68	71	322	456	451	724	205	1490
Grc38_ENST00000606121|miRNA	3	0	2	4	1	11	6	9	6	6	2	0
Grc38_ENST00000606190|snRNA	41	152	153	12	13	7	40	87	251	2	15	18
Grc38_ENST00000606207|miRNA	40	45	41	92	50	54	54	47	23	16	36	2
Grc38_ENST00000606349|miRNA	6	15	13	0	0	0	15	20	1	0	0	0
Grc38_ENST00000606412|snoRNA	33	55	34	0	0	0	50	31	24	1	0	1
Grc38_ENST00000606420|snoRNA	0	6	7	0	0	1	0	4	3	0	0	0
Grc38_ENST00000606526|snoRNA	11	26	22	9	1	1	7	20	31	0	0	0
Grc38_ENST00000606534|snRNA	1	4	4	0	0	0	0	0	4	0	0	0
Grc38_ENST00000606574|snRNA	0	4	1	1	1	2	2	1	5	0	0	0
Grc38_ENST00000606577|snoRNA	36	81	89	0	0	0	42	70	39	0	2	2
Grc38_ENST00000606623|snRNA	35	71	95	2	2	8	31	39	113	3	0	2
Grc38_ENST00000606724|miRNA	91	95	96	55	37	31	206	171	133	7	16	5
Grc38_ENST00000606769|snoRNA	26	41	59	0	1	1	33	43	71	0	0	0
Grc38_ENST00000606801|snRNA	7	2	23	0	0	0	0	0	15	44	0	55
Grc38_ENST00000606807|miRNA	0	0	0	4	1	1	0	2	0	1	1	5
Grc38_ENST00000606837|miRNA	0	4	0	29	7	14	2	0	0	6	6	2
Grc38_ENST00000607261|snoRNA	5	4	6	0	0	0	8	1	7	2	0	0
Grc38_ENST00000607313|snoRNA	138	203	174	1	0	0	153	159	86	2	1	0
Grc38_ENST00000607334|miRNA	4	10	4	0	1	2	8	8	18	0	1	0
Grc38_ENST00000607417|snoRNA	2	1	3	0	0	0	2	0	5	0	0	0
Grc38_ENST00000607441|miRNA	7	11	12	0	0	0	15	8	8	0	0	0
Grc38_ENST00000607575|miRNA	174	268	163	163	87	92	142	224	109	39	61	34
Grc38_ENST00000607707|snoRNA	22	18	13	0	0	0	32	19	28	0	0	0
Grc38_ENST00000607728|snRNA	1	7	12	0	0	0	0	5	13	0	0	0
Grc38_ENST00000607869|miRNA	2	5	3	0	0	0	0	1	2	3	0	0
Grc38_ENST00000608459|snoRNA	5	10	6	0	0	0	2	5	4	0	0	0
Grc38_ENST00000609620|snoRNA	8	14	6	1	1	0	15	10	13	1	4	2
Grc38_ENST00000610307|miRNA	19	11	0	0	0	0	0	0	0	0	0	0
Grc38_ENST00000610382|miRNA	0	2	0	1	1	0	0	1	1	1	3	0
Grc38_ENST00000610425|miRNA	3	6	3	0	0	0	0	0	3	0	0	0
Grc38_ENST00000610512|miRNA	0	1	0	0	7	0	0	0	0	0	7	2
Grc38_ENST00000610524|miRNA	134	226	109	2876	3647	2663	123	194	159	1006	2342	1122
Grc38_ENST00000610544|miRNA	7	20	13	6	8	13	3	8	20	7	6	7
Grc38_ENST00000610686|miRNA	2	0	1	2	3	1	0	1	1	1	1	2
Grc38_ENST00000610697|miRNA	0	0	1	0	1	3	0	1	0	0	3	2
Grc38_ENST00000610762|miRNA	11	21	26	0	0	0	0	1	23	0	0	0
Grc38_ENST00000610848|miRNA	2	1	2	0	2	2	2	3	2	1	5	1
Grc38_ENST00000611043|miRNA	4	3	3	0	0	0	0	1	1	0	0	1
Grc38_ENST00000611066|miRNA	29	35	18	132	119	123	20	33	47	583	145	441
Grc38_ENST00000611300|sRNA	0	1	1	15	8	15	2	2	2	6	10	11
Grc38_ENST00000611310|miRNA	1	4	3	5	1	4	1	2	5	2	3	0
Grc38_ENST00000611454|snRNA	6	17	22	3	1	1	3	14	44	0	1	0
Grc38_ENST00000611613|miRNA	0	6	0	0	0	0	0	0	1	1	2	1
Grc38_ENST00000611652|miRNA	0	1	0	0	0	3	1	3	1	0	1	0
Grc38_ENST00000611955|miRNA	0	1	0	0	2	2	1	2	0	1	2	1
Grc38_ENST00000611970|miRNA	1	2	0	1	0	1	1	4	2	0	0	0
Grc38_ENST00000612070|miRNA	14	12	0	0	0	0	0	0	2	0	0	1
Grc38_ENST00000612171|miRNA	6	4	3	442	116	230	14	9	1	113	86	90
Grc38_ENST00000612268|miRNA	554	1298	1544	806	571	428	621	1003	2291	392	651	604
Grc38_ENST00000612638|miRNA	0	2	4	16	7	5	0	3	2	18	15	37
Grc38_ENST00000612697|miRNA	5	6	14	0	0	0	1	0	19	0	0	1
Grc38_ENST00000612766|miRNA	10	33	17	142	80	86	9	23	51	30	141	21
Grc38_ENST00000612767|miRNA	1	3	3	1	1	0	0	0	3	0	1	1
Grc38_ENST00000612936|miRNA	1	1	1	2	0	2	0	2	0	1	0	0
Grc38_ENST00000613023|snRNA	33	68	70	64	57	58	39	69	62	936	176	1750
Grc38_ENST00000613189|miRNA	1	2	0	0	6	3	1	2	5	4	12	2
Grc38_ENST00000613364|miRNA	0	0	1	1	2	0	0	2	2	1	10	1
Grc38_ENST00000613527|miRNA	179	314	290	29	7	14	280	240	167	14	10	15
Grc38_ENST00000613558|miRNA	2	1	0	79	23	43	0	0	0	14	20	7
Grc38_ENST00000613561|miRNA	1	2	1	4	3	2	0	2	2	3	8	3
Grc38_ENST00000613747|miRNA	5	2	4	5	1	0	3	5	2	1	5	4
Grc38_ENST00000613956|snRNA	244	887	754	53	40	52	297	526	1460	21	84	36
Grc38_ENST00000614031|miRNA	183	157	63	0	0	0	0	0	45	0	0	0
Grc38_ENST00000614083|snRNA	7	41	31	0	3	1	8	19	56	1	0	1
Grc38_ENST00000614084|miRNA	1	1	1	1	0	0	0	0	0	17	0	12
Grc38_ENST00000614175|miRNA	0	2	2	0	0	0	3	2	3	0	0	0
Grc38_ENST00000614371|miRNA	0	1	5	0	0	0	0	0	5	0	0	0
Grc38_ENST00000614515|miRNA	0	0	3	0	0	2	1	1	4	0	0	0
Grc38_ENST00000614758|miRNA	0	1	0	3	2	3	0	0	0	3	1	0
Grc38_ENST00000614761|miRNA	2	0	0	0	0	3	0	1	1	2	1	1
Grc38_ENST00000614764|miRNA	3	4	0	5	3	4	0	3	2	1	8	2
Grc38_ENST00000614774|snRNA	345	781	600	108	145	133	412	546	700	1504	391	3070
Grc38_ENST00000614814|miRNA	2	2	2	1	2	0	1	0	2	1	2	3
Grc38_ENST00000614958|miRNA	4	1	2	0	0	1	1	1	0	0	0	0
Grc38_ENST00000615026|miRNA	6	5	1	0	0	0	2	0	5	1	0	0
Grc38_ENST00000615236|miRNA	1	1	1	3	2	7	4	2	2	0	3	0
Grc38_ENST00000615338|miRNA	2	1	11	0	0	1	0	0	5	0	0	0
Grc38_ENST00000615348|miRNA	0	0	2	1	3	0	0	3	0	0	0	1
Grc38_ENST00000615351|miRNA	7	13	7	0	0	0	0	5	4	0	0	0
Grc38_ENST00000615356|snRNA	14	68	75	0	1	1	27	51	97	0	1	0
Grc38_ENST00000615428|miRNA	1	2	3	0	3	0	1	0	9	1	2	0
Grc38_ENST00000615499|miRNA	4	8	6	0	0	0	0	0	4	0	0	0
Grc38_ENST00000615649|miRNA	2	1	0	2	1	1	1	4	4	1	1	1
Grc38_ENST00000615913|miRNA	0	0	1	4	0	0	1	2	2	0	0	1
Grc38_ENST00000615943|snRNA	1	4	2	0	0	0	0	3	5	0	0	0
Grc38_ENST00000616044|miRNA	13	6	4	4	7	5	0	2	7	1	4	4
Grc38_ENST00000616087|miRNA	3	4	1	0	0	0	0	0	3	0	0	0
Grc38_ENST00000616090|miRNA	1	1	6	1	0	0	7	1	2	0	0	0
Grc38_ENST00000616574|miRNA	5	4	3	3	0	0	7	5	4	0	0	0
Grc38_ENST00000616937|miRNA	2	6	1	8	6	9	1	0	6	2	10	0
Grc38_ENST00000616984|sRNA	0	2	0	12	10	8	0	0	2	4	20	4
Grc38_ENST00000617048|miRNA	0	0	0	1	1	3	0	0	1	0	7	2
Grc38_ENST00000617174|miRNA	4	6	0	0	0	0	1	3	0	0	2	0
Grc38_ENST00000617236|miRNA	10145	10320	4368	4185	3077	3229	3796	10653	6813	1193	3786	1160
Grc38_ENST00000617238|miRNA	44	65	88	428	276	587	71	82	75	152	585	165
Grc38_ENST00000617320|miRNA	47	70	57	5	4	7	89	89	41	1	5	0
Grc38_ENST00000617525|miRNA	12	22	10	1	6	4	2	2	15	2	6	7
Grc38_ENST00000617611|miRNA	2	11	2	0	0	0	1	3	6	3	1	4
Grc38_ENST00000617646|miRNA	3	1	0	0	2	0	1	1	1	1	1	0
Grc38_ENST00000617733|miRNA	0	0	1	0	0	0	0	0	0	15	0	25
Grc38_ENST00000617852|miRNA	10	15	16	0	0	0	0	0	27	0	0	0
Grc38_ENST00000617883|miRNA	24	31	36	838	709	692	17	23	26	1011	772	1361
Grc38_ENST00000618203|miRNA	1	3	1	1	0	0	2	3	0	0	0	0
Grc38_ENST00000618408|miRNA	0	1	0	5	1	3	0	2	2	1	6	1
Grc38_ENST00000618580|miRNA	0	9	1	0	0	1	3	0	0	0	0	0
Grc38_ENST00000618647|miRNA	7	6	115	0	1	0	0	0	95	0	0	0
Grc38_ENST00000618703|miRNA	1	2	10	0	0	0	0	1	4	0	0	0
Grc38_ENST00000618716|miRNA	21	17	10	2	0	2	3	0	11	2	5	1
Grc38_ENST00000618745|miRNA	1	4	1	0	0	0	1	3	2	0	0	1
Grc38_ENST00000618823|miRNA	0	3	3	1	3	1	1	0	3	1	7	0
Grc38_ENST00000618978|snRNA	45	100	161	2	3	3	38	70	210	1	4	1
Grc38_ENST00000619029|miRNA	1	6	2	0	0	0	1	3	3	1	0	0
Grc38_ENST00000619109|snRNA	343	770	646	322	481	434	397	572	734	1740	1490	3350
Grc38_ENST00000619178|snoRNA	79	78	75	4	3	6	51	62	107	1	3	3
Grc38_ENST00000619197|snRNA	0	3	5	0	0	0	1	4	7	0	0	1
Grc38_ENST00000619225|snRNA	703	1529	1560	55	61	52	766	1303	2117	24	79	30
Grc38_ENST00000619524|snRNA	67	166	158	20	32	26	60	126	210	61	56	93
Grc38_ENST00000619545|miRNA	0	0	3	2	3	0	1	1	1	0	4	1
Grc38_ENST00000619551|miRNA	3	3	2	2	2	1	0	0	0	0	1	0
Grc38_ENST00000619634|miRNA	2	2	2	0	2	1	0	2	1	1	4	0
Grc38_ENST00000619973|miRNA	5	3	8	18	18	15	3	2	9	12	10	9
Grc38_ENST00000620206|miRNA	0	1	0	2	1	3	1	0	1	3	1	0
Grc38_ENST00000620232|snoRNA	88	132	118	6	2	1	76	114	175	3	6	2
Grc38_ENST00000620268|snRNA	258	905	738	50	46	43	295	487	1370	14	66	40
Grc38_ENST00000620446|snoRNA	71	118	115	7	5	5	86	104	140	5	6	3
Grc38_ENST00000620527|miRNA	1	3	0	3	2	1	1	0	1	0	3	1
Grc38_ENST00000620577|miRNA	13	22	28	0	0	0	1	1	20	0	0	0
Grc38_ENST00000620626|snRNA	0	4	1	2	2	0	0	0	3	1	7	0
Grc38_ENST00000620677|miRNA	1	7	1	0	0	0	1	0	1	0	0	0
Grc38_ENST00000620823|miRNA	0	0	0	0	0	0	0	0	0	8	0	6
Grc38_ENST00000620883|miRNA	2	3	3	0	0	0	0	0	3	0	0	0
Grc38_ENST00000621224|miRNA	3	6	6	5	1	1	0	0	3	0	2	1
Grc38_ENST00000621373|miRNA	4	1	4	2	5	6	1	1	2	3	10	2
Grc38_ENST00000621409|snRNA	2	3	0	0	0	0	0	1	4	0	0	0
Grc38_ENST00000621427|miRNA	98	142	86	611	679	522	106	140	266	1592	673	1233
Grc38_ENST00000621451|miRNA	2	4	1	2	2	2	4	4	3	0	1	1
Grc38_ENST00000621466|miRNA	2969	2360	2085	824	207	392	5083	2811	3135	103	280	135
Grc38_ENST00000621498|miRNA	3	4	5	0	0	0	0	0	1	0	1	0
Grc38_ENST00000621541|miRNA	2	2	0	0	0	0	0	0	39	0	0	0
Grc38_ENST00000621656|miRNA	7	5	2	0	3	10	0	6	1	0	3	4
Grc38_ENST00000621667|miRNA	22	40	34	4	3	3	38	35	17	2	1	5
Grc38_ENST00000621753|snRNA	1	29	30	0	0	0	3	10	42	0	0	0
Grc38_ENST00000621916|miRNA	30	36	30	0	0	0	0	0	31	0	0	0
Grc38_ENST00000621981|miRNA	5	19	12	130	63	71	8	27	31	23	126	21
Grc38_ENST00000622285|snRNA	31	86	80	4	13	8	37	55	100	13	33	34
Grc38_ENST00000622286|snRNA	3	13	40	1	0	0	6	22	34	0	0	1
Grc38_ENST00000622426|miRNA	1	0	0	1	5	2	1	1	0	0	3	3
Grc38_ENST00000622482|miRNA	1	2	1	1	3	4	0	1	2	1	0	2
Grc38_ENST00000622485|miRNA	4	1	1	0	2	0	3	3	0	1	1	0
Grc38_ENST00000622631|snoRNA	7	13	11	5	2	0	4	7	3	2	3	0
Grc38_ENST00000622687|miRNA	0	2	0	2	1	1	0	2	1	0	6	0
Grc38_ENST00000622725|miRNA	1	6	3	3	7	5	3	1	2	1	8	2
Grc38_ENST00000622793|miRNA	3	7	4	0	7	1	2	7	4	0	6	3
Grc38_ENST00000622846|miRNA	2	1	0	1	0	1	0	0	2	2	3	2
Grc38_ENST00000622893|miRNA	1	3	4	0	0	0	1	5	6	3	1	1
Grc38_ENST00000624938|miRNA	2165	3126	2316	1115	1221	1362	1391	2870	2079	302	1163	404
Grc38_ENST00000625269|snoRNA	0	0	2	15	1	1	0	0	0	1	1	0
Grc38_ENST00000625314|snoRNA	12	8	14	0	0	0	12	8	20	0	1	0
Grc38_ENST00000625347|miRNA	717	1708	2137	1775	1629	1227	865	1428	2675	662	1545	908
Grc38_ENST00000625466|miRNA	7	7	4	3	1	7	4	13	12	0	5	6
Grc38_ENST00000625525|miRNA	12	11	2	0	0	0	0	0	4	1	0	2
Grc38_ENST00000625542|miRNA	6	14	13	12	7	9	10	9	8	3	4	2
Grc38_ENST00000625572|miRNA	3	3	1	0	0	2	0	3	2	0	0	0
Grc38_ENST00000625614|miRNA	9	36	46	48	96	87	30	12	35	27	79	26
Grc38_ENST00000625652|miRNA	2	3	4	0	0	0	0	1	1	0	0	0
Grc38_ENST00000625656|miRNA	33	47	47	3400	2696	4093	23	29	62	2266	3957	2595
Grc38_ENST00000625805|miRNA	14	39	23	5	10	7	11	39	23	5	7	2
Grc38_ENST00000625845|snoRNA	96	112	116	3	5	5	62	92	131	4	6	4
Grc38_ENST00000625861|miRNA	2	4	0	0	0	0	1	0	1	0	2	0
Grc38_ENST00000625876|snoRNA	82	151	114	8	5	6	74	129	175	2	3	4
Grc38_ENST00000625900|miRNA	0	3	4	1	7	2	0	3	4	3	4	3
Grc38_ENST00000625943|snoRNA	165	249	244	3	12	3	192	211	218	0	7	1
Grc38_ENST00000625967|miRNA	6419	12339	11705	3932	4333	3851	7847	9849	15326	1459	4978	1975
Grc38_ENST00000626018|miRNA	22	50	58	211	232	219	36	27	37	107	242	122
Grc38_ENST00000626070|miRNA	4	4	0	0	0	0	0	0	2	0	0	0
Grc38_ENST00000626086|miRNA	3	5	3	0	0	1	0	4	1	1	0	1
Grc38_ENST00000626159|miRNA	1028	1629	876	485	672	624	595	1360	996	161	498	151
Grc38_ENST00000626187|miRNA	7	11	6	0	0	0	3	6	12	0	0	0
Grc38_ENST00000626231|miRNA	10	10	6	0	0	0	0	0	1	0	1	0
Grc38_ENST00000626279|miRNA	38	37	47	3350	2564	3919	19	25	66	2349	4004	2585
Grc38_ENST00000626324|miRNA	0	2	0	0	1	2	0	0	6	2	5	2
Grc38_ENST00000626443|miRNA	13	21	29	79	64	76	12	15	35	56	67	60
Grc38_ENST00000626470|miRNA	3	3	3	4	0	4	1	3	5	2	2	2
Grc38_ENST00000626616|miRNA	2	4	1	0	1	0	0	2	5	2	2	0
Grc38_ENST00000626694|miRNA	2	6	3	5	4	9	4	3	5	1	6	3
Grc38_ENST00000626708|miRNA	0	7	1	0	0	0	0	0	4	0	0	0
Grc38_ENST00000626759|miRNA	144	104	35	0	0	0	0	0	22	0	0	0
Grc38_ENST00000626830|miRNA	66	107	147	0	0	0	41	99	48	1	0	2
Grc38_ENST00000626835|miRNA	9	15	17	1	3	2	12	15	18	3	6	0
Grc38_ENST00000626841|miRNA	748	762	664	5652	6809	6326	744	975	1334	2310	7898	2439
Grc38_ENST00000626886|snoRNA	15	41	46	0	0	0	26	47	33	0	0	0
Grc38_ENST00000626896|miRNA	36	40	45	3359	2711	3946	31	21	59	2438	4003	2508
Grc38_ENST00000626913|miRNA	11	7	3	0	0	0	0	0	3	0	1	0
Grc38_ENST00000626927|miRNA	0	3	1	0	0	0	0	4	6	0	0	0
Grc38_ENST00000626963|snoRNA	78	121	84	1	3	0	69	120	53	1	3	6
Grc38_ENST00000626980|miRNA	1	0	2	3	3	1	1	1	0	0	2	2
Grc38_ENST00000627064|miRNA	3	1	2	3	3	5	0	1	2	1	3	3
Grc38_ENST00000627119|miRNA	0	0	1	0	2	1	2	1	2	1	0	2
Grc38_ENST00000627128|miRNA	34	71	92	0	0	0	0	2	64	0	0	0
Grc38_ENST00000627175|miRNA	9	16	14	11	12	10	4	15	18	3	10	4
Grc38_ENST00000627253|snoRNA	2	4	2	0	0	1	1	4	3	0	1	0
Grc38_ENST00000627369|miRNA	3	5	3	0	0	0	0	0	7	0	0	3
Grc38_ENST00000627518|miRNA	5988	11360	10670	3789	4276	3901	7444	9177	13970	1439	4847	1892
Grc38_ENST00000627629|miRNA	0	4	9	0	0	0	0	0	28	0	0	0
Grc38_ENST00000627649|miRNA	2	4	5	0	1	0	3	0	6	0	1	0
Grc38_ENST00000627702|miRNA	5	2	3	4	7	5	2	3	4	1	6	1
Grc38_ENST00000627736|miRNA	20	33	47	58	87	121	16	33	30	78	121	60
Grc38_ENST00000627793|snRNA	2	0	6	0	0	0	3	4	3	0	0	0
Grc38_ENST00000627879|miRNA	2	1	1	0	2	8	1	3	3	3	4	3
Grc38_ENST00000627888|miRNA	13	32	20	6	7	4	31	41	32	1	15	2
Grc38_ENST00000627889|miRNA	29	46	43	3512	2669	3937	26	27	72	2309	3895	2543
Grc38_ENST00000627933|snoRNA	3	5	1	1	0	1	0	0	0	0	0	1
Grc38_ENST00000627943|miRNA	15	7	3	1	1	0	1	0	6	0	0	0
Grc38_ENST00000627978|miRNA	3	3	2	0	1	1	0	2	4	0	0	0
Grc38_ENST00000627983|snoRNA	44	59	63	0	0	0	23	32	48	0	2	1
Grc38_ENST00000628052|miRNA	5	7	5	24	28	28	2	2	18	16	27	8
Grc38_ENST00000628105|miRNA	1	8	8	5	0	0	4	10	3	4	1	1
Grc38_ENST00000628107|miRNA	0	1	0	6	6	6	0	0	1	11	12	5
Grc38_ENST00000628177|snoRNA	34	79	64	1	1	1	45	56	34	0	1	0
Grc38_ENST00000628373|miRNA	1	11	9	0	0	0	5	5	7	0	0	0
Grc38_ENST00000628381|miRNA	1	2	2	6	5	13	3	2	8	7	21	4
Grc38_ENST00000628458|snoRNA	26	70	69	0	1	0	20	43	75	0	0	1
Grc38_ENST00000628469|miRNA	19	18	19	9	12	7	5	15	32	1	11	1
Grc38_ENST00000628570|miRNA	0	2	4	0	0	0	0	0	1	0	4	0
Grc38_ENST00000628590|snoRNA	43	63	88	0	5	4	21	44	40	3	2	7
Grc38_ENST00000628647|miRNA	2	6	7	0	0	0	1	3	17	0	0	0
Grc38_ENST00000628653|miRNA	21	20	15	10	6	7	11	12	20	6	18	2
Grc38_ENST00000628661|miRNA	17	36	31	0	0	0	0	0	38	0	0	0
Grc38_ENST00000628672|miRNA	78	146	145	0	1	1	39	94	34	0	0	2
Grc38_ENST00000628701|miRNA	99	173	182	478	574	554	48	136	262	1162	707	1196
Grc38_ENST00000628724|miRNA	5	5	1	10	17	15	2	5	6	3	28	7
Grc38_ENST00000628777|miRNA	1	1	0	1	3	5	2	0	2	0	5	0
Grc38_ENST00000628893|miRNA	2	2	1	6	0	2	0	1	0	0	4	1
Grc38_ENST00000628908|miRNA	2926	5981	5049	618	852	729	4148	4718	6451	187	885	263
Grc38_ENST00000629015|miRNA	17	8	6	0	2	2	1	2	7	0	0	1
Grc38_ENST00000629038|snoRNA	15	32	17	0	1	0	43	33	20	0	0	0
Grc38_ENST00000629061|miRNA	2	3	1	1	0	0	1	0	1	1	0	0
Grc38_ENST00000629107|miRNA	35	78	144	0	0	0	0	1	152	1	0	0
Grc38_ENST00000629167|miRNA	13	23	25	1	1	1	11	15	32	0	0	0
Grc38_ENST00000629173|miRNA	16	23	6	0	0	0	0	2	6	0	1	1
Grc38_ENST00000629190|miRNA	4	2	1	0	0	0	2	7	17	1	0	0
Grc38_ENST00000629248|miRNA	3	3	4	4	3	3	1	7	7	0	3	0
Grc38_ENST00000629259|miRNA	117	207	162	1	6	4	184	211	142	2	0	1
Grc38_ENST00000629282|miRNA	13	14	41	0	0	0	0	1	31	0	0	0
Grc38_ENST00000629284|miRNA	14	17	5	0	0	0	0	1	3	0	0	0
Grc38_ENST00000629348|miRNA	4	0	0	4	3	12	4	1	9	1	5	2
Grc38_ENST00000629398|miRNA	8	8	3	0	1	1	0	0	2	0	0	0
Grc38_ENST00000629414|miRNA	4	2	1	0	0	0	0	0	3	0	0	0
Grc38_ENST00000629478|snRNA	11	25	16	1	0	0	19	20	68	0	1	0
Grc38_ENST00000629536|snoRNA	27	36	38	0	2	0	33	33	60	0	0	0
Grc38_ENST00000629629|snoRNA	9	21	14	0	1	0	13	9	12	0	0	0
Grc38_ENST00000629637|miRNA	0	1	2	0	1	4	0	3	3	2	2	0
Grc38_ENST00000629772|miRNA	0	0	0	2	1	8	0	0	0	6	1	3
Grc38_ENST00000629784|miRNA	2	11	10	0	0	0	10	9	16	0	0	0
Grc38_ENST00000629851|miRNA	2	6	2	3	3	4	2	12	5	1	1	0
Grc38_ENST00000629887|miRNA	3	1	2	2	1	0	0	0	0	0	0	1
Grc38_ENST00000629919|miRNA	11	17	6	2	2	4	4	13	15	1	0	0
Grc38_ENST00000630005|miRNA	5	9	7	3	5	4	0	9	6	1	7	1
Grc38_ENST00000630014|miRNA	3	9	12	16	20	30	6	8	8	12	24	12
Grc38_ENST00000630075|miRNA	0	0	1	3	0	1	0	0	4	1	2	0
Grc38_ENST00000630092|snoRNA	58	82	93	4	4	2	49	64	130	3	4	2
Grc38_ENST00000630110|miRNA	22	39	52	14	4	2	41	49	34	0	4	2
Grc38_ENST00000630148|miRNA	2	0	0	0	0	8	0	1	4	1	4	0
Grc38_ENST00000630193|miRNA	1	0	2	1	2	4	1	1	2	2	5	6
Grc38_ENST00000630292|miRNA	14	12	5	0	0	0	1	0	5	1	0	1
Grc38_ENST00000630372|miRNA	129	77	35	0	0	2	1	0	48	0	0	0
Grc38_ENST00000630379|miRNA	6531	12348	11829	3961	4346	3806	7764	9801	15350	1452	4945	1951
Grc38_ENST00000630402|miRNA	618	1361	1695	837	639	509	768	1038	2111	404	649	594
Grc38_ENST00000630429|snoRNA	24	49	25	0	0	0	21	33	62	0	0	0
Grc38_ENST00000630434|miRNA	2	1	5	0	1	0	0	1	2	0	0	0
Grc38_ENST00000630509|miRNA	0	6	7	1	1	0	1	7	16	0	0	2
Grc38_ENST00000630515|miRNA	8	12	11	0	0	0	5	6	27	0	0	0
Grc38_ENST00000630551|miRNA	13	32	19	42	64	55	11	27	31	10	56	16
Grc38_ENST00000630554|miRNA	4	6	9	0	0	0	1	8	8	0	0	0
Grc38_ENST00000630620|miRNA	80	158	156	694	392	264	95	109	265	328	436	547
Grc38_ENST00000630688|snRNA	44	68	67	1	0	1	0	2	61	0	0	0
Grc38_ENST00000630692|miRNA	73	93	99	0	0	0	0	0	82	0	0	0
Grc38_ENST00000630737|snoRNA	1	1	4	0	0	0	0	1	2	0	1	0
Grc38_ENST00000630744|miRNA	8	21	15	16	20	13	9	9	12	44	27	31
Grc38_ENST00000630765|miRNA	11	16	8	1	2	0	0	0	14	0	0	0
Grc38_ENST00000630786|miRNA	14	19	31	30	50	46	17	14	24	9	35	17
Grc38_ENST00000630788|miRNA	7	11	20	27	51	49	5	19	8	15	42	14
Grc38_ENST00000630877|snoRNA	3	4	0	0	0	1	0	0	3	2	2	4
Grc38_ENST00000630934|miRNA	20	4	4	0	0	0	0	1	4	0	0	0
Grc38_ENST00000630949|snoRNA	56	74	82	2	1	3	70	73	72	0	0	0
Grc38_ENST00000630984|miRNA	2	1	1	2	15	12	1	1	6	4	8	3
Grc38_ENST00000630990|miRNA	6974	12516	10424	5415	6113	5600	8893	10175	17697	1509	6699	2446
Grc38_ENST00000631155|miRNA	2	8	3	4	6	6	5	5	9	2	6	5
Grc38_ENST00000631261|miRNA	0	0	0	9	5	6	1	4	1	0	5	1
Grc38_ENST00000631287|miRNA	2	3	4	4	0	0	3	2	2	0	0	0
Grc38_ENST00000631292|snoRNA	70	96	119	13	5	4	59	88	123	2	7	4
Grc38_ENST00000631329|miRNA	7	12	13	1	1	2	2	6	21	2	1	2
Grc38_ENST00000631369|miRNA	0	4	2	0	1	0	0	0	3	0	0	0
mirBASE_bta-miR-2889	15	14	9	303	420	238	7	17	44	660	699	731
mirBASE_efT-miR-26c	1869	2859	2150	787	215	428	2226	2153	1672	94	194	91
mirBASE_hsa-miR-4485-3p	16	32	8	174	47	86	10	26	19	35	122	29
mirBASE_mmT-miR-5100	0	4	1	14	12	18	2	8	6	0	8	4
mirBASE_oha-miR-100-5p	2961	3472	2406	3670	921	1310	5203	6143	1365	825	1355	532
mirBASE_sha-miR-21	7862	11933	10937	7999	3063	4905	35477	41227	22743	1938	4843	1233
mirBASE_tch-miR-27a-3p	950	927	639	113	39	40	2097	1413	936	18	30	14
piRNA|DQ569993	975	1248	1009	0	6	6	1862	1445	997	2	0	2
piRNA|DQ570011	1	5	2	0	0	0	1	4	0	0	1	0
piRNA|DQ570344	9	5	8	14	15	24	5	15	24	4	22	7
piRNA|DQ570485	4	5	0	2	11	7	0	1	1	0	12	1
piRNA|DQ570720	2	5	1	0	1	0	0	5	5	2	1	0
piRNA|DQ570812	187	270	101	134	173	183	111	225	313	109	260	72
piRNA|DQ570815	1	2	0	4	3	4	0	1	2	0	4	0
piRNA|DQ570940	11265	15141	12023	16542	19414	20802	9691	15986	15462	7649	21810	7438
piRNA|DQ570956	4092	4369	3629	204180	166502	164671	3837	5464	3552	35199	205486	52906
piRNA|DQ570968	108	136	50	105	186	118	59	130	196	75	134	56
piRNA|DQ570989	0	3	2	5	8	0	0	1	2	0	2	0
piRNA|DQ570992	182	189	144	3590	1814	2221	210	252	393	1011	2272	1523
piRNA|DQ570994	1	8	2	0	0	0	4	3	3	0	0	0
piRNA|DQ570996	1	1	1	2	3	2	0	0	0	0	3	1
piRNA|DQ571031	216	210	105	780	865	1143	259	304	555	1501	1093	4197
piRNA|DQ571107	0	0	1	5	4	0	0	0	0	0	1	0
piRNA|DQ571367	25	24	60	0	0	0	0	0	39	0	0	0
piRNA|DQ571511	16	41	34	0	0	0	25	20	19	0	0	0
piRNA|DQ571524	409	803	727	2380	1310	1904	348	673	652	662	2841	534
piRNA|DQ571526	3107	5540	3087	1121	1136	1486	3100	4772	2124	928	1804	844
piRNA|DQ571550	732	970	636	1914	2107	1643	518	1089	3141	879	1724	598
piRNA|DQ571699	3	6	1	0	0	0	0	0	2	0	0	0
piRNA|DQ571813	891	512	412	27710	14773	13630	972	1013	475	4021	13331	4674
piRNA|DQ571823	714	1289	802	843	885	980	623	1204	1823	292	866	274
piRNA|DQ571873	20623	36930	24457	20421	25145	28038	17116	32234	33526	6942	25831	7179
piRNA|DQ572175	102	81	32	0	0	0	0	0	19	0	0	0
piRNA|DQ572382	2	2	1	7	4	6	0	1	2	1	2	0
piRNA|DQ572385	5	7	3	0	1	0	0	0	1	0	0	0
piRNA|DQ572465	11	6	4	9	7	8	3	4	9	1	11	3
piRNA|DQ572467	3	4	6	1	0	1	2	2	3	0	1	0
piRNA|DQ572561	2	3	4	1	2	1	2	1	1	0	2	1
piRNA|DQ572566	1	1	2	0	0	0	0	1	5	0	0	0
piRNA|DQ572769	0	1	0	0	0	0	0	0	0	74	0	60
piRNA|DQ573178	12	50	1	0	0	0	0	0	4	0	0	0
piRNA|DQ573304	7	7	3	0	0	0	0	0	3	0	0	0
piRNA|DQ573323	10	38	34	33	36	42	26	17	62	19	33	17
piRNA|DQ573352	1239	2395	1544	838	944	1095	1101	2043	3072	280	985	228
piRNA|DQ574090	0	0	0	4	1	1	0	0	0	0	4	0
piRNA|DQ574254	1	1	4	1	2	5	0	2	5	0	5	0
piRNA|DQ574264	4	6	2	0	0	0	0	0	2	0	0	0
piRNA|DQ574391	3	8	6	4	1	2	0	5	7	3	0	0
piRNA|DQ574448	2	0	3	4	5	10	2	2	3	0	1	0
piRNA|DQ574511	0	0	0	0	0	0	0	0	0	1	0	9
piRNA|DQ574619	6	3	0	3	0	1	2	3	1	0	0	0
piRNA|DQ575036	2	9	4	2	3	1	3	2	10	1	4	2
piRNA|DQ575380	0	0	2	6	3	8	0	1	1	1	3	1
piRNA|DQ575656	3	2	5	915	640	452	6	3	4	284	405	300
piRNA|DQ575658	41	24	60	2116	1540	1385	27	33	80	611	1149	960
piRNA|DQ575660	3011	1728	2327	762337	498711	419538	2131	2370	2593	212553	393260	311542
piRNA|DQ575721	0	0	0	0	2	6	0	0	0	0	4	0
piRNA|DQ575882	372	255	124	87067	74368	90208	293	284	207	14372	103250	16698
piRNA|DQ575884	466	322	195	87540	74791	90716	574	431	246	14372	104013	16896
piRNA|DQ576200	278	152	87	104	146	123	232	241	187	69	149	42
piRNA|DQ576377	4	1	3	0	0	0	0	1	0	0	0	3
piRNA|DQ576604	6	11	6	19	15	8	2	6	4	9	7	2
piRNA|DQ576605	4	9	7	16	30	29	7	8	13	25	10	1
piRNA|DQ576872	224	100	87	47533	58679	63825	170	185	171	26137	99711	38604
piRNA|DQ576880	2	6	2	17	5	14	1	0	3	2	18	6
piRNA|DQ576917	0	5	6	3	2	8	2	0	8	0	17	2
piRNA|DQ576918	20	22	27	130	153	364	26	51	44	48	217	44
piRNA|DQ576952	1	1	1	0	0	0	3	3	1	0	0	0
piRNA|DQ577008	14	35	28	19	15	36	20	18	46	15	30	7
piRNA|DQ577216	6	5	2	0	0	0	0	0	3	0	0	0
piRNA|DQ577346	0	4	0	1	1	2	2	1	2	2	6	1
piRNA|DQ577620	0	4	0	5	0	1	1	1	7	0	2	0
piRNA|DQ577772	7	23	15	131	165	174	18	22	29	67	131	62
piRNA|DQ578126	0	2	2	1	5	3	0	2	3	0	1	0
piRNA|DQ578315	19	29	3	0	0	0	0	0	0	0	0	0
piRNA|DQ578516	1	1	0	4	3	6	0	1	0	0	6	0
piRNA|DQ578534	0	1	1	3	0	0	1	2	4	0	5	0
piRNA|DQ578783	1723	2070	1619	1825	1878	2040	1701	2472	1494	782	2063	727
piRNA|DQ578787	4	10	4	4	8	2	1	1	5	1	1	1
piRNA|DQ578846	1	6	2	8	7	7	0	3	7	4	3	0
piRNA|DQ578918	1	0	16	0	0	0	0	0	17	0	0	0
piRNA|DQ579049	1	1	0	1	2	2	0	4	2	2	2	1
piRNA|DQ579110	2	37	4	0	0	0	0	0	4	0	0	0
piRNA|DQ579298	1	1	1	2	2	2	0	1	1	0	1	0
piRNA|DQ579415	3	4	2	0	0	0	0	0	1	0	0	0
piRNA|DQ579430	22	9	5	0	0	0	0	0	8	0	0	0
piRNA|DQ579855	0	6	1	1	0	0	1	1	2	1	1	0
piRNA|DQ579858	12	4	11	0	0	0	0	0	8	0	0	0
piRNA|DQ580006	7	16	9	6	10	11	5	18	17	2	8	0
piRNA|DQ580140	0	4	0	1	4	0	0	0	2	0	0	0
piRNA|DQ580256	4	3	1	10	1	2	0	2	4	0	5	0
piRNA|DQ580509	58	83	18	0	0	0	0	0	18	0	0	0
piRNA|DQ580576	2	1	1	1	7	3	2	0	4	0	2	0
piRNA|DQ580639	34	25	9	0	0	0	0	0	5	0	0	0
piRNA|DQ580854	1343	2377	1125	2034	2318	2391	1300	2059	3304	985	2257	866
piRNA|DQ580927	12	12	18	10	13	19	7	7	34	11	14	12
piRNA|DQ581351	0	5	0	0	5	0	0	1	3	1	0	0
piRNA|DQ581881	2	1	0	5	3	1	3	0	3	0	0	0
piRNA|DQ581894	3	5	4	0	1	6	1	8	9	0	1	1
piRNA|DQ582243	358	412	139	0	0	0	0	1	112	0	0	0
piRNA|DQ582264	22	49	26	161	162	240	30	35	44	87	281	65
piRNA|DQ582451	3	10	0	0	0	0	0	0	1	0	0	0
piRNA|DQ582536	49	64	56	1	0	0	98	60	55	0	0	0
piRNA|DQ582566	87883	99015	48752	24597	30981	33167	79563	75037	97816	9713	28485	9235
piRNA|DQ582657	1	3	2	2	0	1	0	2	0	0	0	0
piRNA|DQ582815	0	3	1	3	3	2	0	2	3	2	1	1
piRNA|DQ582827	3	1	1	0	0	0	0	1	4	0	2	0
piRNA|DQ582838	7	5	18	10	28	26	9	9	13	20	21	26
piRNA|DQ582923	2	0	0	4	0	3	0	0	2	0	5	2
piRNA|DQ582940	8	0	2	0	0	0	0	0	7	0	0	0
piRNA|DQ583032	7	1	2	0	0	3	1	0	3	0	1	0
piRNA|DQ583045	0	0	0	1	5	5	0	0	0	2	1	0
piRNA|DQ583080	0	1	0	3	7	5	2	3	1	0	3	1
piRNA|DQ583324	1	2	4	3	3	0	2	2	4	0	1	1
piRNA|DQ583699	0	0	2	1	1	4	0	1	3	1	1	0
piRNA|DQ583836	0	3	2	0	4	0	0	3	1	0	1	1
piRNA|DQ584132	1	2	0	2	4	0	0	0	0	1	4	2
piRNA|DQ584144	3	2	1	0	3	1	1	2	1	2	1	0
piRNA|DQ584149	15	21	23	0	0	0	0	0	11	0	0	0
piRNA|DQ584318	16	13	23	0	0	0	0	0	22	0	0	0
piRNA|DQ584569	0	2	5	0	3	3	1	2	3	0	3	0
piRNA|DQ584635	0	2	1	0	0	6	0	0	1	0	1	1
piRNA|DQ584698	459	953	585	949	902	1358	586	685	392	606	1742	422
piRNA|DQ584770	4	5	1	0	0	0	0	0	2	0	0	0
piRNA|DQ585088	25	31	28	29	26	73	15	19	34	4	34	5
piRNA|DQ585261	0	2	0	3	6	4	0	2	0	0	4	0
piRNA|DQ585292	15	25	21	6	17	8	5	21	27	2	7	1
piRNA|DQ585299	5	8	5	2	0	0	1	1	0	0	0	0
piRNA|DQ585304	0	2	2	2	5	8	1	0	3	0	4	1
piRNA|DQ585435	8	22	16	0	0	0	0	0	10	0	0	0
piRNA|DQ585628	2	10	6	0	0	0	7	6	3	0	0	0
piRNA|DQ585854	0	2	3	0	0	0	2	0	3	3	0	1
piRNA|DQ586098	12	15	11	3	15	9	1	4	14	4	15	1
piRNA|DQ586108	1	3	5	0	0	0	0	2	2	0	0	0
piRNA|DQ586183	5	7	12	10	8	12	1	8	11	1	9	1
piRNA|DQ586566	1	0	0	0	3	0	0	0	0	1	4	2
piRNA|DQ586628	1	4	3	0	0	0	0	0	2	0	0	0
piRNA|DQ586741	1	7	0	3	0	4	1	3	1	0	3	1
piRNA|DQ586935	0	0	34	0	0	0	0	0	42	0	0	0
piRNA|DQ587229	7	18	5	10	2	3	9	13	4	2	3	2
piRNA|DQ587402	1	3	1	3	0	0	1	1	3	0	0	0
piRNA|DQ587425	4	8	15	0	0	0	0	0	12	0	0	0
piRNA|DQ587514	909	2071	1794	5	7	9	1926	1908	645	2	4	4
piRNA|DQ587619	34	32	46	0	0	0	0	0	47	0	0	0
piRNA|DQ588525	4	1	1	9	2	7	6	1	6	2	2	1
piRNA|DQ588594	7	20	16	57	39	39	7	3	19	21	51	31
piRNA|DQ588628	33	34	34	0	0	0	0	0	35	0	0	0
piRNA|DQ589377	0	2	0	3	1	2	2	1	3	0	1	0
piRNA|DQ589692	3	5	1	0	0	0	0	0	1	0	0	0
piRNA|DQ589802	3	3	0	5	0	0	1	2	1	0	0	0
piRNA|DQ590011	2	8	50	0	0	0	0	0	70	0	0	0
piRNA|DQ590013	1387	1770	1379	23944	25826	30128	1835	3482	1964	14850	35800	8995
piRNA|DQ590139	2	12	4	2	0	0	0	0	4	10110	14	11566
piRNA|DQ590387	0	1	3	1	1	3	0	1	1	0	2	0
piRNA|DQ590404	2252	4373	2490	2027	2175	2515	2268	3733	6216	698	2455	647
piRNA|DQ590448	28	26	1	0	0	0	0	0	2	0	0	0
piRNA|DQ590492	1	5	7	7	9	14	3	5	7	6	8	0
piRNA|DQ590548	70	150	108	6630	4054	3795	74	165	100	833	4168	1106
piRNA|DQ590642	7	12	9	12	9	12	2	6	12	1	5	3
piRNA|DQ590835	79	194	236	298	378	318	125	138	276	100	279	99
piRNA|DQ591115	2	7	2	0	0	0	0	0	2	0	0	0
piRNA|DQ591773	1	0	0	2	0	4	2	0	1	0	8	0
piRNA|DQ591959	2	3	4	0	0	0	0	0	6	0	0	0
piRNA|DQ592016	6	6	2	0	0	0	0	0	8	0	0	0
piRNA|DQ592048	1	5	3	3	5	6	1	2	1	0	4	1
piRNA|DQ592146	2	2	0	1	2	0	3	2	1	0	2	1
piRNA|DQ592148	8	15	15	5	1	2	9	8	15	1	4	1
piRNA|DQ592265	17	36	31	0	0	0	0	0	41	0	0	0
piRNA|DQ592293	3	9	7	0	0	0	0	0	9	0	0	0
piRNA|DQ592393	10	3	2	0	0	0	0	0	2	0	0	0
piRNA|DQ592852	1	9	3	0	0	0	0	0	7	0	0	0
piRNA|DQ592859	2	5	9	0	0	0	0	0	12	0	0	0
piRNA|DQ592931	9	6	0	66	27	26	9	9	5	24	30	30
piRNA|DQ592932	8	3	2	61	17	23	4	8	3	18	21	29
piRNA|DQ592953	329	185	256	59909	40493	32227	226	284	291	17159	32075	25108
piRNA|DQ593039	84005	156309	125566	50141	55366	47871	107544	126697	158513	25104	60470	35468
piRNA|DQ593158	2	2	1	0	0	1	0	3	1	1	0	0
piRNA|DQ593325	14	17	10	55	34	55	8	11	7	11	34	12
piRNA|DQ593356	90	54	56	2364	939	1211	98	119	73	454	1159	501
piRNA|DQ593358	5	10	6	19	27	38	6	8	15	5	42	12
piRNA|DQ593407	6	2	1	83	61	104	1	4	1	27	94	34
piRNA|DQ593423	1	0	0	9	17	17	1	0	1	5	21	13
piRNA|DQ593431	20	15	13	2	14	14	71	102	16	8	16	8
piRNA|DQ593888	2	4	1	0	3	0	0	0	0	1	0	0
piRNA|DQ594117	1	11	5	2	5	3	0	5	3	1	8	0
piRNA|DQ594176	5	3	0	0	0	0	0	0	3	0	0	0
piRNA|DQ594273	2	2	2	2	2	1	1	1	3	0	2	0
piRNA|DQ594453	2619	1466	1985	635080	411688	348345	1947	1954	2479	182879	312199	259412
piRNA|DQ594465	904	728	407	126567	111212	135117	1043	918	477	29030	156220	40607
piRNA|DQ594522	2	3	1	0	0	0	0	0	5	0	0	0
piRNA|DQ594655	0	1	0	0	3	3	0	0	0	2	2	0
piRNA|DQ594740	65034	122432	60819	31646	34317	41314	77803	102435	128143	9761	38911	8829
piRNA|DQ594983	1	2	2	1	1	2	1	2	3	0	1	0
piRNA|DQ594989	0	3	2	0	0	0	1	2	4	0	0	0
piRNA|DQ595111	0	5	7	4	1	3	3	1	5	0	3	1
piRNA|DQ595197	1	2	1	3	3	0	0	0	1	0	4	0
piRNA|DQ595229	0	2	2	5	0	0	0	1	4	0	2	0
piRNA|DQ595297	4	2	3	0	0	0	0	0	1	0	0	0
piRNA|DQ595353	1	7	2	0	1	3	4	2	0	1	3	3
piRNA|DQ595425	0	1	1	1	2	1	1	0	2	0	0	1
piRNA|DQ595432	2	4	2	0	0	0	0	0	2	0	0	0
piRNA|DQ595445	3	4	4	0	0	0	0	0	2	0	0	0
piRNA|DQ595536	3371	3248	5531	16227	10941	10401	2462	3961	8049	2722	11317	3091
piRNA|DQ595788	0	0	0	0	0	0	0	0	0	7	0	7
piRNA|DQ595848	1	0	1	2	6	3	0	2	0	0	1	0
piRNA|DQ596044	1	0	0	1	4	11	0	0	0	1	9	0
piRNA|DQ596183	880	1987	1290	1060	1243	1444	942	1407	1814	358	1399	385
piRNA|DQ596408	0	5	27	0	0	0	0	0	29	0	0	0
piRNA|DQ596455	14	20	12	26	27	22	7	19	22	10	17	10
piRNA|DQ596538	495	608	228	967	1208	1109	253	600	939	859	1213	627
piRNA|DQ596805	1176	1177	842	9303	7302	9003	447	1082	1155	2917	11891	2264
piRNA|DQ596988	0	0	1	5	1	2	1	2	2	2	2	1
piRNA|DQ596992	1699	3131	2366	1288	1445	1216	1625	2280	2572	346	1249	333
piRNA|DQ597086	3	4	2	0	0	0	0	0	1	0	0	0
piRNA|DQ597110	14	19	10	728	414	442	16	18	10	54	579	61
piRNA|DQ597215	3	2	2	136	71	89	6	7	7	33	57	84
piRNA|DQ597217	0	1	0	47	34	36	0	0	2	15	28	41
piRNA|DQ597218	146	184	296	3987	3559	3814	144	241	438	4376	5267	8382
piRNA|DQ597228	2	1	1	0	1	0	1	1	4	0	3	1
piRNA|DQ597341	29	31	14	289	115	184	25	31	47	73	168	105
piRNA|DQ597347	662	564	446	29747	13995	16742	779	899	769	5273	15021	5457
piRNA|DQ597397	264	453	493	1424	691	875	9	18	469	1943	760	2608
piRNA|DQ597403	538	509	481	8340	2263	2904	578	423	564	807	2058	1249
piRNA|DQ597482	195	368	288	1688	1492	1903	131	327	452	516	1820	367
piRNA|DQ597484	2891	4691	2914	1702	2005	2314	2339	3988	2166	1586	3146	1165
piRNA|DQ597916	4256	4598	4322	216089	161166	152469	3720	5761	3925	36898	214718	56276
piRNA|DQ597945	2	3	3	0	1	0	0	5	5	0	0	0
piRNA|DQ597960	0	0	1	1	3	0	0	0	1	0	0	4
piRNA|DQ597968	2	5	7	2	0	2	7	3	6	16	7	13
piRNA|DQ597970	4	1	13	7	7	8	5	4	3	9	4	9
piRNA|DQ597971	63	116	115	663	682	460	17	11	95	8816	590	8496
piRNA|DQ597975	244	108	73	50377	61997	66719	202	185	209	28458	106018	41770
piRNA|DQ597997	2979	5388	3401	2041	2164	2388	2922	4707	6105	565	2092	541
piRNA|DQ598008	109	53	48	8890	10695	12023	136	152	84	8839	9555	14242
piRNA|DQ598016	0	0	0	8	11	7	0	2	1	6	9	3
piRNA|DQ598041	1	11	1	0	0	0	0	0	1	0	0	0
piRNA|DQ598072	1	4	3	0	0	0	3	3	3	0	0	0
piRNA|DQ598167	612	950	585	1304	1476	1324	511	924	2054	740	1281	852
piRNA|DQ598175	5	7	5	67	73	79	3	12	23	6	77	9
piRNA|DQ598180	1	0	1	23	21	28	0	1	1	36	16	50
piRNA|DQ598183	15	28	28	167	218	215	27	25	18	12874	171	24948
piRNA|DQ598252	95	79	53	721	402	627	106	123	95	164	554	121
piRNA|DQ598263	5445	9714	7089	4656	5680	5907	4899	8780	10040	2180	6253	1982
piRNA|DQ598300	7	6	1	0	0	0	0	0	6	0	0	0
piRNA|DQ598312	22	13	48	403	309	350	25	20	106	689	384	1031
piRNA|DQ598409	0	2	3	4	2	6	1	0	4	0	3	1
piRNA|DQ598410	4	7	1	0	0	0	0	0	0	0	0	0
piRNA|DQ598445	792	1330	790	1605	1823	1922	468	1125	1829	619	2081	575
piRNA|DQ598639	9	28	23	105	65	112	21	17	21	28	115	30
piRNA|DQ598646	103	139	179	1	0	0	190	161	156	0	1	0
piRNA|DQ598675	58	78	62	801	459	562	73	87	44	299	760	265
piRNA|DQ598677	362	239	160	34007	30955	40228	315	327	236	5987	43693	8041
piRNA|DQ598806	31	30	11	0	0	0	0	1	15	0	0	0
piRNA|DQ598921	18	30	42	0	0	0	0	0	55	0	0	0
piRNA|DQ598942	10	11	0	0	0	0	0	0	3	0	0	0
piRNA|DQ598951	38	58	50	35	45	70	30	52	58	17	62	10
piRNA|DQ599034	8	1	0	0	0	0	2	0	0	0	0	0
piRNA|DQ599058	2	7	3	3	6	4	0	2	2	1	6	0
piRNA|DQ599147	58	77	59	26	15	16	22	21	127	20	27	12
piRNA|DQ599478	0	3	0	0	0	0	0	0	0	31	0	24
piRNA|DQ599501	0	0	0	0	0	9	1	0	0	0	0	0
piRNA|DQ599791	1	4	8	5	3	1	4	2	7	3	0	0
piRNA|DQ599818	1	1	1	2	0	4	1	2	4	1	2	1
piRNA|DQ599865	5	5	0	0	0	0	0	0	0	0	0	0
piRNA|DQ600373	5	4	6	0	0	0	0	0	3	0	0	0
piRNA|DQ600380	1	1	1	1	0	2	0	1	3	0	1	0
piRNA|DQ600689	4	3	0	1	2	1	0	2	0	0	2	0
piRNA|DQ600708	9	16	0	0	0	0	0	0	1	0	0	0
piRNA|DQ600754	2	2	0	7	0	0	1	3	2	0	2	0
piRNA|DQ600890	14	11	16	0	0	0	0	0	19	0	0	0
piRNA|DQ600952	18	10	8	33	34	68	21	20	27	16	37	17
piRNA|DQ601078	2	7	0	0	0	0	0	1	0	0	0	0
piRNA|DQ601103	6	3	57	0	0	0	0	0	47	1	0	0
piRNA|DQ601350	3	6	6	7	0	0	0	0	3	0	0	0
piRNA|DQ601906	1	1	3	10	2	0	0	2	1	1	2	0
piRNA|DQ601938	38	44	34	0	0	0	0	0	46	0	0	0
siRNA_0_4501882	0	4	1	6	2	0	1	1	6	2	3	1
siRNA_1045_39812410	2	5	5	1	2	1	3	1	4	3	1	0
siRNA_177_4885510	0	0	0	4	1	3	0	0	0	0	4	0
siRNA_277_7669491	4	8	11	6	5	7	4	7	11	1	12	1
siRNA_308_10834981	1	1	0	7	4	12	0	1	0	3	2	0
siRNA_496_14277699	1	2	3	1	5	3	0	1	5	3	4	0
siRNA_499_14591908	0	3	1	0	2	0	1	3	0	0	1	0
siRNA_515_14591914	2	4	3	7	4	13	5	2	13	5	11	3
siRNA_516_14591915	2	2	1	0	1	3	0	1	3	2	0	0
siRNA_520_14591916	1	2	3	4	4	2	1	1	4	0	3	1
siRNA_521_14670385	2	6	6	2	9	13	1	5	5	0	7	0
siRNA_531_14790142	0	3	2	1	1	3	0	2	1	0	0	0
siRNA_535_14916502	1	2	3	5	2	0	0	1	4	0	0	0
siRNA_537_15011935	1	1	4	2	3	9	0	3	7	2	1	0
siRNA_539_15011937	5	10	5	0	5	3	3	3	5	2	6	0
siRNA_563_15718688	1	2	5	8	8	6	1	2	5	6	8	1
siRNA_575_16306563	3	0	3	0	2	1	1	2	1	0	0	0
siRNA_58_4506760	2	3	1	0	2	0	0	3	2	0	2	0
siRNA_580_16905512	1	0	0	0	0	6	0	0	0	0	5	1
siRNA_599_17158043	2	4	1	0	4	1	1	2	8	0	2	0
siRNA_637_19743822	5	3	2	0	0	1	4	1	6	0	6	2
siRNA_802_24475893	1	3	3	1	0	4	0	2	1	0	2	0
siRNA_820_27436945	0	2	1	0	1	2	1	0	2	0	2	0
siRNA_965_34335149	2	2	0	0	0	0	4	0	1	1	1	0
snoRNADB_E3	54	120	71	0	1	1	57	88	103	1	0	1
snoRNADB_HBII-135	93	244	200	0	2	2	117	181	134	0	0	0
snoRNADB_HBII-202	125	213	201	1	3	2	167	193	116	4	0	2
snoRNADB_U104	204	365	329	3	1	3	219	271	161	0	4	4
snoRNADB_U17b	103	248	172	0	1	5	89	176	156	5	3	9
Y_RNA_AABR05113607.1/617-718	309	456	276	495	380	604	313	369	574	147	268	189
Y_RNA_AADD01087475.1/2469-2552	420	983	701	1697	3114	3166	935	731	1130	1232	4342	2116
Y_RNA_AADN03001926.1/468172-468061	8	7	6	132	110	135	7	8	8	45	121	62
Y_RNA_AAFC03099237.1/8865-8959	65	55	45	3136	1791	1981	82	87	95	894	1784	810
Y_RNA_AAFC03099238.1/121707-121818	388	436	272	10650	10165	12387	654	504	346	4687	10404	4844
Y_RNA_AAFR03014070.1/16387-16488	27	15	9	327	141	204	21	25	9	69	76	148
Y_RNA_AAHX01030026.1/7139-7028	350	259	215	10371	10090	12271	510	390	223	4736	10320	4754
Y_RNA_AANT01114500.1/1882-1983	342	411	307	540	423	612	329	367	544	165	271	218
Y_RNA_AAPE02039776.1/102994-103096	566	672	463	1709	1449	2114	510	565	891	499	1205	579
Y_RNA_AAPN01172659.1/53662-53775	2	5	1	33	41	29	6	1	2	13	26	14
Y_RNA_AAPY01489510.1/220-119	501	599	408	3078	2618	3452	452	500	836	1047	2305	1152
Y_RNA_AAQR03087348.1/2666-2565	464	520	344	2622	2375	3152	405	435	725	890	2139	971
Y_RNA_AAQR03087350.1/1071-976	22	17	8	361	245	227	26	27	24	129	237	151
Y_RNA_AAWR02036109.1/33571-33459	318	315	208	10664	10120	12515	550	424	255	4703	10210	4766
Y_RNA_AAYZ01133134.1/5808-5901	640	650	388	89063	80251	74659	993	1024	485	36589	70665	38240
Y_RNA_ABDC01212300.1/2415-2498	3	5	9	14	10	14	2	3	9	3	17	4
Y_RNA_ABDC01601884.1/580-486	27	30	14	899	783	680	47	41	67	345	653	405
Y_RNA_AC073140.5/117955-118049	615	613	373	88852	79706	74755	1087	992	469	35728	69380	37090
Y_RNA_AC190269.3/73147-73248	469	516	371	2600	2421	3135	433	439	732	915	2086	945
Y_RNA_AC191785.1/102750-102844	14	15	17	770	736	611	22	16	36	283	592	333
Y_RNA_AC193857.1/159000-159109	4	4	7	83	86	109	4	4	7	36	100	25
Y_RNA_AC199101.3/202469-202368	19	24	22	26	26	34	15	23	48	5	15	4
Y_RNA_AC205306.6/147779-147685	660	548	381	89796	79249	72629	914	928	393	36202	69449	37324
Y_RNA_CT104657.1/45296-45390	602	593	388	88934	79556	73599	895	882	382	35854	69649	36979
Y_RNA_CT104669.1/59726-59616	0	5	5	15	20	18	5	8	9	10	17	6
