# Supplementary material for: Differential distribution and enrichment of non-coding RNAs in exosomes from normal and Cancer-associated fibroblasts in colorectal cancer
Source: Mol Cancer. 2018 Aug 3;17:114. doi: 10.1186/s12943-018-0863-4 (PMC6091058; doi:10.1186/s12943-018-0863-4)
Supplement: Supplementary file 5 — Excel file with two documents summarizing the results obtained from the differential expression NF-CELL versus NF-EXO analyses for differentially distributed lncRNAs and sncRNAs. (XLSX 73 kb) [file 12943_2018_863_MOESM5_ESM.xlsx]

## Sheet: lncRNAs_diff
NAME	logFC	logCPM	PValue	FDR
Grc38_ENST00000535076|processed_transcript	-7.35684	11.2219	1.06e-34	1.76e-31
Grc38_ENST00000480811|processed_transcript	-6.8668	9.51104	2.64e-24	2.2e-21
Grc38_ENST00000460249|processed_transcript	-6.8799	10.8554	1.18e-23	6.54e-21
Grc38_ENST00000492250|processed_transcript	-6.8845	10.8726	1.42e-22	5.93e-20
Grc38_ENST00000444470|processed_transcript	-8.76857	10.6954	2.3e-21	7.66e-19
Grc38_ENST00000437681|sense_intronic	-5.17748	10.4172	5.66e-21	1.45e-18
Grc38_ENST00000541416|processed_transcript	-8.06049	9.73174	6.07e-21	1.45e-18
Grc38_ENST00000412059|processed_transcript	-6.98349	10.2305	1.9e-20	3.96e-18
Grc38_ENST00000521127|processed_transcript	-7.26005	10.6566	1.36e-19	2.51e-17
Grc38_ENST00000454813|processed_transcript	-6.89106	10.2328	7.28e-19	1.22e-16
Grc38_ENST00000537965|processed_transcript	-6.90619	10.986	9.54e-19	1.45e-16
Grc38_ENST00000442067|processed_transcript	-8.12073	10.9419	1.51e-18	2.05e-16
Grc38_ENST00000537024|processed_transcript	-7.01276	9.98275	1.6e-18	2.05e-16
Grc38_ENST00000605502|lincRNA	-5.4173	11.0754	2.09e-18	2.49e-16
Grc38_ENST00000491009|processed_transcript	-6.71286	10.8763	3.6e-18	4e-16
Grc38_ENST00000545920|processed_transcript	-6.82225	10.0105	4.83e-18	5.03e-16
Grc38_ENST00000578757|processed_transcript	-6.22122	13.7199	7.83e-18	7.68e-16
Grc38_ENST00000422207|processed_transcript	-8.78006	10.6598	8.75e-18	8.11e-16
Grc38_ENST00000540904|processed_transcript	-7.57062	10.9874	1.18e-17	1.04e-15
Grc38_ENST00000431268|processed_transcript	-7.46777	11.611	1.52e-17	1.27e-15
Grc38_ENST00000449589|processed_transcript	-7.62165	8.1322	2.05e-17	1.63e-15
Grc38_ENST00000538654|processed_transcript	-6.18237	14.354	4.9e-17	3.71e-15
Grc38_ENST00000443799|processed_transcript	-6.72993	12.1966	6.07e-17	4.4e-15
Grc38_ENST00000544550|processed_transcript	-4.55449	7.12251	7.17e-17	4.98e-15
Grc38_ENST00000540725|processed_transcript	-6.98202	9.73961	1.03e-16	6.89e-15
Grc38_ENST00000421068|processed_transcript	-6.82224	12.1157	1.77e-16	1.13e-14
Grc38_ENST00000451607|processed_transcript	-6.41865	13.2448	2.94e-16	1.81e-14
Grc38_ENST00000577700|lincRNA	-7.45113	6.56755	3.16e-16	1.88e-14
Grc38_ENST00000497774|processed_transcript	-6.02218	13.8152	3.4e-16	1.95e-14
Grc38_ENST00000563151|lincRNA	3.9967	7.92911	4.29e-16	2.39e-14
Grc38_ENST00000607520|processed_transcript	-4.20068	8.3763	4.69e-16	2.52e-14
Grc38_ENST00000434796|processed_transcript	-6.04591	10.6868	9.67e-16	5.04e-14
Grc38_ENST00000540865|processed_transcript	-5.95589	10.731	1.16e-15	5.85e-14
Grc38_ENST00000545308|processed_transcript	-5.82235	8.77726	1.2e-15	5.88e-14
Grc38_ENST00000605533|sense_intronic	-5.79686	8.19398	1.41e-15	6.71e-14
Grc38_ENST00000537925|processed_transcript	-7.28828	9.74578	1.69e-15	7.84e-14
Grc38_ENST00000456293|processed_transcript	-6.7666	12.0125	1.79e-15	8.08e-14
Grc38_ENST00000575766|processed_transcript	-4.21595	10.0755	2.34e-15	1.03e-13
Grc38_ENST00000544983|processed_transcript	-7.1217	11.4907	3.64e-15	1.56e-13
Grc38_ENST00000501122|lincRNA	-5.00989	8.65803	4.56e-15	1.9e-13
Grc38_ENST00000577122|processed_transcript	-4.10476	10.1109	7.22e-15	2.92e-13
Grc38_ENST00000554693|lincRNA	-6.80143	11.2656	7.36e-15	2.92e-13
Grc38_ENST00000431043|processed_transcript	-6.13359	12.8119	8.82e-15	3.42e-13
Grc38_ENST00000416952|processed_transcript	-7.22718	9.2217	9.18e-15	3.48e-13
Grc38_ENST00000623395|lincRNA	4.12867	6.08995	1.46e-14	5.43e-13
Grc38_ENST00000602573|lincRNA	-6.85181	7.99783	1.75e-14	6.35e-13
Grc38_ENST00000436656|processed_transcript	-7.58513	8.38919	2.17e-14	7.68e-13
Grc38_ENST00000508832|lincRNA	-4.14425	6.68908	6.48e-14	2.25e-12
Grc38_ENST00000586231|lincRNA	-3.71948	15.5541	1.14e-13	3.9e-12
Grc38_ENST00000575226|processed_transcript	-3.94671	10.0908	1.32e-13	4.39e-12
Grc38_ENST00000611296|lincRNA	-3.64823	7.37979	1.5e-13	4.83e-12
Grc38_ENST00000427111|lincRNA	4.1577	5.3347	1.51e-13	4.83e-12
Grc38_ENST00000574846|processed_transcript	-3.93144	10.1026	1.59e-13	5e-12
Grc38_ENST00000422183|processed_transcript	-6.03081	10.6476	2.11e-13	6.52e-12
Grc38_ENST00000573457|processed_transcript	-3.71046	10.1059	2.71e-13	8.21e-12
Grc38_ENST00000567527|lincRNA	-5.15032	10.1289	2.76e-13	8.21e-12
Grc38_ENST00000576702|processed_transcript	-3.87313	10.0964	4.39e-13	1.28e-11
Grc38_ENST00000573259|processed_transcript	-3.99832	10.0737	4.52e-13	1.3e-11
Grc38_ENST00000456812|processed_transcript	-6.15081	10.6485	6.12e-13	1.73e-11
Grc38_ENST00000549804|processed_transcript	-5.29648	11.4437	6.76e-13	1.88e-11
Grc38_ENST00000576410|processed_transcript	-3.90132	10.0897	2.39e-12	6.52e-11
Grc38_ENST00000534336|lincRNA	-2.8554	9.13969	5.1e-12	1.37e-10
Grc38_ENST00000576096|processed_transcript	-3.9811	10.1095	6.43e-12	1.7e-10
Grc38_ENST00000360737|lincRNA	3.35057	5.68846	1.63e-11	4.26e-10
Grc38_ENST00000613917|lincRNA	-5.1368	8.20271	1.69e-11	4.33e-10
Grc38_ENST00000427501|processed_transcript	-6.31931	7.90565	4.87e-11	1.22e-09
Grc38_ENST00000617702|lincRNA	4.08497	6.42855	4.91e-11	1.22e-09
Grc38_ENST00000517138|scaRNA	-5.19155	5.34617	8.09e-11	1.98e-09
Grc38_ENST00000618132|lincRNA	-7.78782	4.85615	1.23e-10	2.98e-09
lncrnadb_kcnq1ot1_homosapiens_1,Homo	-5.24635	6.60474	2.14e-10	5.1e-09
lncrnadb_neat1_homosapiens_2,Homo	-4.54733	8.64545	2.27e-10	5.34e-09
Grc38_ENST00000573479|lincRNA	3.31832	6.20467	2.8e-10	6.48e-09
Grc38_ENST00000624235|lincRNA	-3.18058	6.46145	3.96e-10	9.05e-09
Grc38_ENST00000582965|lincRNA	-5.08275	5.20074	9.72e-10	2.19e-08
lncrnadb_mt-lipcar_hg_1,Homo	3.64753	10.2844	1.43e-09	3.16e-08
Grc38_ENST00000501143|lincRNA	4.76023	4.05022	1.44e-09	3.16e-08
Grc38_ENST00000585691|lincRNA	-8.66443	4.71218	2.42e-09	5.24e-08
Grc38_ENST00000593917|processed_transcript	3.45741	4.49645	2.48e-09	5.3e-08
Grc38_ENST00000602755|lincRNA	-5.49013	4.97562	2.61e-09	5.52e-08
Grc38_ENST00000516672|scaRNA	-3.75397	5.57592	3.32e-09	6.92e-08
Grc38_ENST00000458797|scaRNA	-3.85436	7.18287	4.21e-09	8.68e-08
Grc38_ENST00000563931|lincRNA	-4.9185	5.54192	4.48e-09	9.11e-08
Grc38_ENST00000610122|lincRNA	4.57107	4.48883	6.81e-09	1.37e-07
Grc38_ENST00000433310|lincRNA	-5.72605	6.52491	8.95e-09	1.78e-07
Grc38_ENST00000602361|lincRNA	-3.2739	10.9444	1.03e-08	2.02e-07
Grc38_ENST00000602301|vaultRNA	4.5979	10.0737	1.24e-08	2.41e-07
Grc38_ENST00000445646|lincRNA	-5.93173	5.86007	1.58e-08	3.02e-07
Grc38_ENST00000516060|scaRNA	-5.04931	4.52631	2.1e-08	3.97e-07
Grc38_ENST00000618227|lincRNA	-5.00138	4.69824	2.42e-08	4.53e-07
lncrnadb_Y-RNAs_hg_1,Homo	2.67116	12.3129	2.45e-08	4.54e-07
Grc38_ENST00000610851|lincRNA	-7.40706	4.45426	2.8e-08	5.13e-07
Grc38_ENST00000503991|scaRNA	-4.69194	8.15067	3.04e-08	5.51e-07
Grc38_ENST00000430247|lincRNA	-5.91214	6.57057	3.37e-08	6.04e-07
Grc38_ENST00000604135|sense_intronic	-4.06222	6.5041	5.2e-08	9.22e-07
Grc38_ENST00000579933|lincRNA	2.80577	5.28552	9.52e-08	1.67e-06
Grc38_ENST00000516768|scaRNA	-4.05341	9.34073	1.23e-07	2.14e-06
Grc38_ENST00000618589|lincRNA	-2.50907	13.6135	1.36e-07	2.34e-06
Grc38_ENST00000562952|sense_overlapping	-3.80479	4.79818	1.4e-07	2.38e-06
Grc38_ENST00000517097|scaRNA	-4.46598	4.85009	1.76e-07	2.97e-06
Grc38_ENST00000455929|sense_intronic	-7.33316	3.7895	1.89e-07	3.15e-06
Grc38_ENST00000567488|lincRNA	-4.17531	4.44771	1.93e-07	3.18e-06
Grc38_ENST00000511821|lincRNA	2.38995	8.04958	2.75e-07	4.5e-06
Grc38_ENST00000627324|scaRNA	-4.77531	4.27703	3.6e-07	5.83e-06
Grc38_ENST00000426282|lincRNA	-7.25376	3.64877	3.83e-07	6.15e-06
Grc38_ENST00000624278|sense_intronic	-3.30895	7.4842	4.84e-07	7.69e-06
Grc38_ENST00000624919|sense_overlapping	2.42634	7.88172	6.45e-07	1.02e-05
Grc38_ENST00000625643|scaRNA	-7.17277	3.94248	6.53e-07	1.02e-05
Grc38_ENST00000609880|lincRNA	6.80251	3.02661	8.81e-07	1.36e-05
Grc38_ENST00000445817|lincRNA	2.38691	6.1553	1.04e-06	1.59e-05
Grc38_ENST00000568885|sense_intronic	-4.08013	5.24694	1.54e-06	2.33e-05
Grc38_ENST00000602478|lincRNA	-2.12426	11.7323	1.57e-06	2.36e-05
Grc38_ENST00000591384|lincRNA	-4.98542	4.75133	1.65e-06	2.46e-05
Grc38_ENST00000430766|lincRNA	-7.36756	3.58298	1.77e-06	2.62e-05
Grc38_ENST00000569832|processed_transcript	2.50051	5.23408	2.66e-06	3.89e-05
Grc38_ENST00000454068|processed_transcript	-4.93074	4.40189	2.92e-06	4.23e-05
Grc38_ENST00000545688|processed_transcript	-6.85877	3.71602	3.96e-06	5.69e-05
Grc38_ENST00000609276|lincRNA	-4.69453	4.21257	4.44e-06	6.33e-05
Grc38_ENST00000400436|processed_transcript	-6.84608	3.79092	4.99e-06	7.05e-05
Grc38_ENST00000620778|lincRNA	-5.85868	4.57569	5.47e-06	7.66e-05
Grc38_ENST00000504082|lincRNA	2.28506	6.01751	6.11e-06	8.49e-05
Grc38_ENST00000427831|processed_transcript	-3.08263	6.06236	7.11e-06	9.81e-05
Grc38_ENST00000616527|lincRNA	-2.9566	5.23643	7.87e-06	0.00010755
Grc38_ENST00000623644|lincRNA	-2.54032	9.85658	8.37e-06	0.000113549
Grc38_ENST00000551361|processed_transcript	-4.83845	4.45567	8.7e-06	0.000117047
Grc38_ENST00000590912|lincRNA	-7.47095	3.66544	9.82e-06	0.000131093
Grc38_ENST00000623391|lincRNA	-2.54527	5.08534	1.01e-05	0.000132794
Grc38_ENST00000581170|lincRNA	2.43052	5.307	1.01e-05	0.000132794
Grc38_ENST00000568394|lincRNA	4.0552	3.17214	1.28e-05	0.000167279
Grc38_ENST00000622201|sense_intronic	2.31668	10.9935	1.3e-05	0.000168649
lncrnadb_yam-1_mm10_1,Mus	1.62961	16.3449	1.32e-05	0.000168757
Grc38_ENST00000541782|sense_intronic	-2.96464	5.93113	1.33e-05	0.000168757
Grc38_ENST00000618925|lincRNA	-6.66276	3.79626	1.57e-05	0.000198436
lncrnadb_7sl_homosapiens_1,Homo	1.48346	14.7044	1.58e-05	0.000198436
Grc38_ENST00000447950|lincRNA	-4.88955	3.7067	1.77e-05	0.00022034
Grc38_ENST00000599944|lincRNA	3.64364	2.63262	2.16e-05	0.000266725
Grc38_ENST00000427161|lincRNA	-4.66178	6.62919	2.27e-05	0.000278638
Grc38_ENST00000415386|lincRNA	2.50071	11.6072	2.32e-05	0.000282178
Grc38_ENST00000476964|sense_overlapping	-3.95245	4.53269	2.38e-05	0.000287978
Grc38_ENST00000567769|lincRNA	-3.57591	4.13112	2.69e-05	0.000322769
Grc38_ENST00000571975|sense_overlapping	-3.74708	6.84729	2.77e-05	0.000327544
Grc38_ENST00000423515|lincRNA	-6.19925	3.03955	2.77e-05	0.000327544
Grc38_ENST00000623440|sense_intronic	-3.62823	4.85458	2.79e-05	0.000327544
Grc38_ENST00000570843|lincRNA	2.59445	10.6197	3.07e-05	0.000355982
Grc38_ENST00000554333|lincRNA	-5.08154	3.90975	3.08e-05	0.000355982
Grc38_ENST00000456105|lincRNA	2.63799	4.77395	3.09e-05	0.000355982
Grc38_ENST00000629045|scaRNA	-3.05844	5.02513	3.32e-05	0.000379354
Grc38_ENST00000516089|scaRNA	-2.81689	6.26903	3.43e-05	0.000389767
Grc38_ENST00000510505|lincRNA	-3.6698	4.47236	3.77e-05	0.000424687
Grc38_ENST00000502221|lincRNA	-6.5749	3.29016	3.88e-05	0.000433981
Grc38_ENST00000587762|lincRNA	-6.31583	3.25144	3.98e-05	0.000442273
Grc38_ENST00000586185|lincRNA	-3.65246	4.67942	4.41e-05	0.000487037
Grc38_ENST00000498731|sense_overlapping	-6.85181	3.54494	4.77e-05	0.000523488
Grc38_ENST00000618845|lincRNA	-6.27791	3.01748	5.47e-05	0.0005965
Grc38_ENST00000559030|lincRNA	1.82717	5.57828	6.28e-05	0.000680474
Grc38_ENST00000629295|lincRNA	-1.77473	6.0752	6.37e-05	0.000685131
Grc38_ENST00000616691|lincRNA	-6.32844	3.60293	6.58e-05	0.000703749
Grc38_ENST00000623130|sense_overlapping	-1.87972	7.82563	7.45e-05	0.000791279
Grc38_ENST00000527332|lincRNA	-6.13787	2.94104	8.75e-05	0.000920876
Grc38_ENST00000356047|lincRNA	-3.89408	3.89992	8.78e-05	0.000920876
Grc38_ENST00000589496|3prime_overlapping_ncrna	-2.70997	5.46771	9.21e-05	0.000960168
Grc38_ENST00000609972|lincRNA	-3.41401	5.99055	0.000103318	0.0010704
Grc38_ENST00000624243|lincRNA	-3.54317	4.09344	0.000107978	0.00111177
Grc38_ENST00000626826|macro_lncRNA	-1.56154	8.73249	0.000110402	0.00112976
Grc38_ENST00000624086|processed_transcript	-3.61437	4.06931	0.000115444	0.00117145
Grc38_ENST00000501211|sense_intronic	-3.91837	3.30758	0.000115881	0.00117145
Grc38_ENST00000553465|lincRNA	-3.39236	4.54025	0.000144294	0.0014499
Grc38_ENST00000505089|lincRNA	-1.8627	5.97511	0.000154368	0.00154183
Grc38_ENST00000453784|lincRNA	-3.37914	4.21669	0.000184152	0.00182836
Grc38_ENST00000502187|lincRNA	-4.46797	3.65044	0.000185542	0.00183127
Grc38_ENST00000544868|lincRNA	-3.33329	4.2688	0.000193185	0.00188683
Grc38_ENST00000313495|lincRNA	-3.87653	3.85776	0.000193434	0.00188683
Grc38_ENST00000555004|lincRNA	-3.76823	3.30318	0.000204545	0.00198361
Grc38_ENST00000421202|processed_transcript	-3.84751	3.59443	0.000218737	0.00210898
Grc38_ENST00000562063|lincRNA	-4.41483	3.51815	0.000262972	0.0025209
Grc38_ENST00000503051|lincRNA	4.15517	3.17107	0.000268804	0.00256209
Grc38_ENST00000606393|lincRNA	-6.2799	3.02128	0.00028993	0.00274774
Grc38_ENST00000421737|lincRNA	-3.88993	3.53946	0.000315627	0.00297439
Grc38_ENST00000418574|lincRNA	-2.73898	4.17881	0.00034213	0.00320537
Grc38_ENST00000315707|lincRNA	2.18101	4.78193	0.000343981	0.00320537
Grc38_ENST00000513358|lincRNA	4.58486	2.54812	0.000365954	0.00339117
Grc38_ENST00000604849|lincRNA	2.15704	6.32352	0.000386103	0.00355812
Grc38_ENST00000452320|processed_transcript	-2.79585	5.08273	0.000390257	0.00357664
Grc38_ENST00000597619|lincRNA	-2.3988	5.09152	0.000403864	0.00368112
Grc38_ENST00000522778|lincRNA	-5.89931	3.27294	0.00042741	0.00387457
Grc38_ENST00000631258|lincRNA	-5.70509	2.63871	0.00045162	0.0040719
Grc38_ENST00000622229|lincRNA	-2.93407	3.86116	0.000460265	0.00412754
Grc38_ENST00000492337|sense_overlapping	-2.75688	4.63644	0.000486343	0.00433807
Grc38_ENST00000626287|lincRNA	-5.82687	2.82172	0.000502066	0.00444708
Grc38_ENST00000562917|lincRNA	-2.56062	4.38577	0.000503896	0.00444708
Grc38_ENST00000423943|lincRNA	4.58418	3.54769	0.00052737	0.00462975
Grc38_ENST00000436123|lincRNA	2.46975	5.11006	0.000532207	0.00464775
Grc38_ENST00000366365|processed_transcript	-2.90999	4.48537	0.000545182	0.00473627
Grc38_ENST00000489090|lincRNA	-5.67604	2.63651	0.000552061	0.0047662
Grc38_ENST00000433510|lincRNA	-6.18401	2.93386	0.000554342	0.0047662
Grc38_ENST00000620465|lincRNA	-5.74707	3.17264	0.000628893	0.00537946
Grc38_ENST00000429124|lincRNA	-5.82606	3.0422	0.000637413	0.00542452
Grc38_ENST00000516330|scaRNA	-3.75975	3.48618	0.000690118	0.00584323
Grc38_ENST00000507770|sense_intronic	-5.56676	2.81338	0.000703331	0.00592503
Grc38_ENST00000623490|lincRNA	-2.83737	3.81719	0.000708637	0.00593973
Grc38_ENST00000561622|3prime_overlapping_ncrna	-5.77554	3.13695	0.000746646	0.00622703
Grc38_ENST00000516903|scaRNA	-3.67076	3.53886	0.000755418	0.00626884
Grc38_ENST00000561320|lincRNA	-1.63354	5.98381	0.000776276	0.00641005
Grc38_ENST00000612496|lincRNA	-2.76775	4.3197	0.000793001	0.00651589
Grc38_ENST00000624601|lincRNA	-2.68224	4.40699	0.00079757	0.00652131
Grc38_ENST00000443364|lincRNA	3.59108	3.29355	0.000802819	0.0065322
Grc38_ENST00000418420|lincRNA	-3.62632	3.09406	0.000975515	0.00789883
Grc38_ENST00000452199|lincRNA	5.59019	2.28686	0.0010065	0.00811031
Grc38_ENST00000562691|sense_overlapping	-5.52975	3.04576	0.00104471	0.00837774
Grc38_ENST00000557108|processed_transcript	-2.55631	4.68485	0.00105656	0.00843229
Grc38_ENST00000544420|lincRNA	2.68959	2.58978	0.00116784	0.00927598
Grc38_ENST00000542763|lincRNA	-2.71921	3.59763	0.00118599	0.00933295
Grc38_ENST00000229465|lincRNA	-2.33959	4.33994	0.0011862	0.00933295
Grc38_ENST00000622328|lincRNA	-2.78338	4.6133	0.00119901	0.0093894
Grc38_ENST00000515329|processed_transcript	-2.61758	5.39329	0.00125405	0.00977457
Grc38_ENST00000540802|processed_transcript	-5.78642	2.72392	0.00134187	0.0104104
Grc38_ENST00000578585|lincRNA	-2.85331	4.39331	0.00143178	0.0110565
Grc38_ENST00000607458|lincRNA	-3.16557	3.7097	0.00144001	0.0110688
Grc38_ENST00000363046|ribozyme	-1.42217	7.83774	0.00146539	0.0112123
Grc38_ENST00000585863|lincRNA	-3.4705	3.22952	0.00163907	0.0124295
Grc38_ENST00000517961|lincRNA	-1.63688	6.83039	0.00163938	0.0124295
Grc38_ENST00000429829|lincRNA	-3.31353	3.8063	0.00166353	0.0125555
Grc38_ENST00000609879|processed_transcript	-3.24878	4.72573	0.00187455	0.0140685
Grc38_ENST00000609770|lincRNA	-2.98395	3.9265	0.00188086	0.0140685
Grc38_ENST00000623111|sense_overlapping	-1.67513	6.41099	0.00189543	0.0141142
lncrnadb_7sk_homosapiens_1,Homo	-1.4444	10.9584	0.00193836	0.0143697
Grc38_ENST00000501855|lincRNA	5.23642	1.98831	0.002002	0.0147107
Grc38_ENST00000548266|lincRNA	3.7575	2.2293	0.002002	0.0147107
Grc38_ENST00000619354|lincRNA	-5.59354	2.56021	0.00202758	0.0148334
Grc38_ENST00000527474|lincRNA	3.93564	2.56582	0.00212839	0.0155029
Grc38_ENST00000629902|sense_intronic	5.2353	2.02724	0.00215941	0.0156604
Grc38_ENST00000515924|scaRNA	-2.53154	4.35764	0.0021931	0.0158359
Grc38_ENST00000521725|lincRNA	3.94803	2.25782	0.00262941	0.0188674
Grc38_ENST00000591501|lincRNA	-5.77771	2.71287	0.00263555	0.0188674
lncrnadb_megamind_musmusculus_5,Mus	-2.93119	4.16249	0.00271029	0.0192566
Grc38_ENST00000612156|lincRNA	-3.0133	3.72455	0.00271302	0.0192566
Grc38_ENST00000611316|lincRNA	-3.62808	3.19485	0.0027678	0.0195623
Grc38_ENST00000527550|sense_overlapping	-2.92118	3.60665	0.00293237	0.0206379
Grc38_ENST00000619431|processed_transcript	1.40511	7.26852	0.00298363	0.0209105
Grc38_ENST00000556913|lincRNA	-5.57008	2.75595	0.00303329	0.0211696
Grc38_ENST00000503723|sense_intronic	-5.58317	2.62109	0.00313483	0.0217871
Grc38_ENST00000488425|lincRNA	3.57526	3.0623	0.00331297	0.0229296
Grc38_ENST00000625513|lincRNA	-1.95485	4.30083	0.00352461	0.0242936
Grc38_ENST00000628595|processed_transcript	-3.31245	2.82307	0.00360413	0.0247394
Grc38_ENST00000430429|lincRNA	-6.37808	3.44036	0.00369807	0.0252802
Grc38_ENST00000574616|3prime_overlapping_ncrna	-1.4876	4.98026	0.0037304	0.0253971
Grc38_ENST00000625157|lincRNA	-2.26532	3.70026	0.00375335	0.0254495
Grc38_ENST00000583426|sense_intronic	-5.57241	2.61795	0.0040427	0.0273005
Grc38_ENST00000608412|lincRNA	-5.49259	3.04382	0.00405971	0.0273048
Grc38_ENST00000565467|lincRNA	2.60138	3.05764	0.00420017	0.028136
Grc38_ENST00000501702|lincRNA	5.22766	2.31743	0.00431081	0.0287056
Grc38_ENST00000612986|sense_intronic	-2.16534	6.86442	0.0043196	0.0287056
Grc38_ENST00000612707|lincRNA	-5.37445	2.39248	0.00436275	0.0288772
Grc38_ENST00000508406|processed_transcript	3.78003	2.0982	0.00443819	0.0292605
Grc38_ENST00000619449|lincRNA	-1.79881	4.78321	0.00447697	0.0294
Grc38_ENST00000555379|processed_transcript	-5.59049	2.76465	0.0046147	0.0301856
Grc38_ENST00000616315|lincRNA	-3.42191	3.59793	0.00469009	0.0305556
Grc38_ENST00000442712|lincRNA	-5.44199	2.69185	0.0047079	0.0305556
Grc38_ENST00000610481|lincRNA	-2.76324	3.83012	0.00491487	0.0317752
Grc38_ENST00000624350|lincRNA	-2.12356	4.04686	0.00529292	0.0340872
Grc38_ENST00000433673|lincRNA	-5.14656	2.55437	0.00576588	0.0369903
Grc38_ENST00000484836|processed_transcript	-3.14511	3.2027	0.00579318	0.0370231
Grc38_ENST00000562409|sense_intronic	-2.52033	3.3951	0.00586136	0.0373158
Grc38_ENST00000420330|lincRNA	-2.9876	3.43114	0.00591157	0.0374924
Grc38_ENST00000623647|processed_transcript	-2.69901	3.20808	0.00613014	0.038639
Grc38_ENST00000612568|lincRNA	-5.5043	2.79427	0.00614508	0.038639
Grc38_ENST00000629969|lincRNA	1.11001	15.8768	0.00616185	0.038639
Grc38_ENST00000456273|sense_intronic	-5.42759	2.8403	0.00620452	0.0387608
Grc38_ENST00000565181|lincRNA	3.27015	2.81459	0.00640597	0.03987
Grc38_ENST00000514519|lincRNA	1.48078	4.91274	0.00654474	0.0405823
Grc38_ENST00000627173|lincRNA	-2.31496	3.71754	0.00660929	0.0408307
Grc38_ENST00000448958|lincRNA	2.53098	2.61986	0.00669364	0.0411992
Grc38_ENST00000578152|lincRNA	-5.3629	2.69803	0.00674401	0.0413567
Grc38_ENST00000480237|processed_transcript	-5.65037	2.57526	0.00690545	0.042129
Grc38_ENST00000446754|lincRNA	-3.23015	3.30714	0.00692047	0.042129
Grc38_ENST00000430728|lincRNA	-2.46276	3.6087	0.00702254	0.0425949
Grc38_ENST00000553679|lincRNA	-5.67605	2.86911	0.00706721	0.042634
Grc38_ENST00000432438|lincRNA	-5.13343	2.34428	0.00710366	0.042634
Grc38_ENST00000484859|processed_transcript	-3.27958	2.8501	0.00710566	0.042634
Grc38_ENST00000516881|scaRNA	-3.40463	3.26051	0.00713631	0.0426644
Grc38_ENST00000515981|scaRNA	-2.06819	4.15298	0.0074671	0.0444826
Grc38_ENST00000562284|sense_overlapping	-5.256	2.45845	0.00766233	0.0454831
Grc38_ENST00000622602|lincRNA	2.73863	2.66751	0.00784063	0.0462707
Grc38_ENST00000606343|lincRNA	-5.36577	2.66337	0.00789035	0.0462707
Grc38_ENST00000609937|lincRNA	-5.9756	2.87375	0.00791981	0.0462707
Grc38_ENST00000577684|lincRNA	5.02072	1.93867	0.00793371	0.0462707
Grc38_ENST00000502162|lincRNA	3.54086	1.97067	0.00793371	0.0462707
Grc38_ENST00000503882|lincRNA	-5.37652	2.93151	0.00802772	0.0466559
Grc38_ENST00000554926|lincRNA	-5.36036	2.49675	0.00813555	0.0471184
Grc38_ENST00000429464|lincRNA	-5.46007	2.73495	0.00827154	0.0477402
Grc38_ENST00000547717|processed_transcript	1.57109	4.56859	0.00858036	0.0493519
Grc38_ENST00000609737|processed_transcript	-1.86318	4.72786	0.00871036	0.0499275

## Sheet: sncRNAs_diff
NAME	logFC	logCPM	PValue	FDR
Grc38_ENST00000401347|miRNA	-12.3731	7.07	1.15e-07	7.36e-07
piRNA|DQ582243	-10.9215	5.69104	3.71e-07	2.17e-06
Grc38_ENST00000364569|snRNA	-10.4344	5.92045	7.58e-23	2.78e-21
Grc38_ENST00000364849|snoRNA	-10.3082	5.89144	2.88e-25	1.24e-23
Grc38_ENST00000362188|miRNA	-10.2492	5.54458	5.61e-06	2.74e-05
Grc38_ENST00000580664|miRNA	-10.1897	5.04961	5.41e-09	4.07e-08
Grc38_ENST00000459342|snoRNA	-10.1431	5.81636	1.06e-20	2.86e-19
Grc38_ENST00000365607|snoRNA	-9.88763	7.44683	1.27e-30	1.07e-28
Grc38_ENST00000583110|miRNA	-9.85251	4.66952	1.3e-06	7.1e-06
Grc38_ENST00000614031|miRNA	-9.79454	4.62503	1.32e-06	7.22e-06
Grc38_ENST00000459159|snoRNA	-9.76385	5.30573	1.74e-20	4.56e-19
Grc38_ENST00000516387|miRNA	-9.52663	4.37986	7.34e-07	4.17e-06
Grc38_ENST00000363389|snoRNA	-9.48308	4.94223	3.3e-15	4.97e-14
Grc38_ENST00000626830|miRNA	-9.32733	4.72676	5.39e-16	8.79e-15
Grc38_ENST00000626759|miRNA	-9.3187	4.16318	9.13e-07	5.14e-06
Grc38_ENST00000390194|miRNA	-9.29367	4.48452	6.45e-05	0.000255104
Grc38_ENST00000630692|miRNA	-9.09389	4.19782	3.64e-05	0.000149658
Grc38_ENST00000629107|miRNA	-8.97336	4.35045	0.000133556	0.000488967
piRNA|DQ572175	-8.90155	3.81435	1.46e-06	7.86e-06
Grc38_ENST00000413522|snoRNA	-8.83856	4.28655	6.28e-15	9.37e-14
Grc38_ENST00000362803|snoRNA	-8.74652	4.60874	2.43e-14	3.36e-13
Grc38_ENST00000577381|miRNA	-8.67862	3.91192	0.000163228	0.000583052
Grc38_ENST00000606577|snoRNA	-8.66473	4.2768	1.14e-13	1.44e-12
Grc38_ENST00000627128|miRNA	-8.60248	3.81602	2.16e-05	9.3e-05
Grc38_ENST00000384706|snoRNA	-8.52549	6.24421	2.79e-24	1.09e-22
Grc38_ENST00000384215|snoRNA	-8.47362	7.52401	2.51e-28	1.52e-26
Grc38_ENST00000459491|snRNA	-8.45803	3.37738	3.62e-06	1.85e-05
Grc38_ENST00000384339|snoRNA	-8.45391	4.03583	9.37e-14	1.2e-12
Grc38_ENST00000627983|snoRNA	-8.41089	3.93015	6.79e-14	8.92e-13
piRNA|DQ580509	-8.37818	3.41544	9.41e-06	4.37e-05
Grc38_ENST00000410818|snRNA	-8.33959	6.16553	1.02e-22	3.56e-21
Grc38_ENST00000384027|snoRNA	-8.33623	4.12794	1.05e-11	1.09e-10
Grc38_ENST00000363315|snoRNA	-8.279	3.92387	9.1e-11	8.39e-10
Grc38_ENST00000363572|snoRNA	-8.26645	3.80808	0.00044605	0.00137324
Grc38_ENST00000391232|snoRNA	-8.25469	3.96276	1.25e-11	1.27e-10
Grc38_ENST00000384437|snoRNA	-8.24117	4.128	1.37e-12	1.49e-11
Grc38_ENST00000362507|snRNA	-8.2265	4.30641	4.17e-07	2.42e-06
Grc38_ENST00000585165|miRNA	-8.13327	3.21789	9.84e-07	5.52e-06
Grc38_ENST00000364617|snoRNA	-8.06693	3.81051	1.84e-10	1.6e-09
Grc38_ENST00000364259|snoRNA	-8.04009	3.84639	2.03e-08	1.44e-07
Grc38_ENST00000584820|miRNA	-8.02631	3.07426	6.31e-06	3.06e-05
Grc38_ENST00000384176|snoRNA	-7.99647	3.70271	1.24e-10	1.11e-09
Grc38_ENST00000459623|snoRNA	-7.99417	3.63264	1.44e-10	1.27e-09
Grc38_ENST00000363753|snoRNA	-7.97315	6.59649	2.75e-26	1.31e-24
Grc38_ENST00000606412|snoRNA	-7.9541	3.75645	1.72e-09	1.34e-08
Grc38_ENST00000411132|snRNA	-7.94426	3.27508	0.000250337	0.000838104
piRNA|DQ601938	-7.93001	3.28337	0.00024598	0.00082983
Grc38_ENST00000384505|snRNA	-7.91582	3.56602	0.000706542	0.00205317
Grc38_ENST00000583472|miRNA	-7.91345	2.95911	8.24e-06	3.91e-05
Grc38_ENST00000516221|snRNA	-7.90738	3.37439	0.00010243	0.000385427
piRNA|DQ587619	-7.88314	3.26229	0.000305654	0.00100048
piRNA|DQ571367	-7.8132	3.17268	0.000319045	0.00103614
Grc38_ENST00000459191|snRNA	-7.81224	3.09434	2.84e-05	0.000119759
Grc38_ENST00000364139|snoRNA	-7.79837	5.58036	7.88e-21	2.2e-19
Grc38_ENST00000607313|snoRNA	-7.74416	5.53843	2.07e-19	4.86e-18
piRNA|DQ588628	-7.73819	3.09425	0.000245514	0.00082983
Grc38_ENST00000363091|snoRNA	-7.71082	4.10082	2.76e-09	2.12e-08
Grc38_ENST00000517238|snoRNA	-7.66524	3.10361	4.11e-06	2.08e-05
Grc38_ENST00000579227|miRNA	-7.66368	3.41237	0.00320864	0.00772971
Grc38_ENST00000383885|snoRNA	-7.65892	3.48272	3.3e-10	2.8e-09
Grc38_ENST00000621916|miRNA	-7.64984	3.01313	0.000230321	0.000786556
Grc38_ENST00000626886|snoRNA	-7.64111	3.5697	3.26e-09	2.49e-08
Grc38_ENST00000364773|snoRNA	-7.63645	3.30178	2.47e-09	1.92e-08
Grc38_ENST00000362700|snRNA	-7.62717	3.03411	0.0003793	0.00119919
Grc38_ENST00000630429|snoRNA	-7.61712	3.59181	4.92e-09	3.72e-08
Grc38_ENST00000386307|snoRNA	-7.61584	6.3515	6.94e-25	2.78e-23
Grc38_ENST00000365400|snoRNA	-7.59136	3.40508	1.9e-08	1.36e-07
Grc38_ENST00000411041|snRNA	-7.59094	3.02385	0.000229825	0.000786556
Grc38_ENST00000363515|snoRNA	-7.57048	3.04373	0.000531169	0.00160169
Grc38_ENST00000458892|snoRNA	-7.53162	3.45457	7.28e-10	5.96e-09
Grc38_ENST00000516479|snRNA	-7.52757	2.98883	0.000440166	0.00136227
Grc38_ENST00000385221|miRNA	-7.52735	2.99193	0.000189326	0.000661514
Grc38_ENST00000384360|snoRNA	-7.52118	5.1107	9.04e-18	1.73e-16
piRNA|DQ598921	-7.49908	3.11433	0.000961278	0.00267005
Grc38_ENST00000391162|snoRNA	-7.49879	3.2233	3.7e-07	2.17e-06
piRNA|DQ571511	-7.4843	3.24321	1.57e-08	1.13e-07
piRNA|DQ598646	-7.45014	5.54516	7.88e-20	2.01e-18
Grc38_ENST00000390781|miRNA	-7.43222	2.90042	0.000486421	0.00148455
Grc38_ENST00000390806|miRNA	-7.40072	2.59897	0.000450727	0.00138522
Grc38_ENST00000364877|snRNA	-7.39882	2.5553	0.000148049	0.000536448
Grc38_ENST00000411343|miRNA	-7.39799	2.57173	0.000353567	0.00113206
Grc38_ENST00000628661|miRNA	-7.38313	2.92667	0.000703543	0.00204783
piRNA|DQ592265	-7.38311	2.95088	0.000770452	0.00219897
Grc38_ENST00000582434|miRNA	-7.37568	2.59999	0.000119627	0.000441643
Grc38_ENST00000384756|snoRNA	-7.36714	7.14936	3.54e-29	2.49e-27
Grc38_ENST00000391007|snoRNA	-7.34659	3.28719	1.69e-07	1.05e-06
Grc38_ENST00000363202|snoRNA	-7.34594	3.14596	6.51e-08	4.32e-07
Grc38_ENST00000458974|snoRNA	-7.3423	3.34611	1.29e-06	7.08e-06
piRNA|DQ598806	-7.29342	2.65885	0.000116415	0.000431594
Grc38_ENST00000458838|snoRNA	-7.29028	3.41147	2.83e-07	1.69e-06
Grc38_ENST00000516327|snoRNA	-7.28465	3.15267	7.37e-07	4.17e-06
piRNA|DQ580639	-7.2542	2.50836	3.32e-05	0.000137087
Grc38_ENST00000517189|snRNA	-7.24555	2.75383	0.000627434	0.00186012
Grc38_ENST00000458922|snoRNA	-7.23719	2.74042	0.000291158	0.000960484
Grc38_ENST00000458806|snoRNA	-7.23129	2.51678	0.000900888	0.00252003
Grc38_ENST00000384574|snoRNA	-7.21029	5.24314	2.37e-19	5.49e-18
Grc38_ENST00000410433|snoRNA	-7.2044	6.50787	6.24e-27	3.14e-25
Grc38_ENST00000459584|snoRNA	-7.18638	3.09662	1.99e-07	1.22e-06
Grc38_ENST00000364294|snRNA	-7.17557	5.81942	1.61e-20	4.29e-19
Grc38_ENST00000579890|miRNA	-7.1531	2.60586	0.000333314	0.00107503
Grc38_ENST00000583098|miRNA	-7.1323	2.59764	0.00128787	0.00347844
Grc38_ENST00000629282|miRNA	-7.11669	2.7324	0.000923776	0.00257808
Grc38_ENST00000362412|snoRNA	-7.10356	2.89908	1.56e-07	9.75e-07
Grc38_ENST00000459083|snoRNA	-7.07846	3.05545	1.38e-06	7.5e-06
Grc38_ENST00000408314|snoRNA	-7.04062	2.82334	3.22e-07	1.9e-06
piRNA|DQ569993	-7.03091	8.51947	3.88e-22	1.26e-20
Grc38_ENST00000516922|miRNA	-7.01909	2.47595	0.000120503	0.000443946
Grc38_ENST00000408376|snoRNA	-6.99893	3.15992	8.74e-07	4.93e-06
Grc38_ENST00000620577|miRNA	-6.98946	2.56917	9.74e-05	0.000368794
Grc38_ENST00000383870|snoRNA	-6.96857	2.84354	5.47e-07	3.11e-06
Grc38_ENST00000384996|miRNA	-6.9408	2.61167	0.00148612	0.00391775
piRNA|DQ590448	-6.93932	2.26466	0.000750882	0.00215642
Grc38_ENST00000363664|snoRNA	-6.93914	2.85394	4.33e-06	2.17e-05
Grc38_ENST00000363299|snRNA	-6.93715	3.07771	0.000211561	0.000730508
Grc38_ENST00000386062|snoRNA	-6.93352	5.77732	2.78e-22	9.4e-21
piRNA|DQ584149	-6.92094	2.39549	7.51e-05	0.000291227
Grc38_ENST00000384136|snRNA	-6.91653	6.52706	1.6e-18	3.53e-17
Grc38_ENST00000577845|miRNA	-6.90268	2.54301	0.000899964	0.00252003
Grc38_ENST00000584899|miRNA	-6.89231	2.48424	0.000344707	0.0011057
piRNA|DQ573178	-6.89168	2.30683	0.00159945	0.00419766
Grc38_ENST00000364310|snRNA	-6.8798	2.80222	4.27e-05	0.000172933
Grc38_ENST00000610762|miRNA	-6.85886	2.52166	0.000611712	0.00181657
Grc38_ENST00000607707|snoRNA	-6.84377	3.11125	7.31e-06	3.49e-05
Grc38_ENST00000383904|snRNA	-6.8022	2.25115	0.000441019	0.00136251
Grc38_ENST00000411232|miRNA	-6.79655	2.47794	0.00140837	0.0037521
piRNA|DQ584318	-6.79002	2.45125	0.00130215	0.0035009
Grc38_ENST00000411053|snRNA	-6.78855	2.90674	2.38e-05	0.000101865
Grc38_ENST00000621753|snRNA	-6.78045	2.82481	0.000463361	0.00142157
Grc38_ENST00000410413|snoRNA	-6.77151	3.14431	2.73e-06	1.42e-05
Grc38_ENST00000365028|snoRNA	-6.76789	2.7376	1.06e-05	4.84e-05
piRNA|DQ587514	-6.7583	8.78244	2.54e-23	9.53e-22
Grc38_ENST00000577494|miRNA	-6.75152	2.48786	0.001955	0.00498227
piRNA|DQ578315	-6.73788	2.12699	0.000178159	0.000625244
Grc38_ENST00000386157|snoRNA	-6.72385	2.69775	1e-05	4.63e-05
Grc38_ENST00000516146|snRNA	-6.7145	2.93028	7.43e-06	3.54e-05
Grc38_ENST00000391040|snoRNA	-6.69713	2.53403	0.000248129	0.000832533
Grc38_ENST00000364370|snoRNA	-6.69371	4.77793	2.78e-13	3.34e-12
Grc38_ENST00000411292|snoRNA	-6.64458	4.67215	6.64e-14	8.79e-13
Grc38_ENST00000408373|snoRNA	-6.62319	4.65522	1.39e-13	1.73e-12
Grc38_ENST00000516160|miRNA	-6.6222	2.23986	0.00042207	0.00131551
Grc38_ENST00000384084|snoRNA	-6.61476	2.52717	9.35e-06	4.36e-05
Grc38_ENST00000363536|snoRNA	-6.61439	4.53604	1.73e-13	2.1e-12
Grc38_ENST00000401235|miRNA	-6.59472	2.2477	0.00031949	0.00103614
Grc38_ENST00000383886|snRNA	-6.58757	2.53234	1.41e-05	6.32e-05
Grc38_ENST00000384765|snoRNA	-6.58146	5.01192	9.69e-17	1.72e-15
Grc38_ENST00000385242|miRNA	-6.55958	2.36376	0.00212669	0.00535015
Grc38_ENST00000629173|miRNA	-6.55684	2.20704	4.72e-05	0.000190102
Grc38_ENST00000408813|snoRNA	-6.54667	5.29485	1.57e-16	2.74e-15
Grc38_ENST00000408564|snoRNA	-6.54585	2.58907	7.12e-06	3.41e-05
Grc38_ENST00000584302|snoRNA	-6.51971	2.54312	3.87e-05	0.000157712
Grc38_ENST00000583032|snoRNA	-6.5039	6.12062	4.67e-21	1.35e-19
piRNA|DQ585435	-6.49924	2.15913	0.000237026	0.000802698
Grc38_ENST00000408061|snoRNA	-6.49671	2.7156	0.000104761	0.000393358
Grc38_ENST00000408189|snoRNA	-6.47654	5.16946	1.63e-18	3.55e-17
Grc38_ENST00000391076|snoRNA	-6.46648	2.60831	3.73e-05	0.000152969
piRNA|DQ600890	-6.46431	2.25353	0.00210225	0.00529622
Grc38_ENST00000363548|snoRNA	-6.45623	2.31312	7.19e-05	0.000280917
Grc38_ENST00000459475|snoRNA	-6.4402	2.67032	1.26e-05	5.66e-05
Grc38_ENST00000384252|snoRNA	-6.42268	7.78094	8.22e-27	4.02e-25
Grc38_ENST00000408749|snRNA	-6.41789	2.61295	4.47e-05	0.000180614
Grc38_ENST00000458893|snoRNA	-6.41217	5.2124	1.88e-16	3.24e-15
Grc38_ENST00000516145|snRNA	-6.40834	2.37163	0.00120313	0.00327975
Grc38_ENST00000617852|miRNA	-6.39376	2.33801	0.00383041	0.00898335
Grc38_ENST00000584949|snoRNA	-6.39248	5.12211	1.89e-18	4.02e-17
Grc38_ENST00000364802|snoRNA	-6.38511	2.8155	8.15e-05	0.000312677
Grc38_ENST00000365172|snoRNA	-6.38335	4.61922	3.6e-13	4.17e-12
Grc38_ENST00000410557|snoRNA	-6.38172	2.66323	3.96e-05	0.000160873
Grc38_ENST00000628672|miRNA	-6.34733	4.79771	4.34e-13	4.89e-12
Grc38_ENST00000384220|snoRNA	-6.32429	2.83799	0.000109824	0.000409528
Grc38_ENST00000365430|snRNA	-6.30686	2.42455	0.000111964	0.000415969
Grc38_ENST00000516068|snRNA	-6.28885	2.28545	0.000413133	0.00129218
Grc38_ENST00000459386|snoRNA	-6.28322	2.56085	3.74e-05	0.000152969
Grc38_ENST00000364687|snoRNA	-6.28275	2.33654	5.71e-05	0.000227364
Grc38_ENST00000390842|snoRNA	-6.27826	2.83796	5.96e-05	0.000236862
Grc38_ENST00000386847|snoRNA	-6.27571	4.2607	4e-13	4.57e-12
Grc38_ENST00000384229|snoRNA	-6.27207	5.59007	1.27e-17	2.41e-16
Grc38_ENST00000363064|snoRNA	-6.26857	7.24549	3.02e-22	1e-20
Grc38_ENST00000362310|miRNA	-6.26095	2.48287	0.000136909	0.000500202
Grc38_ENST00000629284|miRNA	-6.25907	1.92065	0.000137417	0.000501017
Grc38_ENST00000391286|snoRNA	-6.23421	4.16195	5.51e-12	5.78e-11
Grc38_ENST00000391150|snoRNA	-6.2295	4.96849	8.02e-14	1.04e-12
Grc38_ENST00000625314|snoRNA	-6.19105	2.49724	0.000213952	0.000737319
Grc38_ENST00000383903|snoRNA	-6.18647	7.15282	1.26e-30	1.07e-28
Grc38_ENST00000459579|snoRNA	-6.17764	8.60134	1.56e-29	1.25e-27
Grc38_ENST00000384723|snRNA	-6.17143	2.44689	0.000360529	0.00114809
piRNA|DQ582536	-6.15558	4.39505	3.03e-11	2.96e-10
Grc38_ENST00000385280|miRNA	-6.15444	2.4253	0.000167165	0.00059231
Grc38_ENST00000365633|snoRNA	-6.14879	5.72521	1.29e-17	2.41e-16
Grc38_ENST00000610307|miRNA	-6.14867	1.75103	0.00548115	0.0124225
Grc38_ENST00000391002|snoRNA	-6.12409	4.06295	1.99e-12	2.12e-11
Grc38_ENST00000364071|snRNA	-6.12322	1.86615	0.00793334	0.0169959
Grc38_ENST00000363660|snoRNA	-6.11486	2.55042	0.000178189	0.000625244
Grc38_ENST00000362159|miRNA	-6.10693	2.53431	7.47e-05	0.00029102
Grc38_ENST00000411013|miRNA	-6.09998	2.02154	0.00228304	0.00571896
Grc38_ENST00000384174|snoRNA	-6.09668	2.24561	0.000260576	0.000869079
Grc38_ENST00000630292|miRNA	-6.08811	1.94534	0.000335969	0.00108161
Grc38_ENST00000364514|snoRNA	-6.0835	1.86743	0.00112997	0.00308987
Grc38_ENST00000362883|snoRNA	-6.08097	5.98948	2.38e-16	4.06e-15
Grc38_ENST00000606349|miRNA	-6.07904	2.42211	0.000678481	0.00198803
Grc38_ENST00000384147|snoRNA	-6.06722	7.18725	3.82e-16	6.35e-15
Grc38_ENST00000365153|snoRNA	-6.06173	5.94873	9.11e-16	1.46e-14
Grc38_ENST00000390861|snoRNA	-6.04381	2.53032	0.000173505	0.000613538
Grc38_ENST00000384662|snoRNA	-6.02588	2.51883	0.000221796	0.00076137
Grc38_ENST00000628458|snoRNA	-6.01151	4.01604	1.52e-09	1.2e-08
Grc38_ENST00000408247|miRNA	-6.0106	1.90635	0.00207958	0.00524661
Grc38_ENST00000459004|snoRNA	-5.99761	2.34839	0.000524078	0.00158574
Grc38_ENST00000630515|miRNA	-5.99739	2.36248	0.000211455	0.000730508
Grc38_ENST00000365012|snoRNA	-5.99106	2.20693	0.000426378	0.00132192
snoRNADB_U104	-5.9732	6.25757	8.03e-20	2.02e-18
Grc38_ENST00000386967|snoRNA	-5.97262	5.48602	2.02e-19	4.81e-18
Grc38_ENST00000384423|snoRNA	-5.95254	2.33145	0.000395067	0.00124013
Grc38_ENST00000607441|miRNA	-5.94303	2.29594	0.000542341	0.00162702
piRNA|DQ579858	-5.93602	1.82556	0.00383106	0.00898335
snoRNADB_HBII-135	-5.93053	5.55884	2.15e-18	4.39e-17
Grc38_ENST00000384304|snoRNA	-5.91762	6.84596	5.47e-21	1.55e-19
Grc38_ENST00000391079|snoRNA	-5.9065	5.49979	1.29e-19	3.21e-18
Grc38_ENST00000363836|snoRNA	-5.88838	2.35312	0.000409663	0.00128366
Grc38_ENST00000516405|snRNA	-5.88615	1.9059	0.000855481	0.00241814
Grc38_ENST00000612070|miRNA	-5.88007	1.71355	0.00731194	0.0158967
Grc38_ENST00000630372|miRNA	-5.87599	4.10431	0.000301593	0.00099087
Grc38_ENST00000384096|snoRNA	-5.8481	3.87839	2.73e-10	2.33e-09
Grc38_ENST00000384583|snoRNA	-5.84363	2.31358	0.000549081	0.00164165
Grc38_ENST00000384436|snoRNA	-5.83144	2.05373	0.000336766	0.0010822
Grc38_ENST00000365423|snoRNA	-5.8108	5.5947	5.77e-13	6.47e-12
Grc38_ENST00000383875|snoRNA	-5.80168	6.54537	1.72e-21	5.32e-20
Grc38_ENST00000363217|snoRNA	-5.79504	5.5052	3.9e-18	7.72e-17
Grc38_ENST00000625525|miRNA	-5.7928	1.80702	0.00379866	0.00893115
snoRNADB_E3	-5.7537	4.67095	2.34e-14	3.27e-13
Grc38_ENST00000384714|snoRNA	-5.7226	6.00927	1.31e-21	4.19e-20
Grc38_ENST00000384979|miRNA	-5.70896	2.0485	0.00727107	0.0158274
Grc38_ENST00000362723|snoRNA	-5.69569	4.40148	1.21e-10	1.1e-09
Grc38_ENST00000362698|snRNA	-5.68232	9.6135	9.71e-23	3.49e-21
Grc38_ENST00000384276|snRNA	-5.66943	1.90753	0.00592917	0.0132841
Grc38_ENST00000364931|snRNA	-5.65977	4.04557	3.1e-07	1.85e-06
Grc38_ENST00000583619|snoRNA	-5.62998	5.65158	3.8e-18	7.7e-17
Grc38_ENST00000365128|snoRNA	-5.56378	3.57358	8.06e-10	6.57e-09
piRNA|DQ598942	-5.53268	1.54684	0.0127615	0.0257221
Grc38_ENST00000516827|snRNA	-5.53004	1.92096	0.00274035	0.00671177
Grc38_ENST00000579622|miRNA	-5.52832	3.06354	0.000233059	0.000792309
Grc38_ENST00000384693|snoRNA	-5.50834	7.09503	1.7e-21	5.32e-20
Grc38_ENST00000629784|miRNA	-5.50126	2.20533	0.000508981	0.00154537
Grc38_ENST00000578452|miRNA	-5.49307	5.83697	2.75e-06	1.43e-05
Grc38_ENST00000365372|snRNA	-5.45231	3.28829	0.00279741	0.00680419
Grc38_ENST00000401335|miRNA	-5.44443	3.67719	0.000360098	0.00114809
snoRNADB_HBII-202	-5.42967	5.69243	2.02e-15	3.18e-14
Grc38_ENST00000365199|snRNA	-5.4154	1.7345	0.0016748	0.00437422
Grc38_ENST00000384048|snoRNA	-5.41296	4.50251	6.23e-12	6.49e-11
Grc38_ENST00000363286|snRNA	-5.40305	10.0467	3.31e-16	5.6e-15
Grc38_ENST00000428514|snoRNA	-5.38046	4.01105	1.47e-06	7.89e-06
Grc38_ENST00000630688|snRNA	-5.3625	3.75363	0.000317262	0.00103271
snoRNADB_U17b	-5.32322	5.59261	4.68e-14	6.3e-13
Grc38_ENST00000363626|snoRNA	-5.32187	4.50246	5.66e-10	4.68e-09
Grc38_ENST00000364043|snoRNA	-5.29583	6.1166	5.8e-18	1.12e-16
Grc38_ENST00000384606|snRNA	-5.28554	3.41729	9.32e-06	4.36e-05
Grc38_ENST00000364953|snoRNA	-5.25796	5.17205	4.73e-11	4.55e-10
Grc38_ENST00000363214|snoRNA	-5.21536	5.72659	3.82e-14	5.17e-13
Grc38_ENST00000362477|snRNA	-5.15784	8.97852	2.72e-15	4.16e-14
Grc38_ENST00000384390|snoRNA	-5.13856	5.86539	1.18e-07	7.51e-07
Grc38_ENST00000383953|snoRNA	-5.10999	6.89131	9.71e-21	2.67e-19
Grc38_ENST00000626963|snoRNA	-5.0906	4.85173	8.77e-11	8.17e-10
Grc38_ENST00000384769|snoRNA	-5.0679	6.02262	2.33e-17	4.23e-16
Grc38_ENST00000362805|snoRNA	-5.05754	3.32141	1.44e-06	7.8e-06
Grc38_ENST00000615356|snRNA	-5.03433	4.11455	1.33e-07	8.44e-07
Grc38_ENST00000577887|snoRNA	-5.02544	3.48346	1.09e-06	6.07e-06
Grc38_ENST00000363981|snoRNA	-5.00641	7.02007	9.97e-14	1.26e-12
Grc38_ENST00000459299|snoRNA	-4.99102	5.19257	1.21e-12	1.33e-11
Grc38_ENST00000384401|snoRNA	-4.98414	3.27047	2.36e-06	1.24e-05
Grc38_ENST00000459585|miRNA	-4.98061	5.10593	4.57e-08	3.1e-07
Grc38_ENST00000579017|miRNA	-4.97585	4.18105	2.52e-05	0.000107307
Grc38_ENST00000365382|snoRNA	-4.96643	6.80118	2.92e-19	6.67e-18
Grc38_ENST00000365668|snRNA	-4.92235	7.09486	1.42e-18	3.17e-17
Grc38_ENST00000363925|snRNA	-4.91946	6.62697	2e-18	4.15e-17
Grc38_ENST00000365223|snoRNA	-4.89297	5.58259	3.08e-13	3.64e-12
Grc38_ENST00000459124|snoRNA	-4.86119	4.57082	7.39e-11	6.98e-10
Grc38_ENST00000384365|snoRNA	-4.86069	2.88884	2.2e-06	1.16e-05
Grc38_ENST00000385278|miRNA	-4.8484	3.11625	0.000329772	0.00106556
Grc38_ENST00000606769|snoRNA	-4.81665	3.91783	2e-08	1.43e-07
Grc38_ENST00000365574|snRNA	-4.80282	4.33644	5.79e-08	3.86e-07
Grc38_ENST00000364938|snoRNA	-4.78215	5.20077	3.56e-13	4.16e-12
Grc38_ENST00000459187|snoRNA	-4.77921	4.93971	3.62e-13	4.17e-12
Grc38_ENST00000384342|snoRNA	-4.76502	4.14342	7.11e-10	5.85e-09
Grc38_ENST00000384967|miRNA	-4.76182	8.34069	1.64e-13	2.01e-12
Grc38_ENST00000628177|snoRNA	-4.75911	4.11089	3.52e-10	2.98e-09
Grc38_ENST00000364009|snoRNA	-4.75162	4.86244	4.37e-11	4.22e-10
Grc38_ENST00000386745|snoRNA	-4.74343	5.98626	3.22e-13	3.77e-12
Grc38_ENST00000384452|snoRNA	-4.74128	3.63424	3.12e-08	2.17e-07
Grc38_ENST00000584045|miRNA	-4.73521	4.02242	0.000365108	0.00115848
Grc38_ENST00000458770|snoRNA	-4.71127	4.55925	1.99e-11	1.98e-10
Grc38_ENST00000384214|snoRNA	-4.70774	3.70625	2.67e-08	1.87e-07
Grc38_ENST00000517277|snRNA	-4.68146	2.89592	0.000291254	0.000960484
Grc38_ENST00000629038|snoRNA	-4.68143	3.32465	1.26e-05	5.66e-05
Grc38_ENST00000383860|snRNA	-4.67364	3.02171	8.54e-06	4.03e-05
Grc38_ENST00000363543|snoRNA	-4.64119	3.95762	2.3e-07	1.41e-06
Grc38_ENST00000385245|miRNA	-4.64008	7.67081	8.81e-15	1.29e-13
Grc38_ENST00000362307|miRNA	-4.63454	7.0727	3.67e-16	6.15e-15
Grc38_ENST00000362704|snoRNA	-4.61706	3.87522	7.13e-08	4.66e-07
Grc38_ENST00000386747|snoRNA	-4.61053	5.22381	3.08e-11	2.99e-10
Grc38_ENST00000459155|snoRNA	-4.59897	2.81768	4.24e-05	0.000171848
Grc38_ENST00000363345|snoRNA	-4.58424	4.49585	3.67e-10	3.09e-09
Grc38_ENST00000629536|snoRNA	-4.52669	3.71139	6.8e-08	4.47e-07
Grc38_ENST00000364969|snoRNA	-4.50834	4.68045	3.02e-11	2.96e-10
Grc38_ENST00000622286|snRNA	-4.49055	2.92524	0.0014605	0.00386759
Grc38_ENST00000363485|snoRNA	-4.48717	2.79059	1.64e-05	7.27e-05
Grc38_ENST00000459163|snoRNA	-4.47796	5.84508	1.2e-09	9.63e-09
Grc38_ENST00000408612|snoRNA	-4.47772	6.00894	1.44e-16	2.54e-15
Grc38_ENST00000584275|snoRNA	-4.47634	3.59667	5.6e-08	3.75e-07
Grc38_ENST00000365659|snoRNA	-4.43096	2.88885	1.68e-05	7.44e-05
Grc38_ENST00000401312|miRNA	-4.41115	3.93313	0.00442084	0.0102167
Grc38_ENST00000629478|snRNA	-4.41092	3.25288	7.51e-05	0.000291227
Grc38_ENST00000629259|miRNA	-4.40867	5.70298	6.99e-13	7.79e-12
Grc38_ENST00000363742|snoRNA	-4.40833	2.62239	1.67e-05	7.4e-05
Grc38_ENST00000516564|snRNA	-4.39647	3.39198	0.000473038	0.00144622
Grc38_ENST00000581525|snoRNA	-4.37172	5.76883	2.42e-15	3.77e-14
Grc38_ENST00000364578|snoRNA	-4.35713	4.0166	4.13e-08	2.81e-07
Grc38_ENST00000408136|miRNA	-4.3556	3.12488	0.000510017	0.00154585
Grc38_ENST00000362705|snoRNA	-4.33386	4.99929	1.16e-11	1.19e-10
Grc38_ENST00000410506|snRNA	-4.32703	3.89831	0.000382977	0.00120864
Grc38_ENST00000384262|snoRNA	-4.32261	5.16439	1.72e-10	1.5e-09
Grc38_ENST00000391208|snRNA	-4.32179	2.67554	0.00183446	0.00472294
Grc38_ENST00000384033|snoRNA	-4.30734	3.33381	1.74e-05	7.68e-05
Grc38_ENST00000580972|snRNA	-4.27863	3.39433	1.06e-06	5.91e-06
Grc38_ENST00000384584|snoRNA	-4.27247	2.82225	0.000106639	0.000399556
Grc38_ENST00000620232|snoRNA	-4.26582	5.20058	6.25e-14	8.34e-13
Grc38_ENST00000516086|snRNA	-4.26536	2.53065	0.0267976	0.0474277
Grc38_ENST00000517242|snoRNA	-4.26308	3.98841	2.92e-07	1.74e-06
Grc38_ENST00000582922|miRNA	-4.25171	2.22014	0.00376634	0.00887887
Grc38_ENST00000362165|miRNA	-4.23595	8.37493	1.3e-14	1.9e-13
Grc38_ENST00000384762|snoRNA	-4.20508	2.69588	0.00119925	0.00327423
Grc38_ENST00000385130|miRNA	-4.20068	4.96298	7.73e-09	5.75e-08
Grc38_ENST00000384850|miRNA	-4.18388	3.83116	2.47e-06	1.29e-05
Grc38_ENST00000578212|miRNA	-4.1808	2.81632	0.000271912	0.000903466
Grc38_ENST00000618978|snRNA	-4.17486	4.97285	3.43e-08	2.36e-07
Grc38_ENST00000365530|snoRNA	-4.16859	5.05231	1.47e-09	1.17e-08
Grc38_ENST00000625943|snoRNA	-4.16273	6.01744	1.44e-11	1.45e-10
Grc38_ENST00000459433|snoRNA	-4.15709	3.3171	1.19e-05	5.4e-05
Grc38_ENST00000363610|snoRNA	-4.14959	2.52941	0.000750352	0.00215642
Grc38_ENST00000401190|miRNA	-4.14484	2.45708	8.92e-05	0.00034162
Grc38_ENST00000629629|snoRNA	-4.14155	2.53038	9.18e-05	0.000349113
Grc38_ENST00000364027|snoRNA	-4.1354	2.60026	0.000246892	0.000831314
Grc38_ENST00000630949|snoRNA	-4.12912	4.53501	1.21e-10	1.1e-09
Grc38_ENST00000411266|snRNA	-4.1218	3.38128	0.000531064	0.00160169
Grc38_ENST00000384158|snoRNA	-4.11871	3.89806	2.85e-05	0.000119997
Grc38_ENST00000581217|miRNA	-4.11089	4.08217	1.84e-05	8.02e-05
Grc38_ENST00000583861|snoRNA	-4.10609	5.64655	9.56e-14	1.22e-12
Grc38_ENST00000385045|miRNA	-4.10334	4.17042	1.35e-08	9.84e-08
Grc38_ENST00000515909|snRNA	-4.09449	2.52066	0.0012925	0.00348559
Grc38_ENST00000386037|snoRNA	-4.08076	3.66704	1.46e-07	9.12e-07
Grc38_ENST00000459473|snoRNA	-4.05076	4.00504	5.32e-06	2.61e-05
Grc38_ENST00000363450|snoRNA	-4.04783	4.43996	1.59e-09	1.25e-08
Grc38_ENST00000384674|snoRNA	-3.9869	3.81936	6.63e-06	3.21e-05
Grc38_ENST00000448188|snoRNA	-3.97364	6.18145	1.8e-12	1.93e-11
Grc38_ENST00000384334|snoRNA	-3.96001	2.75611	0.00136745	0.00366526
Grc38_ENST00000401201|miRNA	-3.95419	2.02643	0.00220839	0.00553984
Grc38_ENST00000365444|snoRNA	-3.9451	4.22789	3.33e-08	2.3e-07
Grc38_ENST00000390856|snoRNA	-3.9328	5.19833	1.3e-10	1.16e-09
Grc38_ENST00000516528|snoRNA	-3.92701	2.51445	0.00030774	0.00100544
Grc38_ENST00000385243|miRNA	-3.90782	2.51857	0.000635765	0.00187849
Grc38_ENST00000384711|snoRNA	-3.9028	2.55077	0.000751869	0.00215642
Grc38_ENST00000584923|snoRNA	-3.88604	5.5411	9.97e-13	1.1e-11
Grc38_ENST00000579046|miRNA	-3.86698	2.51051	0.00583697	0.0131108
Grc38_ENST00000516066|snRNA	-3.83549	2.05602	0.014913	0.0292449
Grc38_ENST00000579798|miRNA	-3.81766	2.87424	0.000132451	0.000485931
Grc38_ENST00000385029|miRNA	-3.80917	2.87648	0.000145146	0.000527016
Grc38_ENST00000365493|snoRNA	-3.79969	3.05146	7.68e-05	0.000296484
Grc38_ENST00000365178|snoRNA	-3.76409	2.43039	0.000865128	0.00244149
Grc38_ENST00000384287|snoRNA	-3.75142	2.98481	5.32e-05	0.000212475
Grc38_ENST00000439232|snoRNA	-3.74281	3.31844	3.1e-05	0.000129397
Grc38_ENST00000384512|snoRNA	-3.74154	4.81323	9.39e-10	7.55e-09
Grc38_ENST00000408493|snoRNA	-3.72898	3.11969	0.0012555	0.00340669
Grc38_ENST00000410991|snRNA	-3.7286	4.02956	1.81e-05	7.92e-05
Grc38_ENST00000516061|snRNA	-3.72601	2.32008	0.00194228	0.00496422
Grc38_ENST00000408587|snoRNA	-3.72079	2.41458	0.00437495	0.0101239
Grc38_ENST00000363593|snoRNA	-3.71412	5.48805	7.24e-08	4.72e-07
Grc38_ENST00000410144|snRNA	-3.68798	3.44143	9.22e-05	0.000350026
Grc38_ENST00000365161|snoRNA	-3.6678	4.03297	2.44e-07	1.48e-06
Grc38_ENST00000408790|miRNA	-3.66568	2.58741	0.00108878	0.00298651
Grc38_ENST00000577955|miRNA	-3.66019	1.91025	0.0101995	0.0212227
Grc38_ENST00000625845|snoRNA	-3.65712	5.0775	1.54e-11	1.55e-10
Grc38_ENST00000391100|snoRNA	-3.64774	2.7782	0.000539401	0.00162374
Grc38_ENST00000579879|snoRNA	-3.64549	6.5478	7.16e-14	9.34e-13
Grc38_ENST00000459174|snoRNA	-3.64206	2.94102	7.99e-05	0.000307277
Grc38_ENST00000384356|snoRNA	-3.64048	2.90092	9.16e-05	0.000349113
Grc38_ENST00000385135|miRNA	-3.59638	10.3327	7.79e-15	1.15e-13
Grc38_ENST00000578183|snoRNA	-3.59089	2.62471	0.000305072	0.00100043
Grc38_ENST00000362111|miRNA	-3.58273	9.6947	4.11e-10	3.45e-09
Grc38_ENST00000401325|miRNA	-3.57466	1.96005	0.00759592	0.0163726
Grc38_ENST00000585011|snoRNA	-3.57295	2.22954	0.00327482	0.0078676
Grc38_ENST00000364805|snoRNA	-3.57213	4.57529	3.75e-06	1.91e-05
Grc38_ENST00000517041|snRNA	-3.56781	3.28215	7.96e-05	0.000306815
Grc38_ENST00000630092|snoRNA	-3.55174	4.7114	1.3e-09	1.04e-08
Grc38_ENST00000364977|snoRNA	-3.54068	3.51204	2.72e-05	0.000115167
Grc38_ENST00000385266|miRNA	-3.53059	3.55778	0.000126654	0.000465632
Grc38_ENST00000363738|snoRNA	-3.52074	2.18619	0.00185568	0.00476363
Grc38_ENST00000390930|snoRNA	-3.51094	4.46966	5.37e-06	2.63e-05
Grc38_ENST00000385051|miRNA	-3.50881	2.83596	0.00050011	0.00152369
Grc38_ENST00000362443|snRNA	-3.50664	2.20688	0.00273459	0.00671177
Grc38_ENST00000362114|miRNA	-3.48841	4.19154	5.04e-07	2.88e-06
Grc38_ENST00000619225|snRNA	-3.45896	8.60422	3.27e-14	4.47e-13
Grc38_ENST00000364089|snoRNA	-3.45836	2.86434	0.000425135	0.00132039
Grc38_ENST00000410396|snRNA	-3.41994	8.35398	4.01e-09	3.06e-08
Grc38_ENST00000384416|snoRNA	-3.41439	4.60004	1.1e-07	7.1e-07
Grc38_ENST00000516336|snRNA	-3.38816	3.43216	0.00135617	0.00364058
Grc38_ENST00000391145|snoRNA	-3.38401	3.57298	6.46e-05	0.000255257
Grc38_ENST00000516438|snRNA	-3.38336	3.39861	0.000585154	0.00174064
Grc38_ENST00000390227|miRNA	-3.3787	4.14724	6.04e-06	2.94e-05
Grc38_ENST00000362607|snoRNA	-3.3657	3.89937	1.8e-05	7.92e-05
Grc38_ENST00000628590|snoRNA	-3.35243	4.21755	5.07e-06	2.5e-05
Grc38_ENST00000384388|snRNA	-3.32095	3.11294	0.00041385	0.00129218
Grc38_ENST00000517283|snoRNA	-3.29928	3.16327	0.00042376	0.00131845
Grc38_ENST00000384892|miRNA	-3.2955	2.83276	0.00753904	0.0162899
Grc38_ENST00000390981|snoRNA	-3.28874	3.9662	6.02e-05	0.000238706
Grc38_ENST00000362260|miRNA	-3.2681	3.86737	1.18e-05	5.38e-05
Grc38_ENST00000385019|miRNA	-3.2665	9.31697	5.86e-11	5.6e-10
Grc38_ENST00000401115|miRNA	-3.26509	2.1444	0.023548	0.0424442
Grc38_ENST00000629167|miRNA	-3.25495	2.97439	0.00015298	0.000552179
Grc38_ENST00000516209|snRNA	-3.22293	4.81143	3.79e-06	1.93e-05
Grc38_ENST00000385289|miRNA	-3.21548	9.27336	7.41e-11	6.98e-10
Grc38_ENST00000384832|miRNA	-3.21209	7.03863	2.24e-10	1.94e-09
Grc38_ENST00000362183|miRNA	-3.20867	2.91537	0.00107413	0.00296015
Grc38_ENST00000619178|snoRNA	-3.20857	4.68559	4.01e-08	2.73e-07
Grc38_ENST00000516581|snRNA	-3.20347	3.07415	0.000709085	0.00205716
Grc38_ENST00000625876|snoRNA	-3.19576	5.25971	2.59e-10	2.22e-09
Grc38_ENST00000410482|snRNA	-3.19375	6.01787	2.39e-07	1.46e-06
Grc38_ENST00000391249|snoRNA	-3.18451	2.19307	0.0271082	0.0478812
Grc38_ENST00000408573|snoRNA	-3.17188	5.41324	4.39e-07	2.54e-06
Grc38_ENST00000620446|snoRNA	-3.16937	5.12594	8.6e-11	8.06e-10
Grc38_ENST00000408827|miRNA	-3.16909	4.24158	0.000156026	0.000561884
Grc38_ENST00000390833|snoRNA	-3.15424	3.51594	0.000544233	0.00162992
Grc38_ENST00000390738|miRNA	-3.12911	3.9288	1.9e-05	8.22e-05
Grc38_ENST00000583730|miRNA	-3.10934	3.05111	0.00162205	0.00424433
Grc38_ENST00000581890|miRNA	-3.10209	2.41332	0.00635476	0.0141044
Grc38_ENST00000614083|snRNA	-3.0856	3.30491	0.00296579	0.00717412
Grc38_ENST00000362302|miRNA	-3.08108	3.16957	0.00110526	0.00302701
Grc38_ENST00000577988|snoRNA	-3.04767	5.55917	5.34e-08	3.6e-07
Grc38_ENST00000391239|snRNA	-3.04378	3.14721	0.00349113	0.00834178
Grc38_ENST00000613527|miRNA	-3.03785	6.34802	1.36e-08	9.85e-08
Grc38_ENST00000385024|miRNA	-3.01579	6.65433	1.23e-10	1.11e-09
Grc38_ENST00000582890|miRNA	-3.00969	4.63243	3.5e-06	1.8e-05
Grc38_ENST00000391305|snoRNA	-3.00524	2.69521	0.00237971	0.0059274
Grc38_ENST00000385073|miRNA	-2.99905	8.82371	7.82e-09	5.79e-08
Grc38_ENST00000606623|snRNA	-2.97606	4.42261	0.000109998	0.000409528
Grc38_ENST00000459255|snoRNA	-2.9735	2.38588	0.00984054	0.020581
Grc38_ENST00000410545|snRNA	-2.96551	5.17765	9.35e-06	4.36e-05
Grc38_ENST00000408746|snoRNA	-2.95266	2.04537	0.0116437	0.0237596
Grc38_ENST00000385016|miRNA	-2.94858	3.05019	0.000938079	0.00261209
Grc38_ENST00000364113|snoRNA	-2.94554	4.01307	1.39e-06	7.51e-06
Grc38_ENST00000385288|miRNA	-2.93127	5.26689	2.29e-06	1.2e-05
Grc38_ENST00000385214|miRNA	-2.91634	5.87401	4.41e-07	2.54e-06
mirBASE_tch-miR-27a-3p	-2.90191	8.52681	5.36e-08	3.6e-07
Grc38_ENST00000385012|miRNA	-2.89277	5.5769	2.13e-06	1.13e-05
Grc38_ENST00000384581|snoRNA	-2.86519	3.92169	4.76e-05	0.000191241
Grc38_ENST00000408139|snoRNA	-2.84889	2.22589	0.00540286	0.0122767
Grc38_ENST00000384907|miRNA	-2.83976	4.55533	3.8e-05	0.000155346
Grc38_ENST00000571722|snoRNA	-2.83109	5.10353	2.53e-07	1.53e-06
Grc38_ENST00000390708|miRNA	-2.8193	4.05958	0.00044229	0.00136405
Grc38_ENST00000385129|miRNA	-2.81262	9.80887	3.12e-08	2.17e-07
Grc38_ENST00000384865|miRNA	-2.7991	5.65639	3.15e-05	0.000130826
Grc38_ENST00000365080|snoRNA	-2.77403	2.92219	0.00214263	0.00538255
Grc38_ENST00000385273|miRNA	-2.76735	9.1478	4e-07	2.33e-06
Grc38_ENST00000631292|snoRNA	-2.76426	4.97289	6.62e-08	4.38e-07
Grc38_ENST00000384849|miRNA	-2.75829	8.39749	2.38e-07	1.46e-06
Grc38_ENST00000584213|snoRNA	-2.733	2.28007	0.00366366	0.00867165
Grc38_ENST00000516403|snRNA	-2.727	2.58518	0.0166634	0.0318687
Grc38_ENST00000384792|snoRNA	-2.72592	3.83301	0.000201307	0.000700597
Grc38_ENST00000385274|miRNA	-2.72437	2.73516	0.0100229	0.0208879
Grc38_ENST00000364533|snoRNA	-2.72204	3.82363	0.000178235	0.000625244
Grc38_ENST00000620268|snRNA	-2.70041	7.67969	1.16e-06	6.41e-06
Grc38_ENST00000385227|miRNA	-2.69394	5.89434	7.01e-06	3.36e-05
Grc38_ENST00000385128|miRNA	-2.68249	9.04994	1.05e-05	4.82e-05
Grc38_ENST00000618716|miRNA	-2.65532	2.59546	0.00846683	0.0179856
Grc38_ENST00000505219|snoRNA	-2.62591	2.9752	0.00489609	0.0112266
Grc38_ENST00000613956|snRNA	-2.62436	7.72909	1.45e-06	7.8e-06
Grc38_ENST00000391141|snoRNA	-2.62258	3.13713	0.0066415	0.0145831
Grc38_ENST00000362181|miRNA	-2.61377	5.33439	4.67e-06	2.32e-05
Grc38_ENST00000362224|miRNA	-2.611	6.03391	6.7e-06	3.23e-05
Grc38_ENST00000364432|snoRNA	-2.61097	2.98024	0.00175215	0.00453755
Grc38_ENST00000384831|miRNA	-2.60103	3.78282	0.000109967	0.000409528
Grc38_ENST00000362153|miRNA	-2.59636	5.13812	5.21e-05	0.000208687
Grc38_ENST00000586026|miRNA	-2.57009	2.35394	0.00675098	0.0147683
Grc38_ENST00000411404|snRNA	-2.55201	5.53138	3.28e-05	0.000135958
Grc38_ENST00000362150|miRNA	-2.54587	7.36048	8.92e-06	4.2e-05
Grc38_ENST00000385236|miRNA	-2.49431	9.16834	3.04e-05	0.000127364
Grc38_ENST00000363497|snoRNA	-2.49248	3.2436	0.0102904	0.0213445
Grc38_ENST00000517038|snRNA	-2.48873	3.84367	0.00266594	0.00657523
Grc38_ENST00000411315|snRNA	-2.48155	3.38097	0.000878358	0.00247486
Grc38_ENST00000362280|miRNA	-2.47427	9.28565	6.97e-09	5.2e-08
Grc38_ENST00000384999|miRNA	-2.47199	4.41597	8.44e-06	3.99e-05
Grc38_ENST00000580533|snoRNA	-2.4687	5.11766	1.98e-06	1.05e-05
Grc38_ENST00000591554|miRNA	-2.46813	5.21954	3.02e-05	0.000126426
Grc38_ENST00000384619|snRNA	-2.45589	8.79041	0.00066921	0.00196741
Grc38_ENST00000617320|miRNA	-2.44507	4.54487	0.000162194	0.000580536
Grc38_ENST00000410712|snRNA	-2.43761	3.29851	0.0155718	0.0302004
Grc38_ENST00000385028|miRNA	-2.43579	2.61352	0.00743631	0.0161273
Grc38_ENST00000362761|snoRNA	-2.40091	5.4458	1.16e-06	6.41e-06
Grc38_ENST00000383893|snoRNA	-2.38183	3.80202	0.00148612	0.00391775
Grc38_ENST00000606190|snRNA	-2.36423	5.3563	0.000892589	0.00250694
Grc38_ENST00000362279|miRNA	-2.32798	5.90842	3.28e-06	1.69e-05
Grc38_ENST00000385021|miRNA	-2.29645	3.80454	0.00279067	0.00679719
Grc38_ENST00000362222|miRNA	-2.26309	2.96436	0.00469528	0.0108083
Grc38_ENST00000621667|miRNA	-2.25293	3.69543	0.00174885	0.00453567
Grc38_ENST00000408625|miRNA	-2.22864	2.6381	0.0145679	0.0286638
Grc38_ENST00000385006|miRNA	-2.22816	4.29195	0.000309003	0.00100769
Grc38_ENST00000390225|miRNA	-2.22668	4.03777	0.000712649	0.0020641
Grc38_ENST00000362281|miRNA	-2.19303	3.63052	0.00491122	0.0112466
Grc38_ENST00000384868|miRNA	-2.17242	2.6949	0.0107787	0.0222263
Grc38_ENST00000384816|miRNA	-2.15867	6.9775	3.45e-06	1.78e-05
Grc38_ENST00000384976|miRNA	-2.13887	4.86919	0.000887174	0.00249571
Grc38_ENST00000384988|miRNA	-2.13408	6.46394	9.94e-05	0.000374708
Grc38_ENST00000385301|miRNA	-2.12536	5.21752	0.000835702	0.0023775
Grc38_ENST00000362239|miRNA	-2.10688	7.11435	0.000164531	0.000586515
Grc38_ENST00000362145|miRNA	-2.09856	3.06914	0.0225827	0.0410403
Grc38_ENST00000362252|miRNA	-2.09516	6.47015	6.8e-06	3.27e-05
Grc38_ENST00000385022|miRNA	-2.08638	4.23135	0.00265462	0.00655649
Grc38_ENST00000384320|snoRNA	-2.06728	3.77819	0.0019165	0.0049126
Grc38_ENST00000384993|miRNA	-2.04489	5.70699	0.00425694	0.00987678
Grc38_ENST00000385235|miRNA	-2.02308	3.57294	0.0128594	0.0258214
Grc38_ENST00000582203|miRNA	-2.02128	2.9669	0.00993778	0.0207597
Grc38_ENST00000386683|snoRNA	-1.98864	2.87836	0.0208272	0.0382048
Grc38_ENST00000349529|miRNA	-1.97133	4.63078	0.00206564	0.00521893
Grc38_ENST00000410457|snRNA	-1.97021	3.36678	0.0195433	0.0364187
Grc38_ENST00000385282|miRNA	-1.93364	6.46117	0.000741105	0.00213598
Grc38_ENST00000384852|miRNA	-1.92659	5.0712	0.00501049	0.0114591
Grc38_ENST00000390204|miRNA	-1.92627	2.72437	0.0250961	0.0447763
Grc38_ENST00000622285|snRNA	-1.87801	4.98832	0.00192421	0.0049252
Grc38_ENST00000410135|snRNA	-1.86171	3.52024	0.0121791	0.0246805
Grc38_ENST00000582661|miRNA	-1.85524	3.06477	0.0227625	0.0412395
Grc38_ENST00000362155|miRNA	-1.84892	4.63365	0.00286057	0.00694824
Grc38_ENST00000362262|miRNA	-1.8022	4.14692	0.00104074	0.00287262
Grc38_ENST00000362135|miRNA	-1.76639	6.72356	0.000848005	0.00240823
Grc38_ENST00000384876|miRNA	-1.74134	6.28175	0.000982888	0.00272577
Grc38_ENST00000385270|miRNA	-1.73334	5.40709	0.00018704	0.000654827
Grc38_ENST00000410361|snRNA	-1.6938	5.8884	0.0014575	0.00386545
Grc38_ENST00000385207|miRNA	-1.68062	4.64857	0.00343699	0.00824597
Grc38_ENST00000385271|miRNA	-1.66725	4.24015	0.00345684	0.00827232
Grc38_ENST00000385212|miRNA	-1.65069	7.10178	0.000850311	0.00240823
Grc38_ENST00000605806|snRNA	-1.63253	8.99627	0.0080263	0.0171533
Grc38_ENST00000362102|miRNA	-1.62754	7.74331	0.000469562	0.00143808
Grc38_ENST00000363062|snRNA	-1.62076	2.953	0.0248916	0.0444565
Grc38_ENST00000628908|miRNA	-1.61715	10.7259	0.000256373	0.000856685
Grc38_ENST00000384885|miRNA	-1.6139	8.66082	0.00073405	0.00211912
Grc38_ENST00000621466|miRNA	-1.59392	10.0958	0.00197334	0.00502174
Grc38_ENST00000630110|miRNA	-1.57998	3.96754	0.014782	0.0290202
Grc38_ENST00000390183|miRNA	-1.53108	4.0273	0.0199652	0.0369314
Grc38_ENST00000385020|miRNA	-1.52421	4.66009	0.00695163	0.0151884
Grc38_ENST00000386972|miRNA	-1.51987	8.71515	0.00151529	0.00398274
Grc38_ENST00000385010|miRNA	-1.46526	4.98886	0.0123725	0.0250436
Grc38_ENST00000362205|miRNA	-1.39954	9.61626	0.00127762	0.00345604
mirBASE_efT-miR-26c	-1.37007	9.61246	0.00161523	0.00423277
Grc38_ENST00000385054|miRNA	-1.3369	9.62105	0.00177456	0.00457929
Grc38_ENST00000362117|miRNA	-1.30651	5.00365	0.01833	0.0345483
Grc38_ENST00000385092|miRNA	-1.27157	8.54536	0.015007	0.0293636
Grc38_ENST00000619524|snRNA	-1.25368	6.18944	0.0158804	0.0307311
Grc38_ENST00000365699|miRNA	-1.18672	6.81149	0.0227248	0.0412335
Grc38_ENST00000362202|miRNA	-1.16154	8.70086	0.00419173	0.00975116
Grc38_ENST00000385254|miRNA	-1.1537	6.75526	0.0194477	0.0363011
Grc38_ENST00000385300|miRNA	-1.05393	12.3125	0.0161928	0.0311987
Grc38_ENST00000385277|miRNA	-0.983958	8.69379	0.0176346	0.0334245
Grc38_ENST00000385233|miRNA	-0.967268	7.86146	0.0159092	0.0307531
Grc38_ENST00000362251|miRNA	-0.964261	6.3583	0.0170369	0.0324345
Grc38_ENST00000362309|miRNA	-0.905384	10.8872	0.0167249	0.0319441
piRNA|DQ571823	0.965485	9.48099	0.0211146	0.0386918
piRNA|DQ578783	1.04549	10.5445	0.0111648	0.0228884
Grc38_ENST00000625347|miRNA	1.04807	10.276	0.013011	0.0260367
Grc38_ENST00000362512|snRNA	1.05156	5.00479	0.0164421	0.0316442
Grc38_ENST00000362160|miRNA	1.12357	6.03874	0.0176518	0.0334245
Y_RNA_AC199101.3/202469-202368	1.38031	4.2629	0.00779629	0.0167635
piRNA|DQ570968	1.44428	6.69981	0.00426445	0.00988117
Grc38_ENST00000458896|miRNA	1.45431	4.37905	0.0165251	0.0316656
Y_RNA_AABR05113607.1/617-718	1.48603	8.33458	0.00016083	0.000576825
piRNA|DQ580854	1.48901	10.694	0.000356334	0.00113885
Grc38_ENST00000410695|snRNA	1.50197	4.08994	0.0282543	0.0496071
piRNA|DQ573323	1.51253	4.83201	0.0032356	0.00778402
Y_RNA_AANT01114500.1/1882-1983	1.52186	8.41139	9.16e-05	0.000349113
Grc38_ENST00000385140|miRNA	1.52829	11.2223	0.00124541	0.00338452
Grc38_ENST00000606207|miRNA	1.53008	5.21588	0.01295	0.0259443
piRNA|DQ570940	1.55096	13.7161	9.93e-05	0.000374708
Grc38_ENST00000390751|miRNA	1.57757	6.35812	0.00506916	0.0115782
piRNA|DQ585088	1.61803	4.658	0.0139431	0.0277444
piRNA|DQ596455	1.66721	4.08932	0.000717317	0.00207421
Grc38_ENST00000384446|snRNA	1.68947	5.85282	0.000279206	0.000924215
piRNA|DQ584698	1.72858	9.64137	0.000205681	0.000714407
Grc38_ENST00000383858|snRNA	1.7417	9.72835	0.000322962	0.00104547
piRNA|DQ576604	1.80378	3.13687	0.00614809	0.0137396
piRNA|DQ598445	1.88704	10.1925	6.51e-05	0.000256399
piRNA|DQ598167	1.9245	9.97636	1.24e-05	5.59e-05
Grc38_ENST00000410794|snRNA	1.99109	4.19026	0.000573331	0.00170835
Grc38_ENST00000630786|miRNA	1.99678	4.69365	0.000175485	0.000619295
piRNA|DQ590835	2.02674	7.63256	4.51e-06	2.25e-05
Grc38_ENST00000577323|miRNA	2.04185	2.87974	0.00369589	0.0087362
Grc38_ENST00000516461|miRNA	2.07567	4.74789	0.0026795	0.00659943
piRNA|DQ582838	2.10492	4.22698	0.00177607	0.00457929
Y_RNA_ABDC01212300.1/2415-2498	2.12112	3.11922	0.00275511	0.00673853
piRNA|DQ570344	2.18699	3.69761	0.00203578	0.00515828
piRNA|DQ571550	2.23433	10.2661	1.16e-05	5.3e-05
Grc38_ENST00000578924|miRNA	2.24082	5.56701	2.31e-05	9.92e-05
Grc38_ENST00000384592|snRNA	2.25175	5.72353	0.000369337	0.00116979
piRNA|DQ596538	2.25398	9.64375	4.99e-06	2.47e-05
piRNA|DQ597397	2.25566	10.1543	0.015103	0.0295001
Grc38_ENST00000362142|miRNA	2.26519	2.56846	0.0216039	0.0394653
Grc38_ENST00000383975|snRNA	2.3345	9.5924	5.15e-06	2.53e-05
Grc38_ENST00000630551|miRNA	2.38345	4.97767	1.84e-05	8e-05
Grc38_ENST00000625614|miRNA	2.46141	5.53363	2.64e-05	0.000112167
Grc38_ENST00000627736|miRNA	2.46301	6.07026	4.28e-07	2.48e-06
Grc38_ENST00000385302|miRNA	2.47526	10.7428	8.91e-11	8.26e-10
Grc38_ENST00000630014|miRNA	2.49768	3.91771	2.26e-05	9.7e-05
piRNA|DQ571524	2.51527	10.1369	1.13e-07	7.22e-07
piRNA|DQ595536	2.54017	12.6833	1.6e-07	9.94e-07
Grc38_ENST00000619973|miRNA	2.58421	3.46419	6.91e-05	0.000270233
Y_RNA_AAPE02039776.1/102994-103096	2.58589	9.88767	4.52e-10	3.75e-09
piRNA|DQ588594	2.64042	4.85566	2.53e-07	1.53e-06
Grc38_ENST00000516775|miRNA	2.64757	4.86357	0.000159853	0.000574492
Grc38_ENST00000630620|miRNA	2.7189	8.40034	1.09e-08	7.95e-08
piRNA|DQ593325	2.74773	4.58994	1.12e-07	7.21e-07
Grc38_ENST00000384425|snRNA	2.7714	5.42943	0.000262305	0.000873191
piRNA|DQ576880	2.77486	2.95724	0.00101086	0.00279477
Grc38_ENST00000630788|miRNA	2.77719	4.62225	4.55e-06	2.27e-05
Grc38_ENST00000626443|miRNA	2.78255	5.66482	2.54e-09	1.96e-08
Grc38_ENST00000387069|snRNA	2.79775	7.71102	3.12e-07	1.85e-06
piRNA|DQ600952	2.81375	4.77636	2.54e-06	1.32e-05
Grc38_ENST00000628701|miRNA	2.84889	9.30367	1.45e-07	9.12e-07
Grc38_ENST00000579264|miRNA	2.85301	2.80825	0.000278559	0.000923807
Grc38_ENST00000628724|miRNA	2.85543	3.35566	0.000773401	0.00220382
piRNA|DQ576605	2.94684	3.90788	0.000501705	0.00152591
Grc38_ENST00000408240|miRNA	2.94827	4.93	8.7e-08	5.63e-07
Grc38_ENST00000384499|snRNA	2.99506	9.25885	8.44e-10	6.85e-09
Y_RNA_AADD01087475.1/2469-2552	3.0154	10.918	4.47e-10	3.73e-09
piRNA|DQ593358	3.02439	4.1523	1.83e-05	8e-05
Grc38_ENST00000459170|miRNA	3.05918	4.22727	2.42e-05	0.000102997
Grc38_ENST00000580233|miRNA	3.06867	9.10166	1.14e-10	1.05e-09
Grc38_ENST00000365477|snRNA	3.11623	4.8771	9.76e-06	4.52e-05
Grc38_ENST00000611066|miRNA	3.12406	7.76829	4.43e-07	2.54e-06
Grc38_ENST00000363334|snRNA	3.1578	5.43902	2.88e-05	0.000121016
Grc38_ENST00000384093|snRNA	3.17293	3.97814	4.18e-06	2.11e-05
Grc38_ENST00000628052|miRNA	3.19472	4.01695	4.32e-06	2.17e-05
Grc38_ENST00000582082|miRNA	3.22488	4.17302	1.5e-05	6.68e-05
Grc38_ENST00000582090|miRNA	3.2444	5.88306	1.69e-11	1.69e-10
piRNA|DQ598639	3.26163	5.70115	8.86e-10	7.15e-09
Grc38_ENST00000580761|miRNA	3.31551	3.51624	1.81e-05	7.92e-05
piRNA|DQ571031	3.32181	10.4093	2.76e-07	1.66e-06
mirBASE_hsa-miR-4485-3p	3.35693	5.75318	2.46e-08	1.73e-07
Grc38_ENST00000612766|miRNA	3.35886	5.80168	6.77e-08	4.47e-07
Grc38_ENST00000626018|miRNA	3.38341	7.04054	2.55e-14	3.51e-13
Y_RNA_CT104669.1/59726-59616	3.40235	3.5	1.71e-07	1.06e-06
Grc38_ENST00000363426|snRNA	3.41414	5.30149	7.6e-08	4.94e-07
Grc38_ENST00000621427|miRNA	3.44407	9.48557	1.16e-10	1.06e-09
Y_RNA_AC190269.3/73147-73248	3.53359	10.4421	4.73e-16	7.78e-15
Y_RNA_AAPY01489510.1/220-119	3.54947	10.6154	6.57e-17	1.18e-15
Y_RNA_AAQR03087348.1/2666-2565	3.56137	10.4428	8.22e-16	1.33e-14
piRNA|DQ582264	3.58029	6.82478	2.33e-12	2.48e-11
piRNA|DQ597482	3.59669	9.75134	1.54e-12	1.67e-11
piRNA|DQ597971	3.61607	11.5496	3.14e-05	0.000130826
Grc38_ENST00000584345|miRNA	3.6625	3.15607	7.55e-05	0.000292117
piRNA|DQ592932	3.68009	4.3117	1.22e-06	6.73e-06
Grc38_ENST00000617238|miRNA	3.71514	7.94165	2.93e-13	3.49e-12
Grc38_ENST00000630984|miRNA	3.73096	2.6332	0.00068815	0.00200967
piRNA|DQ592931	3.76256	4.58362	3.46e-08	2.37e-07
Grc38_ENST00000364300|snRNA	3.76743	4.18443	4.19e-06	2.11e-05
Grc38_ENST00000363306|snRNA	3.80089	5.03415	3.29e-07	1.94e-06
piRNA|DQ598252	3.81014	8.14557	1.03e-12	1.13e-11
Grc38_ENST00000364421|snRNA	3.82587	5.47855	9.02e-06	4.24e-05
Grc38_ENST00000621981|miRNA	3.85282	5.56656	1.7e-09	1.33e-08
piRNA|DQ597341	3.85653	6.71329	1.48e-14	2.12e-13
piRNA|DQ596805	3.91209	12.1576	2.53e-13	3.05e-12
piRNA|DQ597403	3.94165	10.8281	1.7e-14	2.42e-13
Grc38_ENST00000580862|miRNA	4.02258	3.14415	2.1e-05	9.08e-05
Grc38_ENST00000384550|snoRNA	4.03652	11.8064	1.48e-17	2.74e-16
Grc38_ENST00000626841|miRNA	4.05616	11.7727	5.18e-18	1.01e-16
mirBASE_mmT-miR-5100	4.09485	2.91274	1.43e-05	6.41e-05
piRNA|DQ598183	4.11133	12.5882	6.85e-05	0.000268474
piRNA|DQ598675	4.12841	8.42687	1.9e-18	4.02e-17
piRNA|DQ576918	4.24727	6.74165	2.78e-11	2.75e-10
Grc38_ENST00000580344|miRNA	4.30452	6.62403	9.76e-12	1.01e-10
Grc38_ENST00000362291|miRNA	4.37391	6.18165	1.43e-14	2.06e-13
piRNA|DQ577772	4.43888	6.36675	7.87e-20	2.01e-18
Grc38_ENST00000606837|miRNA	4.46707	2.88066	4.38e-06	2.19e-05
Y_RNA_AAFR03014070.1/16387-16488	4.49813	6.74205	6.18e-11	5.88e-10
piRNA|DQ598312	4.59801	8.70812	2.14e-10	1.86e-09
Grc38_ENST00000616984|sRNA	4.60997	2.78376	1.06e-05	4.84e-05
Y_RNA_AAPN01172659.1/53662-53775	4.61871	4.14016	4.35e-12	4.58e-11
piRNA|DQ598175	4.64462	5.0607	1.6e-08	1.15e-07
piRNA|DQ570992	4.76096	10.4106	5.61e-25	2.35e-23
Grc38_ENST00000611300|sRNA	4.93252	3.01454	2.01e-08	1.43e-07
Y_RNA_AAQR03087350.1/1071-976	5.00587	7.20937	1.03e-22	3.56e-21
Y_RNA_AADN03001926.1/468172-468061	5.09048	6.03645	2.8e-21	8.36e-20
piRNA|DQ590013	5.11596	13.8893	1.51e-23	5.77e-22
Grc38_ENST00000581316|miRNA	5.12929	3.7576	1.99e-06	1.06e-05
Grc38_ENST00000459274|snRNA	5.13108	8.11787	1.33e-13	1.66e-12
piRNA|DQ597218	5.16076	11.8363	3.07e-21	9.01e-20
Y_RNA_AC193857.1/159000-159109	5.16579	5.55248	1.83e-17	3.35e-16
Grc38_ENST00000584072|miRNA	5.23043	5.38243	6.2e-09	4.65e-08
piRNA|DQ593356	5.27998	9.41049	2.59e-21	7.87e-20
Grc38_ENST00000610524|miRNA	5.28893	10.5098	1.05e-28	6.87e-27
Grc38_ENST00000584178|miRNA	5.37584	7.13649	1.48e-10	1.31e-09
Grc38_ENST00000384836|miRNA	5.47286	3.38905	0.000140353	0.000510666
Grc38_ENST00000617883|miRNA	5.57797	9.37397	2.84e-25	1.24e-23
mirBASE_bta-miR-2889	5.58503	8.57317	1.4e-19	3.42e-18
piRNA|DQ593407	5.62363	5.41724	1.03e-15	1.64e-14
piRNA|DQ571813	5.71492	12.9295	1.64e-19	3.95e-18
Grc38_ENST00000581364|miRNA	5.71512	6.42371	4.05e-13	4.6e-12
Grc38_ENST00000384835|miRNA	5.73118	3.13086	8.78e-09	6.47e-08
piRNA|DQ598180	5.82954	4.43588	4.18e-09	3.17e-08
piRNA|DQ593423	5.8579	3.26578	3.1e-08	2.17e-07
Y_RNA_AAFC03099238.1/121707-121818	5.86308	12.4804	5.74e-27	2.97e-25
Grc38_ENST00000584443|miRNA	5.9131	5.02438	2.53e-15	3.9e-14
Y_RNA_ABDC01601884.1/580-486	5.97481	8.67016	1.84e-33	1.8e-31
piRNA|DQ597347	6.00788	13.0805	1.11e-30	1.02e-28
piRNA|DQ597110	6.10372	7.77419	2.84e-15	4.31e-14
Y_RNA_AAHX01030026.1/7139-7028	6.20037	12.4588	6.17e-25	2.53e-23
piRNA|DQ575658	6.21389	9.69139	2.9e-28	1.7e-26
piRNA|DQ597215	6.22311	5.69872	5.01e-19	1.13e-17
Y_RNA_AAWR02036109.1/33571-33459	6.23174	12.4693	3.08e-27	1.64e-25
piRNA|DQ597916	6.23969	16.3634	3.92e-28	2.23e-26
Y_RNA_AAFC03099237.1/8865-8959	6.24715	10.0725	5.74e-37	6.73e-35
Grc38_ENST00000583357|miRNA	6.24736	5.67643	1.83e-06	9.77e-06
Grc38_ENST00000613558|miRNA	6.25982	4.22461	1.49e-13	1.83e-12
piRNA|DQ570956	6.38418	16.349	5.79e-28	3.19e-26
piRNA|DQ590548	6.43688	10.9825	2.12e-29	1.56e-27
Y_RNA_AC191785.1/102750-102844	6.46658	8.46688	4.83e-38	7.08e-36
Grc38_ENST00000612171|miRNA	6.70788	6.79127	3.9e-18	7.72e-17
Grc38_ENST00000577388|miRNA	6.91949	5.88214	1.92e-18	4.02e-17
Grc38_ENST00000582216|miRNA	7.02995	3.89132	1.4e-05	6.28e-05
Grc38_ENST00000626279|miRNA	7.27944	11.026	1.53e-38	2.44e-36
piRNA|DQ597217	7.28236	4.48673	1.92e-14	2.71e-13
Grc38_ENST00000625656|miRNA	7.31275	11.0395	8.06e-44	3.55e-41
Grc38_ENST00000626896|miRNA	7.33183	11.0394	3.33e-42	8.39e-40
Grc38_ENST00000627889|miRNA	7.41244	11.027	1.53e-43	4.5e-41
piRNA|DQ598677	7.96823	13.9851	1.15e-25	5.19e-24
piRNA|DQ598008	8.08072	12.8924	7.45e-29	5.05e-27
Y_RNA_AAYZ01133134.1/5808-5901	8.0864	15.3288	1.56e-40	3.42e-38
Grc38_ENST00000384886|miRNA	8.10892	3.09138	1.44e-07	9.11e-07
Y_RNA_AC205306.6/147779-147685	8.12116	15.3078	2.79e-37	3.52e-35
Y_RNA_AC073140.5/117955-118049	8.14786	15.311	3.7e-39	6.52e-37
Y_RNA_CT104657.1/45296-45390	8.15654	15.3067	2.11e-39	4.13e-37
piRNA|DQ592953	8.24105	14.4053	5.87e-46	3.45e-43
Grc38_ENST00000385059|miRNA	8.37738	3.43159	9.04e-09	6.64e-08
piRNA|DQ594465	8.3892	15.886	1.73e-29	1.32e-27
piRNA|DQ575656	8.50636	8.28198	1.46e-43	4.5e-41
piRNA|DQ594453	8.65099	17.7808	3.39e-48	2.98e-45
piRNA|DQ575660	8.70454	18.0509	2.06e-49	3.62e-46
piRNA|DQ575884	8.85757	15.2231	5.28e-26	2.45e-24
piRNA|DQ575882	9.22882	15.2129	1.74e-28	1.09e-26
piRNA|DQ576872	9.5206	15.1273	2.65e-37	3.52e-35
piRNA|DQ597975	9.53229	15.2179	6.28e-35	6.5e-33
Grc38_ENST00000385044|miRNA	9.70447	8.41003	4.29e-35	4.72e-33
