# Supplementary material for: Differential distribution and enrichment of non-coding RNAs in exosomes from normal and Cancer-associated fibroblasts in colorectal cancer
Source: Mol Cancer. 2018 Aug 3;17:114. doi: 10.1186/s12943-018-0863-4 (PMC6091058; doi:10.1186/s12943-018-0863-4)
Supplement: Supplementary file 6 — Excel file with two documents summarizing the results obtained from the differential expression CAF-CELL versus CAF-EXO analyses for differentially distributed lncRNAs and sncRNAs. (XLSX 60 kb) [file 12943_2018_863_MOESM6_ESM.xlsx]

## Sheet: lncRNAs_diff
NAME	logFC	logCPM	PValue	FDR
Grc38_ENST00000535076|processed_transcript	-8.03575	11.2219	2.59e-37	4.32e-34
Grc38_ENST00000412059|processed_transcript	-8.3096	10.2305	4.32e-24	3.61e-21
Grc38_ENST00000460249|processed_transcript	-6.8152	10.8554	5.18e-23	2.88e-20
Grc38_ENST00000480811|processed_transcript	-6.39492	9.51104	1.28e-21	5.36e-19
Grc38_ENST00000444470|processed_transcript	-8.95586	10.6954	1.81e-21	6.05e-19
Grc38_ENST00000492250|processed_transcript	-6.52988	10.8726	5.54e-21	1.35e-18
Grc38_ENST00000521127|processed_transcript	-7.95061	10.6566	5.68e-21	1.35e-18
Grc38_ENST00000454813|processed_transcript	-7.39701	10.2328	1.77e-20	3.69e-18
Grc38_ENST00000437681|sense_intronic	-5.12106	10.4172	5.4e-20	9.55e-18
Grc38_ENST00000605502|lincRNA	-5.86177	11.0754	5.72e-20	9.55e-18
Grc38_ENST00000442067|processed_transcript	-8.62744	10.9419	1.78e-19	2.7e-17
Grc38_ENST00000537965|processed_transcript	-7.14364	10.986	3.1e-19	4.3e-17
Grc38_ENST00000443799|processed_transcript	-7.37728	12.1966	6.75e-19	8.67e-17
Grc38_ENST00000501122|lincRNA	-5.8481	8.65803	1.61e-18	1.92e-16
Grc38_ENST00000491009|processed_transcript	-6.85768	10.8763	2.58e-18	2.87e-16
Grc38_ENST00000421068|processed_transcript	-7.4175	12.1157	3.84e-18	4e-16
Grc38_ENST00000434796|processed_transcript	-6.74463	10.6868	7.62e-18	7.48e-16
Grc38_ENST00000431268|processed_transcript	-7.531	11.611	1.17e-17	1.05e-15
Grc38_ENST00000540904|processed_transcript	-7.65851	10.9874	1.2e-17	1.05e-15
Grc38_ENST00000422207|processed_transcript	-8.61994	10.6598	5.5e-17	4.58e-15
Grc38_ENST00000538654|processed_transcript	-6.14979	14.354	7.06e-17	5.61e-15
Grc38_ENST00000431043|processed_transcript	-6.77368	12.8119	1.09e-16	8.29e-15
Grc38_ENST00000607520|processed_transcript	-4.37574	8.3763	1.28e-16	9.28e-15
Grc38_ENST00000545920|processed_transcript	-6.43178	10.0105	1.4e-16	9.73e-15
lncrnadb_neat1_homosapiens_2|Homo	-6.76551	8.64545	1.5e-16	9.98e-15
Grc38_ENST00000537024|processed_transcript	-6.42813	9.98275	1.79e-16	1.15e-14
Grc38_ENST00000451607|processed_transcript	-6.43183	13.2448	2.89e-16	1.77e-14
Grc38_ENST00000456293|processed_transcript	-7.05727	12.0125	2.98e-16	1.77e-14
Grc38_ENST00000540725|processed_transcript	-7.15692	9.73961	3.36e-16	1.93e-14
Grc38_ENST00000541416|processed_transcript	-6.45867	9.73174	3.89e-16	2.16e-14
Grc38_ENST00000544983|processed_transcript	-7.37611	11.4907	9.01e-16	4.85e-14
Grc38_ENST00000545308|processed_transcript	-6.19171	8.77726	1.16e-15	6.07e-14
Grc38_ENST00000508832|lincRNA	-5.01623	6.68908	1.7e-15	8.59e-14
Grc38_ENST00000578757|processed_transcript	-5.57471	13.7199	1.9e-15	9.34e-14
Grc38_ENST00000611296|lincRNA	-4.23301	7.37979	2.82e-15	1.34e-13
Grc38_ENST00000554693|lincRNA	-7.00571	11.2656	3.65e-15	1.69e-13
Grc38_ENST00000577700|lincRNA	-9.83814	6.56755	4.11e-15	1.85e-13
Grc38_ENST00000586231|lincRNA	-3.95898	15.5541	5.62e-15	2.47e-13
Grc38_ENST00000544550|processed_transcript	-4.7008	7.12251	6.49e-15	2.77e-13
Grc38_ENST00000534336|lincRNA	-3.32788	9.13969	7.11e-15	2.96e-13
Grc38_ENST00000416952|processed_transcript	-7.44184	9.2217	7.39e-15	3e-13
Grc38_ENST00000436656|processed_transcript	-7.68007	8.38919	8.89e-15	3.53e-13
Grc38_ENST00000422183|processed_transcript	-6.56727	10.6476	9.92e-15	3.85e-13
Grc38_ENST00000497774|processed_transcript	-5.57926	13.8152	1.18e-14	4.49e-13
Grc38_ENST00000449589|processed_transcript	-6.74134	8.1322	1.34e-14	4.98e-13
Grc38_ENST00000540865|processed_transcript	-5.66207	10.731	1.42e-14	5.16e-13
Grc38_ENST00000537925|processed_transcript	-7.10128	9.74578	1.61e-14	5.72e-13
Grc38_ENST00000427501|processed_transcript	-7.50208	7.90565	3.51e-14	1.22e-12
Grc38_ENST00000456812|processed_transcript	-6.45654	10.6485	1.25e-13	4.27e-12
Grc38_ENST00000567527|lincRNA	-5.28226	10.1289	1.51e-13	5.04e-12
Grc38_ENST00000605533|sense_intronic	-4.72845	8.19398	2.66e-12	8.71e-11
Grc38_ENST00000549804|processed_transcript	-4.99769	11.4437	7.21e-12	2.31e-10
Grc38_ENST00000433310|lincRNA	-10.023	6.52491	3.67e-11	1.16e-09
Grc38_ENST00000602573|lincRNA	-5.74021	7.99783	4.08e-11	1.26e-09
Grc38_ENST00000517138|scaRNA	-8.48801	5.34617	6.85e-11	2.08e-09
Grc38_ENST00000613917|lincRNA	-5.01526	8.20271	9.51e-11	2.83e-09
Grc38_ENST00000604135|sense_intronic	-5.27245	6.5041	1.1e-10	3.22e-09
Grc38_ENST00000623395|lincRNA	3.46713	6.08995	1.32e-10	3.79e-09
Grc38_ENST00000619449|lincRNA	-8.17668	4.78321	2.06e-10	5.82e-09
Grc38_ENST00000618227|lincRNA	-8.00636	4.69824	6.55e-10	1.82e-08
Grc38_ENST00000618132|lincRNA	-5.30806	4.85615	1.96e-09	5.35e-08
Grc38_ENST00000602478|lincRNA	-2.62035	11.7323	6.65e-09	1.79e-07
Grc38_ENST00000624919|sense_overlapping	2.8127	7.88172	1.99e-08	5.27e-07
Grc38_ENST00000617702|lincRNA	3.30864	6.42855	2.73e-08	7.11e-07
Grc38_ENST00000591384|lincRNA	-8.12952	4.75133	3.93e-08	1.01e-06
Grc38_ENST00000610851|lincRNA	-7.68751	4.45426	4.58e-08	1.16e-06
Grc38_ENST00000517961|lincRNA	-3.16424	6.83039	5.3e-08	1.32e-06
lncrnadb_mt-lipcar_hg_1|Homo	3.20863	10.2844	5.74e-08	1.4e-06
Grc38_ENST00000516060|scaRNA	-7.58063	4.52631	5.79e-08	1.4e-06
Grc38_ENST00000610122|lincRNA	4.94678	4.48883	7.41e-08	1.76e-06
Grc38_ENST00000458797|scaRNA	-3.52693	7.18287	9e-08	2.11e-06
Grc38_ENST00000501143|lincRNA	3.82357	4.05022	1.25e-07	2.91e-06
Grc38_ENST00000561320|lincRNA	-2.81307	5.98381	1.87e-07	4.26e-06
Grc38_ENST00000586185|lincRNA	-7.88707	4.67942	1.96e-07	4.37e-06
Grc38_ENST00000427111|lincRNA	3.14716	5.3347	1.96e-07	4.37e-06
Grc38_ENST00000516672|scaRNA	-3.53464	5.57592	2.91e-07	6.38e-06
Grc38_ENST00000627324|scaRNA	-7.2267	4.27703	3.94e-07	8.54e-06
Grc38_ENST00000516768|scaRNA	-3.78867	9.34073	6.67e-07	1.43e-05
Grc38_ENST00000544868|lincRNA	-4.6985	4.2688	9.21e-07	1.94e-05
Grc38_ENST00000563151|lincRNA	2.29925	7.92911	1.01e-06	2.11e-05
Grc38_ENST00000457339|lincRNA	10.3041	5.67931	1.09e-06	2.25e-05
Grc38_ENST00000503991|scaRNA	-4.01639	8.15067	1.16e-06	2.36e-05
Grc38_ENST00000602755|lincRNA	-3.81144	4.97562	1.37e-06	2.75e-05
Grc38_ENST00000541782|sense_intronic	-3.55332	5.93113	1.41e-06	2.79e-05
Grc38_ENST00000577122|processed_transcript	-2.35635	10.1109	1.42e-06	2.79e-05
Grc38_ENST00000360737|lincRNA	2.49646	5.68846	1.59e-06	3.06e-05
Grc38_ENST00000616527|lincRNA	-3.05927	5.23643	1.6e-06	3.06e-05
Grc38_ENST00000516089|scaRNA	-3.56467	6.26903	2.11e-06	4e-05
Grc38_ENST00000567488|lincRNA	-4.41943	4.44771	2.28e-06	4.27e-05
Grc38_ENST00000517097|scaRNA	-4.19676	4.85009	2.75e-06	5.11e-05
Grc38_ENST00000573457|processed_transcript	-2.20742	10.1059	3.68e-06	6.75e-05
Grc38_ENST00000629295|lincRNA	-2.20353	6.0752	4.42e-06	8.02e-05
Grc38_ENST00000551631|processed_transcript	-3.90746	4.54522	5.56e-06	9.97e-05
Grc38_ENST00000430247|lincRNA	-4.45975	6.57057	6.34e-06	0.000112415
Grc38_ENST00000575766|processed_transcript	-2.18699	10.0755	7.04e-06	0.000123558
Grc38_ENST00000609276|lincRNA	-7.16777	4.21257	8.06e-06	0.000138677
Grc38_ENST00000576410|processed_transcript	-2.32433	10.0897	8.06e-06	0.000138677
Grc38_ENST00000411509|lincRNA	-6.81127	3.98084	8.53e-06	0.000145257
lncrnadb_7sl_homosapiens_1|Homo	1.53109	14.7044	8.64e-06	0.0001455
Grc38_ENST00000574846|processed_transcript	-2.19391	10.1026	9.13e-06	0.000152232
Grc38_ENST00000575226|processed_transcript	-2.19019	10.0908	9.55e-06	0.000157739
Grc38_ENST00000576702|processed_transcript	-2.19507	10.0964	1.05e-05	0.000171238
Grc38_ENST00000629045|scaRNA	-3.07553	5.02513	1.19e-05	0.000191981
Grc38_ENST00000602301|vaultRNA	3.26822	10.0737	1.71e-05	0.000273708
Grc38_ENST00000573259|processed_transcript	-2.19571	10.0737	1.76e-05	0.000279134
Grc38_ENST00000622328|lincRNA	-4.85949	4.6133	1.98e-05	0.000311648
Grc38_ENST00000576096|processed_transcript	-2.29097	10.1095	2.17e-05	0.000337568
Grc38_ENST00000602361|lincRNA	-2.33289	10.9444	2.36e-05	0.00036374
lncrnadb_7sk_homosapiens_1|Homo	-2.0044	10.9584	2.56e-05	0.000391735
Grc38_ENST00000445817|lincRNA	2.15182	6.1553	2.82e-05	0.000428252
Grc38_ENST00000562952|sense_overlapping	-2.82426	4.79818	2.93e-05	0.000439669
Grc38_ENST00000617791|lincRNA	-6.6527	3.63777	3.22e-05	0.000478904
Grc38_ENST00000573479|lincRNA	2.33251	6.20467	3.26e-05	0.00048066
Grc38_ENST00000510505|lincRNA	-3.87317	4.47236	3.43e-05	0.000502258
Grc38_ENST00000553465|lincRNA	-4.52143	4.54025	4.84e-05	0.000702651
Grc38_ENST00000569832|processed_transcript	2.25804	5.23408	5.14e-05	0.000738902
Grc38_ENST00000612496|lincRNA	-3.5873	4.3197	6.05e-05	0.000862527
Grc38_ENST00000454068|processed_transcript	-3.61413	4.40189	6.38e-05	0.000901164
lncrnadb_kcnq1ot1_homosapiens_1|Homo	-3.35365	6.60474	6.92e-05	0.00097022
Grc38_ENST00000624184|sense_overlapping	-2.88576	5.61868	8.97e-05	0.00124666
Grc38_ENST00000565467|lincRNA	3.84324	3.05764	0.000134931	0.00186004
Grc38_ENST00000430728|lincRNA	-6.22407	3.6087	0.000146683	0.00200548
Grc38_ENST00000551361|processed_transcript	-3.77779	4.45567	0.000158653	0.00215149
Grc38_ENST00000550268|lincRNA	-6.11332	3.51292	0.000173313	0.00233134
Grc38_ENST00000616315|lincRNA	-6.67968	3.59793	0.000204423	0.00272782
Grc38_ENST00000618589|lincRNA	-1.71626	13.6135	0.000209827	0.00277771
Grc38_ENST00000456105|lincRNA	2.38055	4.77395	0.000219869	0.00288773
Grc38_ENST00000616691|lincRNA	-6.55265	3.60293	0.000222004	0.00289298
Grc38_ENST00000623027|lincRNA	3.18524	3.43621	0.00022613	0.00292392
Grc38_ENST00000545688|processed_transcript	-6.33082	3.71602	0.000270192	0.00346677
lncrnadb_yam-1_mm10_1|Mus	1.34925	16.3449	0.000278075	0.00354068
Grc38_ENST00000229465|lincRNA	-2.66252	4.33994	0.000286186	0.00361635
Grc38_ENST00000606229|sense_intronic	-4.02441	3.88973	0.000322015	0.0040385
Grc38_ENST00000441255|lincRNA	5.39907	3.00967	0.000339535	0.00422645
Grc38_ENST00000445646|lincRNA	-4.48825	5.86007	0.000418088	0.0051657
Grc38_ENST00000415386|lincRNA	2.05025	11.6072	0.000421293	0.00516704
Grc38_ENST00000511821|lincRNA	1.61785	8.04958	0.000430521	0.00524168
Grc38_ENST00000550723|lincRNA	2.23817	4.43218	0.000503827	0.00608973
Grc38_ENST00000623391|lincRNA	-2.21849	5.08534	0.000521194	0.00625433
Grc38_ENST00000458220|processed_transcript	-6.00651	3.17199	0.000586856	0.00699197
Grc38_ENST00000620465|lincRNA	-5.89842	3.17264	0.000628893	0.00743967
Grc38_ENST00000579933|lincRNA	2.02514	5.28552	0.000799477	0.00939105
Grc38_ENST00000604849|lincRNA	2.04465	6.32352	0.000867819	0.0101225
Grc38_ENST00000582965|lincRNA	-2.29318	5.20074	0.00100049	0.0114731
Grc38_ENST00000609880|lincRNA	5.92217	3.02661	0.00100214	0.0114731
Grc38_ENST00000443364|lincRNA	3.56531	3.29355	0.00100424	0.0114731
Grc38_ENST00000561622|3prime_overlapping_ncrna	-5.77099	3.13695	0.0011211	0.0127211
Grc38_ENST00000453784|lincRNA	-2.27012	4.21669	0.00120787	0.013613
Grc38_ENST00000627071|lincRNA	-3.57344	3.54487	0.00132652	0.0148499
Grc38_ENST00000527474|lincRNA	3.67017	2.56582	0.00134292	0.0149333
Grc38_ENST00000423943|lincRNA	5.01914	3.54769	0.0014492	0.0160083
Grc38_ENST00000574616|3prime_overlapping_ncrna	-1.98892	4.98026	0.00160505	0.0175246
Grc38_ENST00000419813|lincRNA	-5.73695	2.91046	0.00160747	0.0175246
Grc38_ENST00000421202|processed_transcript	-3.39734	3.59443	0.00181135	0.019619
Grc38_ENST00000626826|macro_lncRNA	-1.26379	8.73249	0.00185439	0.0199556
Grc38_ENST00000593917|processed_transcript	2.00434	4.49645	0.00211072	0.0225685
Grc38_ENST00000568394|lincRNA	2.91389	3.17214	0.00215729	0.0229195
Grc38_ENST00000313495|lincRNA	-2.99538	3.85776	0.00228644	0.0241379
Grc38_ENST00000400436|processed_transcript	-3.56016	3.79092	0.0023063	0.0241944
Grc38_ENST00000589496|3prime_overlapping_ncrna	-2.10622	5.46771	0.00242599	0.0252909
Grc38_ENST00000559030|lincRNA	1.58882	5.57828	0.00257322	0.0266592
Grc38_ENST00000505089|lincRNA	-1.41949	5.97511	0.0026935	0.0276284
Grc38_ENST00000608229|lincRNA	-2.81974	3.64055	0.00269989	0.0276284
Grc38_ENST00000608412|lincRNA	-5.74694	3.04382	0.0028054	0.028533
Grc38_ENST00000623290|lincRNA	-3.45736	3.73741	0.00284509	0.0287613
Grc38_ENST00000515031|lincRNA	-5.543	3.10758	0.00291157	0.029256
Grc38_ENST00000562127|lincRNA	3.90425	3.59122	0.00314318	0.0313942
Grc38_ENST00000516881|scaRNA	-5.80308	3.26051	0.00322427	0.0320124
Grc38_ENST00000597780|sense_intronic	-1.20627	17.5121	0.00339948	0.0334088
Grc38_ENST00000356047|lincRNA	-2.18839	3.89992	0.00341417	0.0334088
Grc38_ENST00000559298|lincRNA	-5.55926	3.00544	0.003425	0.0334088
Grc38_ENST00000528381|lincRNA	3.13037	2.3279	0.00352401	0.0341747
Grc38_ENST00000532619|lincRNA	-5.82925	3.73163	0.00378206	0.0364652
Grc38_ENST00000602813|lincRNA	1.23637	8.97006	0.00388662	0.037258
Grc38_ENST00000339037|lincRNA	5.32025	2.26986	0.0039843	0.037976
Grc38_ENST00000454224|lincRNA	-2.84067	3.79349	0.00402066	0.0381049
Grc38_ENST00000613376|lincRNA	-5.54245	2.84413	0.00438346	0.0411981
Grc38_ENST00000618925|lincRNA	-2.35544	3.79626	0.00439644	0.0411981
Grc38_ENST00000508096|sense_overlapping	2.52835	2.52194	0.00497121	0.0463239
Grc38_ENST00000555004|lincRNA	-5.46571	3.30318	0.00519275	0.0481195
Grc38_ENST00000529733|lincRNA	3.18448	2.47903	0.00525731	0.0484486
lncrnadb_Y-RNAs_hg_1|Homo	1.2737	12.3129	0.00542025	0.0496757

## Sheet: sncRNAs_diff
NAME	logFC	logCPM	PValue	FDR
Grc38_ENST00000384215|snoRNA	-11.5216	7.52401	1.19e-26	8.74e-25
Grc38_ENST00000384706|snoRNA	-10.2467	6.24421	5.15e-21	1.68e-19
Grc38_ENST00000364569|snRNA	-10.0019	5.92045	4.6e-19	1.25e-17
snoRNADB_HBII-135	-9.62206	5.55884	1.59e-18	3.83e-17
Grc38_ENST00000459159|snoRNA	-9.37593	5.30573	7.9e-17	1.51e-15
Grc38_ENST00000364953|snoRNA	-9.1022	5.17205	4.85e-12	5.08e-11
Grc38_ENST00000459124|snoRNA	-8.90191	4.57082	1.95e-14	2.76e-13
piRNA|DQ582536	-8.67673	4.39505	9.85e-12	1.01e-10
Grc38_ENST00000630949|snoRNA	-8.63082	4.53501	1.11e-13	1.39e-12
piRNA|DQ569993	-8.51059	8.51947	1.26e-25	7.38e-24
Grc38_ENST00000384136|snRNA	-8.43303	6.52706	5.16e-21	1.68e-19
Grc38_ENST00000363345|snoRNA	-8.38396	4.49585	6.82e-11	6.25e-10
Grc38_ENST00000384437|snoRNA	-8.30074	4.128	1.35e-11	1.38e-10
Grc38_ENST00000362723|snoRNA	-8.22408	4.40148	1.1e-09	8.58e-09
Grc38_ENST00000384320|snoRNA	-8.1554	3.77819	2.7e-10	2.26e-09
Grc38_ENST00000363753|snoRNA	-8.05089	6.59649	3.53e-22	1.38e-20
Grc38_ENST00000384342|snoRNA	-8.03941	4.14342	4.14e-10	3.39e-09
Grc38_ENST00000606769|snoRNA	-8.02578	3.91783	5.02e-10	4.09e-09
Grc38_ENST00000413522|snoRNA	-7.98358	4.28655	8.12e-10	6.44e-09
Grc38_ENST00000391232|snoRNA	-7.90588	3.96276	4.77e-09	3.25e-08
Grc38_ENST00000384339|snoRNA	-7.84375	4.03583	1.16e-09	9.02e-09
Grc38_ENST00000629536|snoRNA	-7.81834	3.71139	2.42e-09	1.74e-08
Grc38_ENST00000630429|snoRNA	-7.66285	3.59181	4.39e-08	2.67e-07
Grc38_ENST00000577887|snoRNA	-7.62369	3.48346	7.45e-08	4.41e-07
Grc38_ENST00000584275|snoRNA	-7.6014	3.59667	1.09e-08	7.24e-08
Grc38_ENST00000626886|snoRNA	-7.5912	3.5697	6.9e-08	4.13e-07
Grc38_ENST00000459163|snoRNA	-7.58184	5.84508	4.87e-14	6.45e-13
Grc38_ENST00000629038|snoRNA	-7.53084	3.32465	1.66e-07	9.26e-07
Grc38_ENST00000408612|snoRNA	-7.44927	6.00894	3.04e-21	1.09e-19
Grc38_ENST00000386062|snoRNA	-7.40506	5.77732	4.57e-21	1.55e-19
Grc38_ENST00000384452|snoRNA	-7.40032	3.63424	9.37e-08	5.42e-07
Grc38_ENST00000365153|snoRNA	-7.36673	5.94873	3.77e-15	5.87e-14
piRNA|DQ587514	-7.3565	8.78244	9.96e-25	5.48e-23
Grc38_ENST00000458974|snoRNA	-7.35099	3.34611	1.98e-06	9.62e-06
Grc38_ENST00000365128|snoRNA	-7.34027	3.57358	5.31e-08	3.2e-07
Grc38_ENST00000410413|snoRNA	-7.32651	3.14431	7.26e-07	3.73e-06
piRNA|DQ598646	-7.29575	5.54516	1.31e-18	3.19e-17
Grc38_ENST00000516438|snRNA	-7.25173	3.39861	1.64e-05	7.03e-05
Grc38_ENST00000583619|snoRNA	-7.23435	5.65158	2.21e-18	5.13e-17
Grc38_ENST00000410712|snRNA	-7.22579	3.29851	5.38e-05	0.000212928
Grc38_ENST00000364294|snRNA	-7.22022	5.81942	3.13e-17	6.26e-16
Grc38_ENST00000362805|snoRNA	-7.21601	3.32141	4.06e-07	2.16e-06
Grc38_ENST00000607707|snoRNA	-7.21389	3.11125	1.66e-06	8.28e-06
Grc38_ENST00000408376|snoRNA	-7.19686	3.15992	4.63e-07	2.46e-06
Grc38_ENST00000391007|snoRNA	-7.19556	3.28719	8.73e-07	4.44e-06
Grc38_ENST00000384401|snoRNA	-7.15757	3.27047	5.98e-07	3.12e-06
Grc38_ENST00000384033|snoRNA	-7.12748	3.33381	3.98e-06	1.88e-05
Grc38_ENST00000386307|snoRNA	-7.09171	6.3515	4.75e-22	1.82e-20
Grc38_ENST00000390842|snoRNA	-6.98497	2.83796	3.68e-05	0.000151547
Grc38_ENST00000384388|snRNA	-6.97691	3.11294	8.58e-06	3.85e-05
Grc38_ENST00000362145|miRNA	-6.95453	3.06914	0.000108928	0.000411637
Grc38_ENST00000384304|snoRNA	-6.93986	6.84596	2.58e-21	9.46e-20
piRNA|DQ571511	-6.91243	3.24321	1.89e-06	9.28e-06
Grc38_ENST00000516327|snoRNA	-6.90799	3.15267	1.02e-05	4.52e-05
Grc38_ENST00000391079|snoRNA	-6.8932	5.49979	4.26e-17	8.34e-16
Grc38_ENST00000364802|snoRNA	-6.87998	2.8155	9.44e-05	0.000359079
Grc38_ENST00000384574|snoRNA	-6.8787	5.24314	1.16e-17	2.4e-16
Grc38_ENST00000364773|snoRNA	-6.87862	3.30178	1.72e-06	8.49e-06
Grc38_ENST00000391162|snoRNA	-6.82176	3.2233	2.75e-05	0.000114887
Grc38_ENST00000459174|snoRNA	-6.81521	2.94102	5.67e-06	2.6e-05
Grc38_ENST00000363202|snoRNA	-6.80791	3.14596	5.41e-06	2.49e-05
Grc38_ENST00000385016|miRNA	-6.79955	3.05019	2.13e-05	9e-05
Grc38_ENST00000384334|snoRNA	-6.78346	2.75611	6.22e-05	0.000245099
Grc38_ENST00000384769|snoRNA	-6.77666	6.02262	5.45e-20	1.63e-18
Grc38_ENST00000386967|snoRNA	-6.74707	5.48602	4.59e-16	8.09e-15
Grc38_ENST00000363064|snoRNA	-6.72495	7.24549	2.82e-22	1.18e-20
Grc38_ENST00000629167|miRNA	-6.67573	2.97439	8.57e-06	3.85e-05
Grc38_ENST00000606526|snoRNA	-6.65203	3.04353	7.91e-05	0.000305612
Grc38_ENST00000384356|snoRNA	-6.64391	2.90092	9.22e-06	4.12e-05
Grc38_ENST00000385051|miRNA	-6.64314	2.83596	7.25e-05	0.000281268
Grc38_ENST00000385274|miRNA	-6.62109	2.73516	0.000266311	0.000934209
Grc38_ENST00000459342|snoRNA	-6.58829	5.81636	1.65e-16	3.05e-15
Grc38_ENST00000459579|snoRNA	-6.58804	8.60134	3.21e-29	3.32e-27
Grc38_ENST00000365607|snoRNA	-6.56033	7.44683	1.34e-20	4.22e-19
Grc38_ENST00000362222|miRNA	-6.55718	2.96436	3.78e-05	0.000154555
Grc38_ENST00000363981|snoRNA	-6.53925	7.02007	3.2e-17	6.33e-16
Grc38_ENST00000459299|snoRNA	-6.51514	5.19257	1.76e-12	1.96e-11
Grc38_ENST00000517277|snRNA	-6.50509	2.89592	0.000613218	0.00202224
Grc38_ENST00000621753|snRNA	-6.50264	2.82481	0.00486693	0.0129271
Grc38_ENST00000459475|snoRNA	-6.47847	2.67032	1.7e-05	7.28e-05
Grc38_ENST00000363664|snoRNA	-6.46009	2.85394	9.3e-05	0.000354579
Grc38_ENST00000582661|miRNA	-6.43077	3.06477	0.000113697	0.000426911
Grc38_ENST00000505219|snoRNA	-6.39607	2.9752	0.000346815	0.00118821
Grc38_ENST00000384335|snoRNA	-6.3873	2.46931	0.000128049	0.000477744
Grc38_ENST00000362412|snoRNA	-6.38205	2.89908	3.74e-05	0.000153444
Grc38_ENST00000384252|snoRNA	-6.37781	7.78094	8.84e-25	5.02e-23
Grc38_ENST00000362698|snRNA	-6.37356	9.6135	3.05e-26	2.15e-24
Grc38_ENST00000408749|snRNA	-6.34537	2.61295	0.000100781	0.000381666
Grc38_ENST00000364310|snRNA	-6.34304	2.80222	0.00195854	0.00575791
Grc38_ENST00000459386|snoRNA	-6.3295	2.56085	5.09e-05	0.000202774
Grc38_ENST00000365028|snoRNA	-6.31697	2.7376	0.000185952	0.000669655
Grc38_ENST00000584034|miRNA	-6.2886	2.32589	0.00137092	0.00421325
Grc38_ENST00000391076|snoRNA	-6.28796	2.60831	0.000142452	0.000523711
Grc38_ENST00000383903|snoRNA	-6.28167	7.15282	2.09e-27	1.75e-25
Grc38_ENST00000365423|snoRNA	-6.26913	5.5947	4.02e-12	4.31e-11
Grc38_ENST00000391100|snoRNA	-6.26324	2.7782	0.000384012	0.00131055
Grc38_ENST00000386157|snoRNA	-6.25817	2.69775	0.000206164	0.000734927
Grc38_ENST00000385243|miRNA	-6.24745	2.51857	0.00020421	0.000731164
Grc38_ENST00000363389|snoRNA	-6.24661	4.94223	8.03e-11	7.33e-10
Grc38_ENST00000583032|snoRNA	-6.23312	6.12062	1.96e-18	4.67e-17
Grc38_ENST00000363626|snoRNA	-6.22175	4.50246	1.28e-10	1.14e-09
Grc38_ENST00000364027|snoRNA	-6.21411	2.60026	0.000265032	0.000931581
Grc38_ENST00000384384|snoRNA	-6.20256	2.32572	0.000396383	0.00135016
Grc38_ENST00000384756|snoRNA	-6.19605	7.14936	6.03e-23	2.79e-21
Grc38_ENST00000516528|snoRNA	-6.17948	2.51445	0.000173264	0.00062732
Grc38_ENST00000391208|snRNA	-6.17354	2.67554	0.00302916	0.00848068
Grc38_ENST00000459126|snoRNA	-6.16963	2.16856	0.00577175	0.0150579
Grc38_ENST00000384048|snoRNA	-6.16395	4.50251	6.37e-13	7.43e-12
Grc38_ENST00000385231|miRNA	-6.15327	2.32167	0.000876689	0.00281211
Grc38_ENST00000411292|snoRNA	-6.15006	4.67215	2.41e-11	2.38e-10
Grc38_ENST00000408492|miRNA	-6.14687	2.41312	0.000406871	0.00137788
Grc38_ENST00000606349|miRNA	-6.14435	2.42211	0.00391338	0.0105697
Grc38_ENST00000362310|miRNA	-6.13859	2.48287	0.000412682	0.00139488
Grc38_ENST00000362507|snRNA	-6.10709	4.30641	3.98e-07	2.13e-06
Grc38_ENST00000363836|snoRNA	-6.10438	2.35312	0.000209755	0.000746219
Grc38_ENST00000362477|snRNA	-6.10381	8.97852	4.69e-19	1.25e-17
Grc38_ENST00000408587|snoRNA	-6.09342	2.41458	0.00133202	0.00410086
Grc38_ENST00000384723|snRNA	-6.08732	2.44689	0.00332179	0.00921209
Grc38_ENST00000515909|snRNA	-6.0627	2.52066	0.001616	0.00486457
Grc38_ENST00000364139|snoRNA	-6.04412	5.58036	8.41e-15	1.25e-13
Grc38_ENST00000629784|miRNA	-5.99803	2.20533	0.00057815	0.00192098
Grc38_ENST00000363091|snoRNA	-5.99766	4.10082	1.33e-10	1.17e-09
Grc38_ENST00000629629|snoRNA	-5.99375	2.53038	0.000421805	0.00142299
Grc38_ENST00000364849|snoRNA	-5.98354	5.89144	9.04e-18	1.92e-16
Grc38_ENST00000383875|snoRNA	-5.93323	6.54537	9.19e-20	2.7e-18
Grc38_ENST00000410818|snRNA	-5.92258	6.16553	1.07e-17	2.25e-16
Grc38_ENST00000364969|snoRNA	-5.90073	4.68045	2.55e-10	2.15e-09
Grc38_ENST00000384262|snoRNA	-5.89777	5.16439	8.85e-13	1.01e-11
Grc38_ENST00000363450|snoRNA	-5.89345	4.43996	4.64e-11	4.37e-10
Grc38_ENST00000629259|miRNA	-5.89177	5.70298	1.57e-15	2.52e-14
Grc38_ENST00000458893|snoRNA	-5.87988	5.2124	1.48e-14	2.12e-13
Grc38_ENST00000384121|snRNA	-5.86167	2.30394	0.00347113	0.00955104
Grc38_ENST00000384084|snoRNA	-5.84173	2.52717	0.000992388	0.00312693
Grc38_ENST00000384999|miRNA	-5.83168	4.41597	1.38e-11	1.39e-10
Grc38_ENST00000583823|snoRNA	-5.79829	2.27263	0.00147188	0.00448438
Grc38_ENST00000410433|snoRNA	-5.77798	6.50787	1.8e-21	6.75e-20
Grc38_ENST00000365731|miRNA	-5.77296	1.91942	0.00378409	0.0102678
Grc38_ENST00000362307|miRNA	-5.72718	7.0727	1.17e-20	3.73e-19
Grc38_ENST00000408189|snoRNA	-5.7269	5.16946	1.27e-14	1.83e-13
Grc38_ENST00000363925|snRNA	-5.70028	6.62697	2.66e-19	7.44e-18
Grc38_ENST00000362443|snRNA	-5.66883	2.20688	0.00201447	0.00588305
Grc38_ENST00000364938|snoRNA	-5.65863	5.20077	5.62e-13	6.6e-12
Grc38_ENST00000584949|snoRNA	-5.65717	5.12211	4.35e-14	5.8e-13
Grc38_ENST00000615356|snRNA	-5.65671	4.11455	7.16e-08	4.26e-07
Grc38_ENST00000384390|snoRNA	-5.64938	5.86539	1.65e-07	9.23e-07
Grc38_ENST00000459187|snoRNA	-5.59765	4.93971	3.69e-13	4.39e-12
Grc38_ENST00000363286|snRNA	-5.56813	10.0467	7.28e-17	1.41e-15
Grc38_ENST00000383953|snoRNA	-5.55832	6.89131	3.23e-21	1.14e-19
Grc38_ENST00000384027|snoRNA	-5.54919	4.12794	1.24e-08	8.19e-08
Grc38_ENST00000362147|miRNA	-5.54819	1.72741	0.00643147	0.01651
Grc38_ENST00000607313|snoRNA	-5.51727	5.53843	1.51e-13	1.85e-12
Grc38_ENST00000364370|snoRNA	-5.49495	4.77793	4.53e-11	4.28e-10
Grc38_ENST00000362704|snoRNA	-5.47769	3.87522	2.88e-08	1.81e-07
Grc38_ENST00000365382|snoRNA	-5.4211	6.80118	9.45e-19	2.38e-17
Grc38_ENST00000628177|snoRNA	-5.38355	4.11089	1.92e-09	1.43e-08
Grc38_ENST00000408813|snoRNA	-5.33321	5.29485	2.06e-12	2.27e-11
Grc38_ENST00000391002|snoRNA	-5.3324	4.06295	5.6e-09	3.78e-08
Grc38_ENST00000385021|miRNA	-5.32966	3.80454	4.42e-07	2.35e-06
Grc38_ENST00000362803|snoRNA	-5.31382	4.60874	3.75e-11	3.59e-10
Grc38_ENST00000362111|miRNA	-5.31326	9.6947	2.36e-17	4.78e-16
Grc38_ENST00000362165|miRNA	-5.29267	8.37493	4.97e-19	1.31e-17
snoRNADB_E3	-5.27145	4.67095	1.95e-11	1.94e-10
Grc38_ENST00000408373|snoRNA	-5.26495	4.65522	1.68e-10	1.47e-09
Grc38_ENST00000628458|snoRNA	-5.25714	4.01604	3.33e-07	1.79e-06
Grc38_ENST00000364259|snoRNA	-5.24521	3.84639	2.42e-06	1.16e-05
Grc38_ENST00000517242|snoRNA	-5.21425	3.98841	2.54e-06	1.21e-05
Grc38_ENST00000384096|snoRNA	-5.16007	3.87839	2.93e-08	1.83e-07
Grc38_ENST00000363593|snoRNA	-5.11919	5.48805	1.72e-11	1.73e-10
Grc38_ENST00000363543|snoRNA	-5.11524	3.95762	4.62e-06	2.14e-05
Grc38_ENST00000363214|snoRNA	-5.08652	5.72659	2.71e-12	2.93e-11
Grc38_ENST00000364533|snoRNA	-5.08565	3.82363	1.31e-06	6.57e-06
Grc38_ENST00000364617|snoRNA	-5.06629	3.81051	7.48e-07	3.83e-06
Grc38_ENST00000364009|snoRNA	-5.04504	4.86244	1.35e-10	1.19e-09
Grc38_ENST00000363536|snoRNA	-5.03789	4.53604	6.93e-10	5.55e-09
Grc38_ENST00000365668|snRNA	-5.02389	7.09486	4.92e-18	1.08e-16
Grc38_ENST00000390708|miRNA	-5.02112	4.05958	8.4e-08	4.88e-07
Grc38_ENST00000365633|snoRNA	-4.99331	5.72521	6.64e-13	7.69e-12
Grc38_ENST00000362262|miRNA	-4.96366	4.14692	5.75e-11	5.3e-10
Grc38_ENST00000385245|miRNA	-4.96135	7.67081	2.93e-16	5.26e-15
Grc38_ENST00000362298|miRNA	-4.95158	3.39564	1.9e-06	9.3e-06
Grc38_ENST00000384693|snoRNA	-4.94917	7.09503	9.26e-19	2.36e-17
Grc38_ENST00000629478|snRNA	-4.94694	3.25288	4.76e-06	2.19e-05
Grc38_ENST00000362281|miRNA	-4.94531	3.63052	1.04e-05	4.59e-05
Grc38_ENST00000385045|miRNA	-4.93738	4.17042	1.18e-09	9.13e-09
Grc38_ENST00000365223|snoRNA	-4.93099	5.58259	2.93e-13	3.53e-12
Grc38_ENST00000384176|snoRNA	-4.92357	3.70271	4.97e-07	2.61e-06
Grc38_ENST00000516209|snRNA	-4.9068	4.81143	4.81e-09	3.27e-08
Grc38_ENST00000362155|miRNA	-4.89904	4.63365	1.76e-09	1.33e-08
Grc38_ENST00000385006|miRNA	-4.89175	4.29195	7.62e-09	5.1e-08
snoRNADB_U104	-4.86164	6.25757	1.98e-14	2.78e-13
Grc38_ENST00000625943|snoRNA	-4.86118	6.01744	2.75e-13	3.34e-12
Grc38_ENST00000364043|snoRNA	-4.84951	6.1166	3.19e-15	5.02e-14
Grc38_ENST00000384967|miRNA	-4.80945	8.34069	1.23e-13	1.53e-12
Grc38_ENST00000365530|snoRNA	-4.78419	5.05231	2.07e-10	1.78e-09
mirBASE_tch-miR-27a-3p	-4.77671	8.52681	4.97e-16	8.6e-15
Grc38_ENST00000386847|snoRNA	-4.75175	4.2607	1.56e-09	1.19e-08
Grc38_ENST00000364977|snoRNA	-4.75051	3.51204	6.62e-06	3.02e-05
Grc38_ENST00000362883|snoRNA	-4.74316	5.98948	2.62e-11	2.57e-10
snoRNADB_HBII-202	-4.72958	5.69243	7.57e-12	7.8e-11
Grc38_ENST00000628672|miRNA	-4.72049	4.79771	1.45e-07	8.23e-07
Grc38_ENST00000458770|snoRNA	-4.7062	4.55925	1.41e-08	9.11e-08
Grc38_ENST00000383885|snoRNA	-4.69227	3.48272	2.13e-06	1.03e-05
Grc38_ENST00000408136|miRNA	-4.65545	3.12488	0.000142085	0.000523455
Grc38_ENST00000384360|snoRNA	-4.63367	5.1107	4.33e-09	2.99e-08
Grc38_ENST00000384849|miRNA	-4.63312	8.39749	4.62e-15	7.02e-14
Grc38_ENST00000516336|snRNA	-4.63242	3.43216	0.000170576	0.000620629
Grc38_ENST00000385289|miRNA	-4.6238	9.27336	4.78e-18	1.06e-16
Grc38_ENST00000385130|miRNA	-4.62376	4.96298	9.43e-10	7.45e-09
Grc38_ENST00000365161|snoRNA	-4.61132	4.03297	3.96e-08	2.43e-07
Grc38_ENST00000385073|miRNA	-4.58141	8.82371	4.17e-16	7.42e-15
Grc38_ENST00000364578|snoRNA	-4.57681	4.0166	1.88e-07	1.04e-06
Grc38_ENST00000517038|snRNA	-4.54987	3.84367	4.19e-06	1.96e-05
Grc38_ENST00000362279|miRNA	-4.54742	5.90842	9.7e-15	1.42e-13
Grc38_ENST00000385019|miRNA	-4.54112	9.31697	2.29e-17	4.68e-16
Grc38_ENST00000579017|miRNA	-4.52674	4.18105	0.00197604	0.00579967
Grc38_ENST00000385129|miRNA	-4.52298	9.80887	2.7e-16	4.9e-15
Grc38_ENST00000410991|snRNA	-4.52045	4.02956	1.05e-05	4.6e-05
Grc38_ENST00000384714|snoRNA	-4.47868	6.00927	1.01e-15	1.67e-14
Grc38_ENST00000583861|snoRNA	-4.46841	5.64655	4.17e-14	5.65e-13
Grc38_ENST00000385135|miRNA	-4.46529	10.3327	2.63e-20	8.11e-19
Grc38_ENST00000349529|miRNA	-4.45377	4.63078	3.14e-08	1.95e-07
Grc38_ENST00000365172|snoRNA	-4.40696	4.61922	1.82e-09	1.37e-08
Grc38_ENST00000385012|miRNA	-4.398	5.5769	1.04e-09	8.19e-09
Grc38_ENST00000516564|snRNA	-4.38186	3.39198	0.00182887	0.00547078
Grc38_ENST00000365574|snRNA	-4.36557	4.33644	2.87e-08	1.8e-07
Grc38_ENST00000385288|miRNA	-4.33726	5.26689	2.07e-10	1.78e-09
Grc38_ENST00000626830|miRNA	-4.32396	4.72676	2.08e-07	1.15e-06
Grc38_ENST00000408573|snoRNA	-4.31393	5.41324	3.88e-09	2.7e-08
Grc38_ENST00000581525|snoRNA	-4.31105	5.76883	6.83e-14	8.78e-13
Grc38_ENST00000584923|snoRNA	-4.3059	5.5411	4.15e-12	4.42e-11
Grc38_ENST00000363299|snRNA	-4.27978	3.07771	0.00660029	0.0168451
Grc38_ENST00000384220|snoRNA	-4.27384	2.83799	0.000110442	0.000416464
Grc38_ENST00000516146|snRNA	-4.26865	2.93028	0.00010074	0.000381666
Grc38_ENST00000386747|snoRNA	-4.2548	5.22381	1.24e-09	9.51e-09
Grc38_ENST00000390930|snoRNA	-4.24616	4.46966	2.75e-06	1.31e-05
Grc38_ENST00000384416|snoRNA	-4.24303	4.60004	2.67e-09	1.9e-08
Grc38_ENST00000459473|snoRNA	-4.23996	4.00504	1.78e-06	8.77e-06
Grc38_ENST00000384147|snoRNA	-4.18244	7.18725	2.31e-10	1.95e-09
Grc38_ENST00000385235|miRNA	-4.15285	3.57294	3.98e-05	0.000161274
Grc38_ENST00000606412|snoRNA	-4.12815	3.75645	1.5e-05	6.45e-05
Grc38_ENST00000618978|snRNA	-4.12465	4.97285	7.56e-08	4.45e-07
Grc38_ENST00000384832|miRNA	-4.10842	7.03863	2.5e-14	3.46e-13
Grc38_ENST00000611454|snRNA	-4.10071	2.85809	0.00118613	0.0036839
Grc38_ENST00000384287|snoRNA	-4.07098	2.98481	0.000138939	0.000514015
Grc38_ENST00000411053|snRNA	-4.06665	2.90674	0.000748281	0.00244023
Grc38_ENST00000622286|snRNA	-4.05811	2.92524	0.00541253	0.0141627
Grc38_ENST00000458838|snoRNA	-4.05357	3.41147	9.51e-06	4.23e-05
Grc38_ENST00000362607|snoRNA	-4.04388	3.89937	2.26e-06	1.09e-05
Grc38_ENST00000391145|snoRNA	-4.01906	3.57298	3.95e-05	0.000160121
Grc38_ENST00000362114|miRNA	-3.99896	4.19154	2.74e-06	1.31e-05
Grc38_ENST00000364805|snoRNA	-3.9939	4.57529	4.28e-06	2e-05
Grc38_ENST00000384158|snoRNA	-3.96938	3.89806	7.09e-05	0.000275637
Grc38_ENST00000385024|miRNA	-3.94371	6.65433	1.06e-14	1.54e-13
Grc38_ENST00000401182|miRNA	-3.94105	3.24568	6.57e-05	0.000256931
Grc38_ENST00000385227|miRNA	-3.93186	5.89434	2.09e-09	1.54e-08
Grc38_ENST00000385271|miRNA	-3.91554	4.24015	1.56e-07	8.76e-07
Grc38_ENST00000362260|miRNA	-3.89089	3.86737	6.4e-07	3.3e-06
Grc38_ENST00000384988|miRNA	-3.87224	6.46394	2.82e-10	2.33e-09
Grc38_ENST00000386745|snoRNA	-3.86693	5.98626	1.99e-09	1.48e-08
Grc38_ENST00000458892|snoRNA	-3.8666	3.45457	1.12e-05	4.9e-05
Grc38_ENST00000391150|snoRNA	-3.85609	4.96849	7.12e-08	4.25e-07
Grc38_ENST00000362150|miRNA	-3.83206	7.36048	6.37e-10	5.13e-09
Grc38_ENST00000386683|snoRNA	-3.82805	2.87836	0.000999066	0.00314171
Grc38_ENST00000591554|miRNA	-3.80769	5.21954	3e-07	1.62e-06
Grc38_ENST00000617320|miRNA	-3.80615	4.54487	7.96e-08	4.68e-07
Grc38_ENST00000363660|snoRNA	-3.80512	2.55042	0.000330829	0.00113565
Grc38_ENST00000625876|snoRNA	-3.79365	5.25971	3.29e-11	3.2e-10
Grc38_ENST00000410482|snRNA	-3.78907	6.01787	4.57e-09	3.15e-08
Grc38_ENST00000384662|snoRNA	-3.78645	2.51883	0.00191045	0.0056638
Grc38_ENST00000384765|snoRNA	-3.77741	5.01192	1.22e-07	7e-07
Grc38_ENST00000385282|miRNA	-3.76517	6.46117	2.79e-09	1.98e-08
Grc38_ENST00000362280|miRNA	-3.75532	9.28565	1.23e-16	2.34e-15
Grc38_ENST00000363485|snoRNA	-3.74141	2.79059	0.000500842	0.00167997
Grc38_ENST00000580972|snRNA	-3.73666	3.39433	3.45e-05	0.000142438
Grc38_ENST00000384229|snoRNA	-3.73636	5.59007	1.32e-09	1.01e-08
Grc38_ENST00000385050|miRNA	-3.73239	2.40732	0.00037212	0.00127243
Grc38_ENST00000362705|snoRNA	-3.69934	4.99929	1.37e-08	8.92e-08
Grc38_ENST00000606577|snoRNA	-3.69758	4.2768	1.3e-06	6.53e-06
Grc38_ENST00000384816|miRNA	-3.67967	6.9775	2.22e-12	2.41e-11
Grc38_ENST00000365400|snoRNA	-3.67736	3.40508	0.000121724	0.000456076
Grc38_ENST00000385020|miRNA	-3.65963	4.66009	6.23e-07	3.23e-06
Grc38_ENST00000385214|miRNA	-3.62705	5.87401	3.78e-09	2.65e-08
Grc38_ENST00000384606|snRNA	-3.62433	3.41729	0.000893068	0.00284908
Grc38_ENST00000364699|snoRNA	-3.62084	2.45499	0.00128905	0.0039755
Grc38_ENST00000390738|miRNA	-3.60996	3.9288	4.56e-06	2.11e-05
Grc38_ENST00000625314|snoRNA	-3.60517	2.49724	0.00140112	0.00429109
Grc38_ENST00000390856|snoRNA	-3.60261	5.19833	1.34e-08	8.74e-08
Grc38_ENST00000362239|miRNA	-3.58883	7.11435	4.62e-09	3.16e-08
Grc38_ENST00000363315|snoRNA	-3.58768	3.92387	5.7e-05	0.000224952
Grc38_ENST00000364931|snRNA	-3.57647	4.04557	3.49e-05	0.000144036
Grc38_ENST00000385223|miRNA	-3.56896	2.02445	0.00213956	0.00622772
Grc38_ENST00000614083|snRNA	-3.56072	3.30491	0.00179144	0.00537432
Grc38_ENST00000390180|miRNA	-3.55568	2.31139	0.00258032	0.00737653
Grc38_ENST00000385207|miRNA	-3.54968	4.64857	9.69e-08	5.59e-07
Grc38_ENST00000362251|miRNA	-3.53793	6.3583	2.79e-14	3.84e-13
Grc38_ENST00000620232|snoRNA	-3.50777	5.20058	2.75e-10	2.29e-09
Grc38_ENST00000627983|snoRNA	-3.50659	3.93015	6.66e-06	3.03e-05
Grc38_ENST00000619225|snRNA	-3.49845	8.60422	2.03e-14	2.84e-13
Grc38_ENST00000410396|snRNA	-3.49013	8.35398	2.08e-09	1.54e-08
Grc38_ENST00000408564|snoRNA	-3.48966	2.58907	0.000987551	0.00312222
Grc38_ENST00000362224|miRNA	-3.47832	6.03391	1.67e-08	1.07e-07
Grc38_ENST00000606623|snRNA	-3.45091	4.42261	7.91e-05	0.000305612
Grc38_ENST00000384365|snoRNA	-3.43989	2.88884	0.00476398	0.0126919
Grc38_ENST00000385280|miRNA	-3.42563	2.4253	0.00218235	0.00633133
Grc38_ENST00000384850|miRNA	-3.42422	3.83116	4.14e-05	0.000166995
Grc38_ENST00000384512|snoRNA	-3.40338	4.81323	5.84e-08	3.51e-07
Grc38_ENST00000619178|snoRNA	-3.39601	4.68559	1.03e-07	5.95e-07
Grc38_ENST00000385055|miRNA	-3.37719	3.04717	0.00263609	0.00749943
Grc38_ENST00000385077|miRNA	-3.36949	3.04841	0.00187061	0.00556444
Grc38_ENST00000365178|snoRNA	-3.36621	2.43039	0.00583223	0.0151931
Grc38_ENST00000384898|miRNA	-3.3615	4.5703	4.05e-08	2.47e-07
Grc38_ENST00000363610|snoRNA	-3.36077	2.52941	0.00738719	0.0186373
Grc38_ENST00000385028|miRNA	-3.3485	2.61352	0.00270381	0.00765499
Grc38_ENST00000410457|snRNA	-3.34168	3.36678	0.000398615	0.00135514
Grc38_ENST00000410144|snRNA	-3.32191	3.44143	0.000274426	0.000958856
Grc38_ENST00000384792|snoRNA	-3.29482	3.83301	5.35e-05	0.000212043
Grc38_ENST00000459584|snoRNA	-3.28417	3.09662	0.000807393	0.00261364
Grc38_ENST00000363742|snoRNA	-3.27905	2.62239	0.00329534	0.00915316
Grc38_ENST00000408687|miRNA	-3.27213	2.40973	0.00891812	0.0221194
Grc38_ENST00000384885|miRNA	-3.26703	8.66082	1.72e-10	1.49e-09
Grc38_ENST00000411404|snRNA	-3.26445	5.53138	5.31e-07	2.77e-06
Grc38_ENST00000362252|miRNA	-3.2634	6.47015	1.38e-10	1.21e-09
Grc38_ENST00000385128|miRNA	-3.24697	9.04994	2.09e-07	1.15e-06
Grc38_ENST00000385022|miRNA	-3.24478	4.23135	2.02e-05	8.56e-05
Grc38_ENST00000459623|snoRNA	-3.24328	3.63264	8.15e-05	0.000311409
Grc38_ENST00000448188|snoRNA	-3.24265	6.18145	4.91e-09	3.32e-08
Grc38_ENST00000385236|miRNA	-3.23642	9.16834	1.7e-07	9.45e-07
Grc38_ENST00000459083|snoRNA	-3.2167	3.05545	0.00140927	0.00430854
Grc38_ENST00000385270|miRNA	-3.21039	5.40709	3.97e-09	2.75e-08
Grc38_ENST00000365659|snoRNA	-3.1933	2.88885	0.000560583	0.00186967
Grc38_ENST00000629919|miRNA	-3.18759	2.53811	0.0136159	0.0317583
Grc38_ENST00000630092|snoRNA	-3.1721	4.7114	1.52e-07	8.6e-07
Grc38_ENST00000385212|miRNA	-3.1683	7.10178	2.49e-09	1.79e-08
Grc38_ENST00000386972|miRNA	-3.16503	8.71515	6.23e-10	5.03e-09
Grc38_ENST00000384892|miRNA	-3.15008	2.83276	0.0139665	0.0323248
Grc38_ENST00000384993|miRNA	-3.13942	5.70699	4.09e-05	0.000165379
Grc38_ENST00000384679|snoRNA	-3.12055	2.66796	0.00328658	0.00914322
Grc38_ENST00000390225|miRNA	-3.11534	4.03777	5.12e-05	0.0002037
Grc38_ENST00000385273|miRNA	-3.10805	9.1478	2.37e-08	1.5e-07
Grc38_ENST00000578311|miRNA	-3.08774	2.9574	0.000959104	0.0030487
Grc38_ENST00000363217|snoRNA	-3.08474	5.5052	3.1e-08	1.93e-07
Grc38_ENST00000621466|miRNA	-3.05244	10.0958	2.12e-08	1.35e-07
Grc38_ENST00000401190|miRNA	-3.04954	2.45708	0.0161627	0.0367258
Grc38_ENST00000626963|snoRNA	-3.04541	4.85173	1.6e-05	6.91e-05
Grc38_ENST00000459433|snoRNA	-3.04279	3.3171	0.000962107	0.00305274
Grc38_ENST00000385026|miRNA	-3.03405	7.35678	2.78e-07	1.51e-06
Grc38_ENST00000390227|miRNA	-3.02848	4.14724	4.84e-05	0.000193727
Grc38_ENST00000517041|snRNA	-3.0241	3.28215	0.000580691	0.00192579
Grc38_ENST00000620446|snoRNA	-3.02179	5.12594	2.23e-09	1.63e-08
snoRNADB_U17b	-2.98153	5.59261	1.25e-06	6.33e-06
Grc38_ENST00000385015|miRNA	-2.98066	2.85297	0.0102068	0.0248263
Grc38_ENST00000362218|miRNA	-2.94842	6.22574	6.51e-07	3.35e-06
Grc38_ENST00000362183|miRNA	-2.92953	2.91537	0.0129289	0.0304262
Grc38_ENST00000630110|miRNA	-2.90892	3.96754	0.000127218	0.000475649
Grc38_ENST00000580533|snoRNA	-2.90347	5.11766	2.75e-07	1.5e-06
Grc38_ENST00000362153|miRNA	-2.88847	5.13812	4.43e-05	0.000177959
Grc38_ENST00000384831|miRNA	-2.87273	3.78282	0.000249743	0.000881358
Grc38_ENST00000408061|snoRNA	-2.86743	2.7156	0.011369	0.0271285
Grc38_ENST00000577988|snoRNA	-2.85574	5.55917	2.52e-06	1.21e-05
Grc38_ENST00000362117|miRNA	-2.85447	5.00365	1.92e-06	9.35e-06
Grc38_ENST00000631292|snoRNA	-2.84349	4.97289	3.47e-07	1.86e-06
Grc38_ENST00000585078|snoRNA	-2.82915	2.39205	0.00511954	0.0134963
Grc38_ENST00000391286|snoRNA	-2.82211	4.16195	0.000112959	0.000425043
Grc38_ENST00000362104|miRNA	-2.81635	6.84348	1.12e-09	8.72e-09
Grc38_ENST00000385301|miRNA	-2.80927	5.21752	6.7e-05	0.000261802
Grc38_ENST00000362159|miRNA	-2.7937	2.53431	0.00492771	0.0130688
Grc38_ENST00000364995|snoRNA	-2.79238	2.74174	0.0187154	0.0417188
Grc38_ENST00000606724|miRNA	-2.79045	5.77422	2.26e-08	1.44e-07
Grc38_ENST00000384965|miRNA	-2.79009	2.47066	0.00193271	0.00570163
Grc38_ENST00000385254|miRNA	-2.78846	6.75526	1.54e-07	8.69e-07
Grc38_ENST00000625845|snoRNA	-2.78748	5.0775	2.36e-07	1.29e-06
Grc38_ENST00000383870|snoRNA	-2.78161	2.84354	0.00770654	0.0193875
Grc38_ENST00000384881|miRNA	-2.78074	2.33943	0.0108097	0.0260054
Grc38_ENST00000362202|miRNA	-2.77989	8.70086	9.62e-11	8.68e-10
Grc38_ENST00000385277|miRNA	-2.77226	8.69379	2.81e-10	2.33e-09
Grc38_ENST00000390861|snoRNA	-2.74911	2.53032	0.0196301	0.0435922
Grc38_ENST00000362125|miRNA	-2.7445	3.68623	0.000230667	0.000818961
Grc38_ENST00000364113|snoRNA	-2.72981	4.01307	2.91e-05	0.000121059
Grc38_ENST00000362173|miRNA	-2.72854	3.83328	0.0021606	0.00627857
Grc38_ENST00000384915|miRNA	-2.72731	4.36639	0.00616654	0.0159461
Grc38_ENST00000579879|snoRNA	-2.72367	6.5478	1.08e-08	7.18e-08
Grc38_ENST00000384853|miRNA	-2.7207	3.53902	0.000156394	0.000571391
Grc38_ENST00000386037|snoRNA	-2.71812	3.66704	0.000293071	0.00102198
Grc38_ENST00000362302|miRNA	-2.70795	3.16957	0.00120138	0.00372471
Grc38_ENST00000383860|snRNA	-2.68848	3.02171	0.00347836	0.009556
Grc38_ENST00000384863|miRNA	-2.68704	7.44824	4.68e-07	2.47e-06
Grc38_ENST00000385092|miRNA	-2.67807	8.54536	1.03e-06	5.22e-06
Grc38_ENST00000385266|miRNA	-2.66801	3.55778	0.00334097	0.00923618
Grc38_ENST00000385029|miRNA	-2.66701	2.87648	0.0171941	0.0387197
Grc38_ENST00000364432|snoRNA	-2.64865	2.98024	0.00718282	0.0181812
Grc38_ENST00000384865|miRNA	-2.63577	5.65639	0.000184894	0.000667208
Grc38_ENST00000459155|snoRNA	-2.63262	2.81768	0.0213874	0.0467285
Grc38_ENST00000384876|miRNA	-2.61548	6.28175	4.42e-06	2.05e-05
Grc38_ENST00000620268|snRNA	-2.61166	7.67969	2.41e-06	1.16e-05
Grc38_ENST00000384871|miRNA	-2.60521	4.72263	2.72e-05	0.000113821
Grc38_ENST00000385004|miRNA	-2.60203	6.15083	8.06e-08	4.72e-07
Grc38_ENST00000613527|miRNA	-2.60128	6.34802	1.71e-06	8.48e-06
Grc38_ENST00000408827|miRNA	-2.59509	4.24158	0.0011069	0.00345
Grc38_ENST00000579969|snoRNA	-2.5937	2.35141	0.00404895	0.0109191
Grc38_ENST00000384852|miRNA	-2.58832	5.0712	0.000140845	0.000519975
Grc38_ENST00000410545|snRNA	-2.5874	5.17765	0.000154323	0.000564996
mirBASE_efT-miR-26c	-2.58529	9.61246	1.4e-08	9.08e-08
Grc38_ENST00000362317|miRNA	-2.58228	4.14155	0.000313323	0.00107766
Grc38_ENST00000571722|snoRNA	-2.57705	5.10353	2.36e-06	1.14e-05
Grc38_ENST00000385010|miRNA	-2.57358	4.98886	7.99e-05	0.000307193
Grc38_ENST00000362181|miRNA	-2.55056	5.33439	9.25e-06	4.12e-05
Grc38_ENST00000362102|miRNA	-2.54838	7.74331	1.45e-07	8.23e-07
Grc38_ENST00000385054|miRNA	-2.543	9.62105	1.35e-08	8.83e-08
Grc38_ENST00000408314|snoRNA	-2.53582	2.82334	0.0171792	0.0387197
Grc38_ENST00000385300|miRNA	-2.52489	12.3125	3.68e-08	2.27e-07
Grc38_ENST00000362205|miRNA	-2.52264	9.61626	2.7e-08	1.7e-07
Grc38_ENST00000365444|snoRNA	-2.51887	4.22789	2.7e-05	0.000113144
Grc38_ENST00000439232|snoRNA	-2.51503	3.31844	0.00244204	0.00699257
Grc38_ENST00000365080|snoRNA	-2.503	2.92219	0.0101933	0.0248263
Grc38_ENST00000613956|snRNA	-2.49755	7.72909	4.1e-06	1.93e-05
Grc38_ENST00000411315|snRNA	-2.48222	3.38097	0.00177178	0.00532442
Grc38_ENST00000362162|miRNA	-2.38879	4.54824	0.00139454	0.00427837
Grc38_ENST00000384970|miRNA	-2.37824	4.58416	2.47e-05	0.000104171
Grc38_ENST00000428514|snoRNA	-2.36466	4.01105	0.00457111	0.0122151
Grc38_ENST00000362309|miRNA	-2.35913	10.8872	2.32e-09	1.69e-08
Grc38_ENST00000391141|snoRNA	-2.32186	3.13713	0.00861279	0.0214528
mirBASE_sha-miR-21	-2.30353	13.0581	6.04e-07	3.14e-06
Grc38_ENST00000390204|miRNA	-2.29544	2.72437	0.0131943	0.030939
Grc38_ENST00000384214|snoRNA	-2.28889	3.70625	0.000887775	0.00284135
Grc38_ENST00000579844|miRNA	-2.2862	2.94232	0.00645578	0.0165482
Grc38_ENST00000362134|miRNA	-2.2677	13.072	8.02e-07	4.09e-06
Grc38_ENST00000384901|miRNA	-2.26482	4.02203	0.00201123	0.00588305
Grc38_ENST00000365699|miRNA	-2.19079	6.81149	8.13e-05	0.000311363
Grc38_ENST00000364089|snoRNA	-2.18564	2.86434	0.0139266	0.0323248
Grc38_ENST00000385240|miRNA	-2.17369	5.92153	2.95e-06	1.4e-05
Grc38_ENST00000628908|miRNA	-2.1617	10.7259	1.57e-06	7.83e-06
Grc38_ENST00000384907|miRNA	-2.14859	4.55533	0.0026916	0.00764502
Grc38_ENST00000390981|snoRNA	-2.10423	3.9662	0.00657013	0.0167925
Grc38_ENST00000385025|miRNA	-2.06211	5.46202	6.83e-05	0.000266024
Grc38_ENST00000385011|miRNA	-2.06075	8.34996	0.00878719	0.0218563
Grc38_ENST00000385060|miRNA	-2.03077	6.30718	7.71e-06	3.47e-05
Grc38_ENST00000362135|miRNA	-2.02108	6.72356	0.000239598	0.000848959
Grc38_ENST00000385230|miRNA	-1.95	3.51329	0.022161	0.0479429
Grc38_ENST00000621667|miRNA	-1.94213	3.69543	0.0133036	0.0311538
Grc38_ENST00000362265|miRNA	-1.93192	4.74407	0.00263168	0.007499
Grc38_ENST00000384906|miRNA	-1.85665	7.32256	0.00195307	0.00575144
Grc38_ENST00000385043|miRNA	-1.82304	10.515	6.34e-05	0.000249096
Grc38_ENST00000385199|miRNA	-1.81121	6.75808	0.000736553	0.00241028
Grc38_ENST00000606190|snRNA	-1.77742	5.3563	0.0117793	0.0279938
Grc38_ENST00000582890|miRNA	-1.77321	4.63243	0.00317534	0.00886177
Grc38_ENST00000362195|miRNA	-1.73509	4.82861	0.00705131	0.0179183
Grc38_ENST00000362227|miRNA	-1.73454	6.08645	0.000489587	0.00164535
Grc38_ENST00000384918|miRNA	-1.72788	6.61109	0.000146515	0.000537528
Grc38_ENST00000384879|miRNA	-1.71951	4.61132	0.00348988	0.0095727
Grc38_ENST00000521276|miRNA	-1.64878	8.09129	0.00102855	0.00322865
Grc38_ENST00000362215|miRNA	-1.64753	8.5783	0.00369382	0.010085
Grc38_ENST00000384976|miRNA	-1.63519	4.86919	0.0140533	0.0324349
Grc38_ENST00000410361|snRNA	-1.60401	5.8884	0.00271742	0.00768117
Grc38_ENST00000390183|miRNA	-1.58993	4.0273	0.0220404	0.0477739
Grc38_ENST00000384581|snoRNA	-1.46869	3.92169	0.0223526	0.0482389
Grc38_ENST00000385009|miRNA	-1.45576	6.18009	0.00192924	0.00570163
Grc38_ENST00000384889|miRNA	-1.41672	6.80265	0.00597427	0.0155172
Grc38_ENST00000385209|miRNA	-1.40828	7.18299	0.00242007	0.00695641
Grc38_ENST00000385258|miRNA	-1.38952	5.96763	0.0102612	0.0249242
Grc38_ENST00000578242|miRNA	-1.33062	5.94169	0.0115967	0.0275971
Grc38_ENST00000362761|snoRNA	-1.30806	5.4458	0.00899248	0.0222655
Grc38_ENST00000362283|miRNA	-1.26504	8.89338	0.00306587	0.00856983
Grc38_ENST00000385299|miRNA	-1.25701	7.73893	0.00319816	0.00891133
Grc38_ENST00000384992|miRNA	-1.25067	10.3943	0.00385676	0.0104328
Grc38_ENST00000385233|miRNA	-1.22359	7.86146	0.00276967	0.00781632
Grc38_ENST00000362295|miRNA	-1.2096	9.50231	0.00636175	0.0163787
Grc38_ENST00000362116|miRNA	-1.19577	9.51961	0.00769059	0.019375
Grc38_ENST00000362105|miRNA	-1.1593	9.48715	0.00789849	0.0197855
piRNA|DQ594740	-1.07604	15.36	0.0152862	0.0350965
Grc38_ENST00000362263|miRNA	-1.06702	7.41249	0.00780824	0.0196153
piRNA|DQ582566	-1.0323	15.1824	0.0206522	0.0454038
piRNA|DQ570940	1.25861	13.7161	0.00146176	0.00446128
piRNA|DQ590835	1.27662	7.63256	0.00343343	0.00947692
piRNA|DQ598167	1.32117	9.97636	0.00226389	0.00654631
piRNA|DQ598445	1.38547	10.1925	0.00295366	0.00829569
piRNA|DQ600952	1.48724	4.77636	0.0110488	0.0264719
Grc38_ENST00000630786|miRNA	1.57864	4.69365	0.00520036	0.0136576
Grc38_ENST00000630551|miRNA	1.64817	4.97767	0.00355338	0.00973173
piRNA|DQ595536	1.6638	12.6833	0.000402692	0.00136636
Y_RNA_AAPE02039776.1/102994-103096	1.6868	9.88767	2.81e-05	0.000116978
Grc38_ENST00000362291|miRNA	1.81333	6.18165	0.00073773	0.00241028
Grc38_ENST00000578924|miRNA	1.9362	5.56701	0.000310462	0.00106991
piRNA|DQ576605	1.94972	3.90788	0.019926	0.0441191
Y_RNA_CT104669.1/59726-59616	2.04323	3.5	0.00104823	0.00327291
piRNA|DQ584698	2.05115	9.64137	1.33e-05	5.78e-05
Grc38_ENST00000580233|miRNA	2.11445	9.10166	3.88e-06	1.83e-05
Grc38_ENST00000410794|snRNA	2.14764	4.19026	0.00019212	0.000690457
Grc38_ENST00000625614|miRNA	2.15229	5.53363	0.0002961	0.00102847
piRNA|DQ596538	2.17367	9.64375	9.92e-06	4.4e-05
Grc38_ENST00000516659|snRNA	2.22179	3.17241	0.00242151	0.00695641
Grc38_ENST00000384770|snRNA	2.2378	3.28661	0.000833868	0.00268945
Grc38_ENST00000384093|snRNA	2.24866	3.97814	0.000310095	0.00106991
Grc38_ENST00000385302|miRNA	2.35691	10.7428	5.61e-10	4.55e-09
piRNA|DQ593358	2.38381	4.1523	0.000568162	0.00189137
Grc38_ENST00000408240|miRNA	2.40486	4.93	1.88e-05	8.01e-05
piRNA|DQ593325	2.51839	4.58994	1.42e-05	6.16e-05
Grc38_ENST00000384472|snRNA	2.523	3.3864	0.000618189	0.00203482
Grc38_ENST00000384181|snRNA	2.53212	3.57596	0.000293988	0.00102315
Grc38_ENST00000630788|miRNA	2.56085	4.62225	5.05e-05	0.000201826
Grc38_ENST00000630014|miRNA	2.57567	3.91771	2.52e-05	0.000105995
Grc38_ENST00000612766|miRNA	2.59293	5.80168	1.72e-05	7.34e-05
Grc38_ENST00000582090|miRNA	2.59347	5.88306	8.21e-08	4.79e-07
piRNA|DQ571524	2.60744	10.1369	4.33e-08	2.64e-07
piRNA|DQ598252	2.68486	8.14557	1.4e-07	7.96e-07
piRNA|DQ576918	2.685	6.74165	6.83e-06	3.09e-05
Grc38_ENST00000384619|snRNA	2.6859	8.79041	0.000173484	0.00062732
piRNA|DQ582838	2.68593	4.22698	7.96e-05	0.000306614
Grc38_ENST00000619973|miRNA	2.69696	3.46419	4.79e-05	0.000191961
Grc38_ENST00000621981|miRNA	2.71391	5.56656	7.57e-06	3.42e-05
Grc38_ENST00000628052|miRNA	2.73085	4.01695	6.42e-05	0.000251643
Grc38_ENST00000605806|snRNA	2.74213	8.99627	1.48e-05	6.39e-05
piRNA|DQ597968	2.74335	2.8938	0.000965784	0.00305889
Y_RNA_AC190269.3/73147-73248	2.76415	10.4421	5.31e-11	4.93e-10
Y_RNA_AAPY01489510.1/220-119	2.82024	10.6154	7.43e-12	7.7e-11
Y_RNA_AAQR03087348.1/2666-2565	2.82068	10.4428	5.1e-11	4.75e-10
piRNA|DQ597403	2.83128	10.8281	7.33e-09	4.92e-08
Y_RNA_AADD01087475.1/2469-2552	2.86875	10.918	2.37e-09	1.72e-08
piRNA|DQ598639	2.87638	5.70115	7.55e-08	4.45e-07
piRNA|DQ597482	2.97512	9.75134	1.91e-09	1.43e-08
Grc38_ENST00000459170|miRNA	3.00074	4.22727	1.01e-05	4.48e-05
Grc38_ENST00000383902|snRNA	3.10283	3.25083	1.3e-05	5.66e-05
Grc38_ENST00000384446|snRNA	3.1176	5.85282	4.74e-11	4.44e-10
mirBASE_hsa-miR-4485-3p	3.12799	5.75318	2.4e-07	1.31e-06
Grc38_ENST00000630620|miRNA	3.1379	8.40034	8.58e-11	7.79e-10
Grc38_ENST00000626443|miRNA	3.15844	5.66482	3.53e-11	3.4e-10
Grc38_ENST00000627736|miRNA	3.21902	6.07026	2.23e-10	1.9e-09
piRNA|DQ597341	3.25021	6.71329	2.5e-11	2.46e-10
Grc38_ENST00000617238|miRNA	3.32003	7.94165	3.33e-11	3.22e-10
piRNA|DQ588594	3.32507	4.85566	1.45e-09	1.11e-08
piRNA|DQ582264	3.34788	6.82478	4.42e-11	4.21e-10
Grc38_ENST00000630744|miRNA	3.3553	4.48152	3.23e-09	2.28e-08
piRNA|DQ592931	3.36351	4.58362	2.21e-07	1.21e-06
Grc38_ENST00000614774|snRNA	3.36688	9.9073	4.68e-07	2.47e-06
piRNA|DQ577772	3.3843	6.36675	4.32e-13	5.11e-12
Grc38_ENST00000626841|miRNA	3.44818	11.7727	3.95e-14	5.39e-13
Grc38_ENST00000384550|snoRNA	3.48398	11.8064	4.27e-14	5.74e-13
Grc38_ENST00000363314|snRNA	3.49561	3.42377	3.12e-05	0.000129339
Grc38_ENST00000611300|sRNA	3.59615	3.01454	6.73e-06	3.06e-05
Grc38_ENST00000619109|snRNA	3.64642	10.2644	4.49e-12	4.74e-11
Grc38_ENST00000626018|miRNA	3.6679	7.04054	7.56e-16	1.28e-14
piRNA|DQ592932	3.71604	4.3117	9.33e-07	4.74e-06
Grc38_ENST00000363426|snRNA	3.82873	5.30149	1.17e-10	1.05e-09
Y_RNA_AAPN01172659.1/53662-53775	3.91373	4.14016	1.33e-08	8.73e-08
Y_RNA_AAFR03014070.1/16387-16488	3.98371	6.74205	3.17e-09	2.24e-08
piRNA|DQ570992	4.01122	10.4106	1.78e-19	5.05e-18
piRNA|DQ596805	4.03453	12.1576	6.17e-14	8.05e-13
piRNA|DQ598675	4.05667	8.42687	7.08e-18	1.54e-16
Grc38_ENST00000383858|snRNA	4.15749	9.72835	6.08e-15	9.15e-14
Grc38_ENST00000384328|snRNA	4.17285	2.82441	3.78e-05	0.000154555
Y_RNA_AAQR03087350.1/1071-976	4.21572	7.20937	3.56e-18	8.14e-17
Grc38_ENST00000384610|snRNA	4.23213	9.04025	2.13e-09	1.56e-08
piRNA|DQ593356	4.25629	9.41049	1.01e-15	1.67e-14
piRNA|DQ571031	4.35914	10.4093	1.1e-10	9.85e-10
Grc38_ENST00000517280|snRNA	4.41166	3.75116	1.82e-05	7.76e-05
piRNA|DQ590013	4.41279	13.8893	4.63e-19	1.25e-17
piRNA|DQ571813	4.47687	12.9295	6.12e-14	8.04e-13
Grc38_ENST00000621427|miRNA	4.50112	9.48557	7.54e-16	1.28e-14
Grc38_ENST00000628701|miRNA	4.53941	9.30367	7.08e-15	1.06e-13
Grc38_ENST00000363306|snRNA	4.62671	5.03415	2.29e-10	1.95e-09
Grc38_ENST00000606801|snRNA	4.66864	4.09966	0.00618179	0.0159621
Y_RNA_ABDC01601884.1/580-486	4.67196	8.67016	3.14e-24	1.62e-22
piRNA|DQ597215	4.67558	5.69872	6.58e-14	8.52e-13
Grc38_ENST00000610524|miRNA	4.68255	10.5098	4.72e-24	2.38e-22
Y_RNA_AADN03001926.1/468172-468061	4.72718	6.03645	9.8e-19	2.43e-17
Grc38_ENST00000365477|snRNA	4.73959	4.8771	2.08e-12	2.28e-11
Y_RNA_AC193857.1/159000-159109	4.77374	5.55248	3.92e-15	6.05e-14
piRNA|DQ597347	4.77529	13.0805	2.93e-22	1.2e-20
Grc38_ENST00000384592|snRNA	4.87077	5.72353	1.51e-13	1.85e-12
Grc38_ENST00000364300|snRNA	4.88703	4.18443	4.24e-12	4.5e-11
Grc38_ENST00000384476|snRNA	4.98069	8.41418	3.83e-09	2.67e-08
Grc38_ENST00000411247|snRNA	5.00576	2.65066	0.00202206	0.00589546
Grc38_ENST00000383975|snRNA	5.02053	9.5924	2.02e-18	4.73e-17
Grc38_ENST00000612171|miRNA	5.05795	6.79127	1.25e-12	1.42e-11
Grc38_ENST00000384425|snRNA	5.06658	5.42943	1.8e-12	1.99e-11
Y_RNA_AAFC03099238.1/121707-121818	5.09866	12.4804	2.64e-22	1.13e-20
piRNA|DQ597110	5.11851	7.77419	5.8e-12	6.05e-11
Grc38_ENST00000387069|snRNA	5.14063	7.71102	7.3e-18	1.57e-16
Y_RNA_AAFC03099237.1/8865-8959	5.16776	10.0725	1.35e-28	1.19e-26
Grc38_ENST00000363327|snRNA	5.17656	3.78806	1.47e-08	9.43e-08
Grc38_ENST00000611066|miRNA	5.30109	7.76829	2.97e-15	4.71e-14
Grc38_ENST00000516502|snRNA	5.30956	2.31676	6.19e-06	2.83e-05
Grc38_ENST00000384499|snRNA	5.31815	9.25885	5.21e-23	2.48e-21
piRNA|DQ597397	5.35192	10.1543	4.92e-07	2.58e-06
Grc38_ENST00000612638|miRNA	5.35615	3.68335	1.08e-08	7.2e-08
Y_RNA_AAWR02036109.1/33571-33459	5.36523	12.4693	3.13e-22	1.25e-20
Grc38_ENST00000582082|miRNA	5.37778	4.17302	1.7e-12	1.91e-11
piRNA|DQ593423	5.39843	3.26578	3.62e-08	2.24e-07
Grc38_ENST00000584443|miRNA	5.49064	5.02438	4.98e-16	8.6e-15
Y_RNA_AAHX01030026.1/7139-7028	5.49934	12.4588	3.3e-21	1.14e-19
piRNA|DQ590548	5.50541	10.9825	1.06e-23	5.17e-22
Y_RNA_AC191785.1/102750-102844	5.50927	8.46688	5.91e-31	6.51e-29
piRNA|DQ598312	5.58755	8.70812	1.04e-13	1.32e-12
Grc38_ENST00000628107|miRNA	5.70826	2.57261	1.33e-07	7.58e-07
piRNA|DQ570956	5.80258	16.349	1.36e-24	7.27e-23
Grc38_ENST00000517228|miRNA	5.80934	2.15928	0.00088903	0.00284135
piRNA|DQ597916	5.8235	16.3634	1.25e-25	7.38e-24
Grc38_ENST00000459274|snRNA	5.85495	8.11787	1.38e-16	2.58e-15
Grc38_ENST00000613023|snRNA	5.85907	8.90164	1.18e-13	1.48e-12
piRNA|DQ575658	5.86636	9.69139	3.51e-26	2.29e-24
Grc38_ENST00000579051|miRNA	5.95982	2.1408	0.000624107	0.00205047
piRNA|DQ593407	5.96915	5.41724	1.1e-15	1.8e-14
Grc38_ENST00000584185|miRNA	6.13919	3.32092	3.97e-10	3.27e-09
piRNA|DQ597218	6.14513	11.8363	4.77e-27	3.82e-25
Grc38_ENST00000364421|snRNA	6.19375	5.47855	9.37e-13	1.06e-11
Grc38_ENST00000580344|miRNA	6.20549	6.62403	4.34e-20	1.32e-18
Grc38_ENST00000582216|miRNA	6.25537	3.89132	4.88e-08	2.95e-07
Grc38_ENST00000581316|miRNA	6.33768	3.7576	7.34e-10	5.85e-09
Grc38_ENST00000363334|snRNA	6.46743	5.43902	4.06e-15	6.22e-14
Grc38_ENST00000577388|miRNA	6.56508	5.88214	4.38e-18	9.89e-17
mirBASE_bta-miR-2889	6.61264	8.57317	9.59e-26	6.03e-24
piRNA|DQ597217	6.66024	4.48673	8.79e-14	1.12e-12
piRNA|DQ598180	7.03895	4.43588	7.16e-13	8.24e-12
Y_RNA_AC073140.5/117955-118049	7.19298	15.311	2.13e-33	2.68e-31
Grc38_ENST00000617883|miRNA	7.22336	9.37397	1.64e-35	2.89e-33
piRNA|DQ598677	7.25432	13.9851	8.15e-23	3.68e-21
Y_RNA_AAYZ01133134.1/5808-5901	7.2664	15.3288	2.34e-35	3.74e-33
Y_RNA_AC205306.6/147779-147685	7.39642	15.3078	4.15e-33	4.87e-31
Y_RNA_CT104657.1/45296-45390	7.4373	15.3067	4.87e-35	6.59e-33
Grc38_ENST00000614084|miRNA	7.49747	2.28504	0.000297827	0.00103243
Grc38_ENST00000516337|miRNA	7.56172	2.24182	0.000586727	0.00194216
Grc38_ENST00000627889|miRNA	7.68695	11.027	1.28e-45	4.51e-43
Grc38_ENST00000584072|miRNA	7.69804	5.38243	7.93e-16	1.33e-14
Grc38_ENST00000613558|miRNA	7.70013	4.22461	2.57e-09	1.84e-08
piRNA|DQ575656	7.70437	8.28198	8.97e-39	1.97e-36
Grc38_ENST00000581364|miRNA	7.70651	6.42371	8.64e-19	2.24e-17
piRNA|DQ594465	7.7676	15.886	8.5e-27	6.51e-25
Grc38_ENST00000625656|miRNA	7.8248	11.0395	1.26e-47	1.11e-44
Grc38_ENST00000626896|miRNA	7.85887	11.0394	5.14e-46	2.26e-43
piRNA|DQ575884	7.9128	15.2231	1.17e-22	5.17e-21
Grc38_ENST00000626279|miRNA	7.91421	11.026	6.59e-43	1.66e-40
Grc38_ENST00000617733|miRNA	7.98086	2.60486	0.000245575	0.00086839
piRNA|DQ598008	8.01928	12.8924	1.04e-28	9.68e-27
piRNA|DQ592953	8.05595	14.4053	1.23e-44	3.61e-42
piRNA|DQ594453	8.41432	17.7808	1.48e-46	8.68e-44
piRNA|DQ599478	8.43025	3.03624	0.000137722	0.000510587
piRNA|DQ575660	8.53058	18.0509	3.47e-48	6.1e-45
piRNA|DQ575882	8.61876	15.2129	3.24e-26	2.19e-24
Grc38_ENST00000583357|miRNA	8.67841	5.67643	3.12e-13	3.74e-12
Grc38_ENST00000584178|miRNA	8.69536	7.13649	9.61e-20	2.77e-18
piRNA|DQ597971	9.08274	11.5496	2.24e-16	4.11e-15
Grc38_ENST00000385044|miRNA	9.56672	8.41003	4.45e-29	4.35e-27
piRNA|DQ597975	9.57488	15.2179	3.81e-35	5.59e-33
piRNA|DQ576872	9.65277	15.1273	5.74e-38	1.12e-35
piRNA|DQ572769	9.7184	4.31486	4.35e-06	2.03e-05
piRNA|DQ598183	10.8271	12.5882	1.58e-15	2.52e-14
piRNA|DQ590139	14.1421	11.7581	1.66e-11	1.67e-10
